# Supplementary material for: Iridium catalysed C2 site-selective methylation of indoles using a pivaloyl directing group through weak chelation-assistance
Source: Royal Society of Chemistry journal article supplement (doi:10.1039/d3ra02031b), 2023-01-01
Supplement: d3ra02031b1.pdf [file d3ra02031b1.pdf]

## Electronic supporting information

### Iridium catalyzed C2 site-selective methylation of indoles using pivaloyl directing group through weak chelation-assistance

Subban Kathiravan,<sup>\*a</sup> Tianshu Zhang,<sup>b</sup> and Ian A. Nicholls<sup>b</sup>

<sup>a</sup>Attana AB, Greta Arwidssons Väg 21, 11419 Stockholm, Sweden

<sup>b</sup>*Bioorganic & Biophysical Chemistry Laboratory,  
Linnaeus University Centre for Biomaterials Chemistry, Department of Chemistry &  
Biomedical Sciences, Linnaeus University, Kalmar SE-39182, Sweden*

e-mail: [suppan.kathiravan@lnu.se](mailto:suppan.kathiravan@lnu.se)

## **Table of contents**

|                             |    |
|-----------------------------|----|
| 1. General information      | 3  |
| 2. Synthesis of substrates  | 4  |
| 3. Scope of directing group | 4  |
| 3. Mechanistic studies      | 5  |
| 4. NMR data                 | 9  |
| 5. Copies of NMR spectra    | 16 |
| 6. References               | 88 |

## 1. General information

All the catalytic reactions were conducted under nitrogen atmosphere using standard Schlenk technique. The solvents and chemicals were purchased from Aldrich (Germany) and Chemtronica (Sweden). All glassware was dried overnight at 120 °C and if needed flame dried further. Column chromatography was performed on silica gel (Carlo Erba, 60Å). Thin layer chromatography was performed on silica gel precoated on aluminum foil containing a fluorescence indicator (254 nm). Preparative thin layer chromatography was performed on plates from Aldrich (Analtech, UV<sub>254</sub> 20×20 cm, 500 micron). Yields refer to isolated compounds, and <sup>1</sup>H NMR was used to determine their purity. Nuclear magnetic resonance (NMR) spectroscopy was performed at 400 MHz (<sup>1</sup>H NMR), 101 MHz (<sup>13</sup>C NMR), and 376 MHz (<sup>19</sup>F NMR) on a Bruker Ascend 400 instrument. Chemical shifts (δ) are provided in ppm and spectra referenced to non-deuterated solvent signals. Mass spectra (HRMS) were obtained from Lund University Kemi Centrum Mass Spectrometry facility. Instrument: Waters XEVO-G2 QTOF. ESI+: Capillary voltage 3 kV, Cone voltage 35V, Ext 4, Source Temp 120, Des Temp 300, Cone gas 50, Des gas 400. Continuum resolution mode, m/z 100-1200, manual lock mass correction using Leucine Enkephalin (m/z 556.2771).

*N*-Methylation and benzylation of indoles and installation of directing groups were performed following our previously described procedure.<sup>1</sup> Indoles **1a-u**,<sup>1</sup> **v-w**,<sup>2</sup> **A-C**,<sup>1</sup> **D-E**,<sup>3</sup> **F**,<sup>1</sup> **G**<sup>4</sup> were prepared according to the literature. MeBF<sub>3</sub>K, Me(BO)<sub>3</sub>, and MeB(OH)<sub>2</sub> were commercially available and purchased from Merck and Chemtronica.

**Table S1. Scope of directing groups:**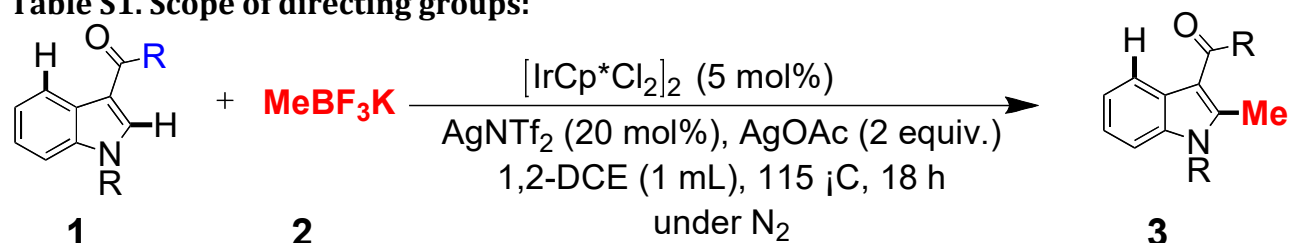

| S. No | Indole |           | Yield (3)<br>(NR = No reaction) |
|-------|--------|-----------|---------------------------------|
| 1     |        | <b>1a</b> | 89%                             |
| 2     |        | <b>A</b>  | Trace                           |
| 3     |        | <b>B</b>  | NR                              |
| 4     |        | <b>C</b>  | NR                              |
| 5     |        | <b>D</b>  | NR                              |
| 6     |        | <b>E</b>  | NR                              |
| 7     |        | <b>F</b>  | NR                              |
| 8     |        | <b>G</b>  | NR                              |
| 9     |        | <b>H</b>  | NR                              |
| 10    |        | <b>I</b>  | NR                              |

**Mechanistic studies**

A series of isotope experiments (Scheme SI-1a-c) were conducted to study the mechanism of the iridium-catalyzed methylation reaction. The initial experiments involved H/D scrambling studies with deuterated solvents under optimized reaction conditions. In a control experiment, N-methyl-3-pivaloyl indole (1a) was treated with co-solvent D<sub>2</sub>O (40 equiv.)

without the methylation reagent, resulting in almost complete deuterium incorporation at the C2 and C4 positions in the isolated product, indicating the reversible formation of a five and six-membered iridacycle at these positions (Scheme SI-1a). However, in an additive-free experiment with D<sub>2</sub>O (20 equiv.), there was negligible H/D exchange, indicating that the additive is a key component for the reversible formation of the iridacycle, as observed during the initial optimization reactions (Scheme-SI-1b). Under optimized conditions, a study without oxidant revealed 12% leaching, as observed by deuterium incorporation at the C5, C6, and C7 positions of the arene ring, in addition to around 85% D/H scrambling at the C2 and C4 positions. This result indicates that the C5, C6, and C7 C-H bonds are also capable of undergoing considerable reversible C-H activation (Scheme-SI-1c), offering opportunities for future studies using these catalytic systems for the synthesis of metal-catalyzed undirected reactions.<sup>5</sup>

Furthermore, when the 2-protected indole (**1x**) was subjected to the methylation reactions. The isolation of unreacted starting material indicates that the reaction happens exclusively at C2 position (Scheme-SI-1d). In order to understand the working mechanism of this reaction, we performed intermolecular competition experiments with differently substituted indoles. This study showed that the electron donating group (OMe) substituted indole gave product in 52% isolated yield by having higher reactivity than electron withdrawing group substituted (COOMe) indole, which afforded only 25% product formation (Scheme-SI-1e). This result suggests that the electrophilic substitution type mechanism is could operative in this case.<sup>6</sup> Higher efficiency was also observed upon scale-up, with a 1 mmol scale reaction furnishing the isolated product (**3a**) in 94% yield, 0.200 g of product (Scheme-SI-1f).

#### a) H/D exchange studies with D<sub>2</sub>O under standard reaction conditions

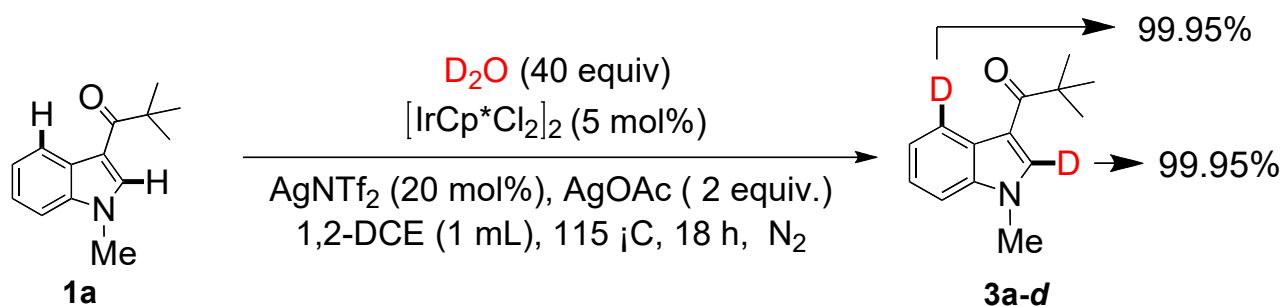

**Scheme SI-a**

b) H/D exchange studies with D<sub>2</sub>O without additive

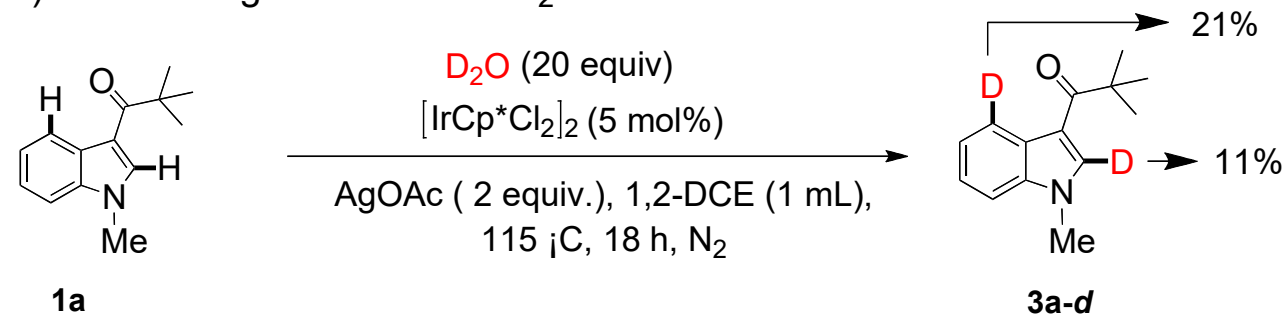

Scheme SI-b

c) H/D exchange studies with D<sub>2</sub>O without oxidant

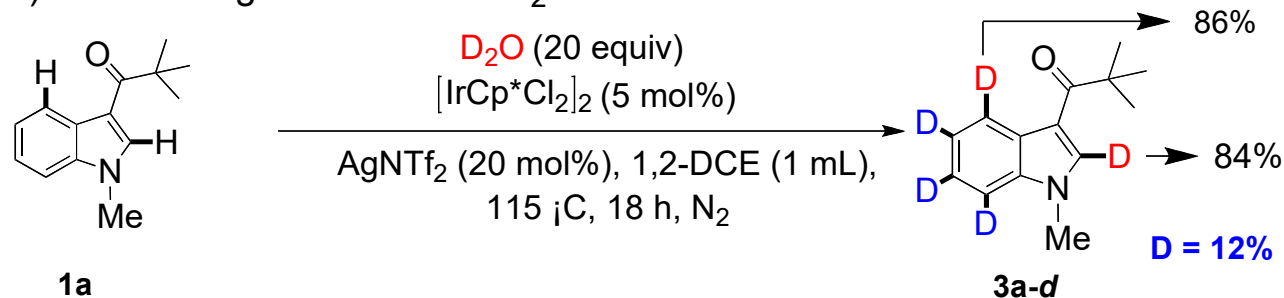

Scheme SI-c

d) Methylation studies with C2 protected indole derivative

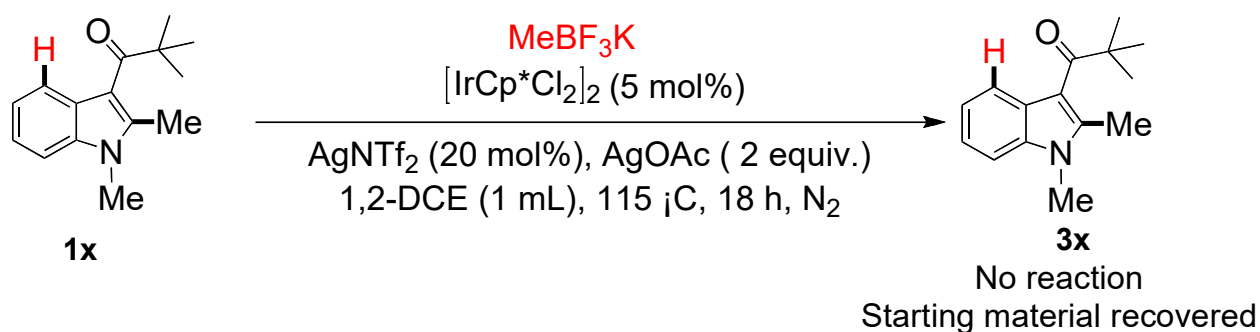

e) Competition study

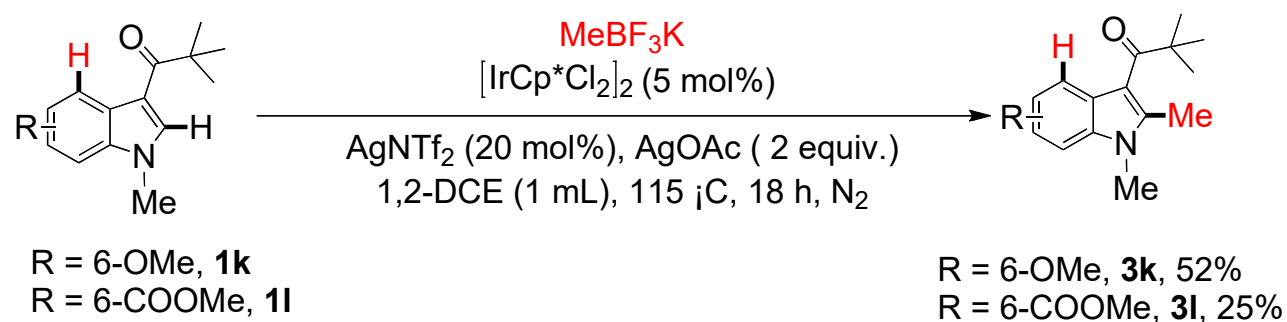

Scheme SI a-e

### Procedure for mechanistic studies

In a 10 mL screw cap reaction tube, pivaloyl indole (1 equiv.), potassium trifluoromethylborate (5 equiv.), AgNTf<sub>2</sub> (20 mol%), Ir(III) catalyst (5 mol%), and silver acetate (2 equiv.) were added together. Then the reaction tube was evacuated and filled with nitrogen (three times). 1,2-dichloroethane (1 mL) and D<sub>2</sub>O (40 equiv) was added under nitrogen to the reaction mixture and then allowed to warm to 115 °C for 23h. Then the tube was cooled down to room temperature and filtered through celite by washing with acetone (30 mL) and the resulting crude reaction mixture was evaporated under reduced pressure. Then the residue was subjected to preparative thin layer chromatography.

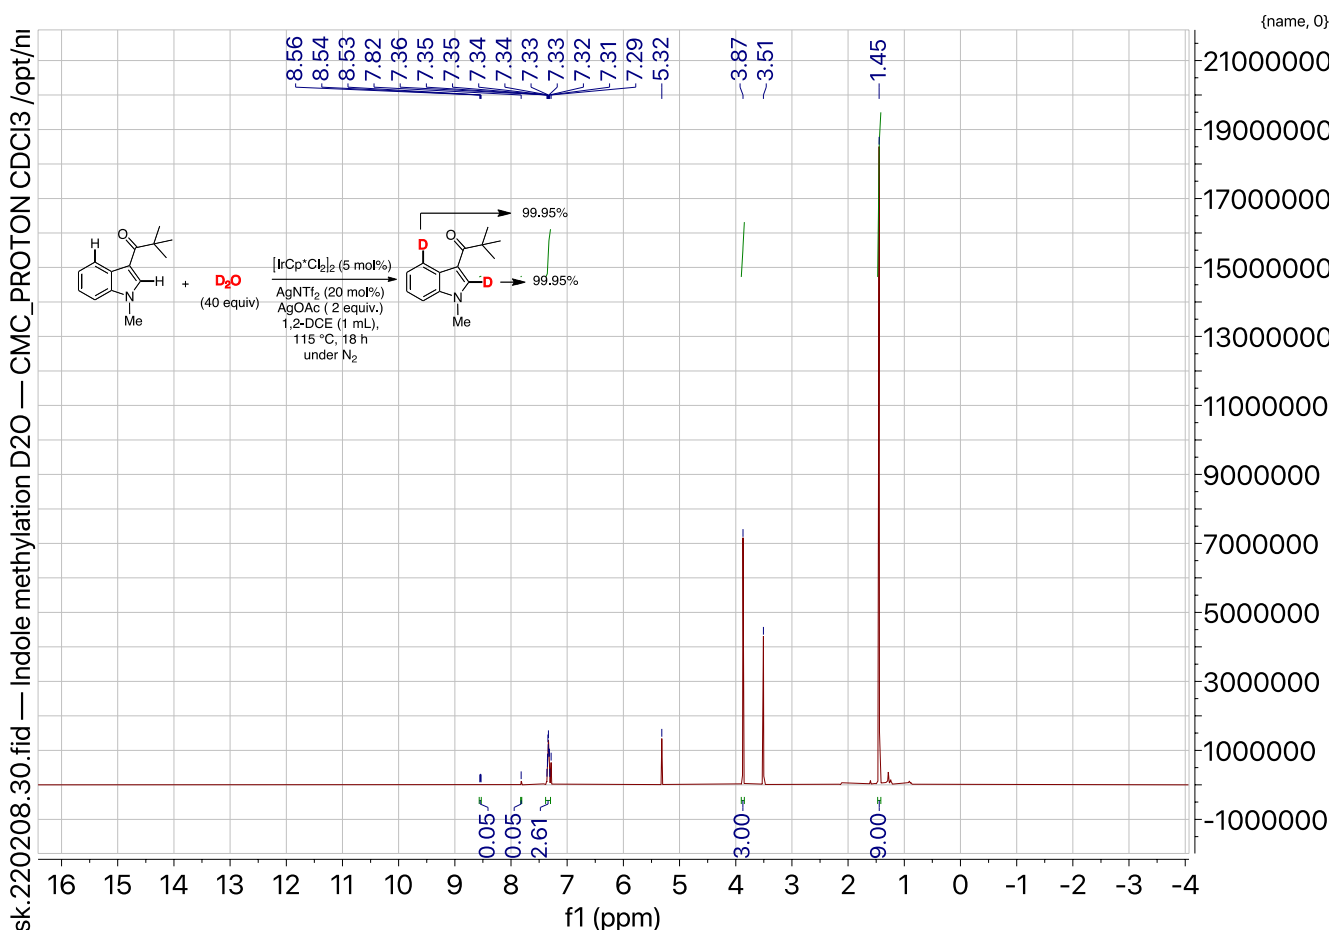

Fig S1 – Deuterium studies under optimized conditions

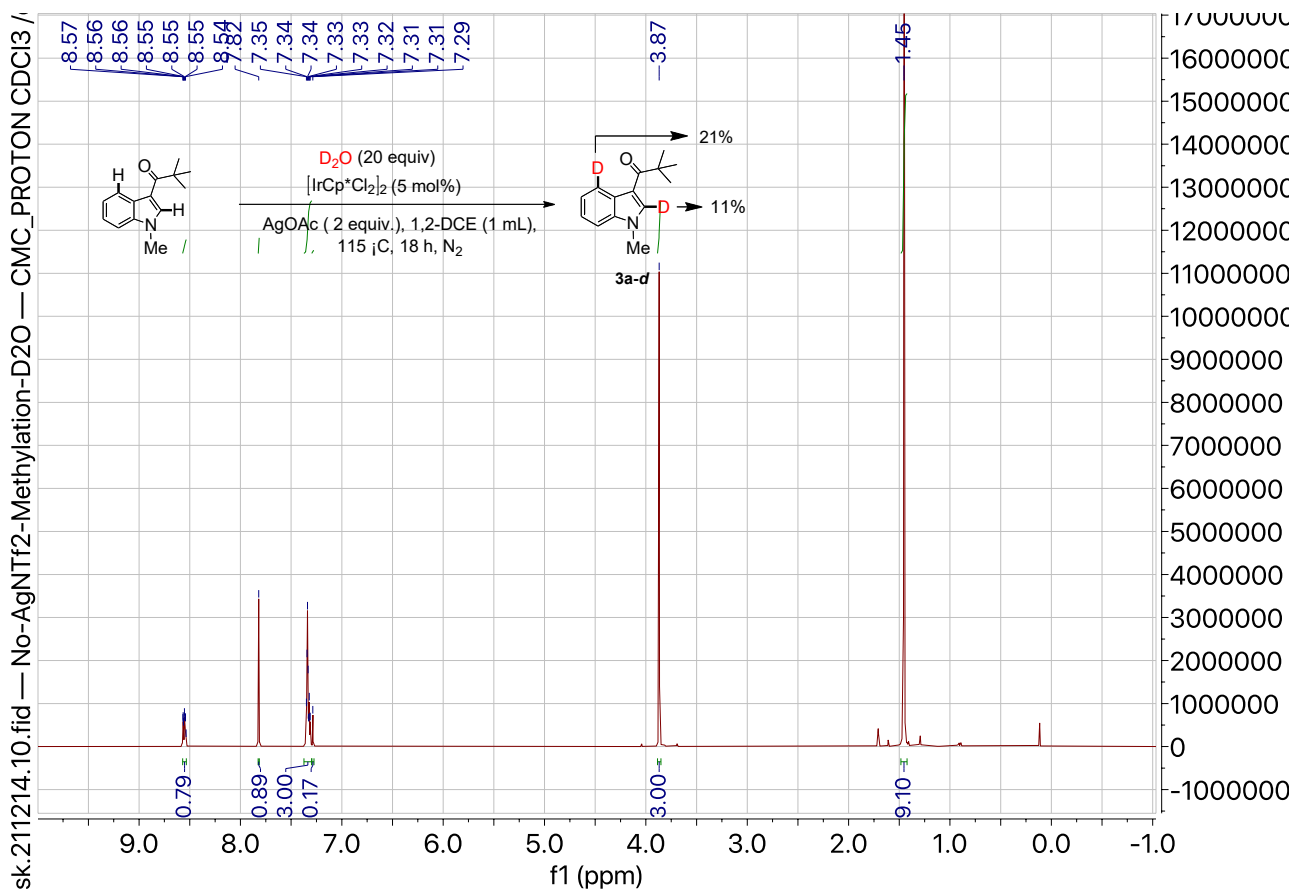

**Fig S2** – Deuterium studies under optimized conditions without additive

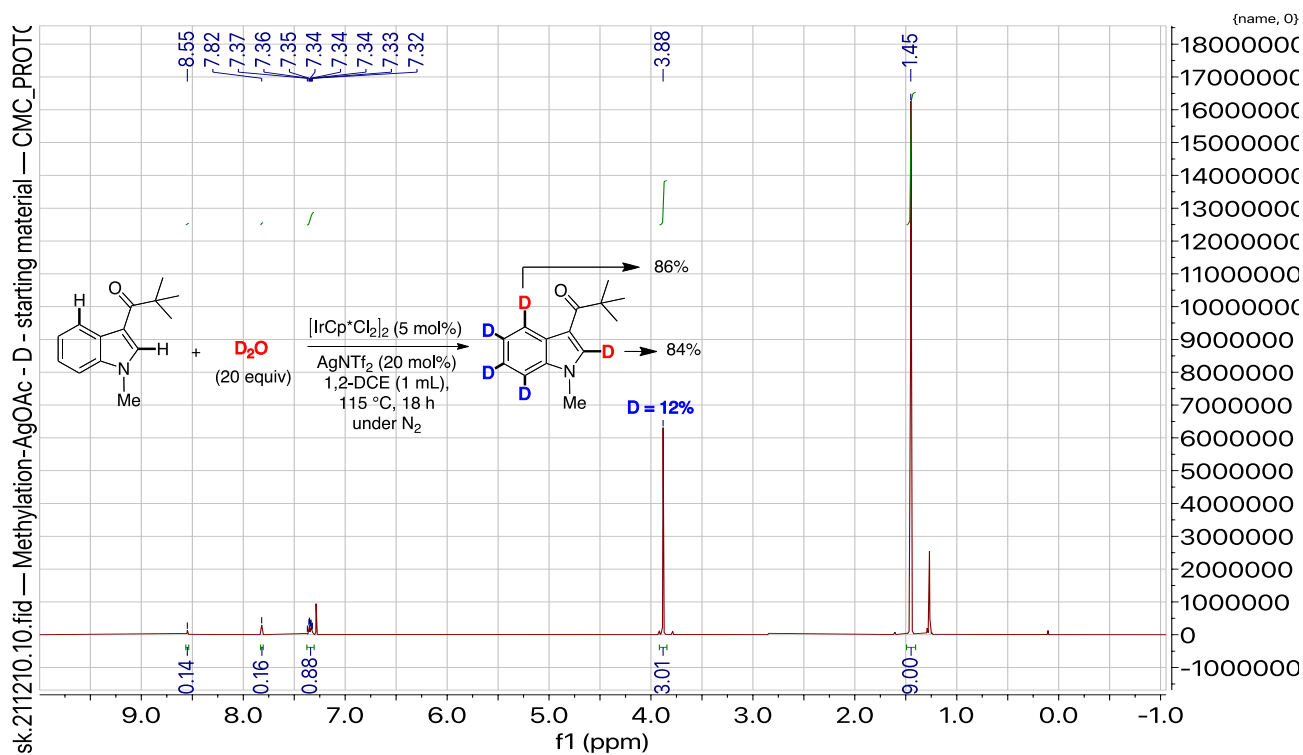

**Fig S3** – Deuterium studies under optimized conditions without oxidant



## General procedure for the C-H methylation of indole – 1mmol scales

### f) 1 mmol study

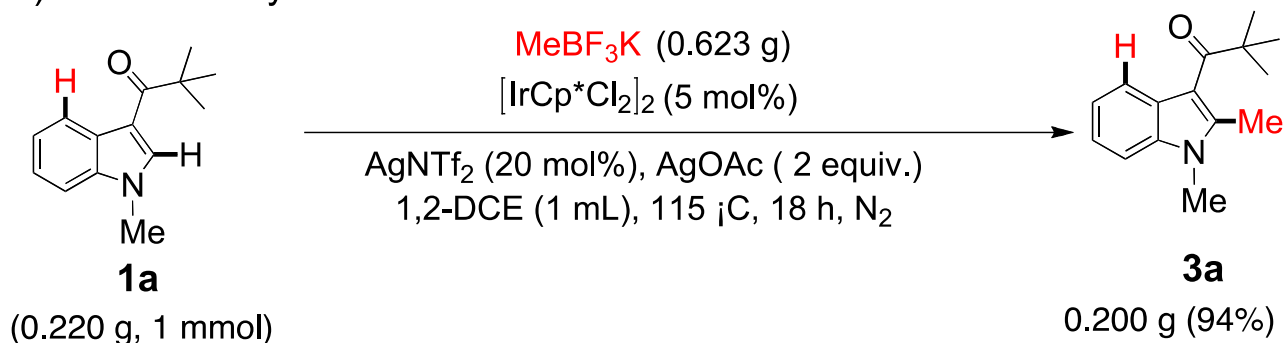

### Scheme SI-f

In an 50 mL screw cap reaction tube, pivaloyl indole (0.22 g, 1 mmol, 1 equiv.), potassium methyltrifluoroborate (0.623 g, 5 equiv.), AgNTf<sub>2</sub> (0.038g, 20 mol%), Ir(III) catalyst (0.0178g, 2.5 mol%), and silver acetate (0.33g, 2 equiv.) were added together. Then the reaction tube was evacuated and filled with nitrogen (three times). 1,2-dichloroethane (4 mL) was added under nitrogen to the reaction mixture and then allowed to warm to 115 °C for 24 h. Then the tube was cooled down to room temperature and filtered through celite by washing with acetone (30 mL) and the resulting crude reaction mixture was evaporated under reduced pressure. Then the residue was subjected to column chromatography using petroleum ether and acetone as an eluent (90:10 mL).

## General procedure for the C-H methylation of indole

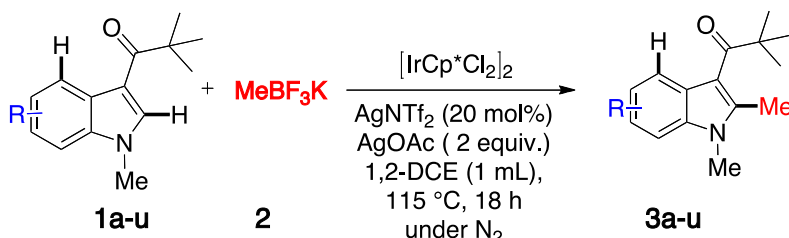

In an 10 mL screw cap reaction tube, pivaloyl indole (1 equiv.), potassium trifluoromethylborate (5 equiv.), AgNTf<sub>2</sub> (20 mol%), Ir(III) catalyst (5 mol%), and silver acetate (2 equiv.) were added together. Then the reaction tube was evacuated and filled with nitrogen (three times). 1,2-dichloroethane (1 mL) was added under nitrogen to the reaction mixture and then allowed to warm to 115 °C for 23h. Then the tube was cooled down to room temperature and filtered through celite by washing with acetone (30 mL) and the resulting crude reaction mixture was evaporated under reduced pressure. Then the residue was subjected to preparative thin layer chromatography.

## 4. NMR data

### 1-(1,2-dimethyl-1H-indol-3-yl)-2,2-dimethyl-1-propanone (3a)

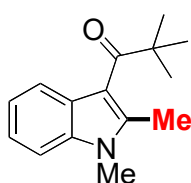

General procedure was followed using **1a** (50 mg, 23 μmol, 1.0 equiv.), **2** (140 mg, 1.15 mmol, 5 equiv.), AgNTf<sub>2</sub> (15 mg, 20 mol%), [IrCp\*Cl<sub>2</sub>]<sub>2</sub> (8.2 mg, 5 mol%), AgOAc (76 mg, 0.46 mmol, 2 equiv), 1,2-DCE (1 mL), at 115°C for 23 h. Preparative thin layer chromatography was eluted using 90 mL petroleum ether and 10 mL acetone combination yielded **3a** (47 mg, 89%). M. pt – 61–63°C; Yellow solid; <sup>1</sup>H NMR (400 MHz, Chloroform-*d*) δ 7.72 – 7.67 (m, 1H),

7.33 – 7.28 (m, 1H), 7.25 – 7.16 (m, 2H), 3.70 (s, 3H), 2.51 (s, 3H), 1.41 (s, 9H). <sup>13</sup>C NMR (101 MHz, CDCl<sub>3</sub>) δ 209.41, 140.0, 136.2, 125.3, 121.3, 121.1, 120.4, 115.1, 109.2, 44.5, 29.5, 27.4, 12.3. HRMS (ESI): Exact mass calculated for C<sub>15</sub>H<sub>19</sub>NO [M+H]<sup>+</sup>: 230.1547, found: 230.1545

### 1-(1,2-dimethyl-5-methoxy-1H-indol-3-yl)-2,2-dimethyl-1-propanone (3b)

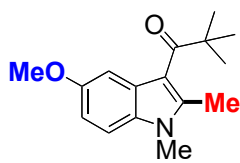

General procedure was followed using **1b** (57 mg, 23 mmol, 1.0 equiv.), **2** (140 mg, 1.15 mmol, 5 equiv.), AgNTf<sub>2</sub> (15 mg, 20 mol%), [IrCp\*Cl<sub>2</sub>]<sub>2</sub> (8.2 mg, 5 mol%), AgOAc (76 mg, 0.46 mmol, 2 equiv), 1,2-DCE (1 mL), at 115°C for 23 h. Preparative thin layer chromatography was eluted using 90 mL petroleum ether and 10 mL acetone combination yielded **3b** (23 mg, 39%). Yellow solid.

M. pt – 111-113 °C. <sup>1</sup>H NMR (400 MHz, Chloroform-*d*) δ 7.18 (d, *J* = 2.2 Hz, 1H), 6.88 (dd, *J* = 8.8, 2.5 Hz, 1H), 3.88 (s, 3H), 3.67 (s, 3H), 2.50 (s, 3H), 1.40 (s, 9H). <sup>13</sup>C NMR (101 MHz, CDCl<sub>3</sub>) δ 208.8, 154.6, 140.7, 131.6, 125.7, 114.8, 110.5, 109.7, 104.3, 55.9, 44.4, 29.7, 27.4, 12.6. HRMS (ESI): Exact mass calculated for C<sub>16</sub>H<sub>21</sub>NO<sub>2</sub> [M+H]<sup>+</sup>: 260.1653, found: 260.1651

### 1-(1,2-dimethyl-6-methoxy-1H-indol-3-yl)-2,2-dimethyl-1-propanone (3c)

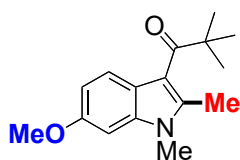

General procedure was followed using **1c** (57 mg, 23 mmol, 1.0 equiv.), **2** (140 mg, 1.15 mmol, 5 equiv.), AgNTf<sub>2</sub> (15 mg, 20 mol%), [IrCp\*Cl<sub>2</sub>]<sub>2</sub> (8.2 mg, 5 mol%), AgOAc (76 mg, 0.46 mmol, 2 equiv), 1,2-DCE (1 mL), at 115°C for 23 h. Preparative thin layer chromatography was eluted using 90 mL petroleum ether and 10 mL acetone combination yielded **3c** (18 mg, 31%). Yellow solid. M. Pt – 90-94°C.

<sup>1</sup>H NMR (400 MHz, Methanol-*d*<sub>4</sub>) δ 7.50 (d, *J* = 8.8 Hz, 1H), 6.91 (d, *J* = 2.3 Hz, 1H), 6.80 (dd, *J* = 8.8, 2.4 Hz, 1H), 3.87 (s, 3H), 3.67 (s, 3H), 2.44 (s, 3H), 1.35 (s, 9H). <sup>13</sup>C NMR (101 MHz, MeOD) δ 210.4, 156.1, 139.6, 137.3, 121.1, 119.2, 114.2, 109.7, 92.9, 43.9, 28.5, 26.4, 11.0. HRMS (ESI): Exact mass calculated for C<sub>16</sub>H<sub>21</sub>NO [M+H]<sup>+</sup>: 260.1654, found: 260.1651

### 1-(1,2-dimethyl-5-methylcarboxylate-1H-indol-3-yl)-2,2-dimethyl-1-propanone (3d)

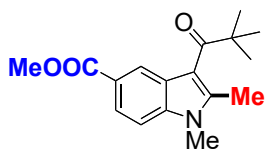

General procedure was followed using **1d** (65 mg, 23 mmol, 1.0 equiv.), **2** (140 mg, 1.15 mmol, 5 equiv.), AgNTf<sub>2</sub> (15 mg, 20 mol%), [IrCp\*Cl<sub>2</sub>]<sub>2</sub> (8.2 mg, 5 mol%), AgOAc (76 mg, 0.46 mmol, 2 equiv), 1,2-DCE (1 mL), at 115°C for 23 h. Preparative thin layer chromatography was eluted using 90 mL petroleum ether and 10 mL acetone combination yielded **3d** (54 mg, 82%). Colorless solid. M. Pt – 125-126°C.

<sup>1</sup>H NMR (400 MHz, Chloroform-*d*) δ 8.38 (d, *J* = 1.6 Hz, 1H), 7.91 (dd, *J* = 8.6, 1.6 Hz, 1H), 7.28 (d, *J* = 8.7 Hz, 1H), 3.94 (s, 3H), 3.70 (s, 3H), 2.46 (s, 3H), 1.38 (s, 9H). <sup>13</sup>C NMR (101 MHz, CDCl<sub>3</sub>) δ 209.7, 167.9, 140.1, 138.6, 125.0, 123.4, 122.8, 122.3, 116.1, 108.8, 51.9, 44.8, 29.8, 27.3, 12.2. HRMS (ESI): Exact mass calculated for C<sub>17</sub>H<sub>21</sub>N<sub>2</sub>O<sub>3</sub> [M+H]<sup>+</sup>: 288.1599, found: 288.1600

### 1-(1,2-dimethyl-6-methylcarboxylate-1H-indol-3-yl)-2,2-dimethyl-1-propanone (3e)

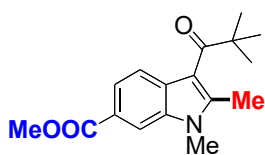

General procedure was followed using **1e** (65 mg, 23 mmol, 1.0 equiv.), **2** (140 mg, 1.15 mmol, 5 equiv.), AgNTf<sub>2</sub> (15 mg, 20 mol%), [IrCp\*Cl<sub>2</sub>]<sub>2</sub> (8.2 mg, 5 mol%), AgOAc (76 mg, 0.46 mmol, 2 equiv), 1,2-DCE (1 mL), at 115°C for 23 h. Preparative thin layer chromatography was eluted using 90 mL petroleum ether and 10 mL acetone combination yielded **3e** (40 mg, 60%). Green solid. M. Pt – 117-117°C.

<sup>1</sup>H NMR (400 MHz, Chloroform-*d*) δ 8.07 – 8.05 (m, 1H), 7.85 (dd, *J* = 8.5, 1.5 Hz, 1H), 7.64 (d, *J* = 8.5 Hz, 1H), 3.96 (s, 3H), 3.77 (s, 3H), 2.50 (s, 3H), 1.37 (s, 9H). <sup>13</sup>C NMR (101 MHz, CDCl<sub>3</sub>) δ 209.5, 167.8, 142.5, 135.6, 128.8, 122.9, 121.5, 120.3, 115.5, 111.4, 52.0, 44.7, 29.8, 27.3, 12.4. HRMS (ESI): Exact mass calculated for C<sub>17</sub>H<sub>21</sub>N<sub>2</sub>O<sub>3</sub> [M+H]<sup>+</sup>: 288.1599, found: 288.1600

### 1-(1,2-dimethyl-5-nitro-1H-indol-3-yl)-2,2-dimethyl-1-propanone (3f)

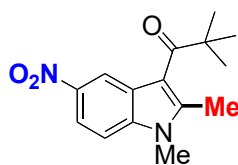

General procedure was followed using **1f** (60 mg, 23 mmol, 1.0 equiv.), **2** (140 mg, 1.15 mmol, 5 equiv.), AgNTf<sub>2</sub> (15 mg, 20 mol%), [IrCp\*Cl<sub>2</sub>]<sub>2</sub> (8.2 mg, 5 mol%), AgOAc (76 mg, 0.46 mmol, 2 equiv), 1,2-DCE (1 mL), at 115°C for 23 h. Preparative thin layer chromatography was eluted using 90 mL petroleum ether and 10 mL acetone combination yielded **3f** (40 mg, 60%). Yellow solid. M. Pt – 138-142°C. <sup>1</sup>H NMR (400 MHz, Chloroform-*d*) δ 8.54 (d, *J* = 2.2 Hz, 1H), 8.10 (dd, *J* = 9.1, 2.2 Hz, 1H), 7.33 (d, *J* = 9.1 Hz, 1H), 3.76 (s, 3H), 2.48 (s, 3H), 1.37 (s, 9H). <sup>13</sup>C NMR (101 MHz, CDCl<sub>3</sub>) δ 209.2, 142.1, 141.4, 138.9, 124.7, 117.4, 117.0, 116.9, 109.0, 45.0, 30.2, 27.3, 12.4. HRMS (ESI): Exact mass calculated for C<sub>15</sub>H<sub>18</sub>N<sub>2</sub>O<sub>3</sub> [M+H]<sup>+</sup>: 275.1392, found: 275.1396

### 1-(1,2-dimethyl-5-cyano-1H-indol-3-yl)-2,2-dimethyl-1-propanone (3g)

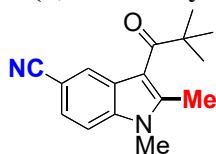

General procedure was followed using **1g** (56 mg, 23 mmol, 1.0 equiv.), **2** (140 mg, 1.15 mmol, 5 equiv.), AgNTf<sub>2</sub> (15 mg, 20 mol%), [IrCp\*Cl<sub>2</sub>]<sub>2</sub> (8.2 mg, 5 mol%), AgOAc (76 mg, 0.46 mmol, 2 equiv), 1,2-DCE (1 mL), at 115°C for 23 h. Preparative thin layer chromatography was eluted using 90 mL petroleum ether and 10 mL acetone combination yielded **3g** (17 mg, 30%). Colorless solid. M. Pt – 103-109 °C. <sup>1</sup>H NMR (400 MHz, Chloroform-*d*) δ 7.92 (d, *J* = 1.1 Hz, 1H), 7.45 (dd, *J* = 8.5, 1.5 Hz, 1H), 7.36 (dd, *J* = 8.5, 0.7 Hz, 1H), 3.74 (s, 3H), 2.48 (s, 3H), 1.35 (s, 9H). <sup>13</sup>C NMR (101 MHz, CDCl<sub>3</sub>) δ 209.3, 140.7, 137.7, 125.8, 125.2, 124.5, 120.5, 115.7, 110.0, 103.5, 29.9, 27.3, 12.3. HRMS (ESI): Exact mass calculated for C<sub>16</sub>H<sub>18</sub>N<sub>2</sub>O<sub>2</sub> [M+H]<sup>+</sup>: 255.1497, found: 255.1497

### 1-(1,2-dimethyl-5-fluoro-1H-indol-3-yl)-2,2-dimethyl-1-propanone (3h)

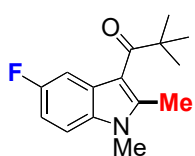

General procedure was followed using **1h** (55 mg, 23 mmol, 1.0 equiv.), **2** (140 mg, 1.15 mmol, 5 equiv.), AgNTf<sub>2</sub> (15 mg, 20 mol%), [IrCp\*Cl<sub>2</sub>]<sub>2</sub> (8.2 mg, 5 mol%), AgOAc (76 mg, 0.46 mmol, 2 equiv), 1,2-DCE (1 mL), at 115°C for 23 h. Preparative thin layer chromatography was eluted using 90 mL petroleum ether and 10 mL acetone combination yielded **3h** (43 mg, 78%). Yellow solid. M. pt –74-77 °C. <sup>1</sup>H NMR (400 MHz, Chloroform-*d*) δ 7.35 (dd, *J* = 10.4, 2.5 Hz, 1H), 7.20 (dd, *J* = 8.9, 4.5 Hz, 1H), 6.95 (td, *J* = 9.0, 2.5 Hz, 1H), 3.68 (s, 3H), 2.49 (s, 3H), 1.38 (s, 9H). <sup>13</sup>C NMR (101 MHz, CDCl<sub>3</sub>) δ 208.7, 159.4, 157.1, 141.7, 132.8, 125.5, 125.4, 115.1, 109.8, 109.7, 109.5, 109.2, 106.5, 106.3, 44.4, 29.8, 27.3, 12.6. <sup>19</sup>F NMR (376 MHz, CDCl<sub>3</sub>) δ -123.17, -123.18, -123.19, -123.19, -123.20, -123.22, -123.23. HRMS (ESI): Exact mass calculated for C<sub>15</sub>H<sub>18</sub>FNO [M+H]<sup>+</sup>: 248.1450, found: 248.1451.

### 1-(1,2-dimethyl-5-chloro-1H-indol-3-yl)-2,2-dimethyl-1-propanone (3i)

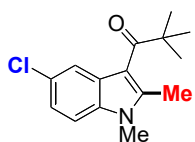

General procedure was followed using **1i** (58 mg, 23 mmol, 1.0 equiv.), **2** (140 mg, 1.15 mmol, 5 equiv.), AgNTf<sub>2</sub> (15 mg, 20 mol%), [IrCp\*Cl<sub>2</sub>]<sub>2</sub> (8.2 mg, 5 mol%), AgOAc (76 mg, 0.46 mmol, 2 equiv), 1,2-DCE (1 mL), at 115°C for 23 h. Preparative thin layer chromatography was eluted using 90 mL petroleum ether and 10 mL acetone combination yielded **3i** (37 mg, 61%). Yellow solid. M. pt –89-91 °C. <sup>1</sup>H NMR (400 MHz, Chloroform-*d*) δ 7.61 (d, *J* = 1.9 Hz, 1H), 7.23 – 7.12 (m, 2H), 3.68 (s, 3H), 2.47 (s, 3H), 1.37 (s, 9H). <sup>13</sup>C NMR (101 MHz, CDCl<sub>3</sub>) δ 209.1, 140.6, 134.6, 126.3, 126.2, 121.5, 120.3, 114.7, 110.1, 44.6, 29.7, 27.4, 12.4. HRMS (ESI): Exact mass calculated for C<sub>15</sub>H<sub>18</sub>ClNO [M+H]<sup>+</sup>: 264.1154, found: 264.1155.

### 1-(1,2-dimethyl-6-chloro-1H-indol-3-yl)-2,2-dimethyl-1-propanone (3j)

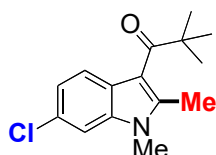

General procedure was followed using **1j** (58 mg, 23 mmol, 1.0 equiv.), **2** (140 mg, 1.15 mmol, 5 equiv.), AgNTf<sub>2</sub> (15 mg, 20 mol%), [IrCp\*Cl<sub>2</sub>]<sub>2</sub> (8.2 mg,

5 mol%), AgOAc (76 mg, 0.46 mmol, 2 equiv), 1,2-DCE (1 mL), at 115°C for 23 h. Preparative thin layer chromatography was eluted using 90 mL petroleum ether and 10 mL acetone combination yielded **3j** (40 mg, 68%). Yellow solid. M.Pt – 129-133 °C. <sup>1</sup>H NMR (400 MHz, Chloroform-*d*) δ 7.52 (d, *J* = 8.6 Hz, 1H), 7.27 (d, *J* = 1.9 Hz, 1H), 7.10 (dd, *J* = 8.6, 1.9 Hz, 1H), 3.63 (s, 3H), 2.44 (s, 3H), 1.34 (s, 9H). <sup>13</sup>C NMR (101 MHz, CDCl<sub>3</sub>) δ 209.6, 140.2, 136.7, 127.3, 123.8, 121.7, 120.9, 115.0, 109.2, 44.6, 29.6, 27.3, 12.2. HRMS (ESI): Exact mass calculated for C<sub>15</sub>H<sub>18</sub>ClNO [M+H]<sup>+</sup>: 264.1153, found: 264.1153.

### 1-(1,2-dimethyl-5-bromo-1H-indol-3-yl)-2,2-dimethyl-1-propanone (**3k**)

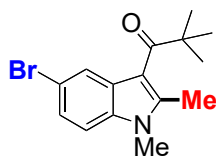

General procedure was followed using **1k** (68 mg, 23 mmol, 1.0 equiv.), **2** (140 mg, 1.15 mmol, 5 equiv.), AgNTf<sub>2</sub> (15 mg, 20 mol%), [IrCp\*Cl<sub>2</sub>]<sub>2</sub> (8.2 mg, 5 mol%), AgOAc (76 mg, 0.46 mmol, 2 equiv), 1,2-DCE (1 mL), at 115°C for 23 h. Preparative thin layer chromatography was eluted using 90 mL petroleum ether and 10 mL acetone combination yielded **3k** (46 mg, 66%). Yellow solid.

M. pt –110-113 °C. <sup>1</sup>H NMR (400 MHz, Chloroform-*d*) δ 7.75 (d, *J* = 1.8 Hz, 1H), 7.31 – 7.27 (m, 1H), 7.15 (d, *J* = 8.6 Hz, 1H), 3.67 (s, 3H), 2.47 (s, 3H), 1.37 (s, 9H).

<sup>13</sup>C NMR (101 MHz, CDCl<sub>3</sub>) δ 209.2, 140.3, 134.9, 126.9, 124.1, 123.3, 114.6, 113.7, 110.5, 44.6, 29.7, 27.4, 12.4. HRMS (ESI): Exact mass calculated for C<sub>15</sub>H<sub>18</sub>BrNO [M+H]<sup>+</sup>: 308.0650, found: 308.0650

### 1-(1,2-dimethyl-5-iodo-1H-indol-3-yl)-2,2-dimethyl-1-propanone (**3l**)

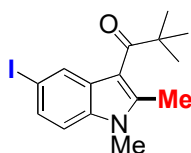

General procedure was followed using **1l** (80 mg, 23 mmol, 1.0 equiv.), **2** (140 mg, 1.15 mmol, 5 equiv.), AgNTf<sub>2</sub> (15 mg, 20 mol%), [IrCp\*Cl<sub>2</sub>]<sub>2</sub> (8.2 mg, 5 mol%), AgOAc (76 mg, 0.46 mmol, 2 equiv), 1,2-DCE (1 mL), at 115°C for 23 h. Preparative thin layer chromatography was eluted using 90 mL petroleum ether and 10 mL acetone combination yielded **3l** (59 mg, 72%). Brown solid.

M. Pt – 133-135 °C. <sup>1</sup>H NMR (400 MHz, Chloroform-*d*) δ 7.91 (d, *J* = 1.7 Hz, 1H), 7.42 (dd, *J* = 8.6, 1.6 Hz, 1H), 7.03 (d, *J* = 8.6 Hz, 1H), 3.63 (s, 3H), 2.43 (s, 3H), 1.33 (s, 9H). <sup>13</sup>C NMR (101 MHz, CDCl<sub>3</sub>) δ 209.7, 139.9, 135.3, 129.7, 129.4, 127.7, 114.2, 111.1, 84.0, 44.7, 29.6, 27.3, 12.3. HRMS (ESI): Exact mass calculated for C<sub>15</sub>H<sub>18</sub>I NO [M+H]<sup>+</sup>: 356.0503, found: 356.0500

### 1-(1,2-dimethyl-1,6,7,8-tetrahydrocyclopenta[*g*]-1H-indol-3-yl)-2,2-dimethyl-1-propanone (**3m**)

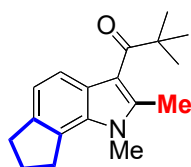

General procedure was followed using **1m** (59 mg, 23 mmol, 1.0 equiv.), **2** (140 mg, 1.15 mmol, 5 equiv.), AgNTf<sub>2</sub> (15 mg, 20 mol%), [IrCp\*Cl<sub>2</sub>]<sub>2</sub> (8.2 mg, 5 mol%), AgOAc (76 mg, 0.46 mmol, 2 equiv), 1,2-DCE (1 mL), at 115°C for 23 h. Preparative thin layer chromatography was eluted using 90 mL petroleum ether and 10 mL acetone combination yielded **3m** (33 mg, 54%). Yellow solid.

M. Pt – 147-149 °C. <sup>1</sup>H NMR (400 MHz, Chloroform-*d*) δ 7.40 (d, *J* = 8.1 Hz, 1H), 7.05 (d, *J* = 8.1 Hz, 1H), 3.87 (s, 3H), 3.41 (t, *J* = 7.4 Hz, 2H), 3.03 (t, *J* = 7.5 Hz, 2H), 2.42 (s, 3H), 2.21 (p, *J* = 7.5 Hz, 2H), 1.37 (s, 9H). <sup>13</sup>C NMR (101 MHz, CDCl<sub>3</sub>) δ 210.7, 138.6, 137.6, 133.6, 124.8, 124.4, 119.1, 117.1, 115.8, 44.7, 32.5, 31.9, 31.6, 27.5, 25.4, 12.2. HRMS (ESI): Exact mass calculated for C<sub>18</sub>H<sub>23</sub>NO [M+H]<sup>+</sup>: 270.1860, found: 270.1858.

### 1-(1,2-dimethyl-7-bromo-1H-indol-3-yl)-2,2-dimethyl-1-propanone (**3n**)

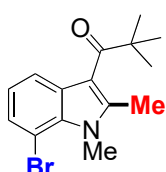

General procedure was followed using **1n** (68 mg, 23 mmol, 1.0 equiv.), **2** (140 mg, 1.15 mmol, 5 equiv.), AgNTf<sub>2</sub> (15 mg, 20 mol%), [IrCp\*Cl<sub>2</sub>]<sub>2</sub> (8.2 mg, 5 mol%), AgOAc (76 mg, 0.46 mmol, 2 equiv), 1,2-DCE (1 mL), at 115°C for 23 h. Preparative thin layer chromatography was eluted using 90 mL petroleum ether and 10 mL acetone combination yielded **3n** (51 mg, 73%).

Yellow solid. M. Pt – 67-70 °C.  $^1\text{H NMR}$  (400 MHz, Chloroform-*d*)  $\delta$  7.42 (dd,  $J = 8.0, 1.0$  Hz, 1H), 7.34 (dd,  $J = 7.7, 1.0$  Hz, 1H), 6.94 (t,  $J = 7.8$  Hz, 1H), 4.09 (s, 3H), 2.39 (s, 3H), 1.32 (s, 9H).  $^{13}\text{C NMR}$  (101 MHz,  $\text{CDCl}_3$ )  $\delta$  211.3, 138.0, 132.6, 128.7, 126.9, 121.0, 119.6, 115.9, 103.5, 45.3, 32.6, 27.4, 12.6. **HRMS (ESI)**: Exact mass calculated for  $\text{C}_{15}\text{H}_{18}\text{BrNO}$   $[\text{M}+\text{H}]^+$ : 308.0648, found: 308.0650

### 1-(1,2-dimethyl-7-methyl-1H-indol-3-yl)-2,2-dimethyl-1-propanone (3o)

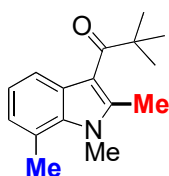

General procedure was followed using **1o** (54 mg, 23 mmol, 1.0 equiv.), **2** (140 mg, 1.15 mmol, 5 equiv.),  $\text{AgNTf}_2$  (15 mg, 20 mol%),  $[\text{IrCp}^*\text{Cl}_2]_2$  (8.2 mg, 5 mol%),  $\text{AgOAc}$  (76 mg, 0.46 mmol, 2 equiv), 1,2-DCE (1 mL), at 115°C for 23 h. Preparative thin layer chromatography was eluted using 90 mL petroleum ether and 10 mL acetone combination yielded **3o** (35mg, 63%). Brown solid. M. Pt – 121-126 °C.  $^1\text{H NMR}$  (400 MHz, Chloroform-*d*)  $\delta$  7.39 (d,  $J = 8.0$  Hz, 1H), 7.03 – 6.97 (m, 1H), 6.92 – 6.88 (m, 1H), 3.96 (s, 3H), 2.80 (s, 3H), 2.40 (s, 3H), 1.35 (s, 9H).  $^{13}\text{C NMR}$  (101 MHz,  $\text{CDCl}_3$ )  $\delta$  211.4, 137.4, 135.0, 126.3, 124.6, 120.6, 120.1, 118.7, 115.9, 45.0, 32.7, 28.1, 27.4, 20.5, 12.4. **HRMS (ESI)**: Exact mass calculated for  $\text{C}_{16}\text{H}_{21}\text{NO}$   $[\text{M}+\text{H}]^+$ : 244.1703, found: 244.1701

### 1-(1-ethyl-2-methyl-1H-indol-3-yl)-2,2-dimethyl-1-propanone (3p)

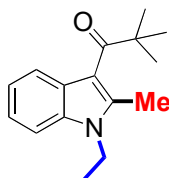

General procedure was followed using **1p** (54 mg, 23 mmol, 1.0 equiv.), **2** (140 mg, 1.15 mmol, 5 equiv.),  $\text{AgNTf}_2$  (15 mg, 20 mol%),  $[\text{IrCp}^*\text{Cl}_2]_2$  (8.2 mg, 5 mol%),  $\text{AgOAc}$  (76 mg, 0.46 mmol, 2 equiv), 1,2-DCE (1 mL), at 115°C for 23 h. Preparative thin layer chromatography was eluted using 90 mL petroleum ether and 10 mL acetone combination yielded **3p** (54 mg, 96%). Yellow liquid.  $^1\text{H NMR}$  (400 MHz, Chloroform-*d*)  $\delta$  7.72 – 7.69 (m, 1H), 7.35 – 7.32 (m, 1H), 7.25 – 7.16 (m, 2H), 4.18 (q,  $J = 7.3$  Hz, 2H), 2.52 (s, 2H), 1.41 (s, 9H), 1.38 (d,  $J = 7.2$  Hz, 3H).  $^{13}\text{C NMR}$  (101 MHz,  $\text{CDCl}_3$ )  $\delta$  209.4, 139.2, 135.1, 125.5, 121.2, 120.3, 115.1, 109.2, 44.5, 37.8, 27.4, 14.9, 12.1. **HRMS (ESI)**: Exact mass calculated for  $\text{C}_{16}\text{H}_{21}\text{NO}$   $[\text{M}+\text{H}]^+$ : 244.1701, found: 244.1701.

### 1-(1-pentyl-2-methyl-1H-indol-3-yl)-2,2-dimethyl-1-propanone (3q)

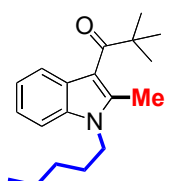

General procedure was followed using **1q** (65 mg, 23 mmol, 1.0 equiv.), **2** (140 mg, 1.15 mmol, 5 equiv.),  $\text{AgNTf}_2$  (15 mg, 20 mol%),  $[\text{IrCp}^*\text{Cl}_2]_2$  (8.2 mg, 5 mol%),  $\text{AgOAc}$  (76 mg, 0.46 mmol, 2 equiv), 1,2-DCE (1 mL), at 115°C for 23 h. Preparative thin layer chromatography was eluted using 90 mL petroleum ether and 10 mL acetone combination yielded **3q** (40 mg, 61%). Yellow liquid.  $^1\text{H NMR}$  (400 MHz, Chloroform-*d*)  $\delta$  7.72 – 7.68 (m, 1H), 7.34 – 7.30 (m, 1H), 7.24 – 7.14 (m, 2H), 4.14 – 4.06 (m, 2H), 2.51 (s, 3H), 1.79 (dd,  $J = 9.2, 5.9$  Hz, 2H), 1.44 – 1.41 (m, 2H), 1.41 (s, 9H), 1.39 (d,  $J = 3.2$  Hz, 3H), 0.94 (td,  $J = 5.6, 4.4, 2.0$  Hz, 3H).  $^{13}\text{C NMR}$  (101 MHz,  $\text{CDCl}_3$ )  $\delta$  209.4, 139.5, 135.6, 125.4, 121.2, 121.2, 120.3, 115.1, 109.4, 44.5, 43.3, 29.5, 29.1, 27.4, 22.4, 13.9, 12.3. **HRMS (ESI)**: Exact mass calculated for  $\text{C}_{19}\text{H}_{27}\text{NO}$   $[\text{M}+\text{H}]^+$ : 286.2168, found: 286.2171.

### 1-(1-hexyl-2-methyl-1H-indol-3-yl)-2,2-dimethyl-1-propanone (3r)

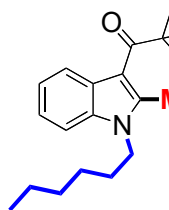

General procedure was followed using **1r** (77 mg, 27 mmol, 1.0 equiv.), **2** (140 mg, 1.15 mmol, 5 equiv.),  $\text{AgNTf}_2$  (15 mg, 20 mol%),  $[\text{IrCp}^*\text{Cl}_2]_2$  (8.2 mg, 5 mol%),  $\text{AgOAc}$  (76 mg, 0.46 mmol, 2 equiv), 1,2-DCE (1 mL), at 115°C for 23 h. Preparative thin layer chromatography was eluted using 90 mL petroleum ether and 10 mL acetone combination yielded **3r** (52 mg, 84%). Yellow liquid.  $^1\text{H NMR}$  (400 MHz, Chloroform-*d*)  $\delta$  7.70 (dd,  $J = 8.2, 1.3$  Hz, 1H), 7.34 – 7.30 (m, 1H), 7.24 – 7.15 (m, 2H), 4.14 – 4.07 (m, 2H), 2.51 (s, 3H), 1.78 (p,  $J = 7.6$  Hz, 2H), 1.42 (d,  $J$

= 1.2 Hz, 2H), 1.41 (s, 9H), 1.38 – 1.29 (m, 5H), 0.92 (t,  $J = 6.9$  Hz, 3H).  $^{13}\text{C}$  NMR (101 MHz,  $\text{CDCl}_3$ )  $\delta$  209.4, 139.5, 135.6, 125.4, 121.2, 121.2, 120.3, 115.1, 109.4, 44.5, 43.3, 31.5, 29.8, 27.4, 26.7, 22.5, 14.0, 12.3. HRMS (ESI): Exact mass calculated for  $\text{C}_{20}\text{H}_{29}\text{NO}$   $[\text{M}+\text{H}]^+$ : 300.2322, found: 300.2327.

### 1-(1-benzyl-2-methyl-1H-indol-3-yl)-2,2-dimethyl-1-propanone (3s)

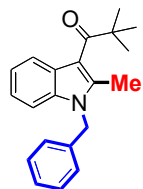

General procedure was followed using **1s** (68 mg, 23 mmol, 1.0 equiv.), **2** (140 mg, 1.15 mmol, 5 equiv.),  $\text{AgNTf}_2$  (15 mg, 20 mol%),  $[\text{IrCp}^*\text{Cl}_2]_2$  (8.2 mg, 5 mol%),  $\text{AgOAc}$  (76 mg, 0.46 mmol, 2 equiv), 1,2-DCE (1 mL), at  $115^\circ\text{C}$  for 23 h. Preparative thin layer chromatography was eluted using 90 mL petroleum ether and 10 mL acetone combination yielded **3s** (39 mg, 56%). Yellow liquid.

$^1\text{H}$  NMR (400 MHz,  $\text{Chloroform-d}$ )  $\delta$  7.35 – 7.26 (m, 5H), 7.22 – 7.17 (m, 2H), 7.02 (d,  $J = 6.7$  Hz, 2H), 5.37 (s, 2H), 2.45 (s, 3H), 1.43 (s, 9H).  $^{13}\text{C}$  NMR (101 MHz,  $\text{CDCl}_3$ )  $\delta$  209.83, 139.2, 136.8, 136.1, 128.9, 127.5, 125.9, 121.6, 121.1, 120.6, 115.7, 109.6, 46.5, 44.7, 27.4, 12.3. HRMS (ESI): Exact mass calculated for  $\text{C}_{21}\text{H}_{23}\text{NO}$   $[\text{M}+\text{H}]^+$ : 306.1861, found: 306.1858.

### 1-(1-(4-methylbenzyl)-2-methyl-1H-indol-3-yl)-2,2-dimethyl-1-propanone (3t)

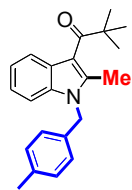

General procedure was followed using **1t** (70 mg, 23 mmol, 1.0 equiv.), **2** (140 mg, 1.15 mmol, 5 equiv.),  $\text{AgNTf}_2$  (15 mg, 20 mol%),  $[\text{IrCp}^*\text{Cl}_2]_2$  (8.2 mg, 5 mol%),  $\text{AgOAc}$  (76 mg, 0.46 mmol, 2 equiv), 1,2-DCE (1 mL), at  $115^\circ\text{C}$  for 23 h. Preparative thin layer chromatography was eluted using 90 mL petroleum ether and 10 mL acetone combination yielded **3t** (54 mg, 74%). Brown liquid.  $^1\text{H}$  NMR (400 MHz,  $\text{Chloroform-d}$ )  $\delta$  7.75 – 7.69 (m, 1H), 7.27 (dt,  $J = 2.8, 1.4$  Hz, 1H), 7.22 – 7.16 (m, 2H), 7.12 (d,  $J = 7.9$  Hz, 3H), 6.92 (d,  $J = 7.7$  Hz, 3H), 5.33 (s, 2H), 2.45 (s, 3H), 2.34 (s, 4H), 1.42 (s, 9H).  $^{13}\text{C}$  NMR (101 MHz,  $\text{CDCl}_3$ )  $\delta$  209.8, 139.3, 137.2, 136.1, 133.7, 129.5, 125.9, 125.6, 121.6, 121.1, 120.6, 115.6, 109.7, 46.3, 44.7, 27.4, 21.0, 12.3. HRMS (ESI): Exact mass calculated for  $\text{C}_{22}\text{H}_{25}\text{NO}$   $[\text{M}+\text{H}]^+$ : 320.2010, found: 320.2014.

### 1-(1-(2,6-dichloro-2-methylbenzyl)-4-methyl-1H-indol-3-yl)-2,2-dimethyl-1-propanone (3u)

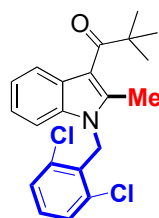

General procedure was followed using **1u** (63 mg, 23 mmol, 1.0 equiv.), **2** (140 mg, 1.15 mmol, 5 equiv.),  $\text{AgNTf}_2$  (15 mg, 20 mol%),  $[\text{IrCp}^*\text{Cl}_2]_2$  (8.2 mg, 5 mol%),  $\text{AgOAc}$  (76 mg, 0.46 mmol, 2 equiv), 1,2-DCE (1 mL), at  $115^\circ\text{C}$  for 23 h. Preparative thin layer chromatography was eluted using 90 mL petroleum ether and 10 mL acetone combination yielded **3u** (44 mg, 51%). Yellow solid.

$^1\text{H}$  NMR (400 MHz,  $\text{Chloroform-d}$ )  $\delta$  7.58 (dd,  $J = 8.3, 1.6$  Hz, 1H), 7.36 (d,  $J = 7.6$  Hz, 2H), 7.30 – 7.20 (m, 1H), 7.15 – 7.07 (m, 3H), 5.58 (s, 2H), 2.45 (s, 3H), 1.36 (s, 9H).  $^{13}\text{C}$  NMR (101 MHz,  $\text{CDCl}_3$ )  $\delta$  210.9, 138.6, 136.2, 135.9, 131.5, 129.8, 129.1, 125.8, 121.3, 120.7, 120.2, 116.1, 110.0, 45.0, 43.8, 27.4, 12.7. HRMS (ESI): Exact mass calculated for  $\text{C}_{21}\text{H}_{21}\text{Cl}_2\text{NO}$   $[\text{M}+\text{H}]^+$ : 374.1073, found: 374.1078.

### 1-(1-phenyl-2-methyl-1H-indol-3-yl)-2,2-dimethyl-1-propanone (3v)

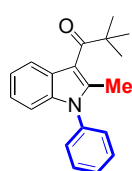

General procedure was followed using **1v** (50 mg, 18 mmol, 1.0 equiv.), **2** (100 mg, 5 equiv.),  $\text{AgNTf}_2$  (20 mg, 20 mol%),  $[\text{IrCp}^*\text{Cl}_2]_2$  (7.5 mg, 5 mol%),  $\text{AgOAc}$  (60 mg, 2 equiv), 1,2-DCE (1 mL), at  $115^\circ\text{C}$  for 23 h. Preparative thin layer chromatography was eluted using 90 mL petroleum ether and 10 mL acetone combination yielded **3v** (44 mg, 85%).

Yellow liquid.  $^1\text{H}$  NMR (400 MHz,  $\text{Chloroform-d}$ )  $\delta$  7.61 (d,  $J = 8.0$  Hz, 1H), 7.50 – 7.38 (m, 4H), 7.27 – 7.22 (m, 2H), 7.09 (ddd,  $J = 8.1, 7.0, 1.3$  Hz, 1H), 7.05 – 7.00 (m, 1H), 6.94 (dt,  $J = 8.1, 1.0$  Hz, 1H), 2.23 (s, 3H), 1.33 (s, 9H).  $^{13}\text{C}$  NMR (101 MHz,  $\text{CDCl}_3$ )  $\delta$  209.7, 139.6, 137.3, 136.9, 129.7, 128.5, 128.3, 125.5, 121.8, 121.0, 120.9, 116.0, 110.5, 44.7, 27.4, 13.3. HRMS (ESI): Exact mass calculated for  $\text{C}_{20}\text{H}_{21}\text{NO}$   $[\text{M}+\text{Na}]^+$ : 314.1521, found: 314.1525.

### 1-(1-(2-methoxyphenyl)-2-methyl-1H-indol-3-yl)-2,2-dimethyl-1-propanone (3w)

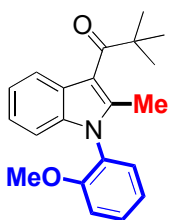

General procedure was followed using **1v** (56 mg, 16 mmol, 1.0 equiv.), **2** (97 mg, 5 equiv.), AgNTf<sub>2</sub> (12 mg, 20 mol%), [IrCp\*Cl<sub>2</sub>]<sub>2</sub> (6.3 mg, 5 mol%), AgOAc (53 mg, 2 equiv), 1,2-DCE (1 mL), at 115°C for 23 h. Preparative thin layer chromatography was eluted using 90 mL petroleum ether and 10 mL acetone combination yielded **3w** (28 mg, 55%).

Yellow liquid. <sup>1</sup>H NMR (400 MHz, Chloroform-*d*) δ 7.72 (d, *J* = 8.0 Hz, 1H), 7.51 – 7.45 (m, 1H), 7.29 – 7.24 (m, 1H), 7.19 – 7.13 (m, 1H), 7.13 – 7.06 (m, 4H), 6.91 – 6.87 (m, 1H), 3.71 (s, 3H), 2.26 (s, 3H), 1.42 (s, 9H). <sup>13</sup>C NMR (101 MHz, CDCl<sub>3</sub>) δ 209.0, 156.0, 141.7, 137.3, 130.3, 130.2, 125.5, 125.3, 121.4, 121.0, 120.9, 120.7, 115.3, 112.3, 110.4, 55.6, 44.6, 27.4, 13.0. HRMS (ESI): Exact mass calculated for C<sub>21</sub>H<sub>23</sub>NO<sub>2</sub> [M+Na]<sup>+</sup>: 344.1646, found: 344.1641.

Copies of spectra

3a, <sup>1</sup>H NMR, CDCl<sub>3</sub>, 400 MHz

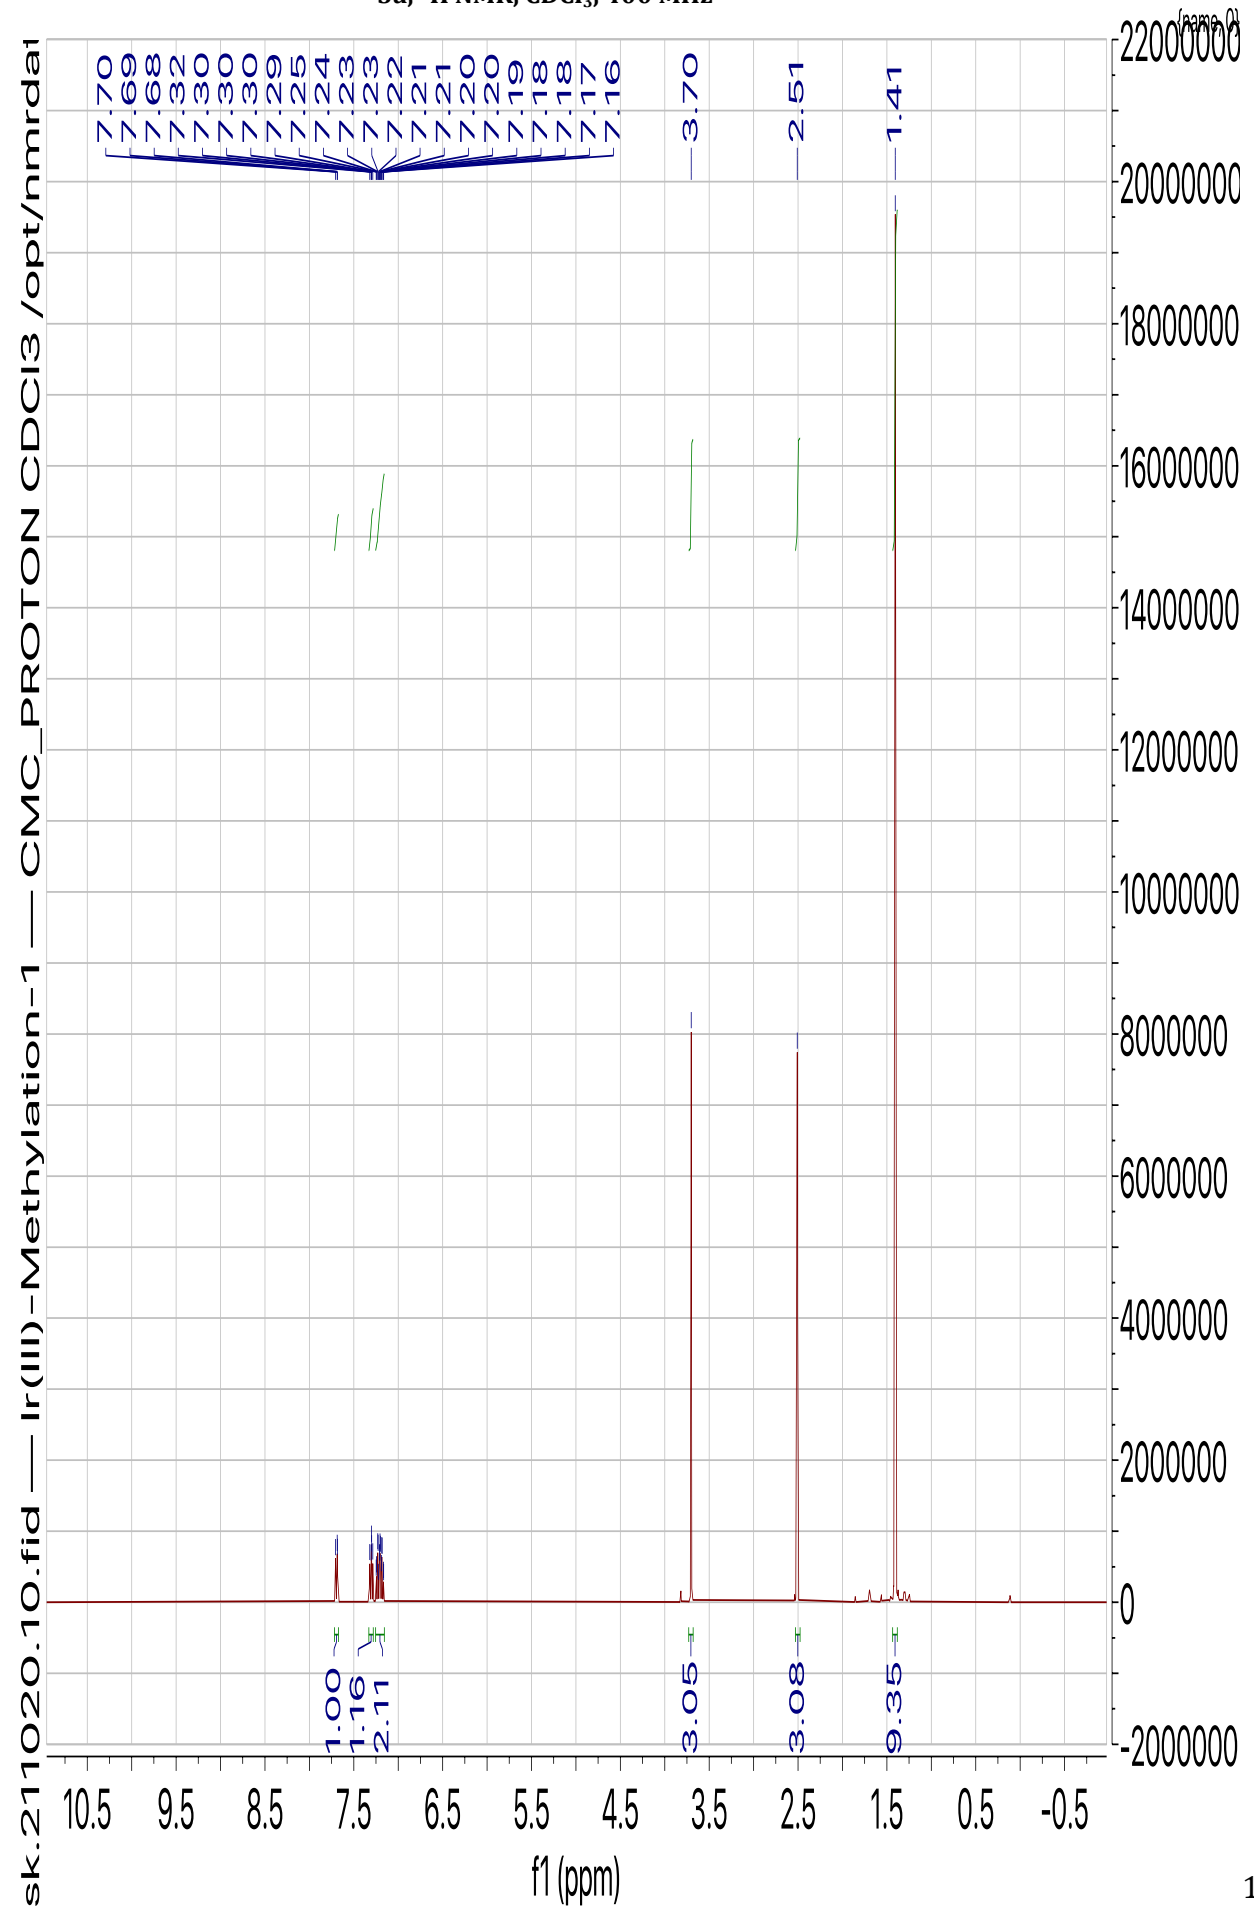



3a, <sup>13</sup>C NMR (101 MHz, CDCl<sub>3</sub>)

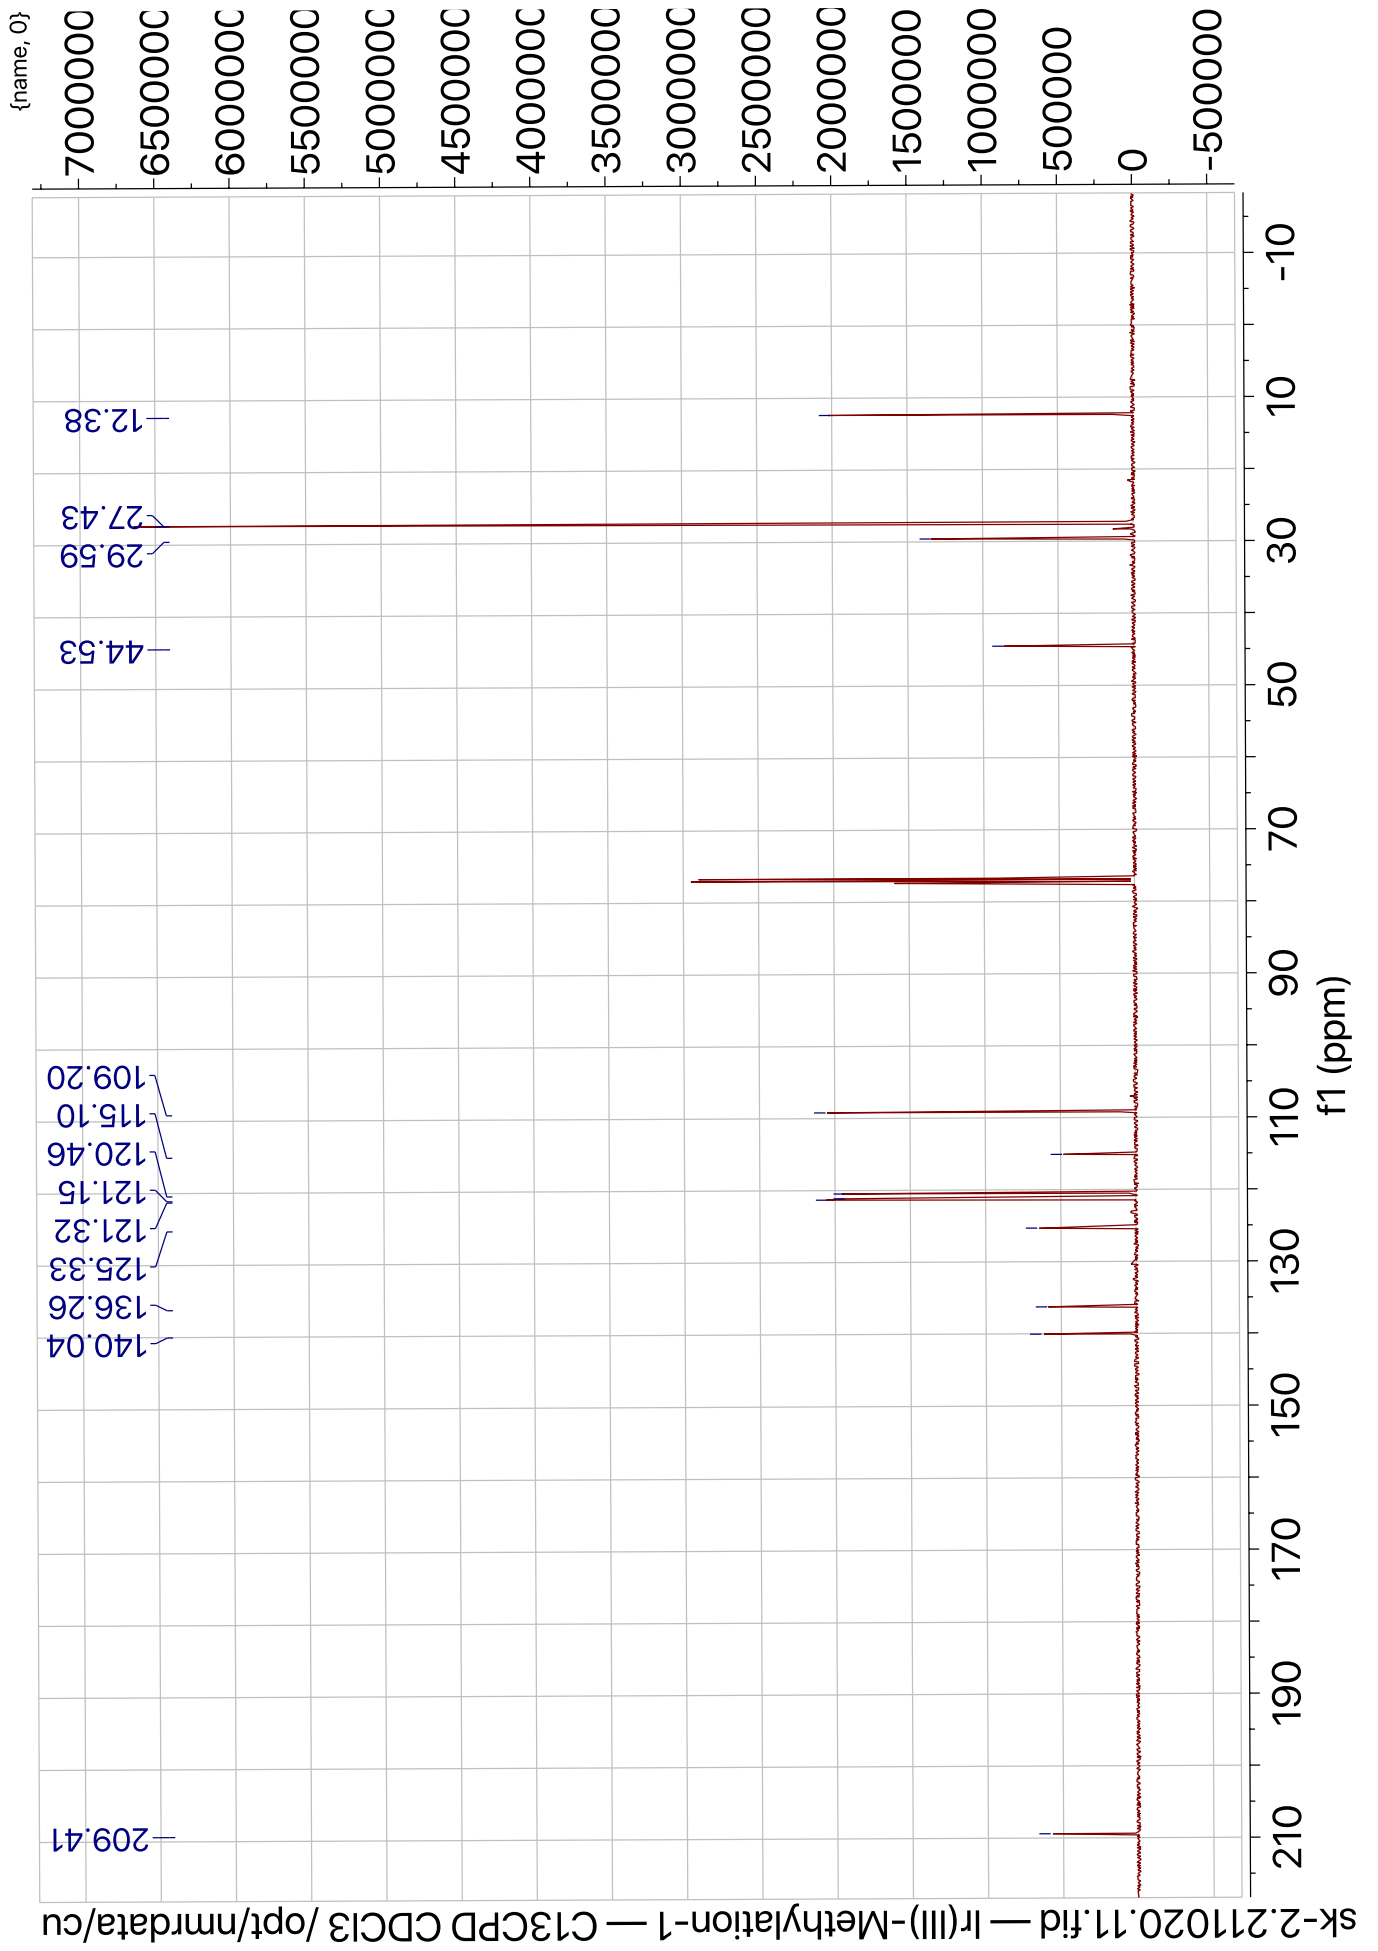

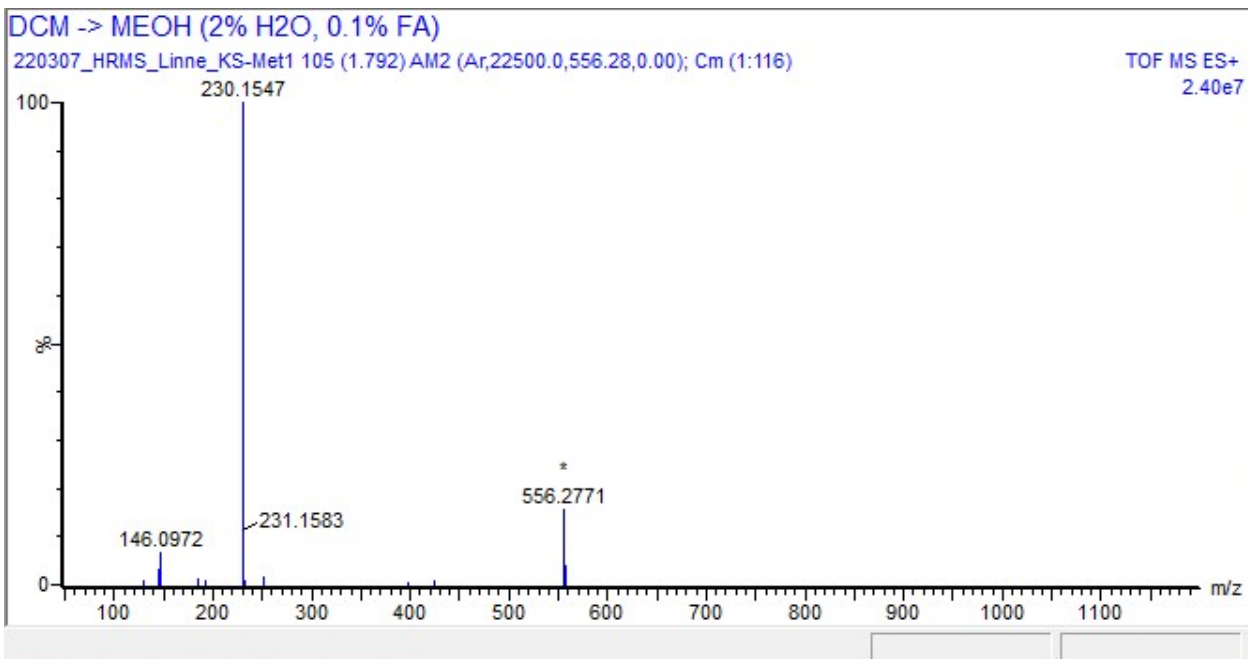

### Single Mass Analysis

Tolerance = 2.0 mDa / DBE: min = -1.5, max = 100.0

Element prediction: Off

Number of isotope peaks used for i-FIT = 2

Monoisotopic Mass, Even Electron Ions

62 formula(e) evaluated with 1 results within limits (all results (up to 1000) for each mass)

Elements Used:

C: 0-60      H: 0-100      N: 0-3      O: 0-4

| Mass     | Calc. Mass | mDa | PPM | DBE | Formula                             | i-FIT | i-FIT Norm | Fit Conf % | C  | H  | N | O |
|----------|------------|-----|-----|-----|-------------------------------------|-------|------------|------------|----|----|---|---|
| 230.1547 | 230.1545   | 0.2 | 0.9 | 6.5 | C <sub>15</sub> H <sub>20</sub> N O | 54.1  | n/a        | n/a        | 15 | 20 | 1 | 1 |

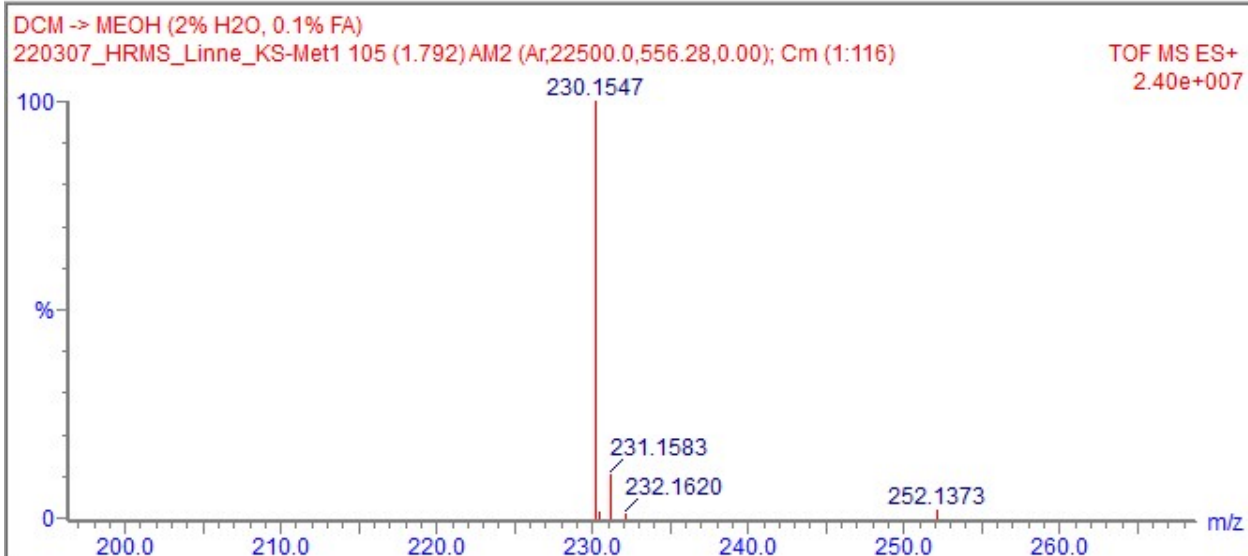

HRMS spectra of **3a**

3b, <sup>1</sup>H NMR, CDCl<sub>3</sub>, 400 MHz

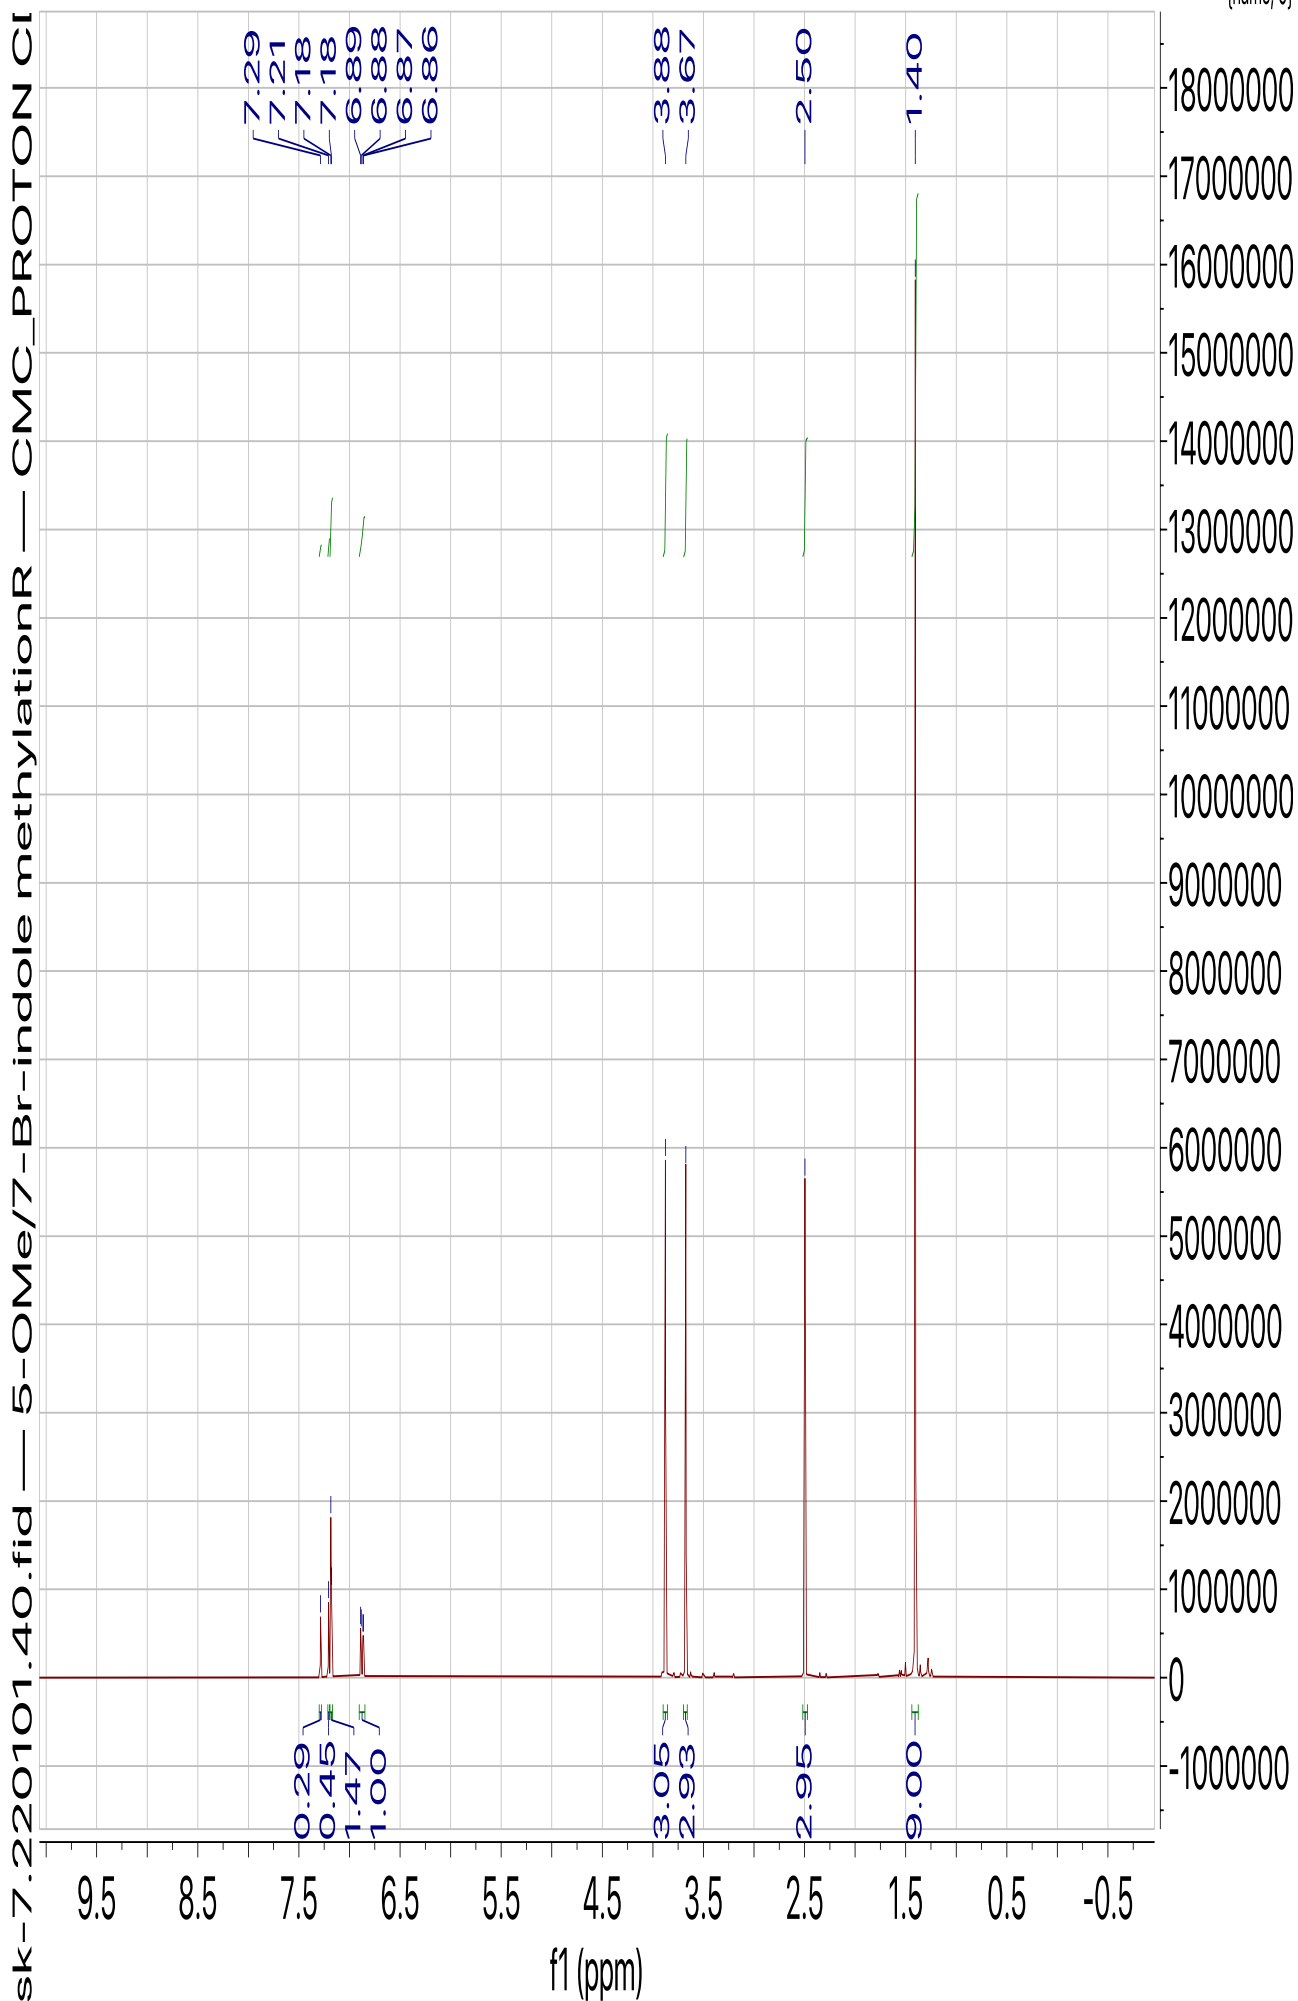

3b, <sup>13</sup>C NMR (101 MHz, CDCl<sub>3</sub>)

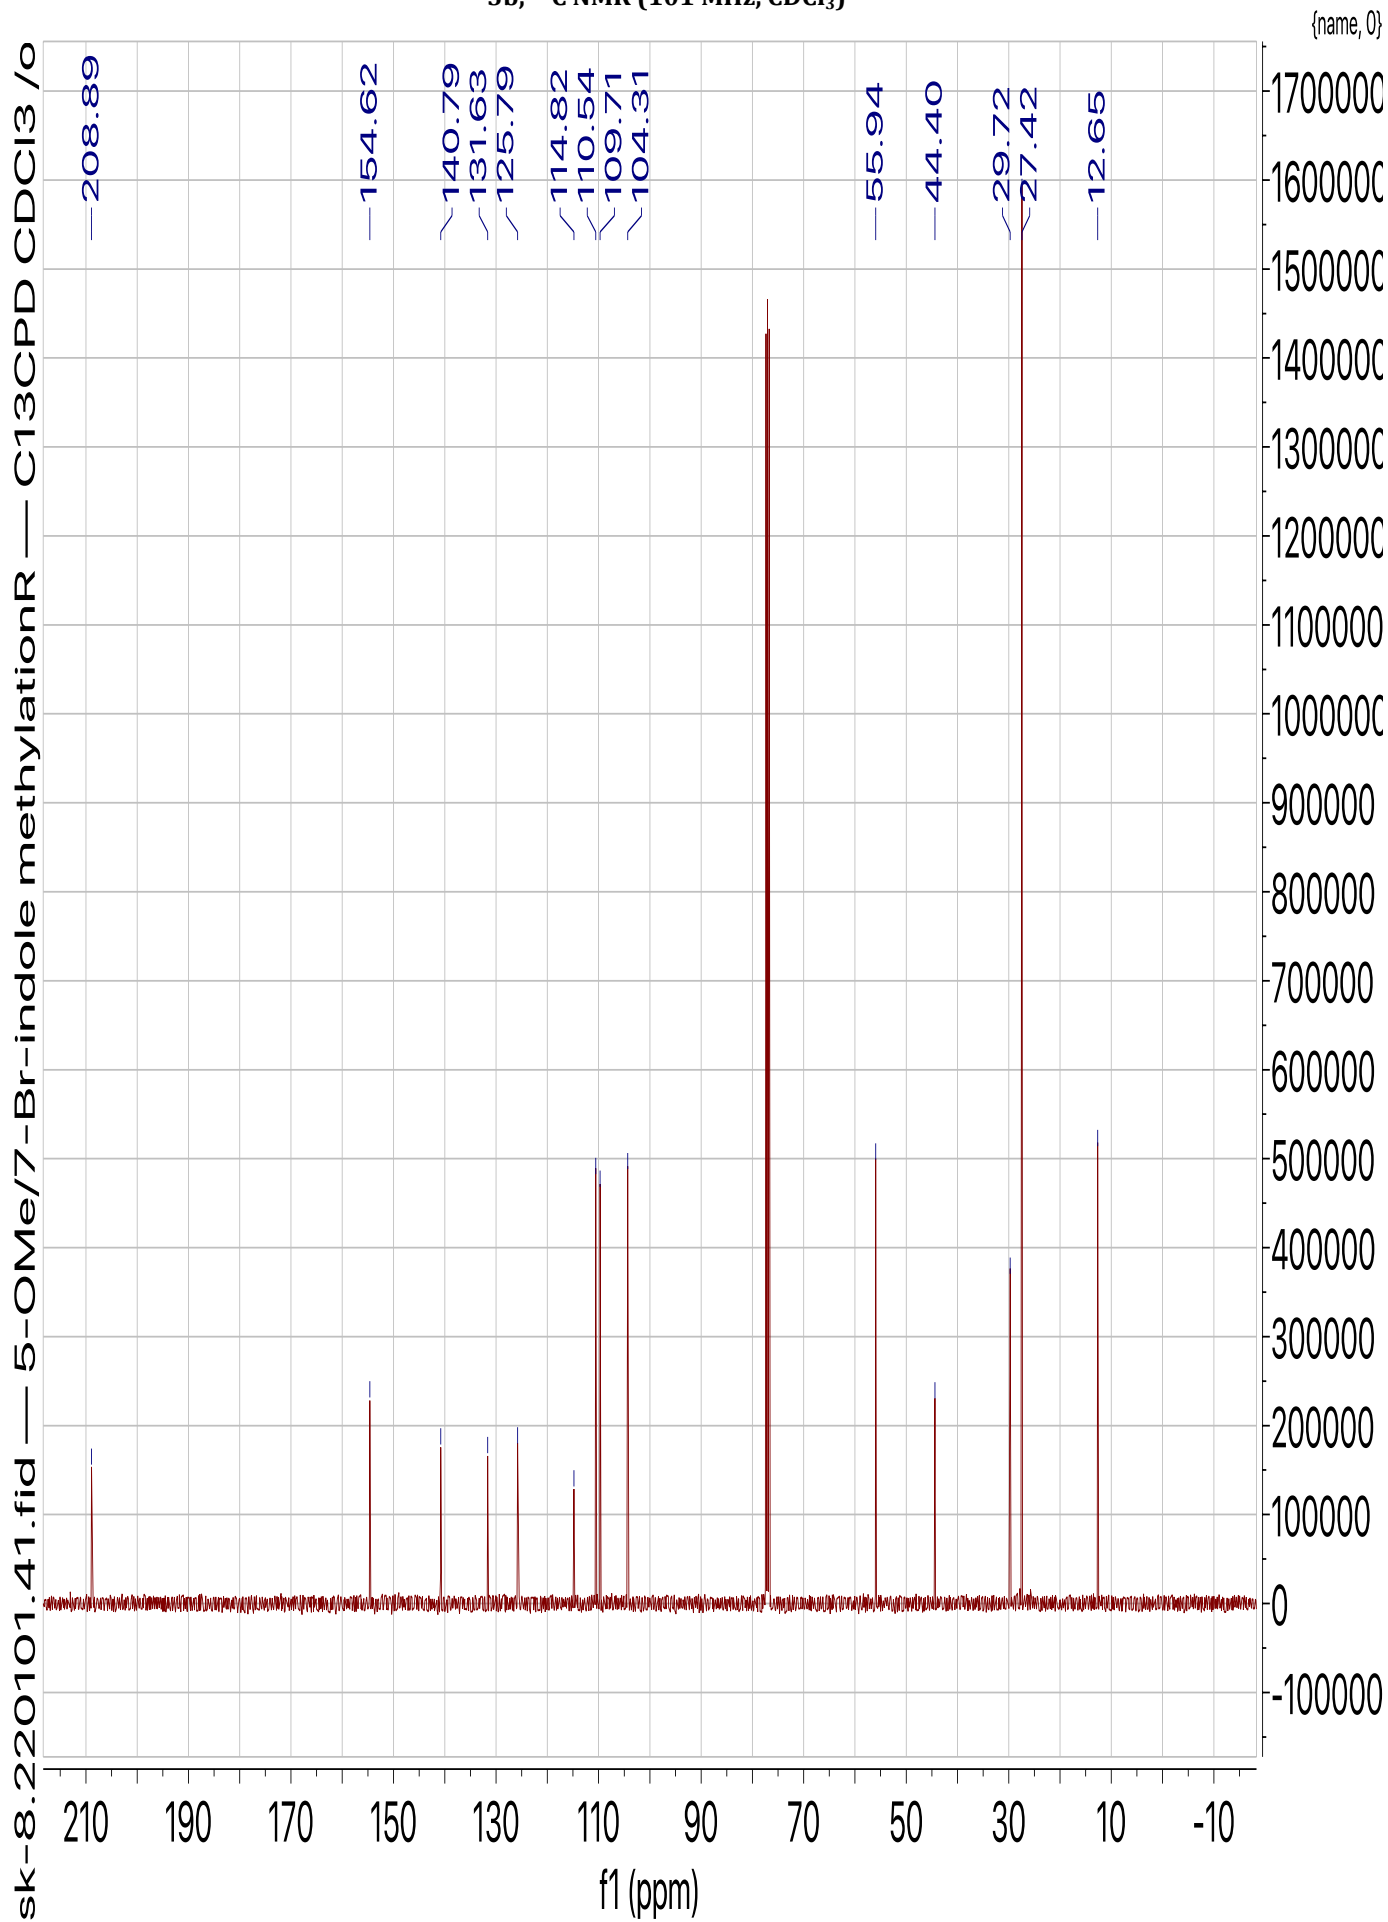

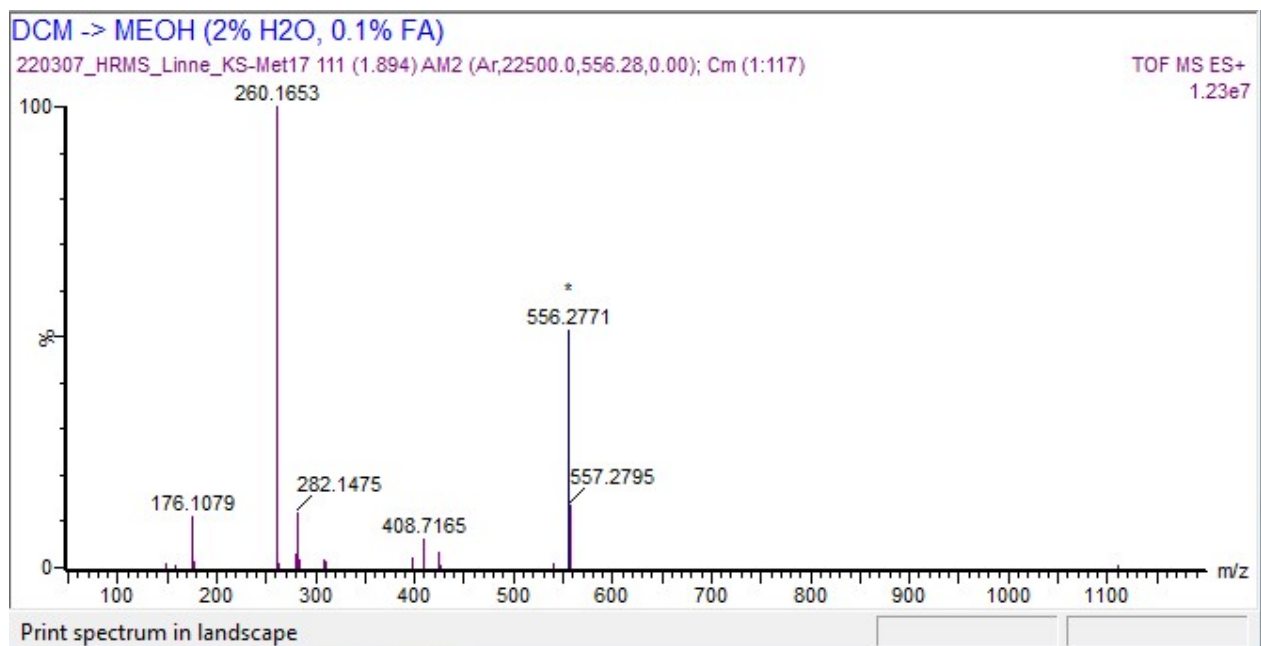

### Single Mass Analysis

Tolerance = 2.0 mDa / DBE: min = -1.5, max = 100.0

Element prediction: Off

Number of isotope peaks used for i-FIT = 2

Monoisotopic Mass, Even Electron Ions

183 formula(e) evaluated with 1 results within limits (all results (up to 1000) for each mass)

Elements Used:

C: 0-60      H: 0-100      N: 0-3      O: 0-4      Cl: 0-2

| Mass     | Calc. Mass | mDa | PPM | DBE | Formula      | i-FIT | i-FIT Norm | Fit Conf % | C  | H  | N | O | Cl |
|----------|------------|-----|-----|-----|--------------|-------|------------|------------|----|----|---|---|----|
| 260.1653 | 260.1651   | 0.2 | 0.8 | 6.5 | C16 H22 N O2 | 50.6  | n/a        | n/a        | 16 | 22 | 1 | 2 |    |

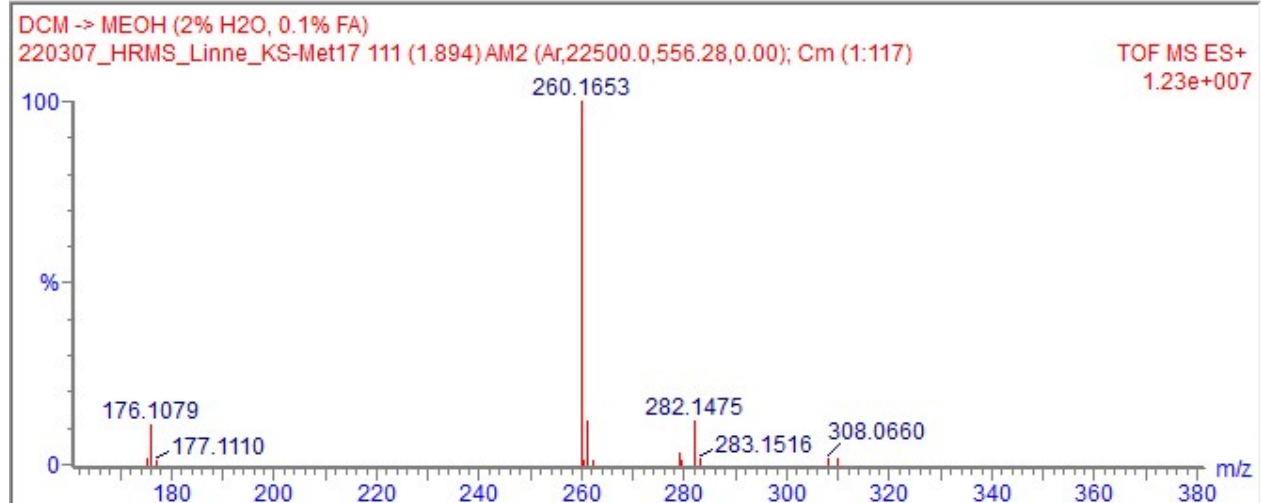

HRMS spectra of **3b**

3c, <sup>1</sup>H NMR, CDCl<sub>3</sub>, 400 MHz

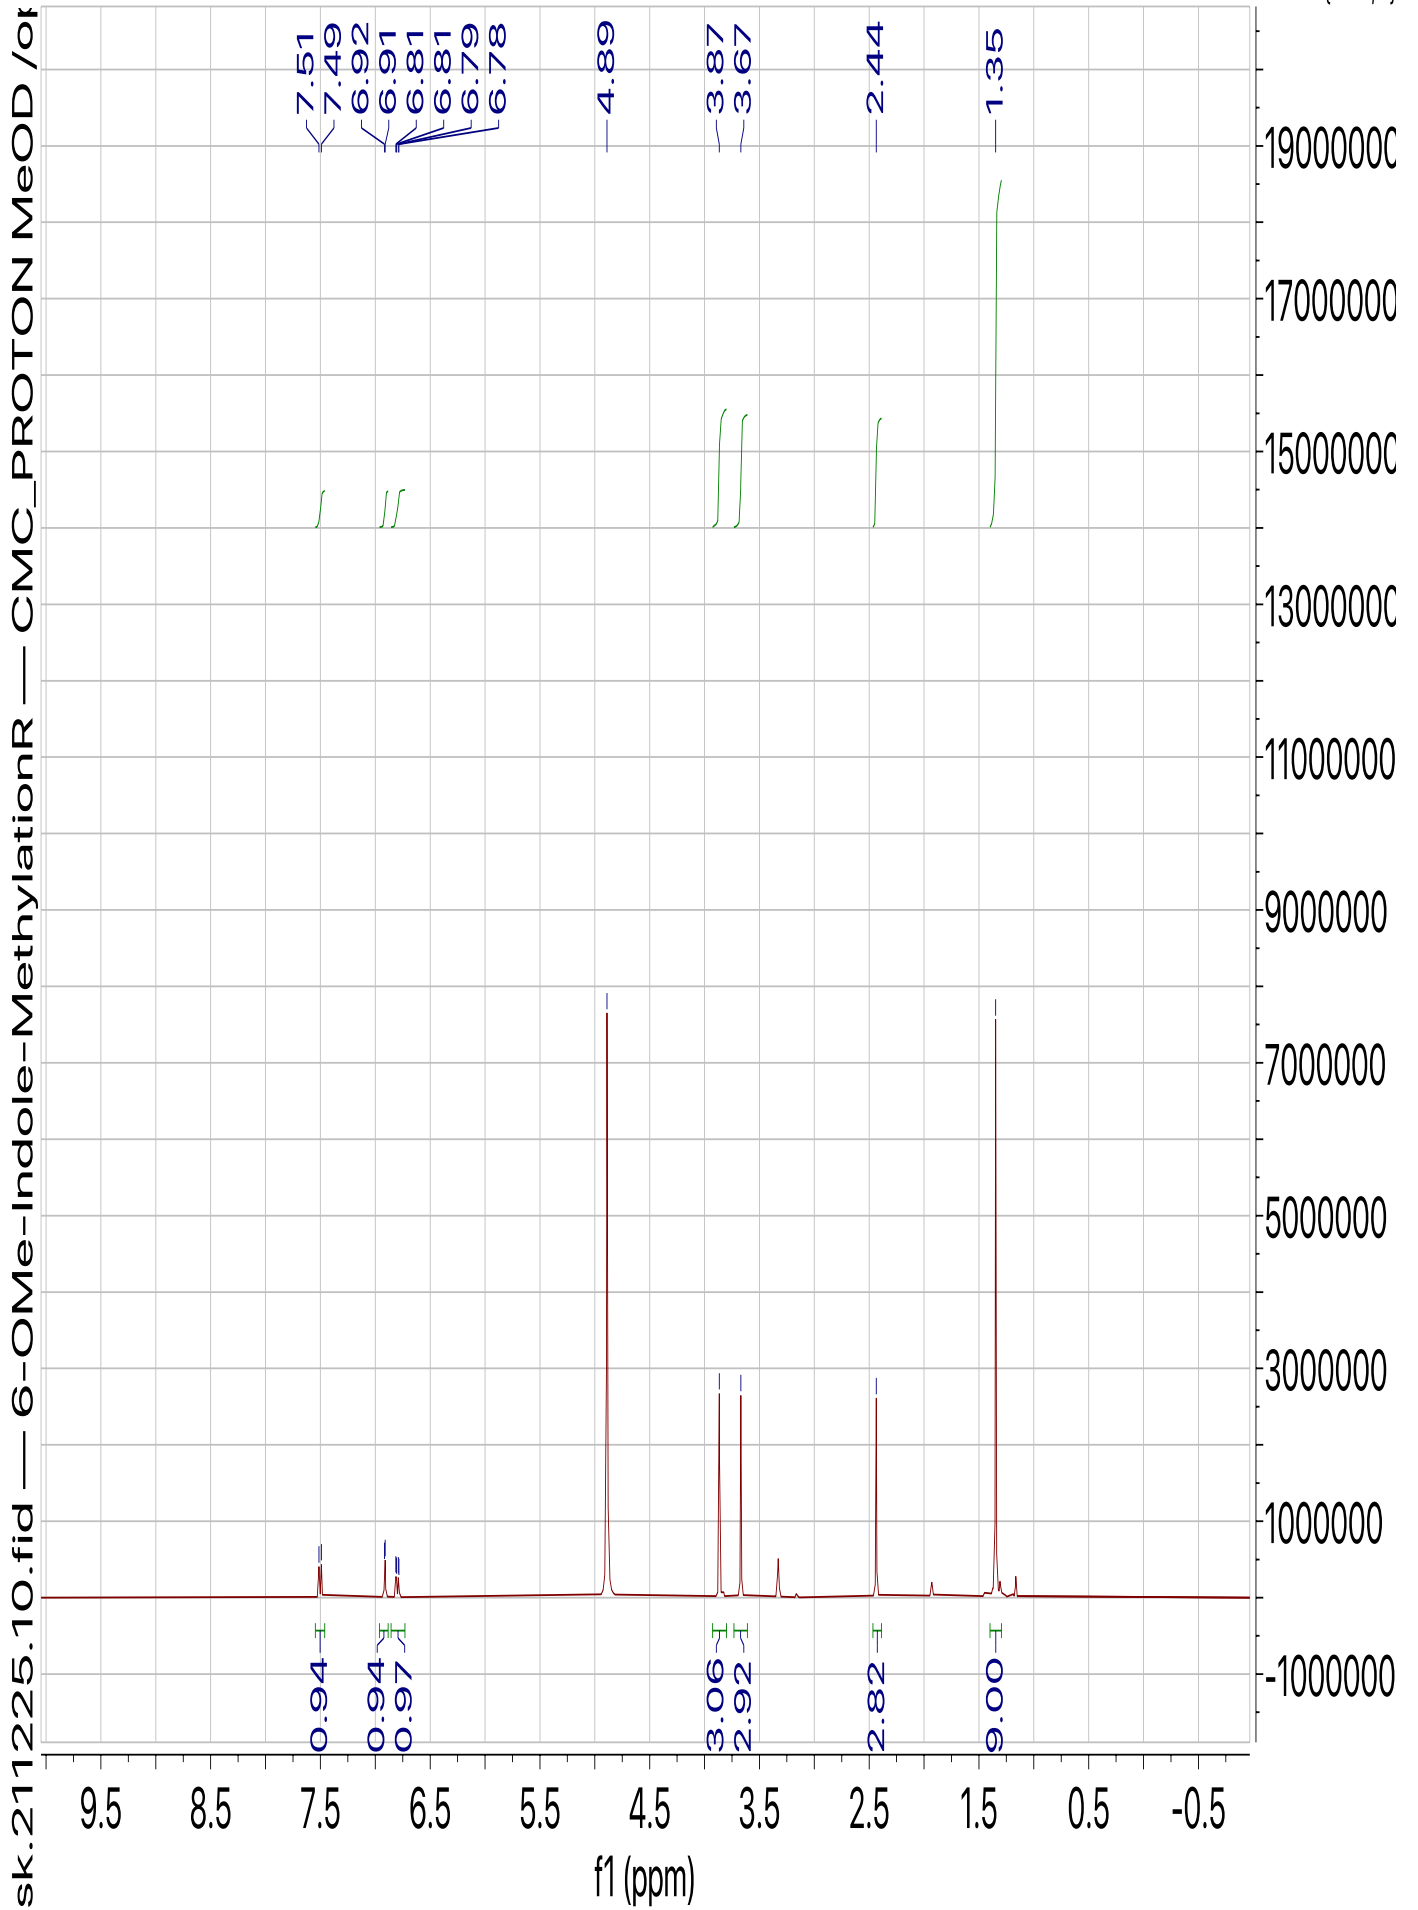

3c, <sup>13</sup>C NMR (101 MHz, CDCl<sub>3</sub>)

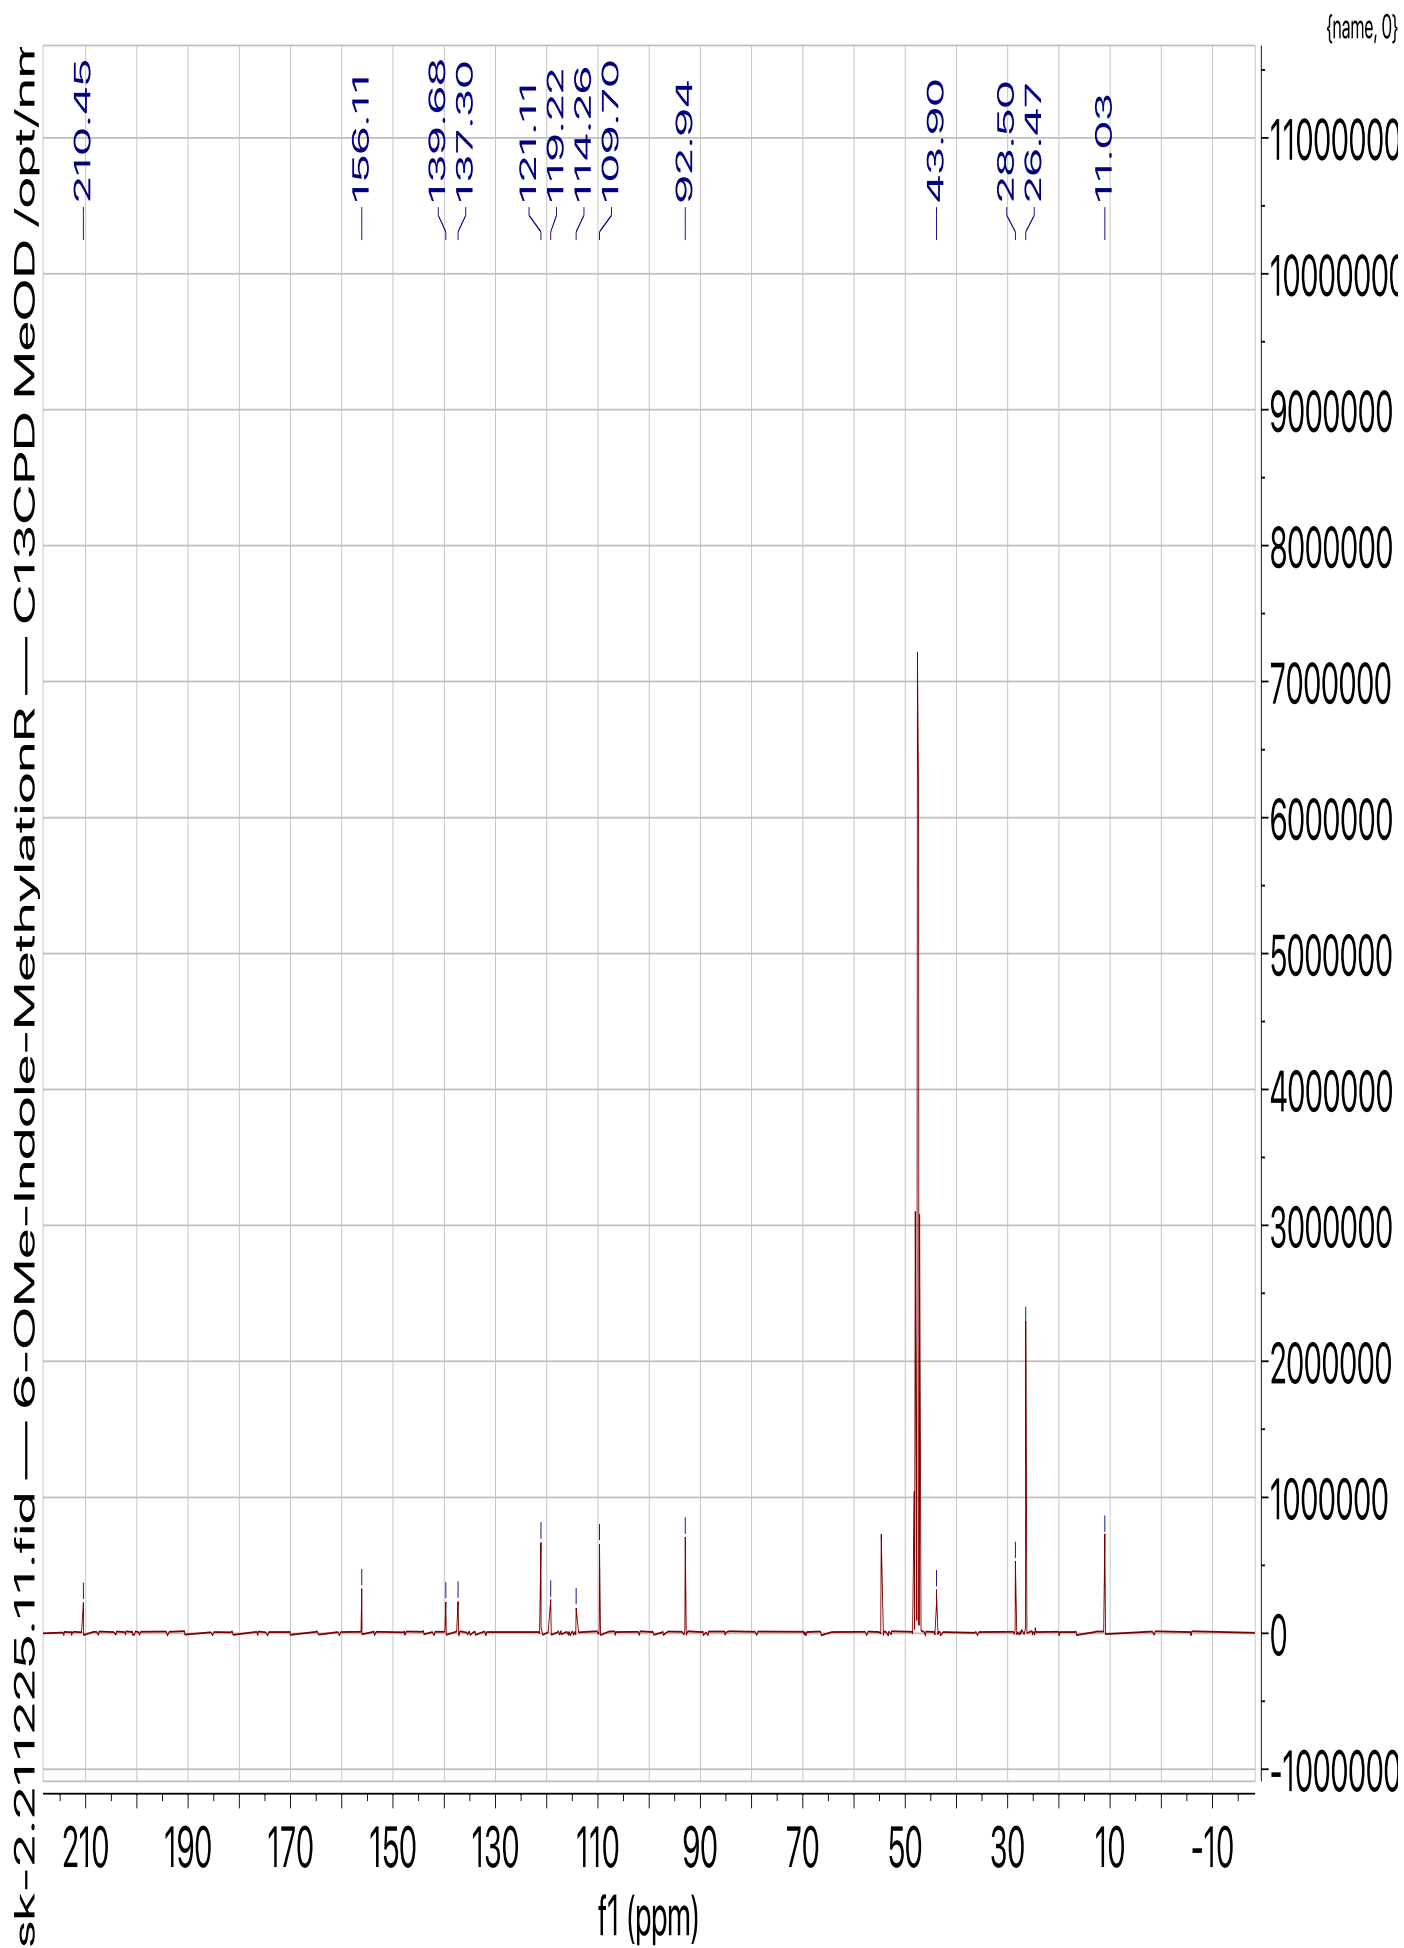

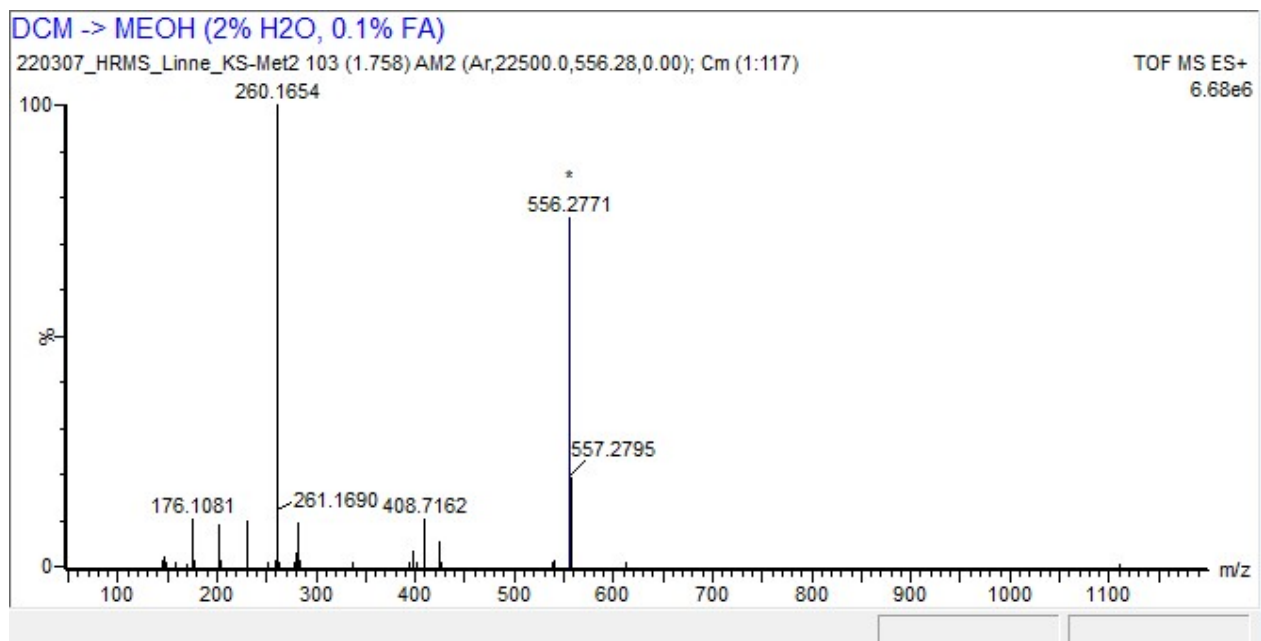

### Single Mass Analysis

Tolerance = 2.0 mDa / DBE: min = -1.5, max = 100.0

Element prediction: Off

Number of isotope peaks used for i-FIT = 2

Monoisotopic Mass, Even Electron Ions

69 formula(e) evaluated with 1 results within limits (all results (up to 1000) for each mass)

Elements Used:

C: 0-60      H: 0-100      N: 0-3      O: 0-4

| Mass     | Calc. Mass | mDa | PPM | DBE | Formula                                          | i-FIT | i-FIT Norm | Fit Conf % | C  | H  | N | O |
|----------|------------|-----|-----|-----|--------------------------------------------------|-------|------------|------------|----|----|---|---|
| 260.1654 | 260.1651   | 0.3 | 1.2 | 6.5 | C <sub>16</sub> H <sub>22</sub> N O <sub>2</sub> | 47.1  | n/a        | n/a        | 16 | 22 | 1 | 2 |

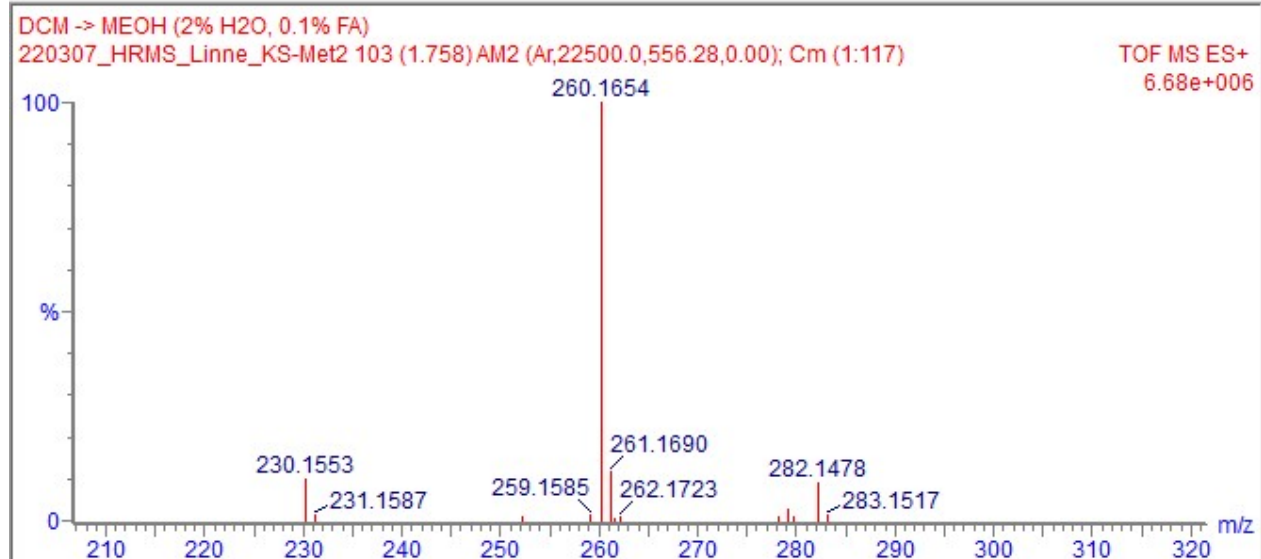

HRMS spectra of **3c**



3d, <sup>1</sup>H NMR, CDCl<sub>3</sub>, 400 MHz

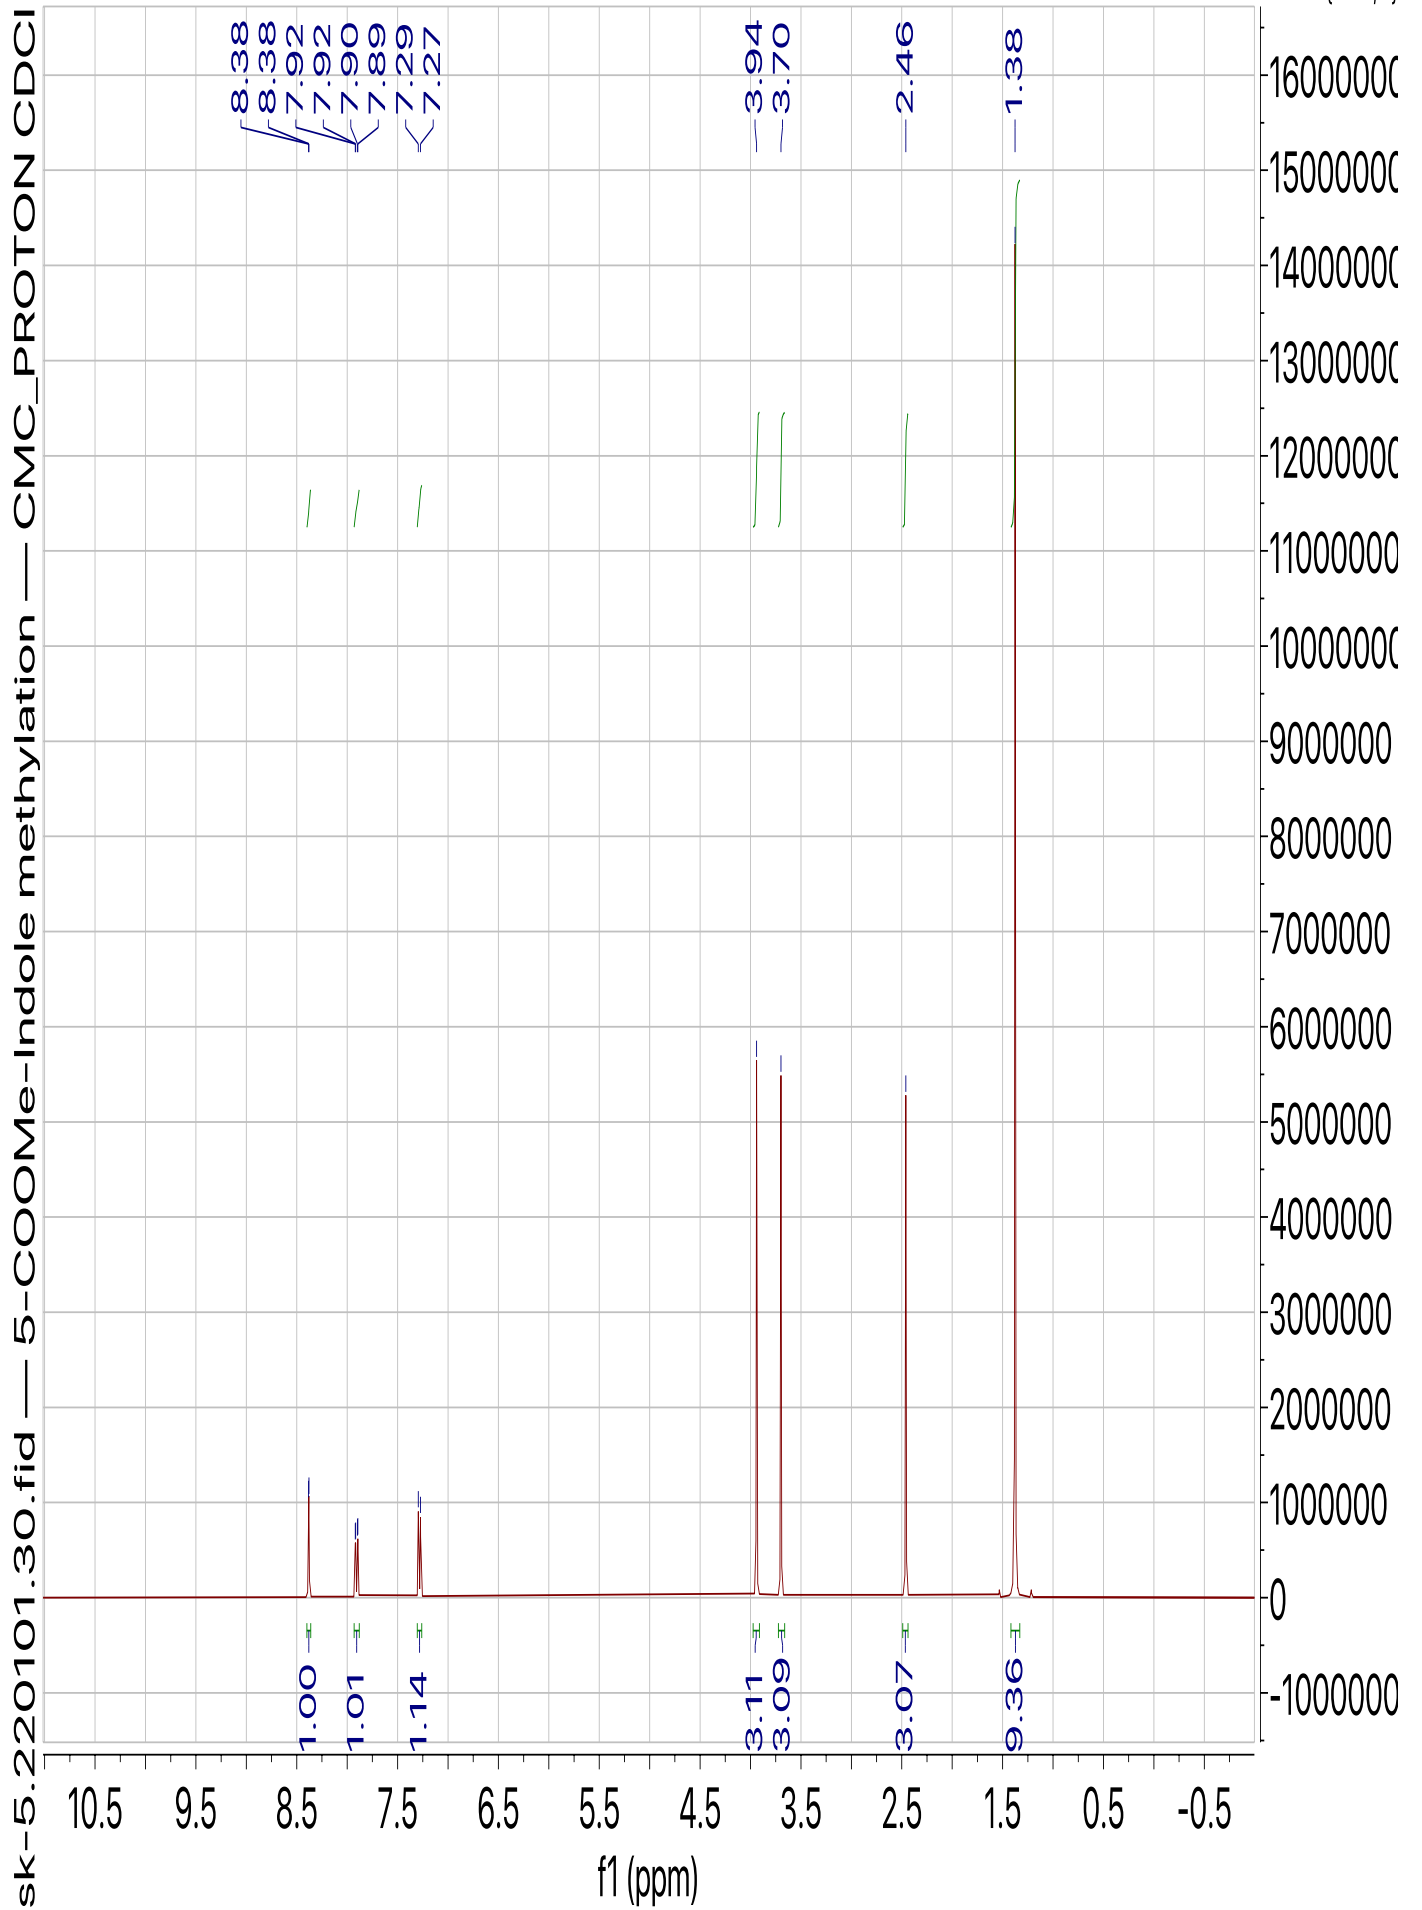

3d, <sup>13</sup>C NMR (101 MHz, CDCl<sub>3</sub>)

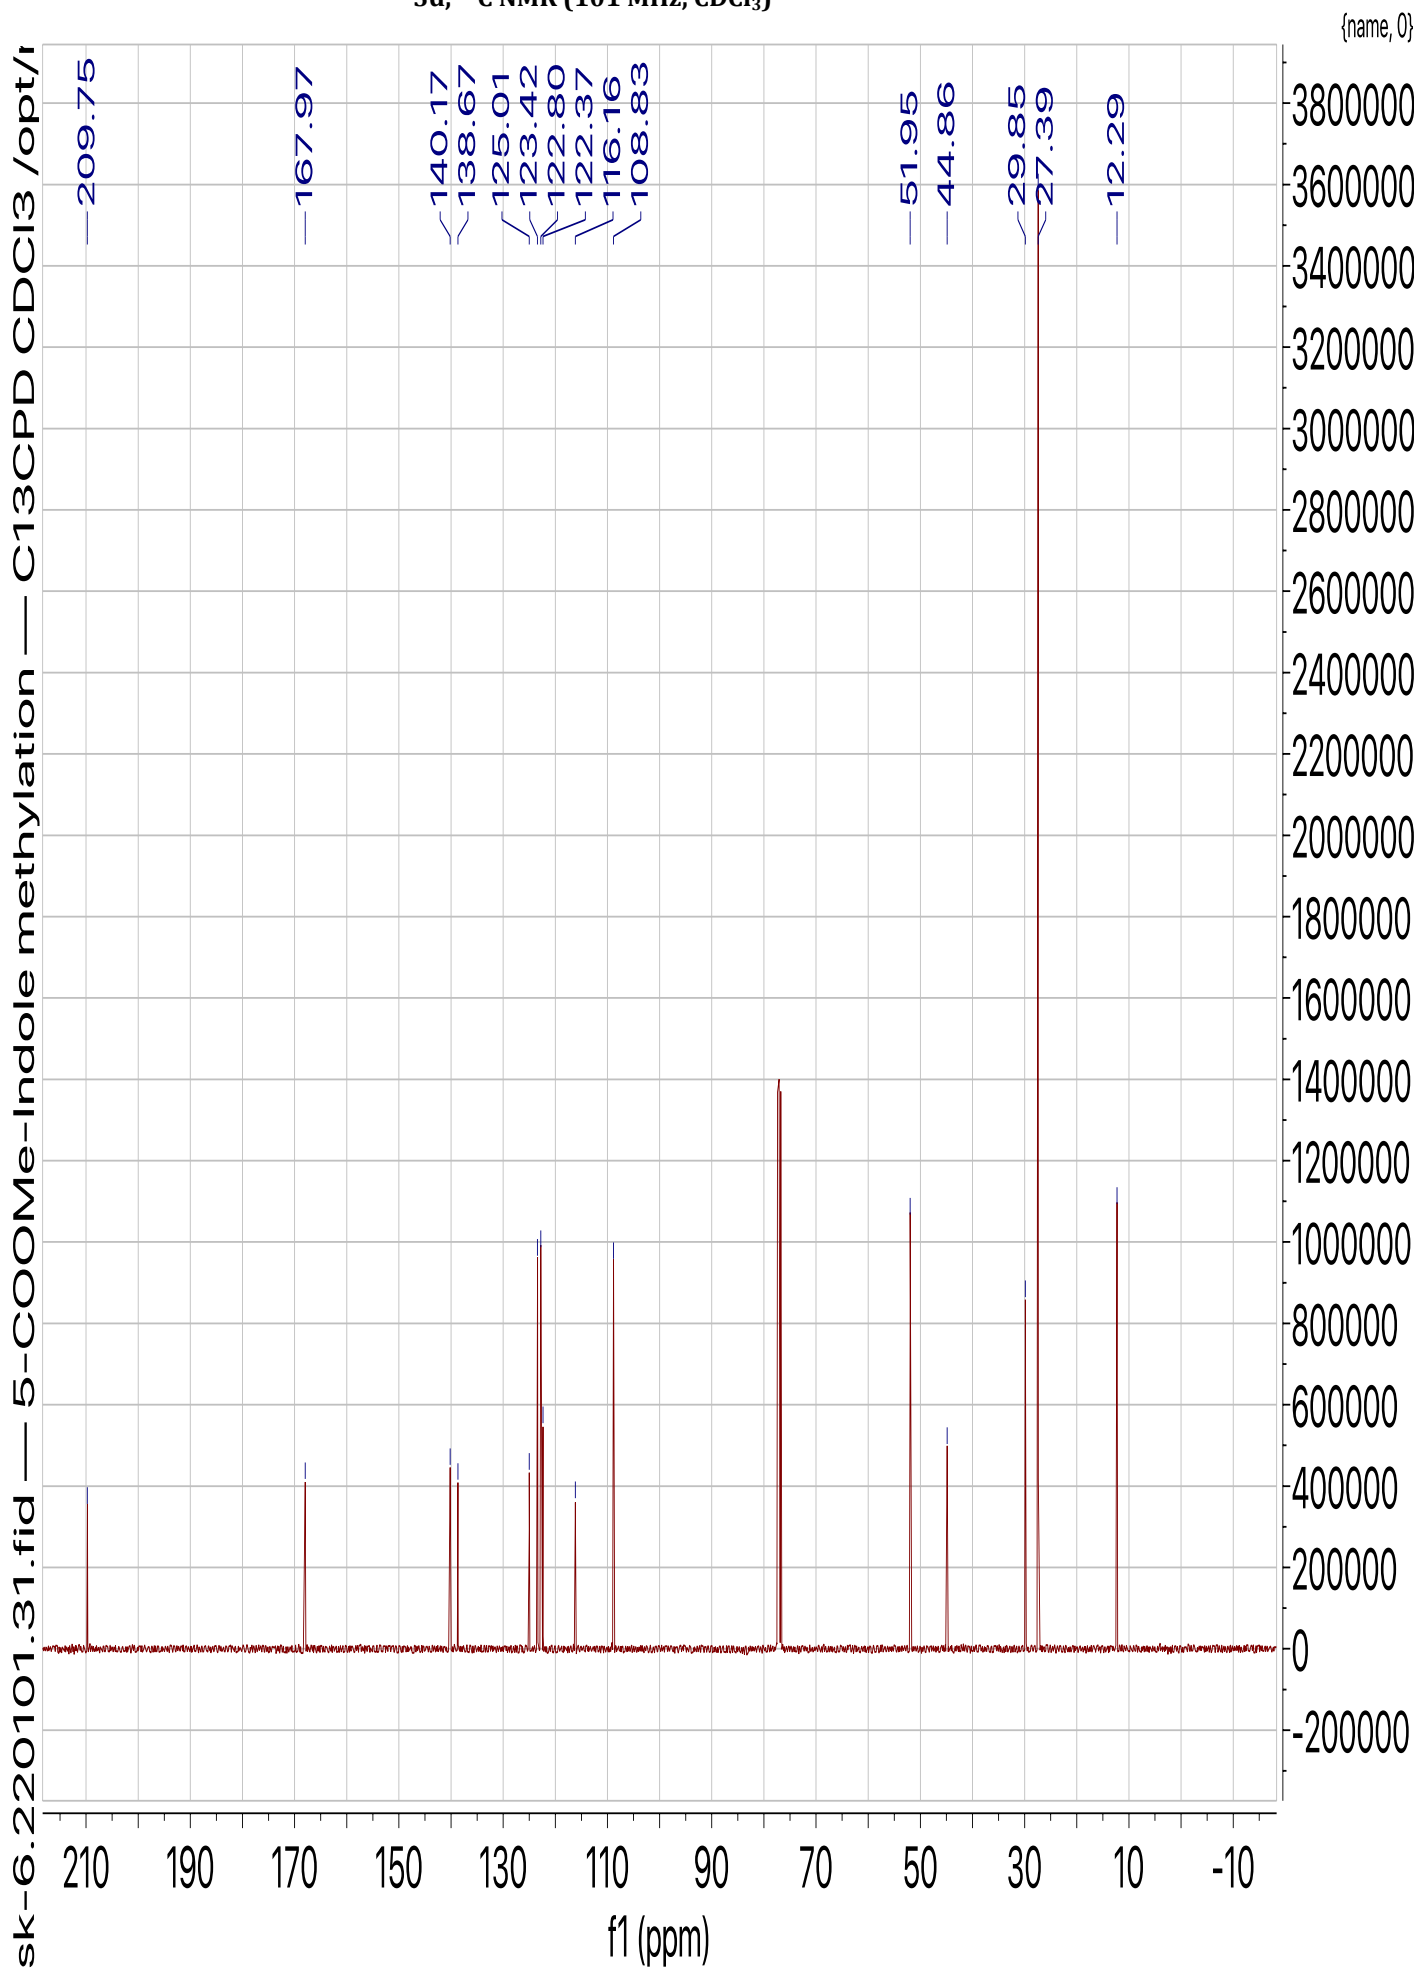

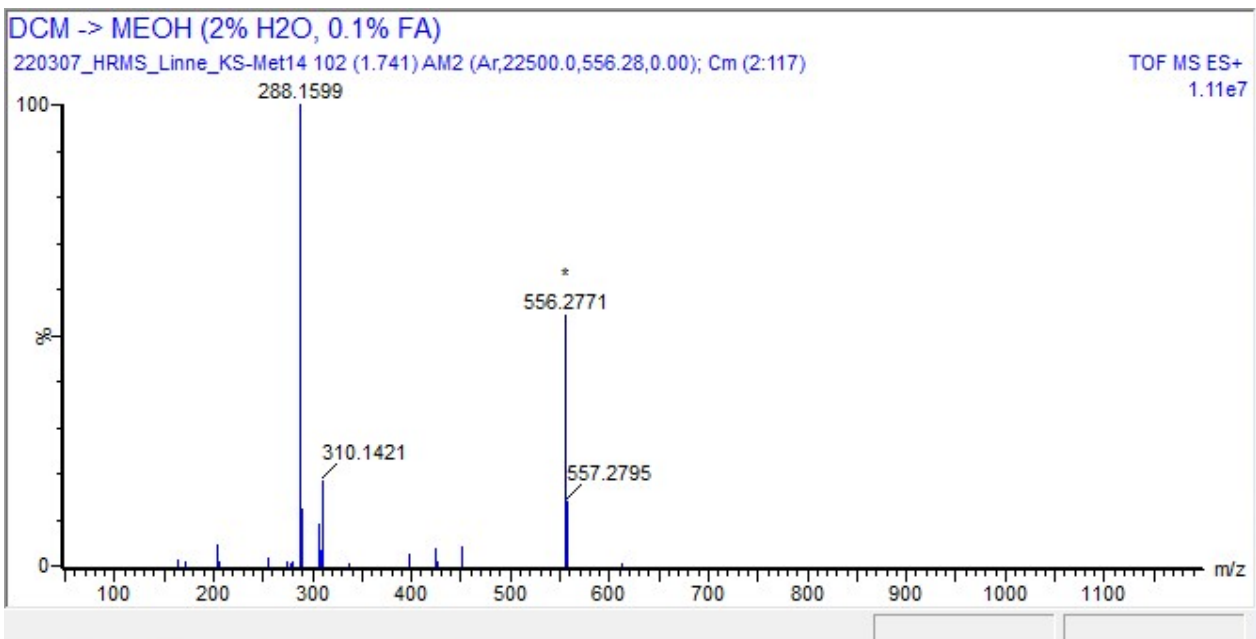

### Single Mass Analysis

Tolerance = 2.0 mDa / DBE: min = -1.5, max = 100.0

Element prediction: Off

Number of isotope peaks used for i-FIT = 2

Monoisotopic Mass, Even Electron Ions

75 formula(e) evaluated with 1 results within limits (all results (up to 1000) for each mass)

Elements Used:

C: 0-60      H: 0-100      N: 0-3      O: 0-4

| Mass     | Calc. Mass | mDa  | PPM  | DBE | Formula                                                       | i-FIT | i-FIT Nor... | Fit Conf % | C  | H  | N | O |
|----------|------------|------|------|-----|---------------------------------------------------------------|-------|--------------|------------|----|----|---|---|
| 288.1599 | 288.1600   | -0.1 | -0.3 | 7.5 | C <sub>17</sub> H <sub>22</sub> N <sub>1</sub> O <sub>3</sub> | 50.3  | n/a          | n/a        | 17 | 22 | 1 | 3 |

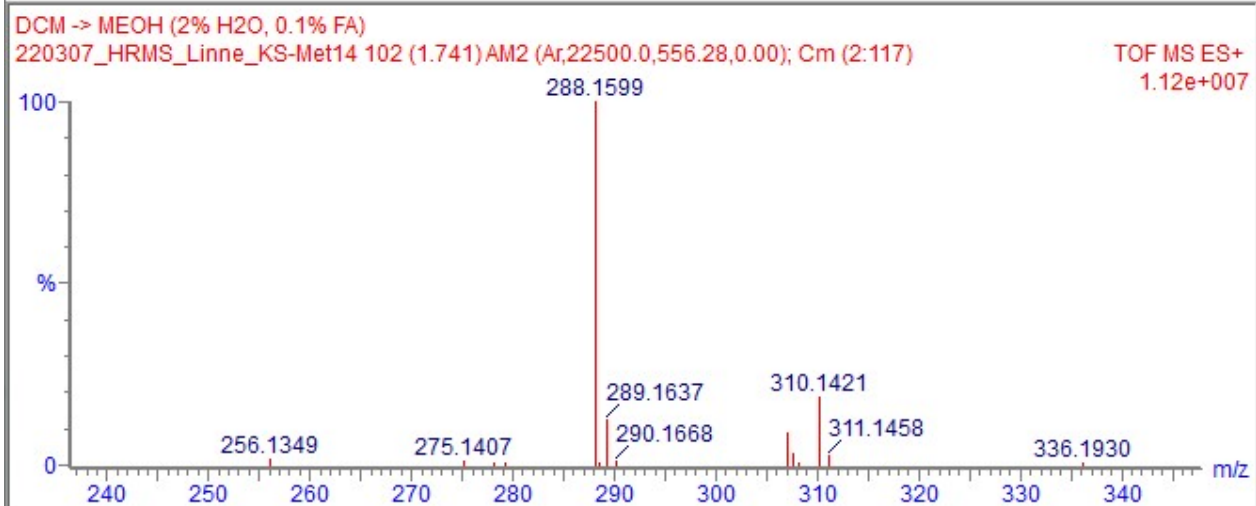

HRMS spectra of **3d**

3e, <sup>1</sup>H NMR, CDCl<sub>3</sub>, 400 MHz

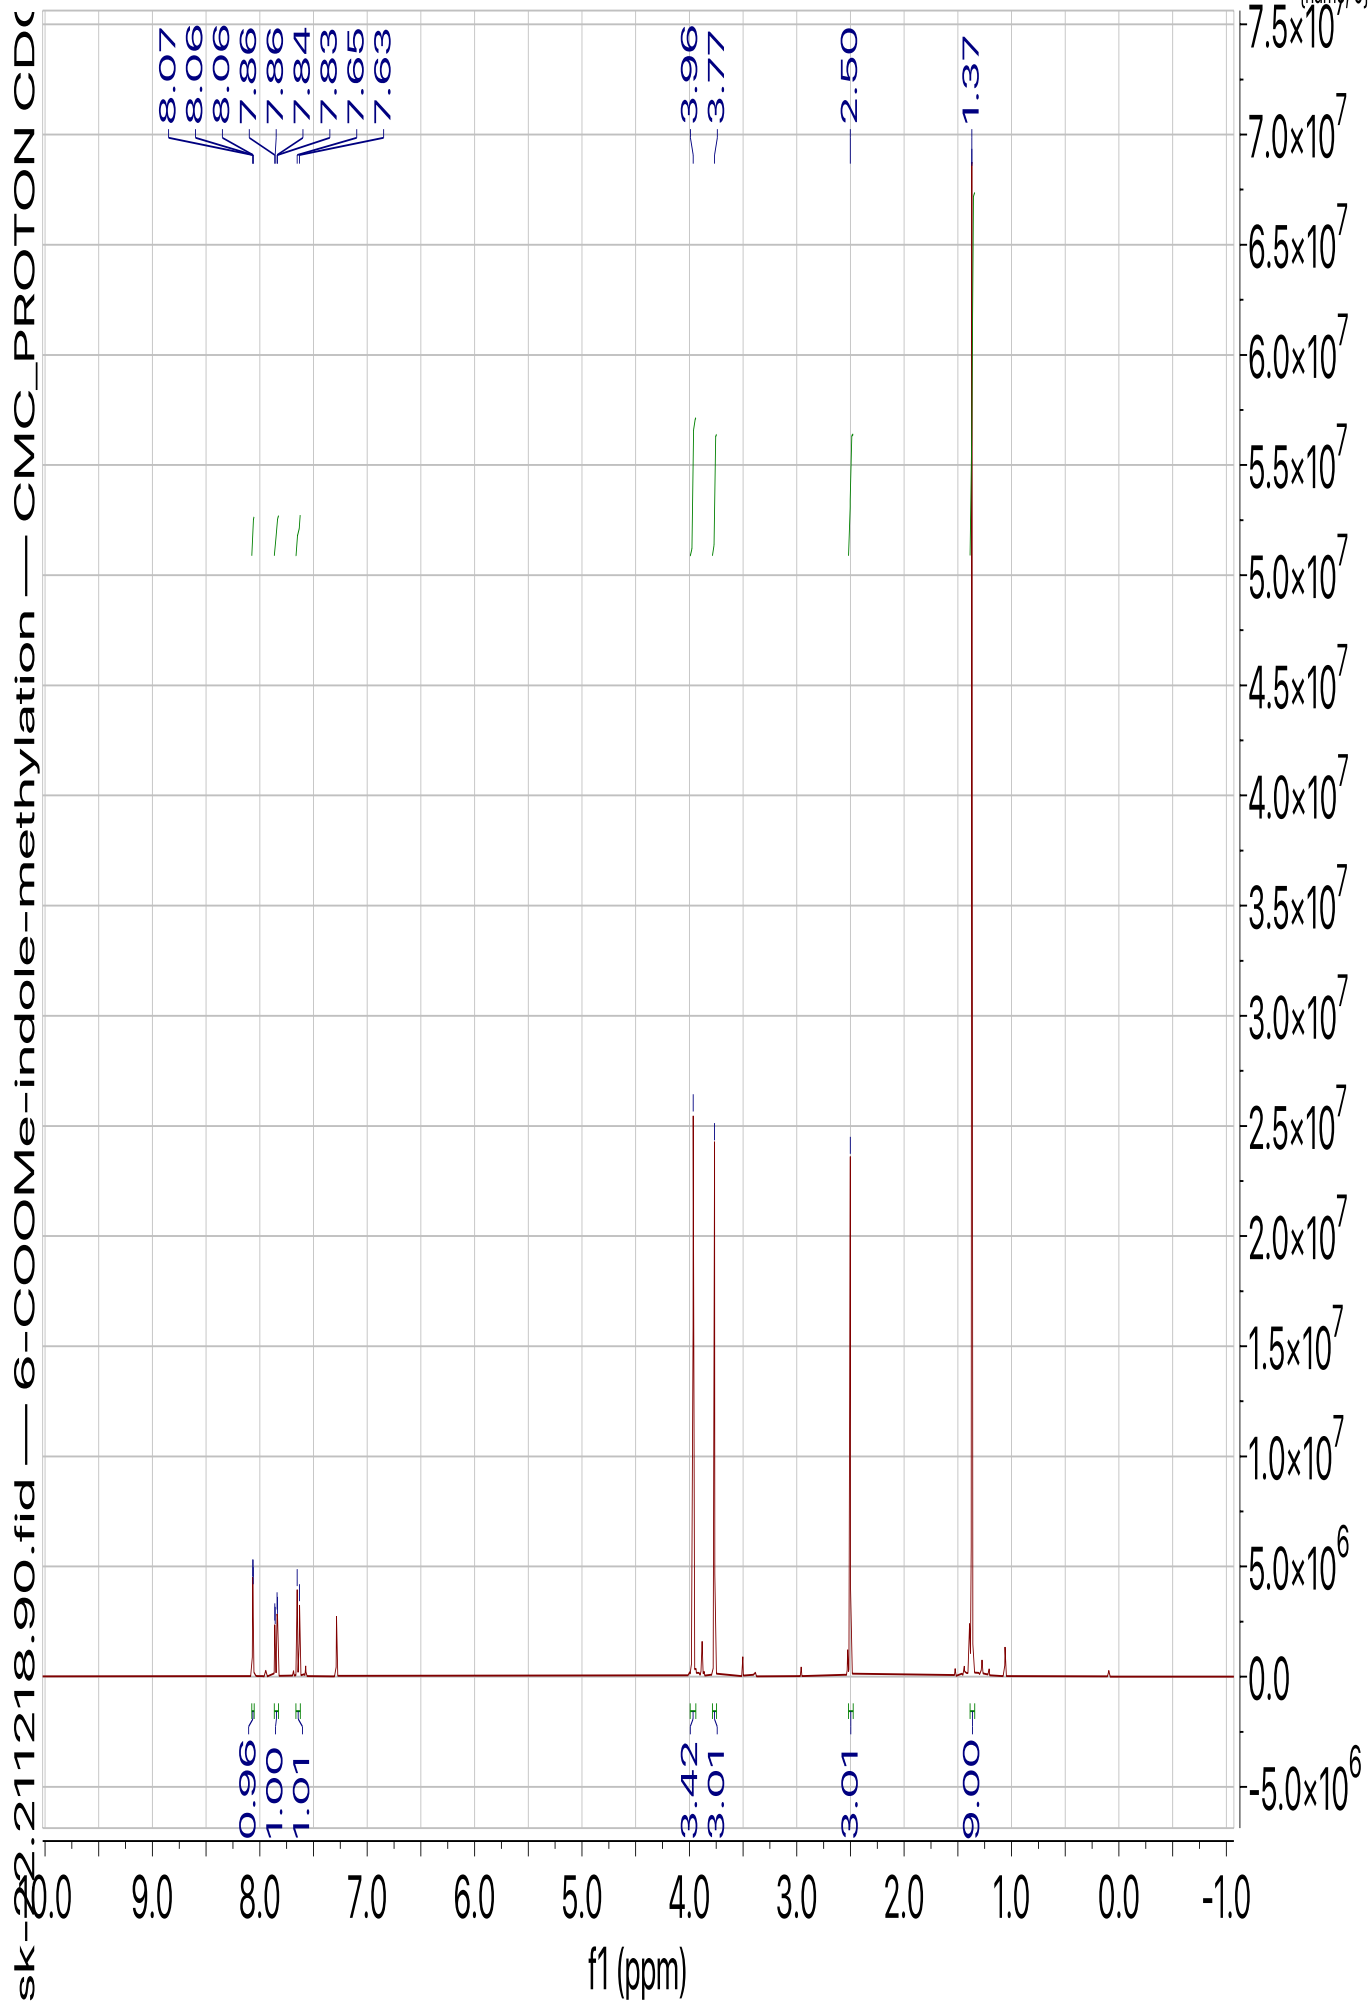

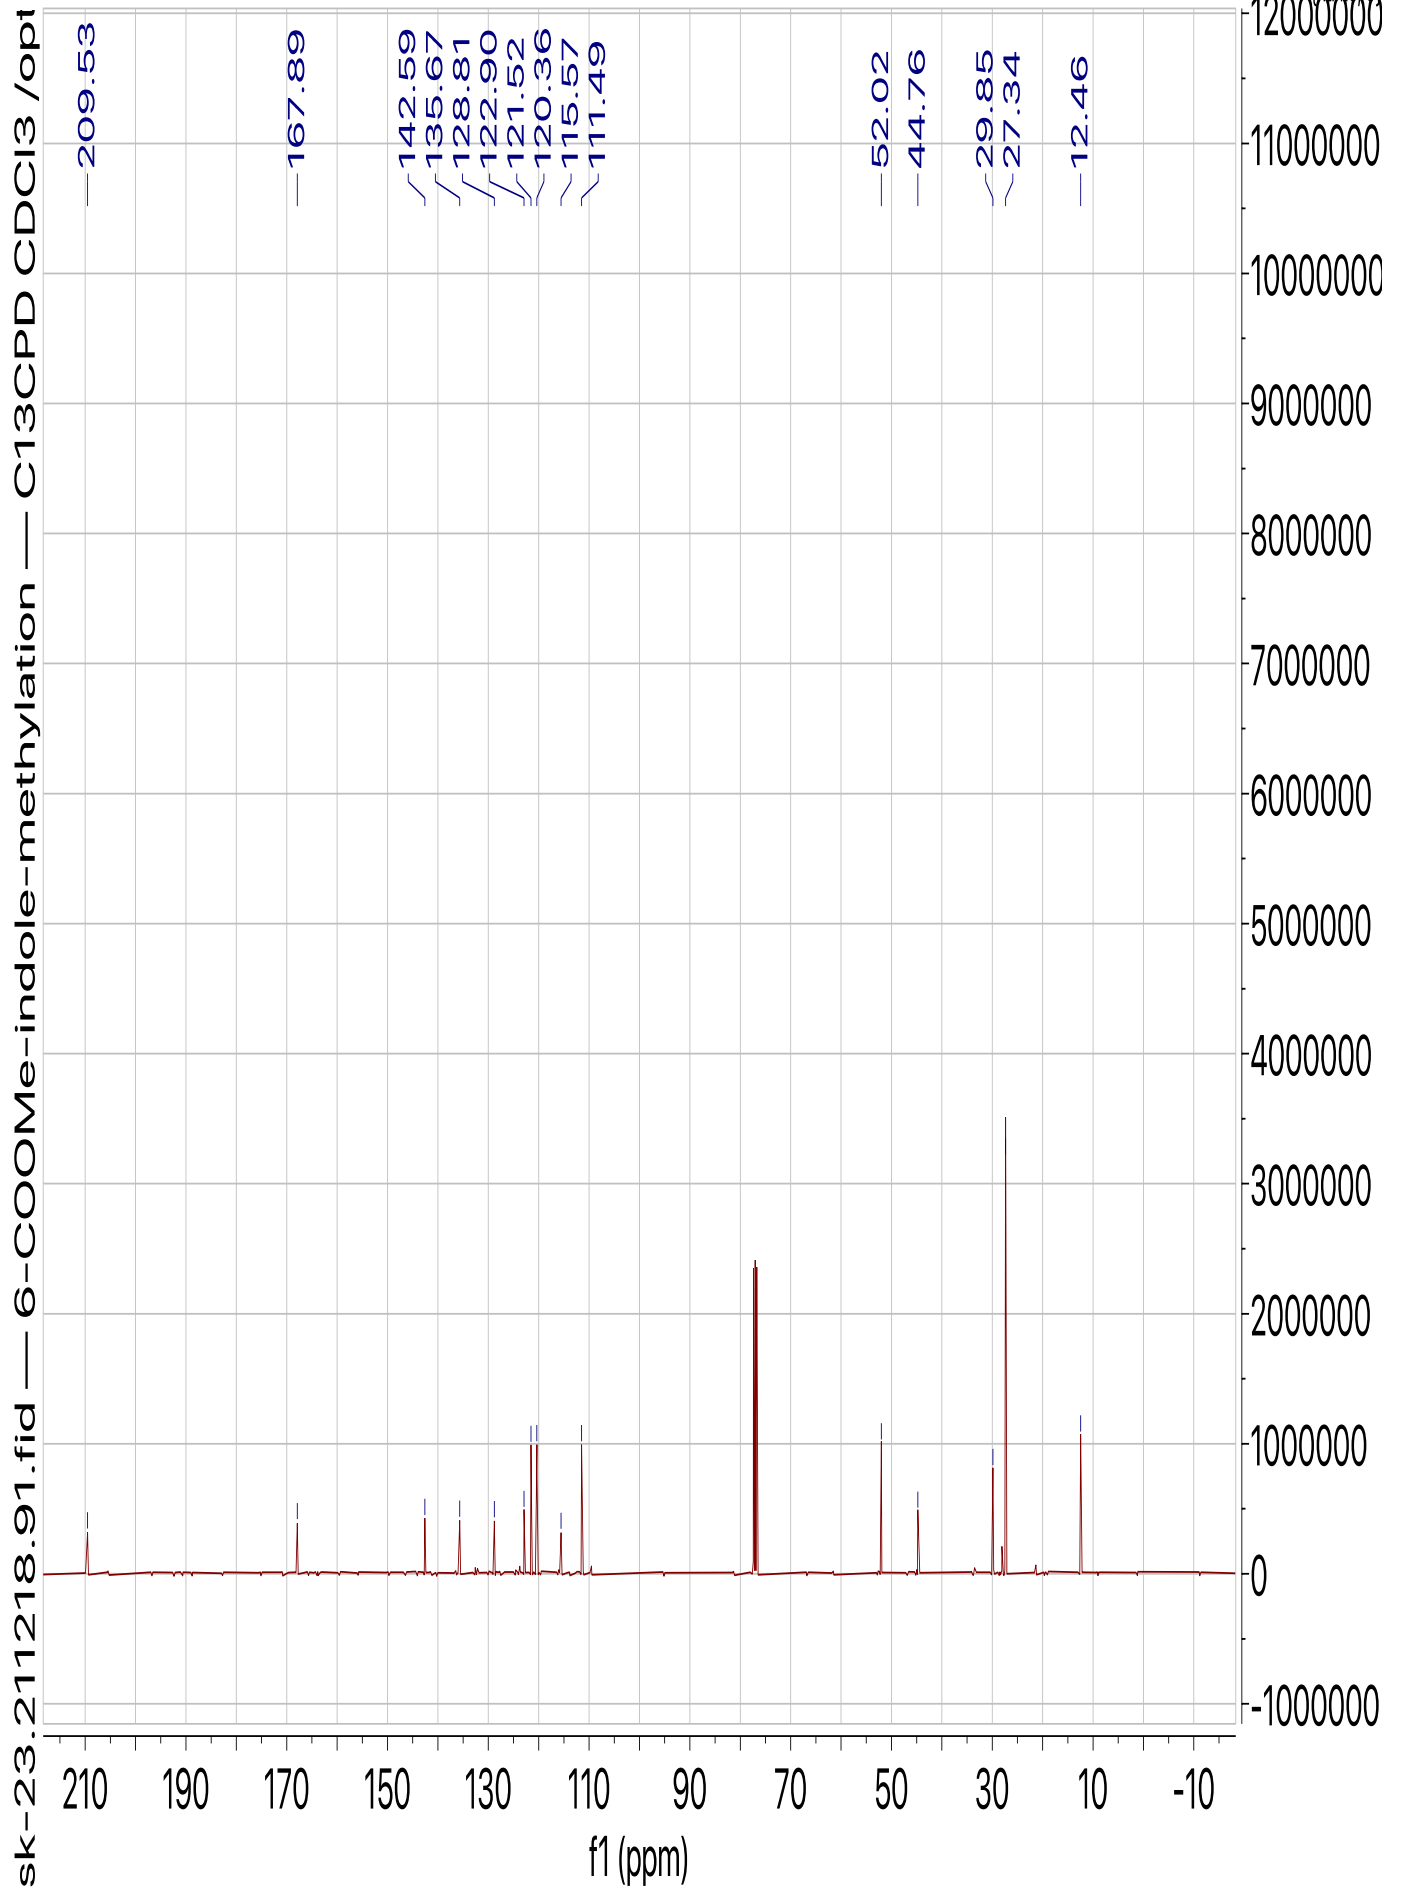

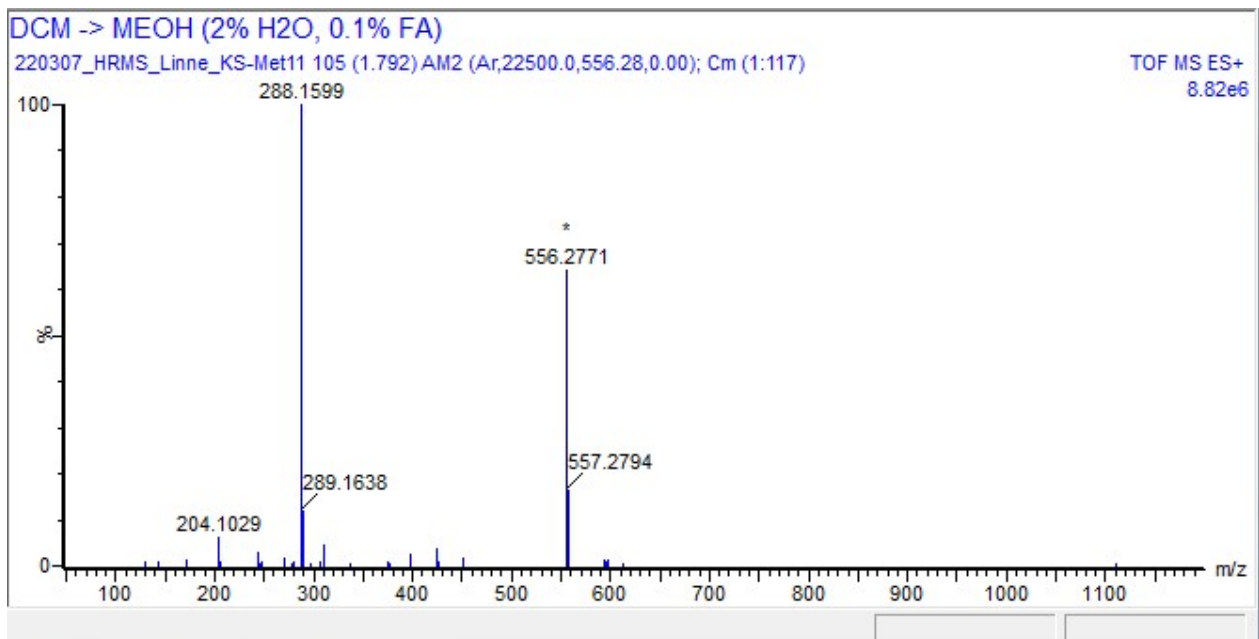

### Single Mass Analysis

Tolerance = 2.0 mDa / DBE: min = -1.5, max = 100.0

Element prediction: Off

Number of isotope peaks used for i-FIT = 2

Monoisotopic Mass, Even Electron Ions

75 formula(e) evaluated with 1 results within limits (all results (up to 1000) for each mass)

Elements Used:

C: 0-60      H: 0-100      N: 0-3      O: 0-4

| Mass     | Calc. Mass | mDa  | PPM  | DBE | Formula      | i-FIT | i-FIT Norm | Fit Conf % | C  | H  | N | O |
|----------|------------|------|------|-----|--------------|-------|------------|------------|----|----|---|---|
| 288.1599 | 288.1600   | -0.1 | -0.3 | 7.5 | C17 H22 N O3 | 27.8  | n/a        | n/a        | 17 | 22 | 1 | 3 |

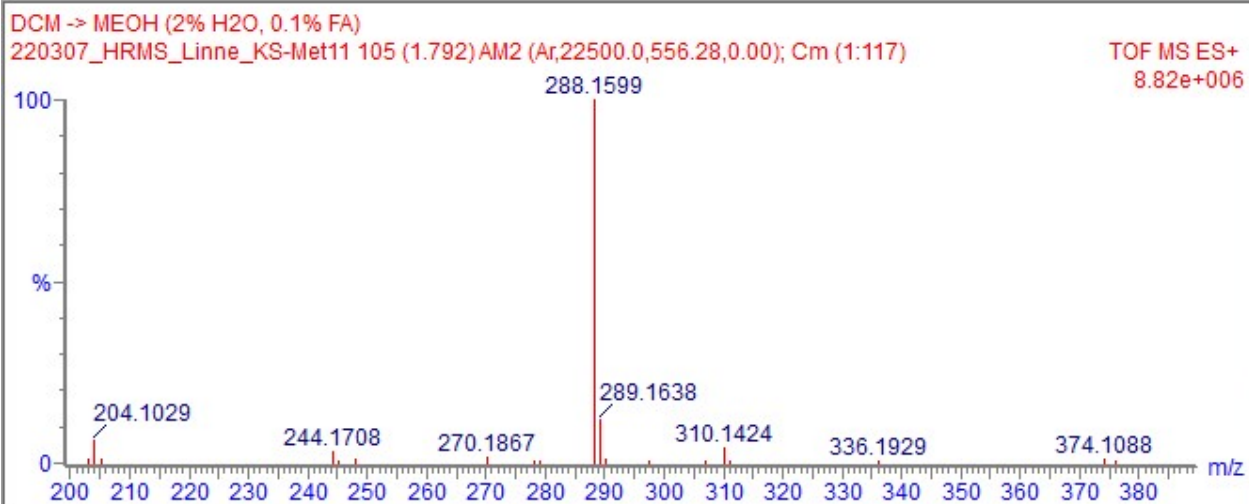

HRMS spectra of **3e**

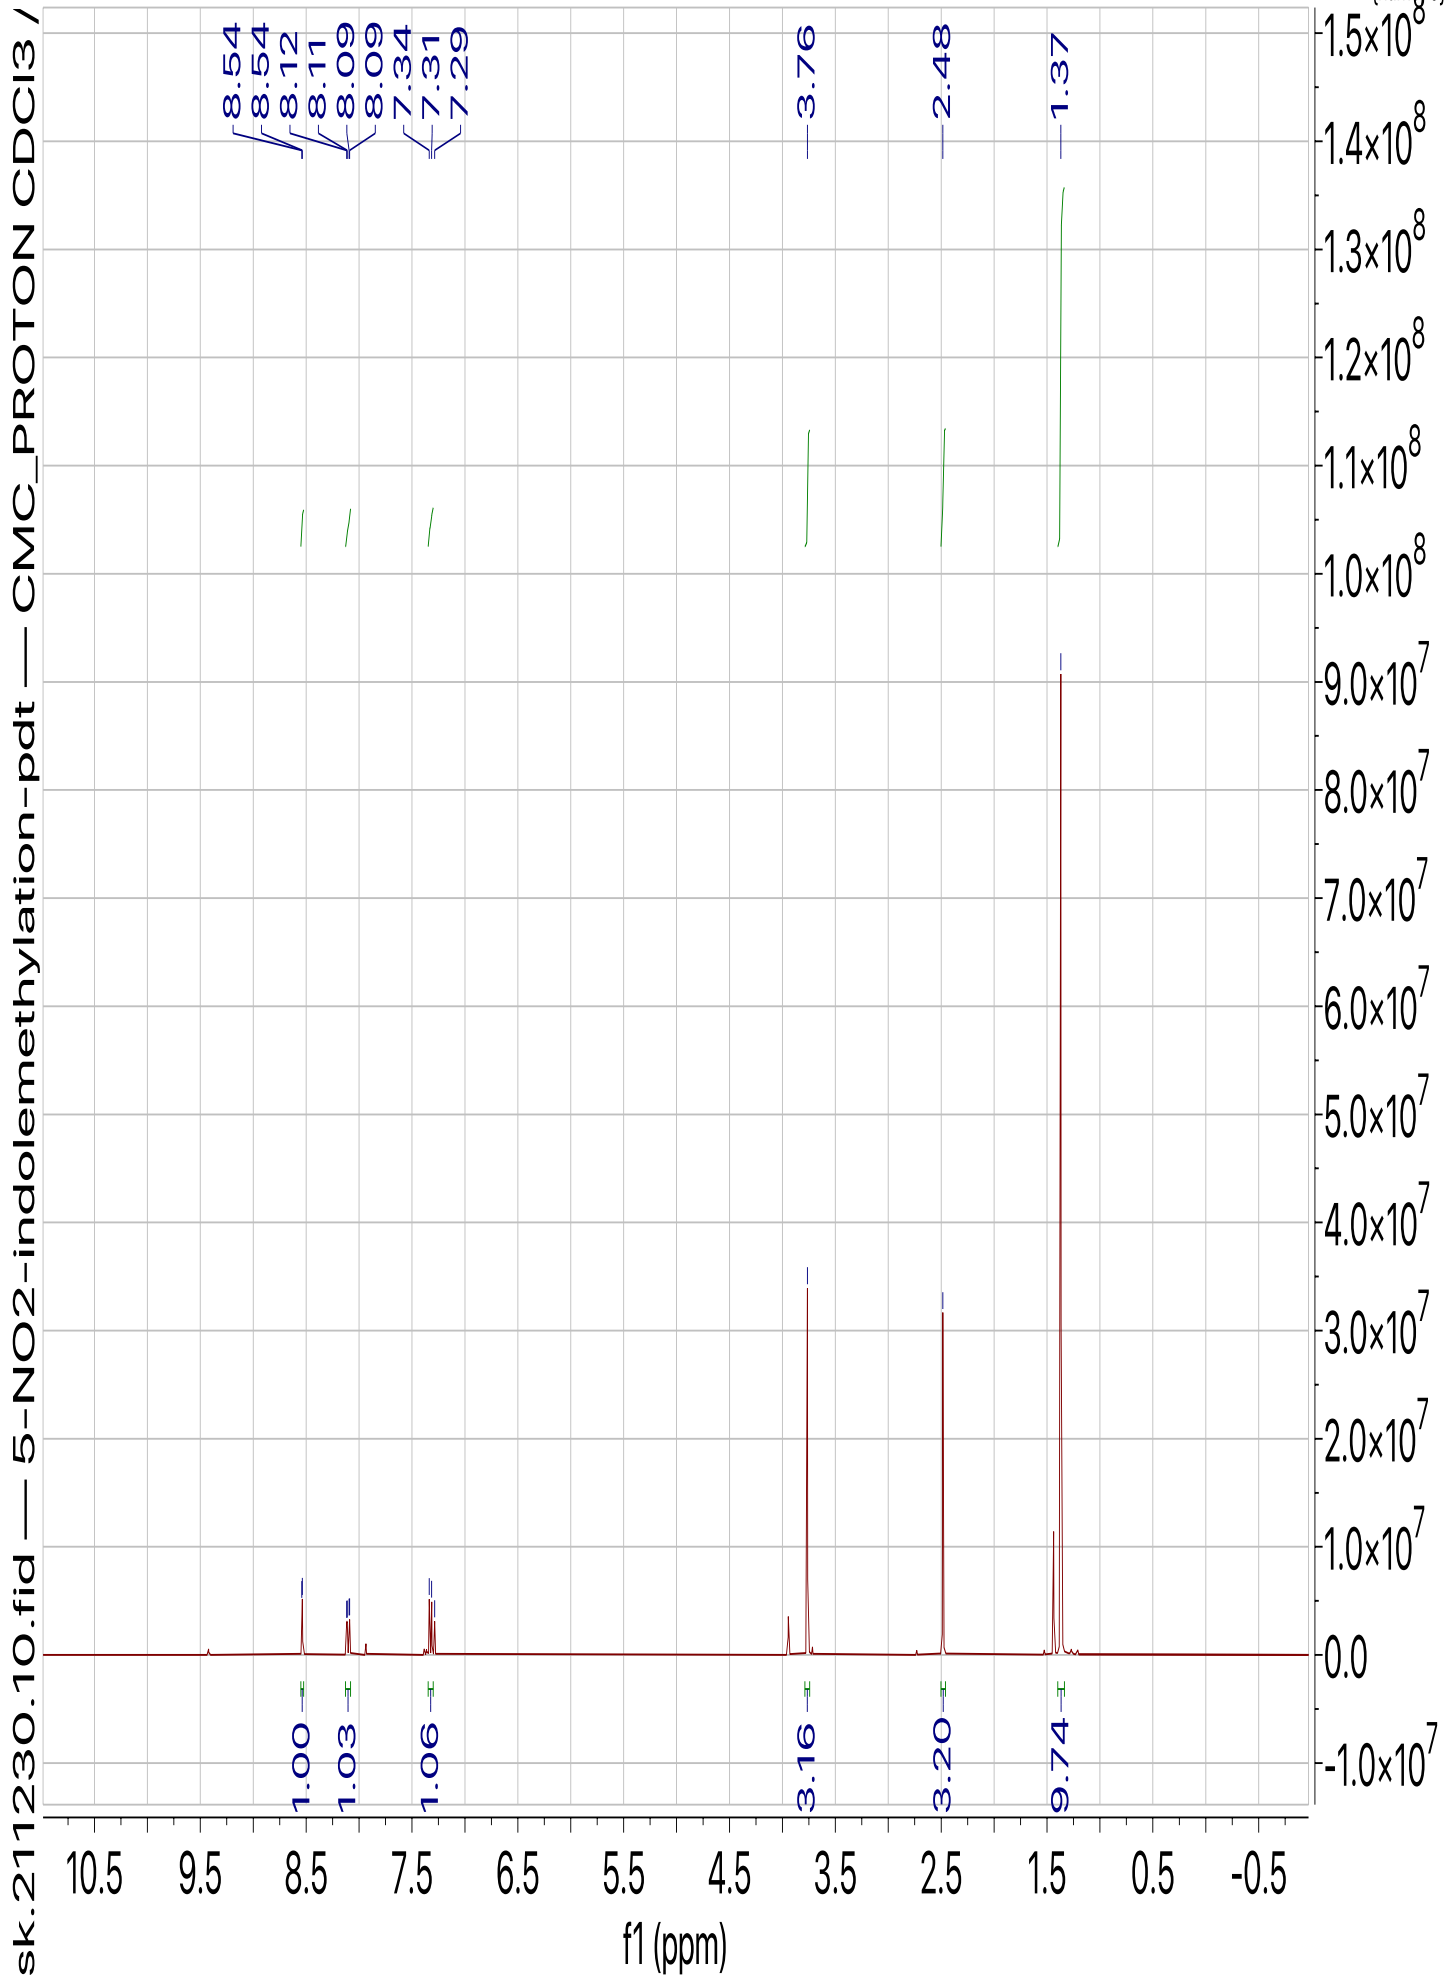

3f, <sup>13</sup>C NMR (101 MHz, CDCl<sub>3</sub>)

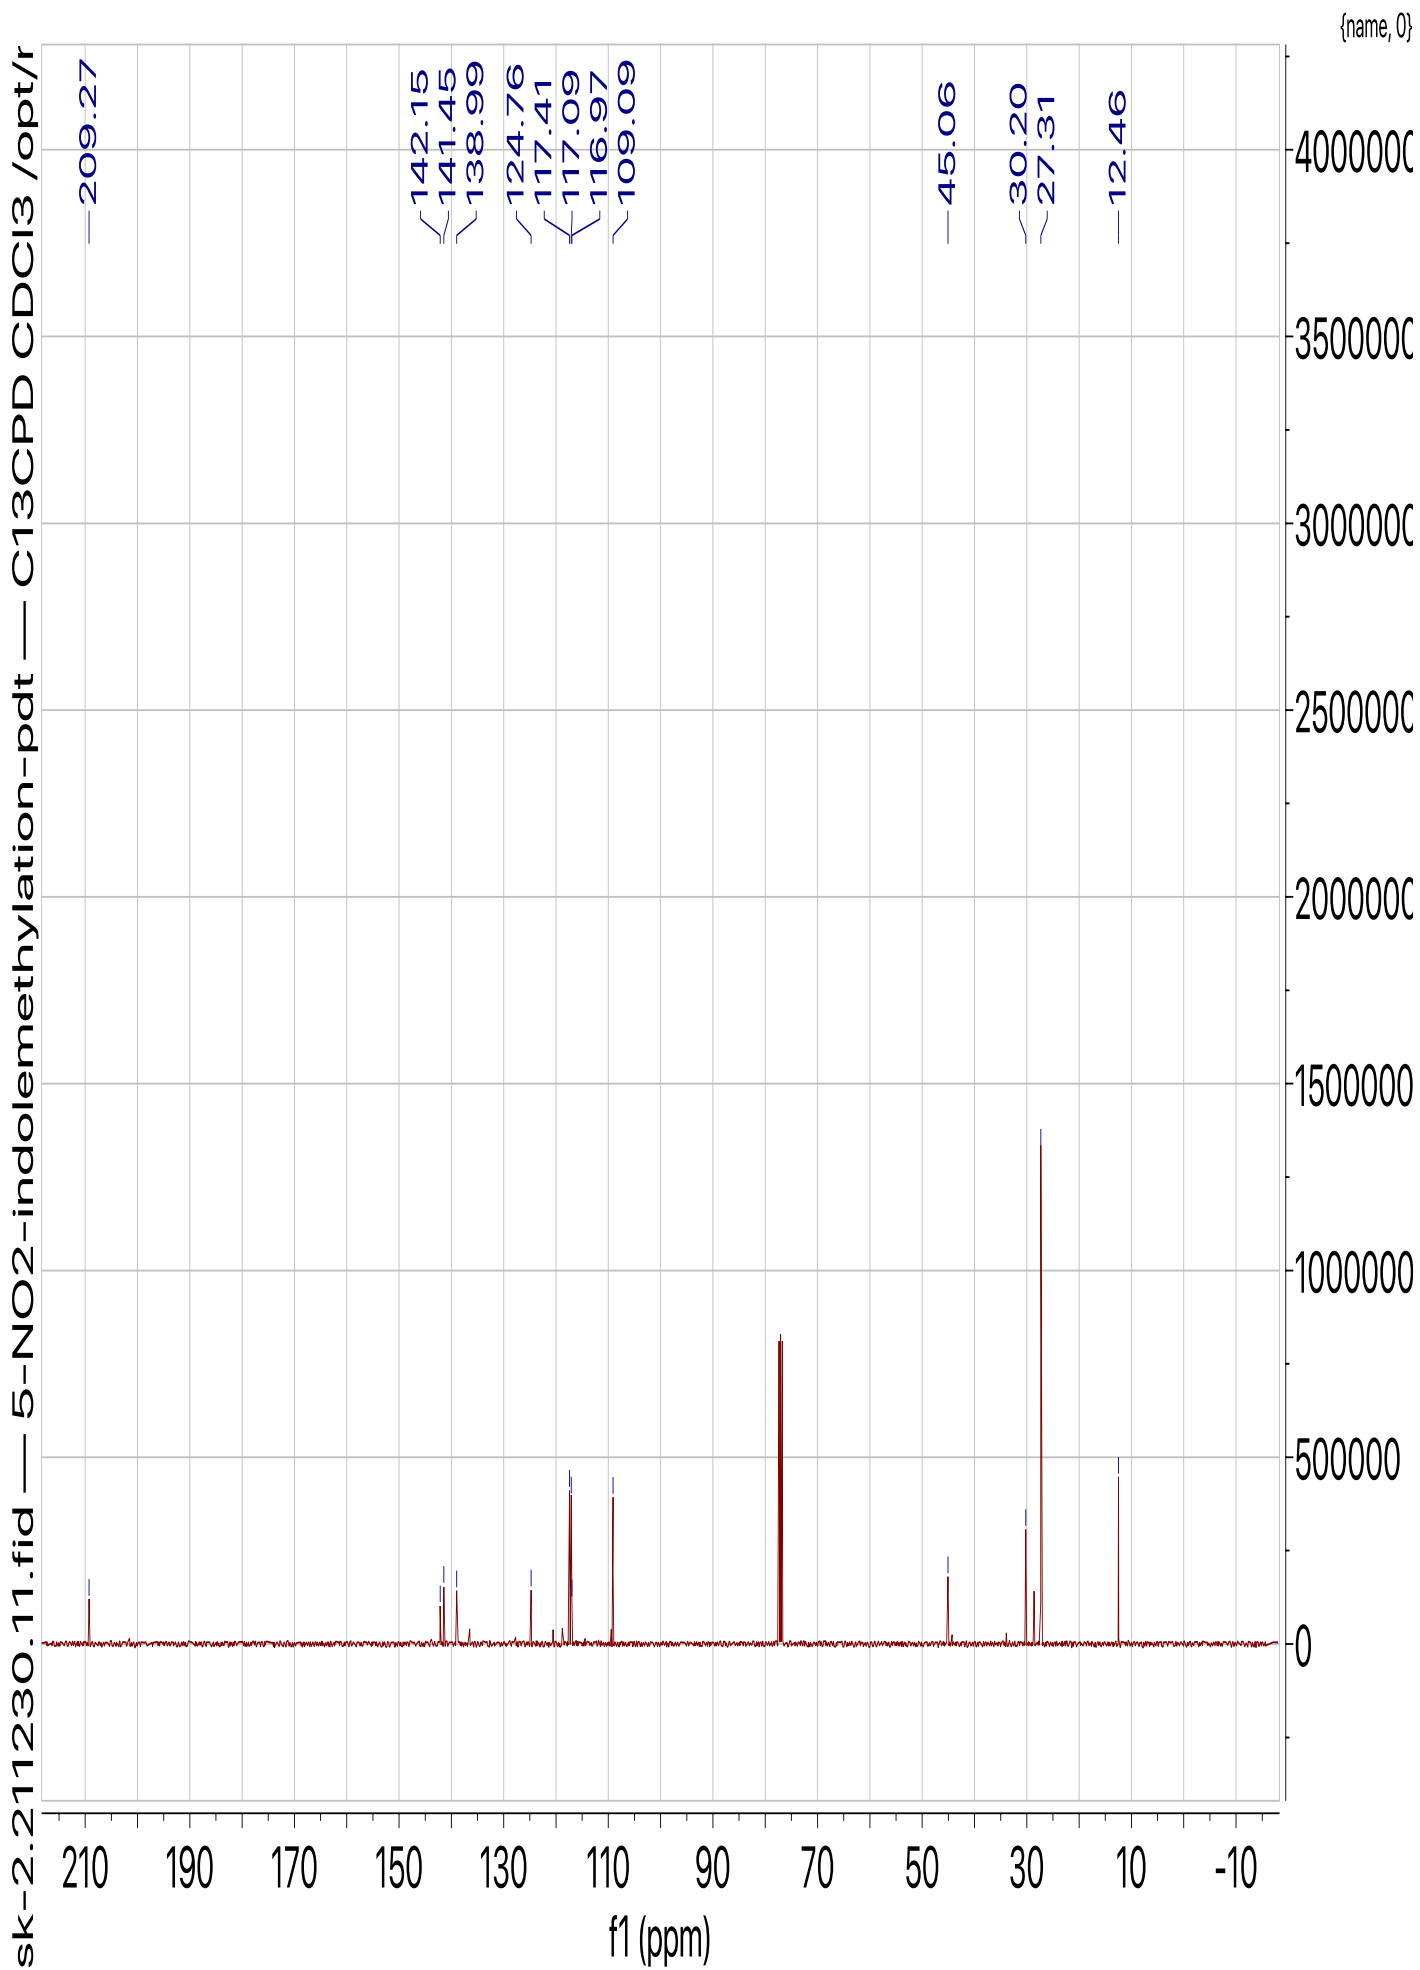



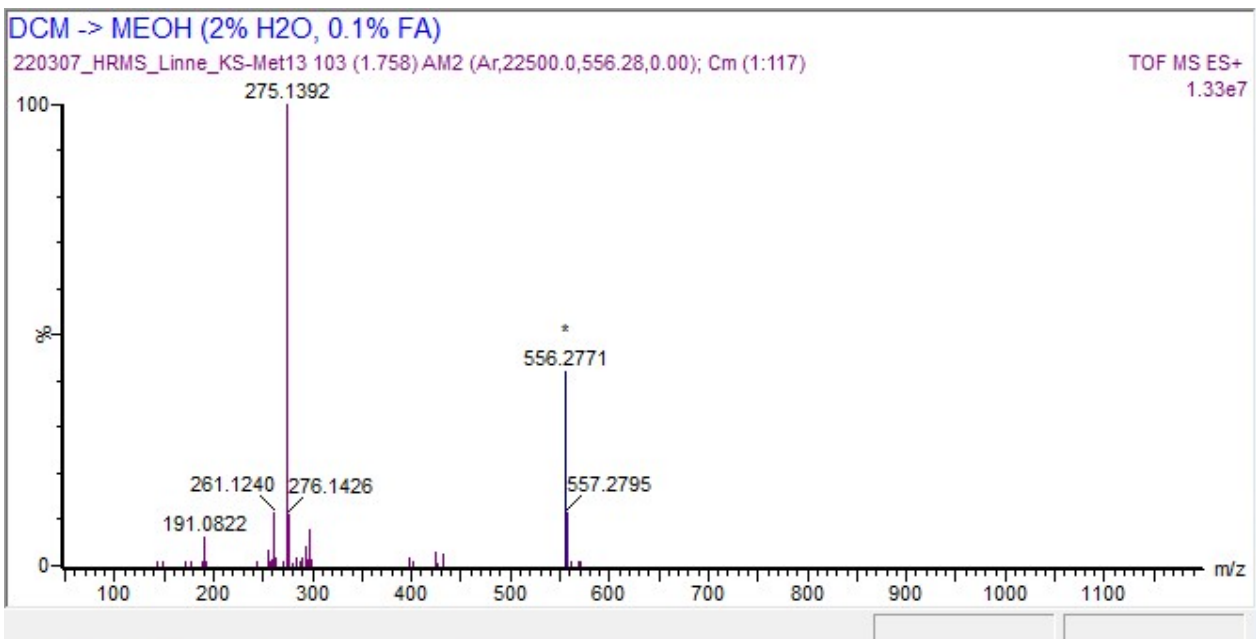

### Single Mass Analysis

Tolerance = 2.0 mDa / DBE: min = -1.5, max = 100.0

Element prediction: Off

Number of isotope peaks used for i-FIT = 2

Monoisotopic Mass, Even Electron Ions

74 formula(e) evaluated with 1 results within limits (all results (up to 1000) for each mass)

Elements Used:

C: 0-60      H: 0-100      N: 0-3      O: 0-4

| Mass     | Calc. Mass | mDa  | PPM  | DBE | Formula       | i-FIT | i-FIT Norm | Fit Conf % | C  | H  | N | O |
|----------|------------|------|------|-----|---------------|-------|------------|------------|----|----|---|---|
| 275.1392 | 275.1396   | -0.4 | -1.5 | 7.5 | C15 H19 N2 O3 | 50.0  | n/a        | n/a        | 15 | 19 | 2 | 3 |

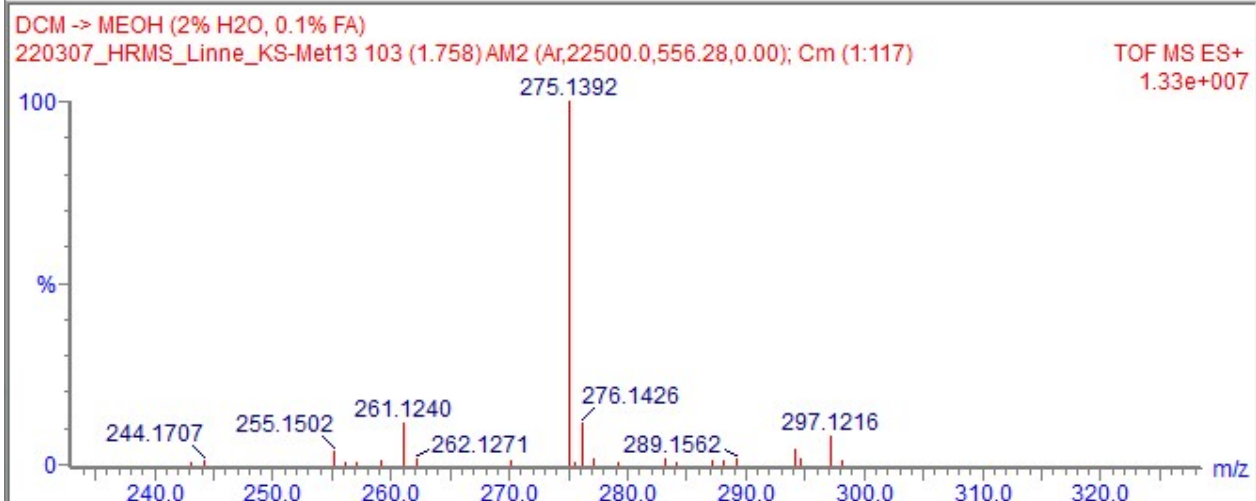

HRMS spectra of **3f**

3g, <sup>1</sup>H NMR, CDCl<sub>3</sub>, 400 MHz  
Minor C4 isomer also observed

{name, 0}

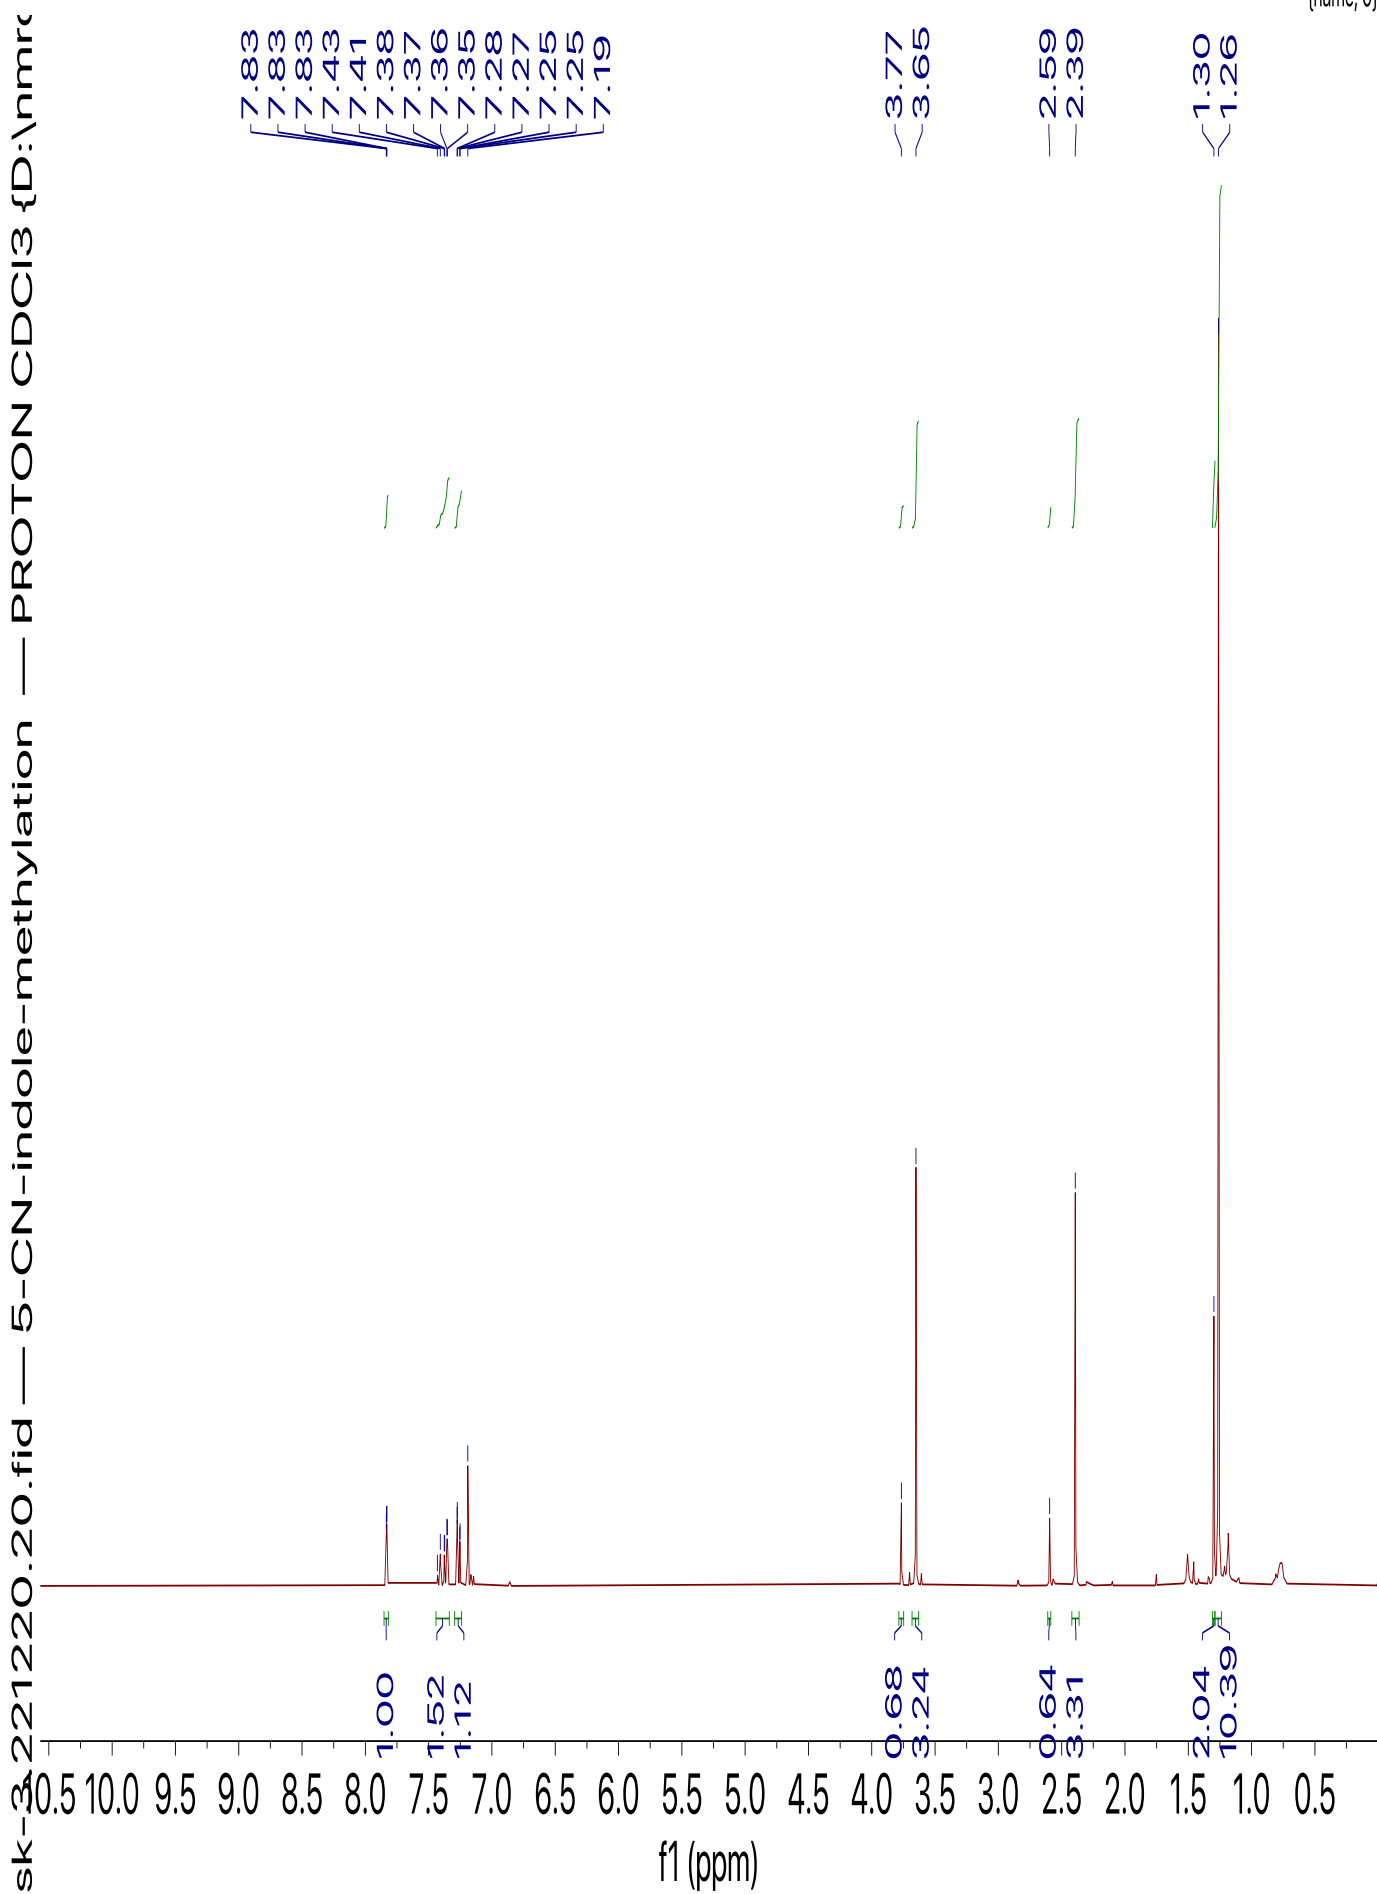

sk-4.221220.21.fid — 5-CN-indole-methylation — C13CPD CDCl3 {D:\nmrd.

3g, <sup>13</sup>C NMR (101 MHz, CDCl<sub>3</sub>)  
Minor C2 isomer also observed

{name, 0}

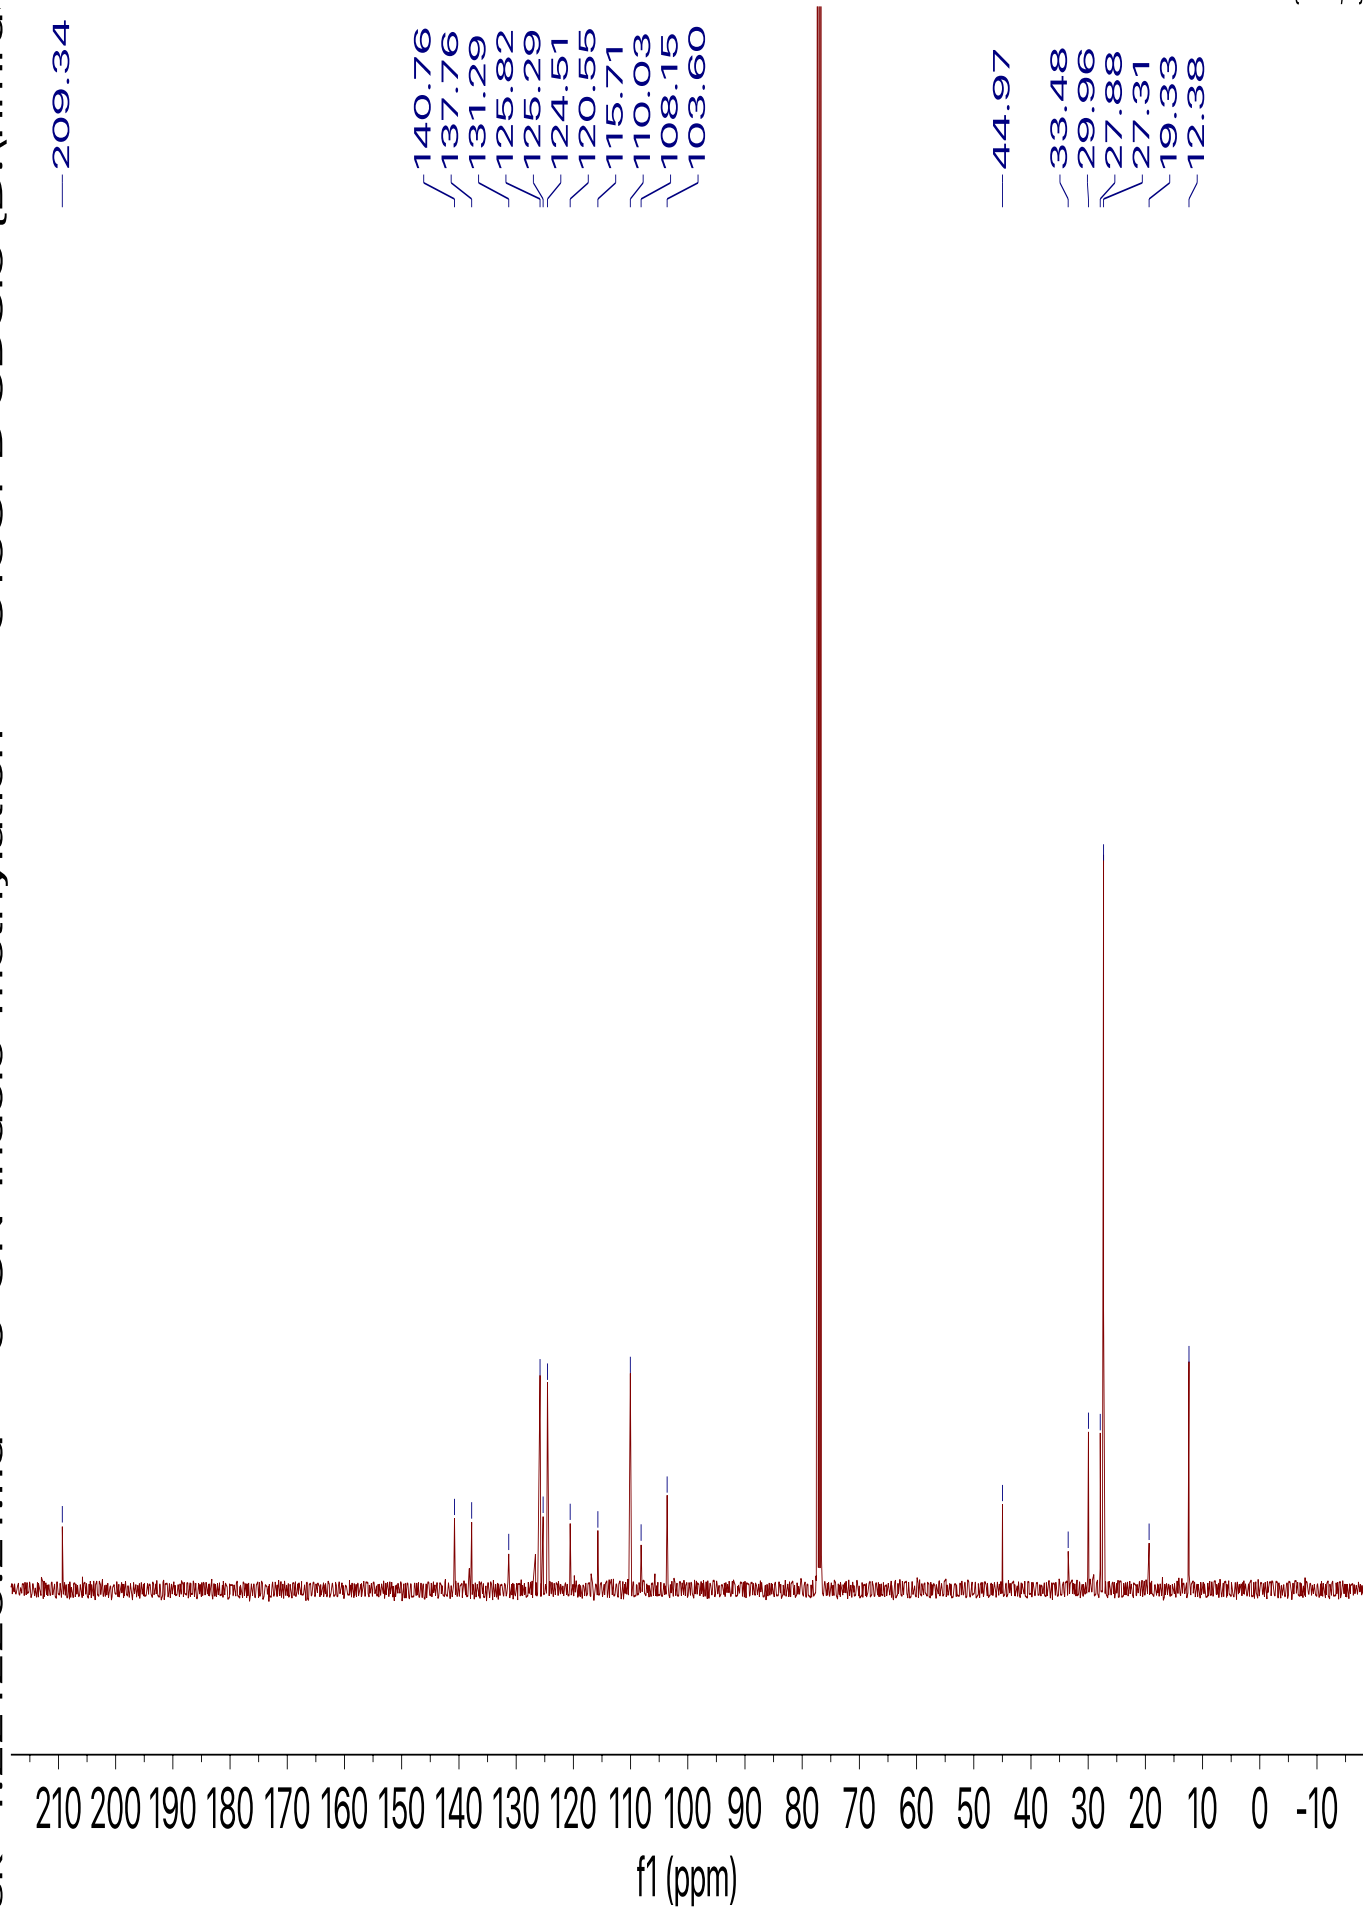

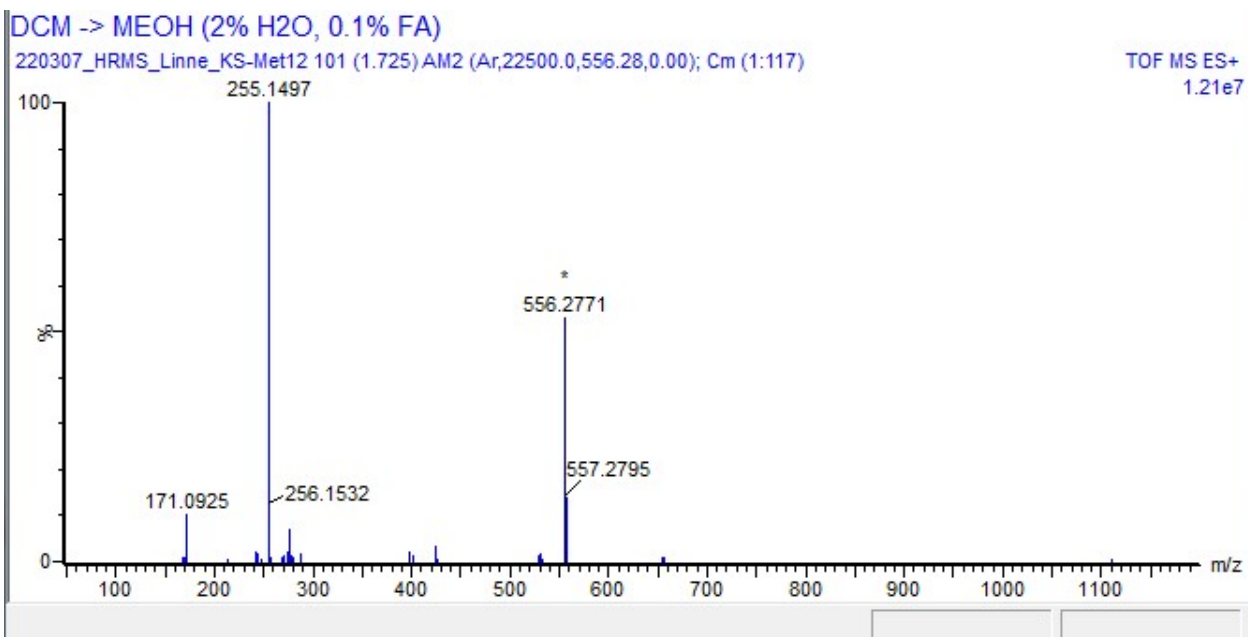

### Single Mass Analysis

Tolerance = 2.0 mDa / DBE: min = -1.5, max = 100.0

Element prediction: Off

Number of isotope peaks used for i-FIT = 2

Monoisotopic Mass, Even Electron Ions

72 formula(e) evaluated with 1 results within limits (all results (up to 1000) for each mass)

Elements Used:

C: 0-60      H: 0-100      N: 0-3      O: 0-4

| Mass     | Calc. Mass | mDa | PPM | DBE | Formula                                          | i-FIT | i-FIT Nor... | Fit Conf % | C  | H  | N | O |
|----------|------------|-----|-----|-----|--------------------------------------------------|-------|--------------|------------|----|----|---|---|
| 255.1497 | 255.1497   | 0.0 | 0.0 | 8.5 | C <sub>16</sub> H <sub>19</sub> N <sub>2</sub> O | 50.3  | n/a          | n/a        | 16 | 19 | 2 | 1 |

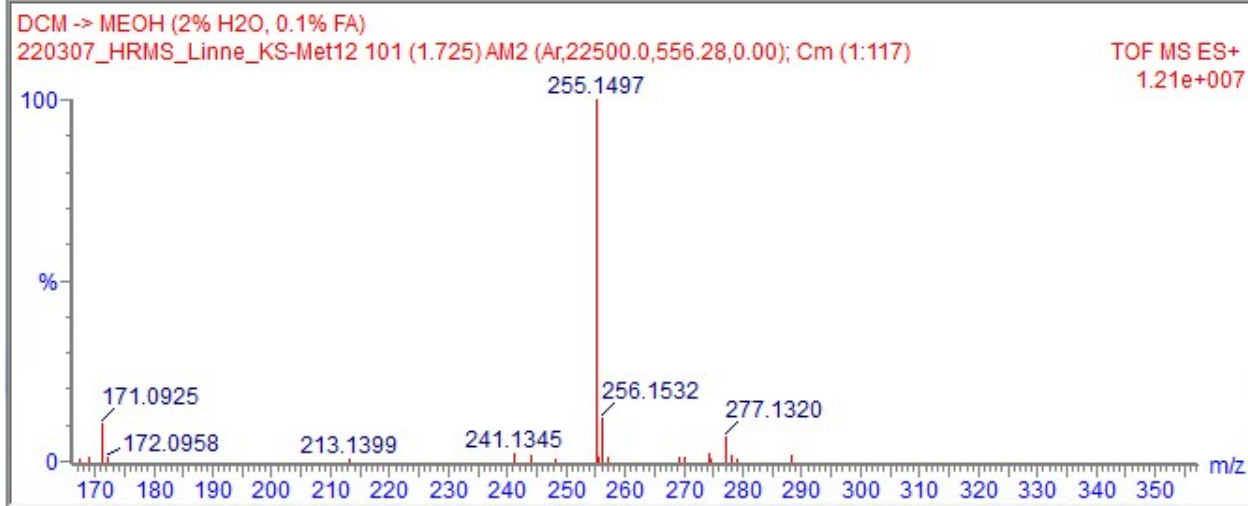

HRMS spectra of **3g**

3h, <sup>1</sup>H NMR, CDCl<sub>3</sub>, 400 MHz

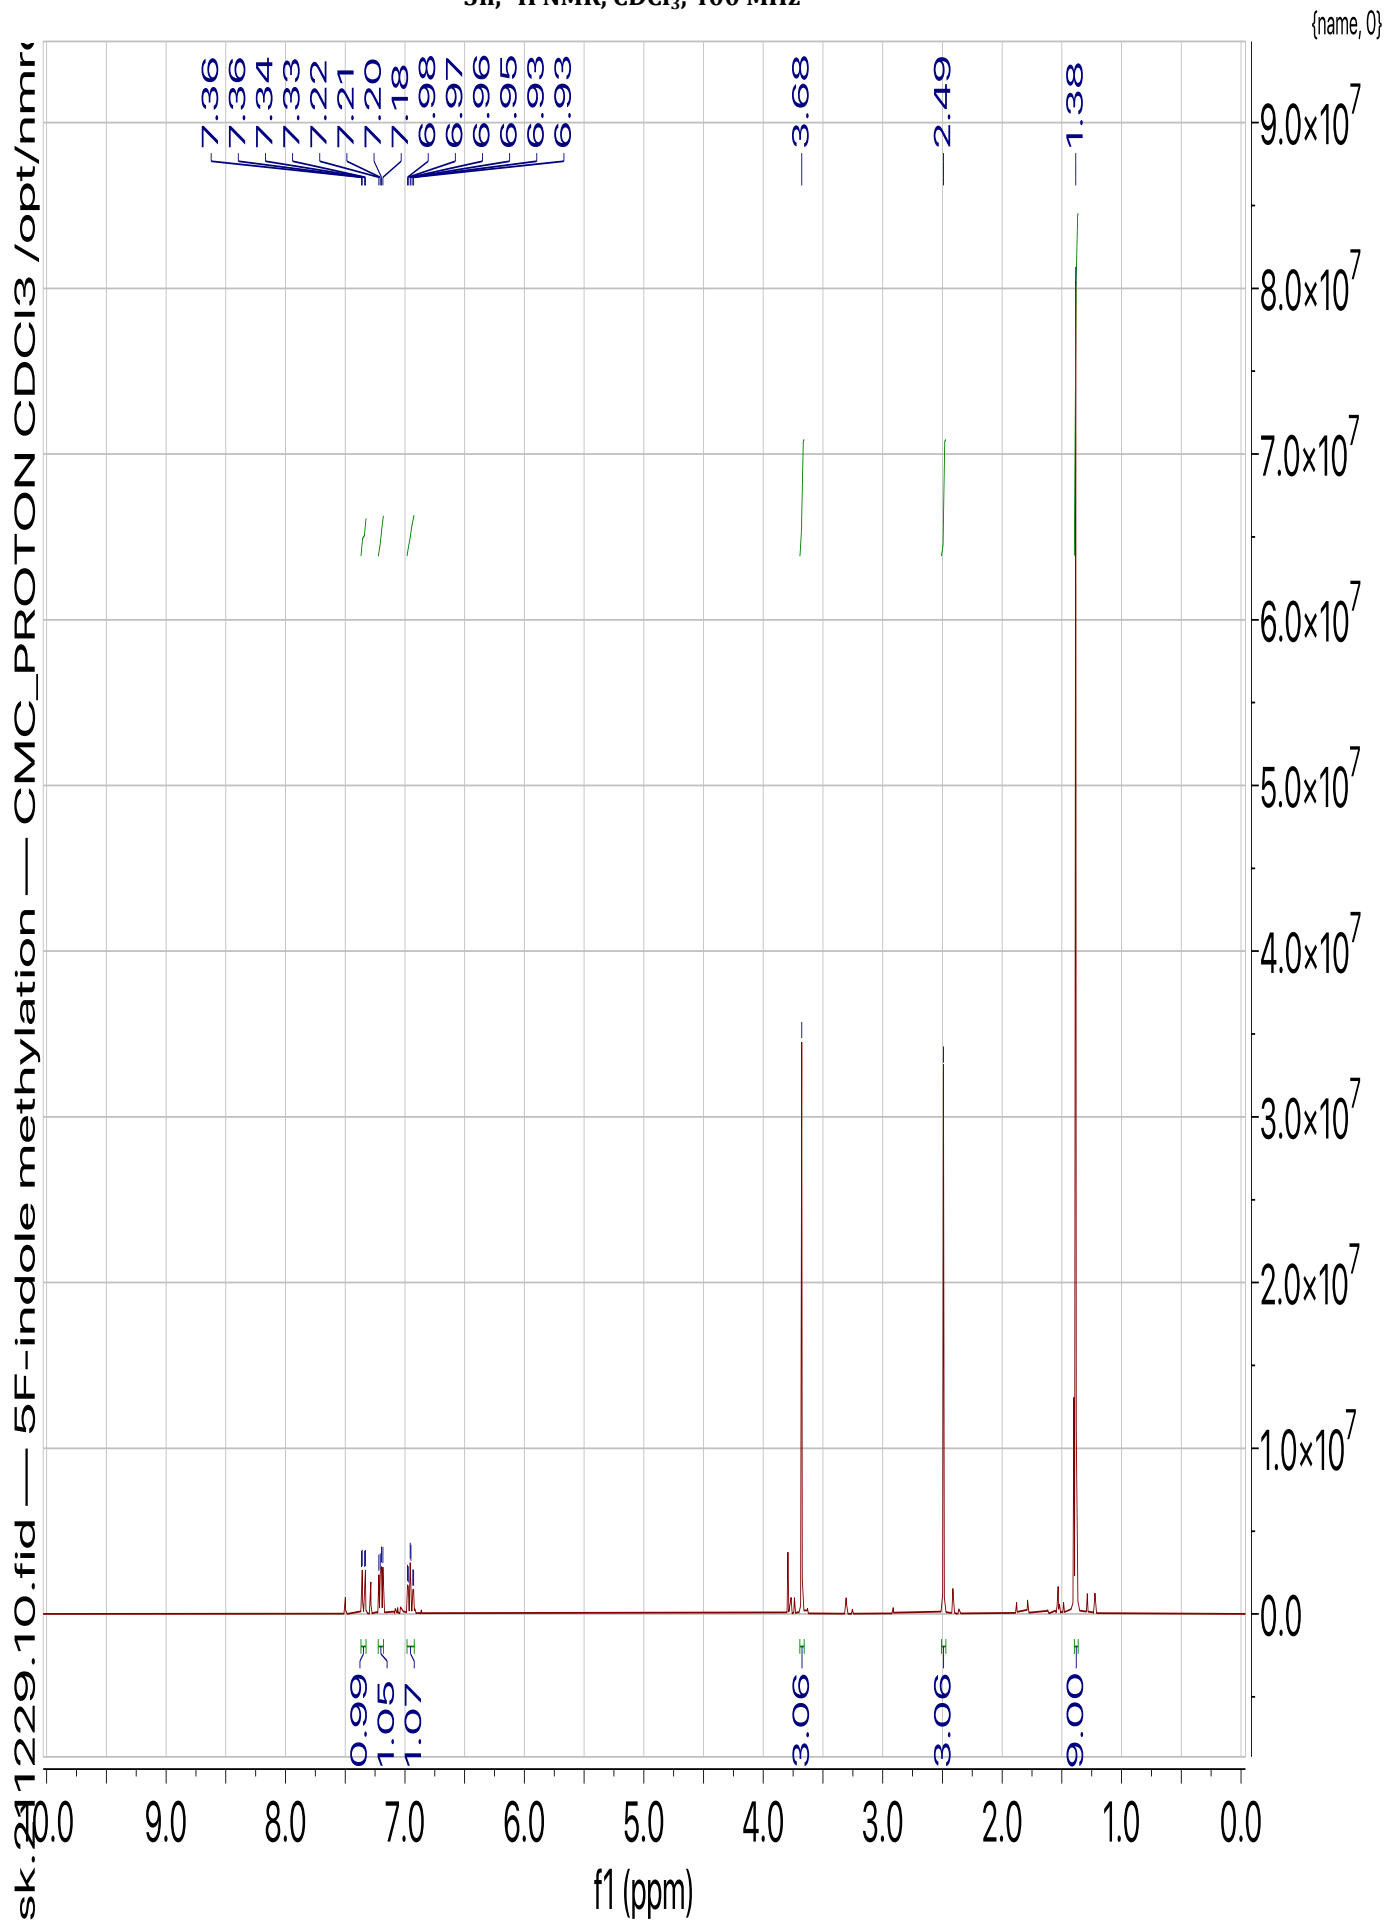

3h, <sup>13</sup>C NMR (101 MHz, CDCl<sub>3</sub>)

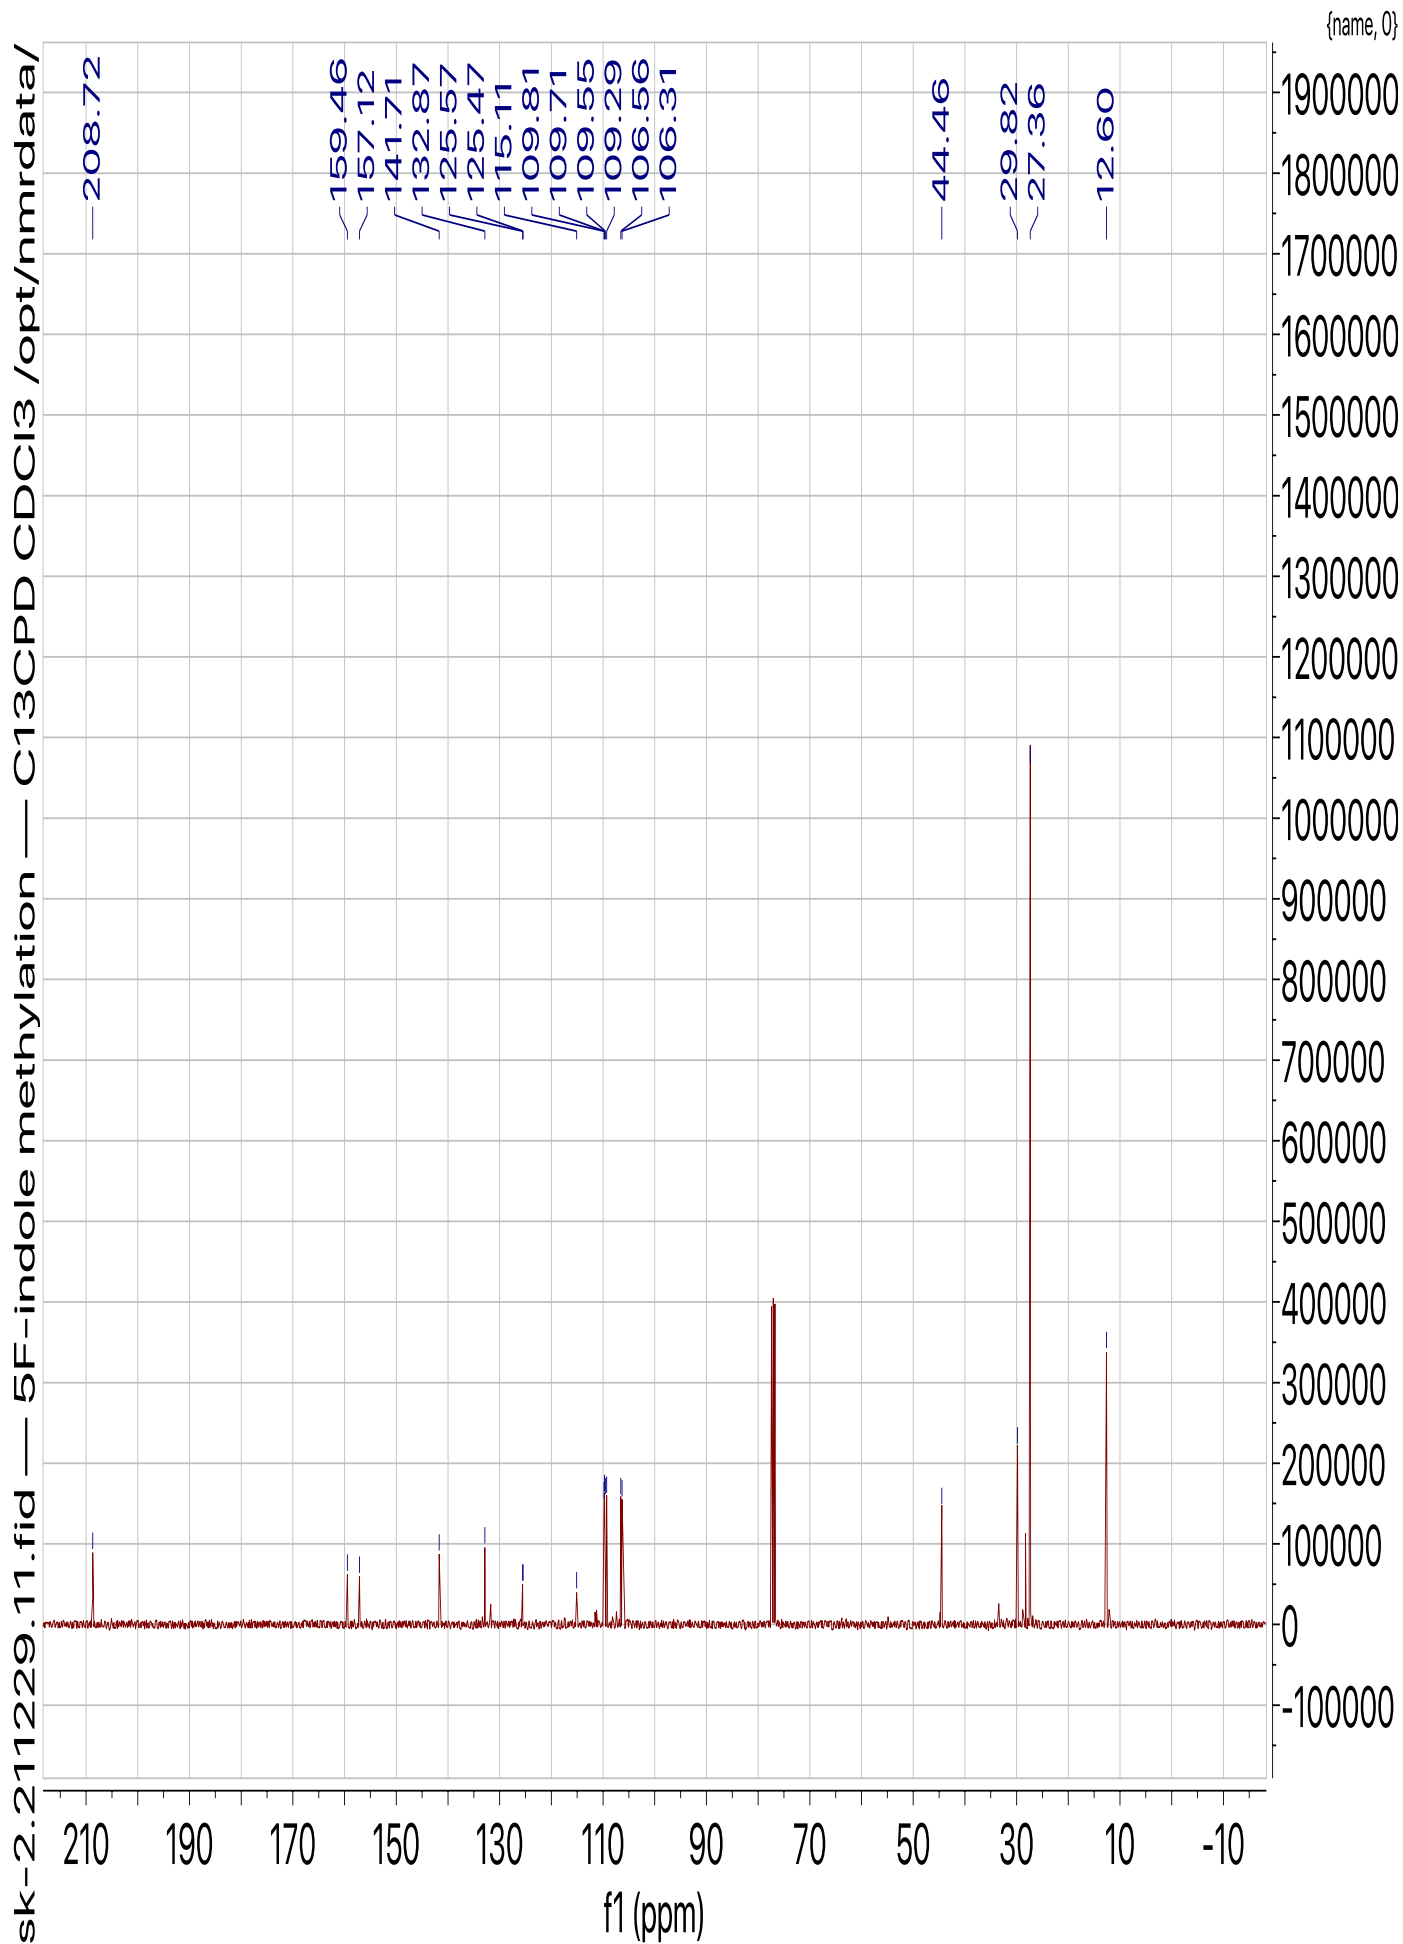

3h, <sup>19</sup>F NMR, CDCl<sub>3</sub>

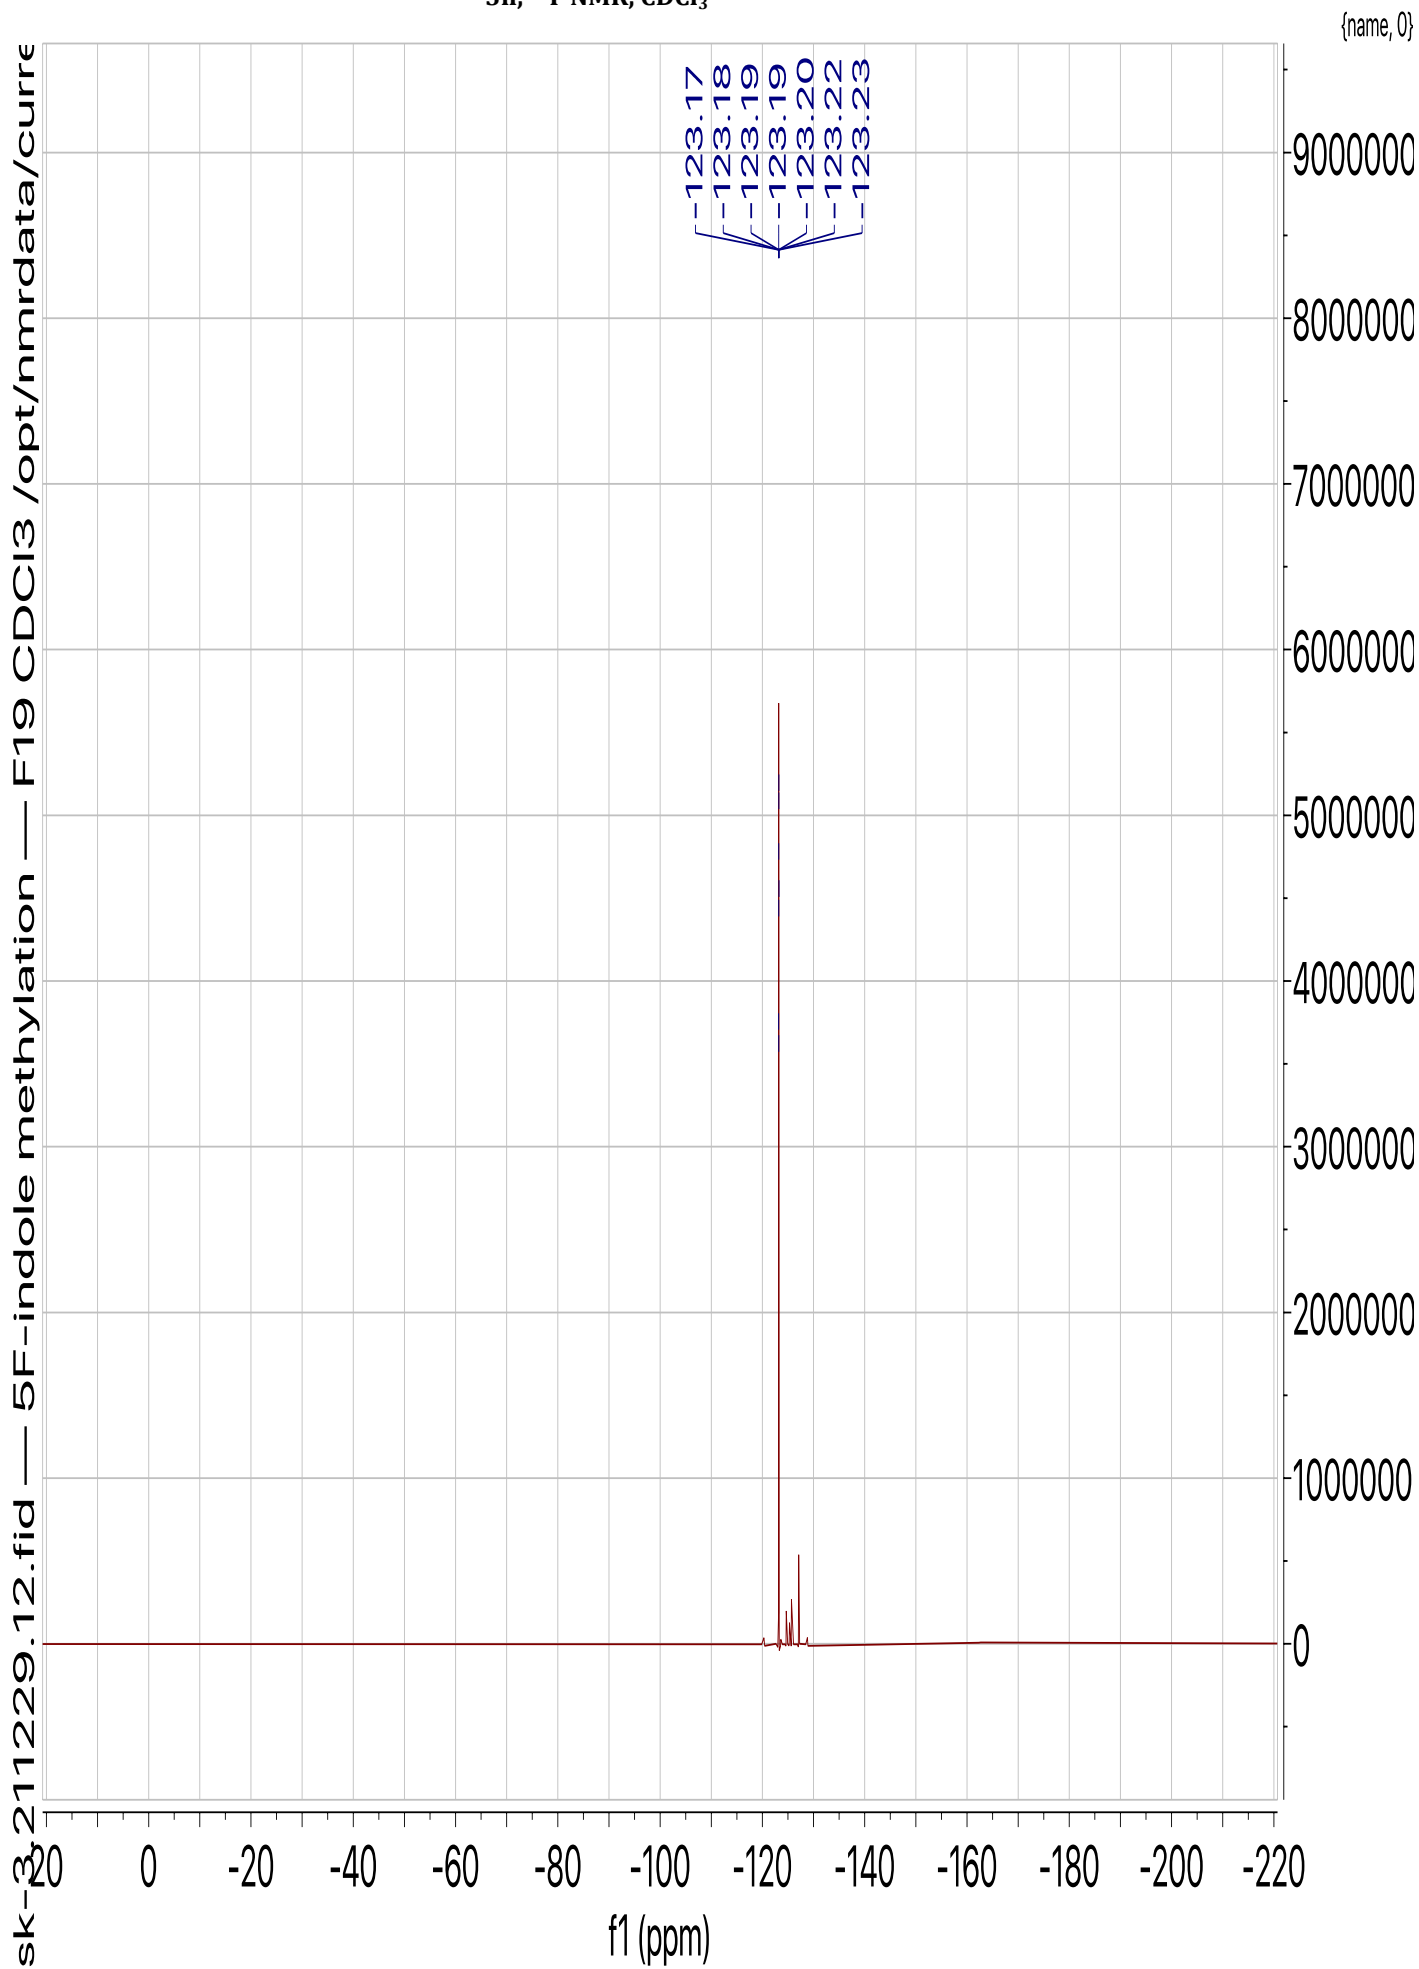

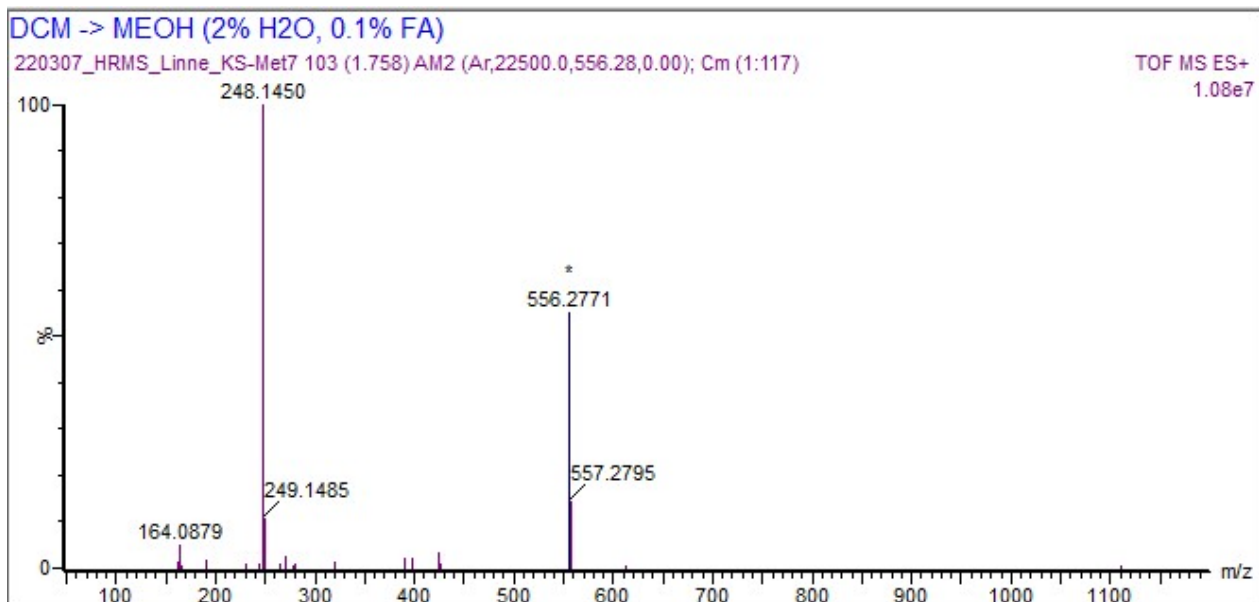

### Single Mass Analysis

Tolerance = 2.0 mDa / DBE: min = -1.5, max = 100.0

Element prediction: Off

Number of isotope peaks used for i-FIT = 2

Monoisotopic Mass, Even Electron Ions

129 formula(e) evaluated with 2 results within limits (all results (up to 1000) for each mass)

Elements Used:

C: 0-60      H: 0-100      N: 0-3      O: 0-4      F: 0-1

| Mass     | Calc. Mass | mDa  | PPM  | DBE  | Formula       | i-FIT | i-FIT ... | Fit Conf % | C  | H  | N | O | F |
|----------|------------|------|------|------|---------------|-------|-----------|------------|----|----|---|---|---|
| 248.1450 | 248.1451   | -0.1 | -0.4 | 6.5  | C15 H19 N O F | 50.4  | 0.093     | 91.15      | 15 | 19 | 1 | 1 | 1 |
|          | 248.1439   | 1.1  | 4.4  | 10.5 | C18 H18 N     | 52.8  | 2.425     | 8.85       | 18 | 18 | 1 |   |   |

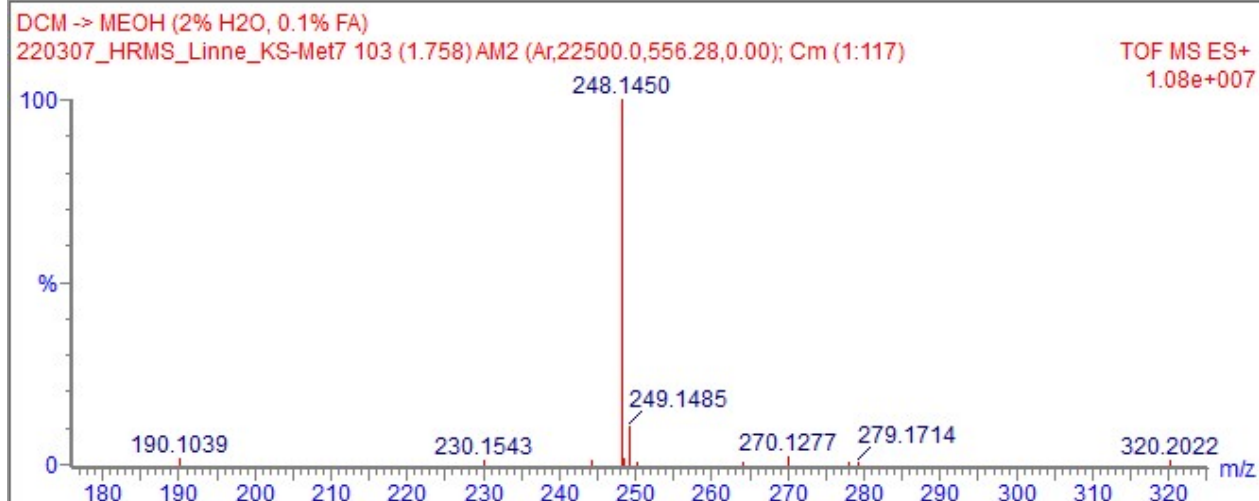

HRMS spectra of **3h**



{name, 0}

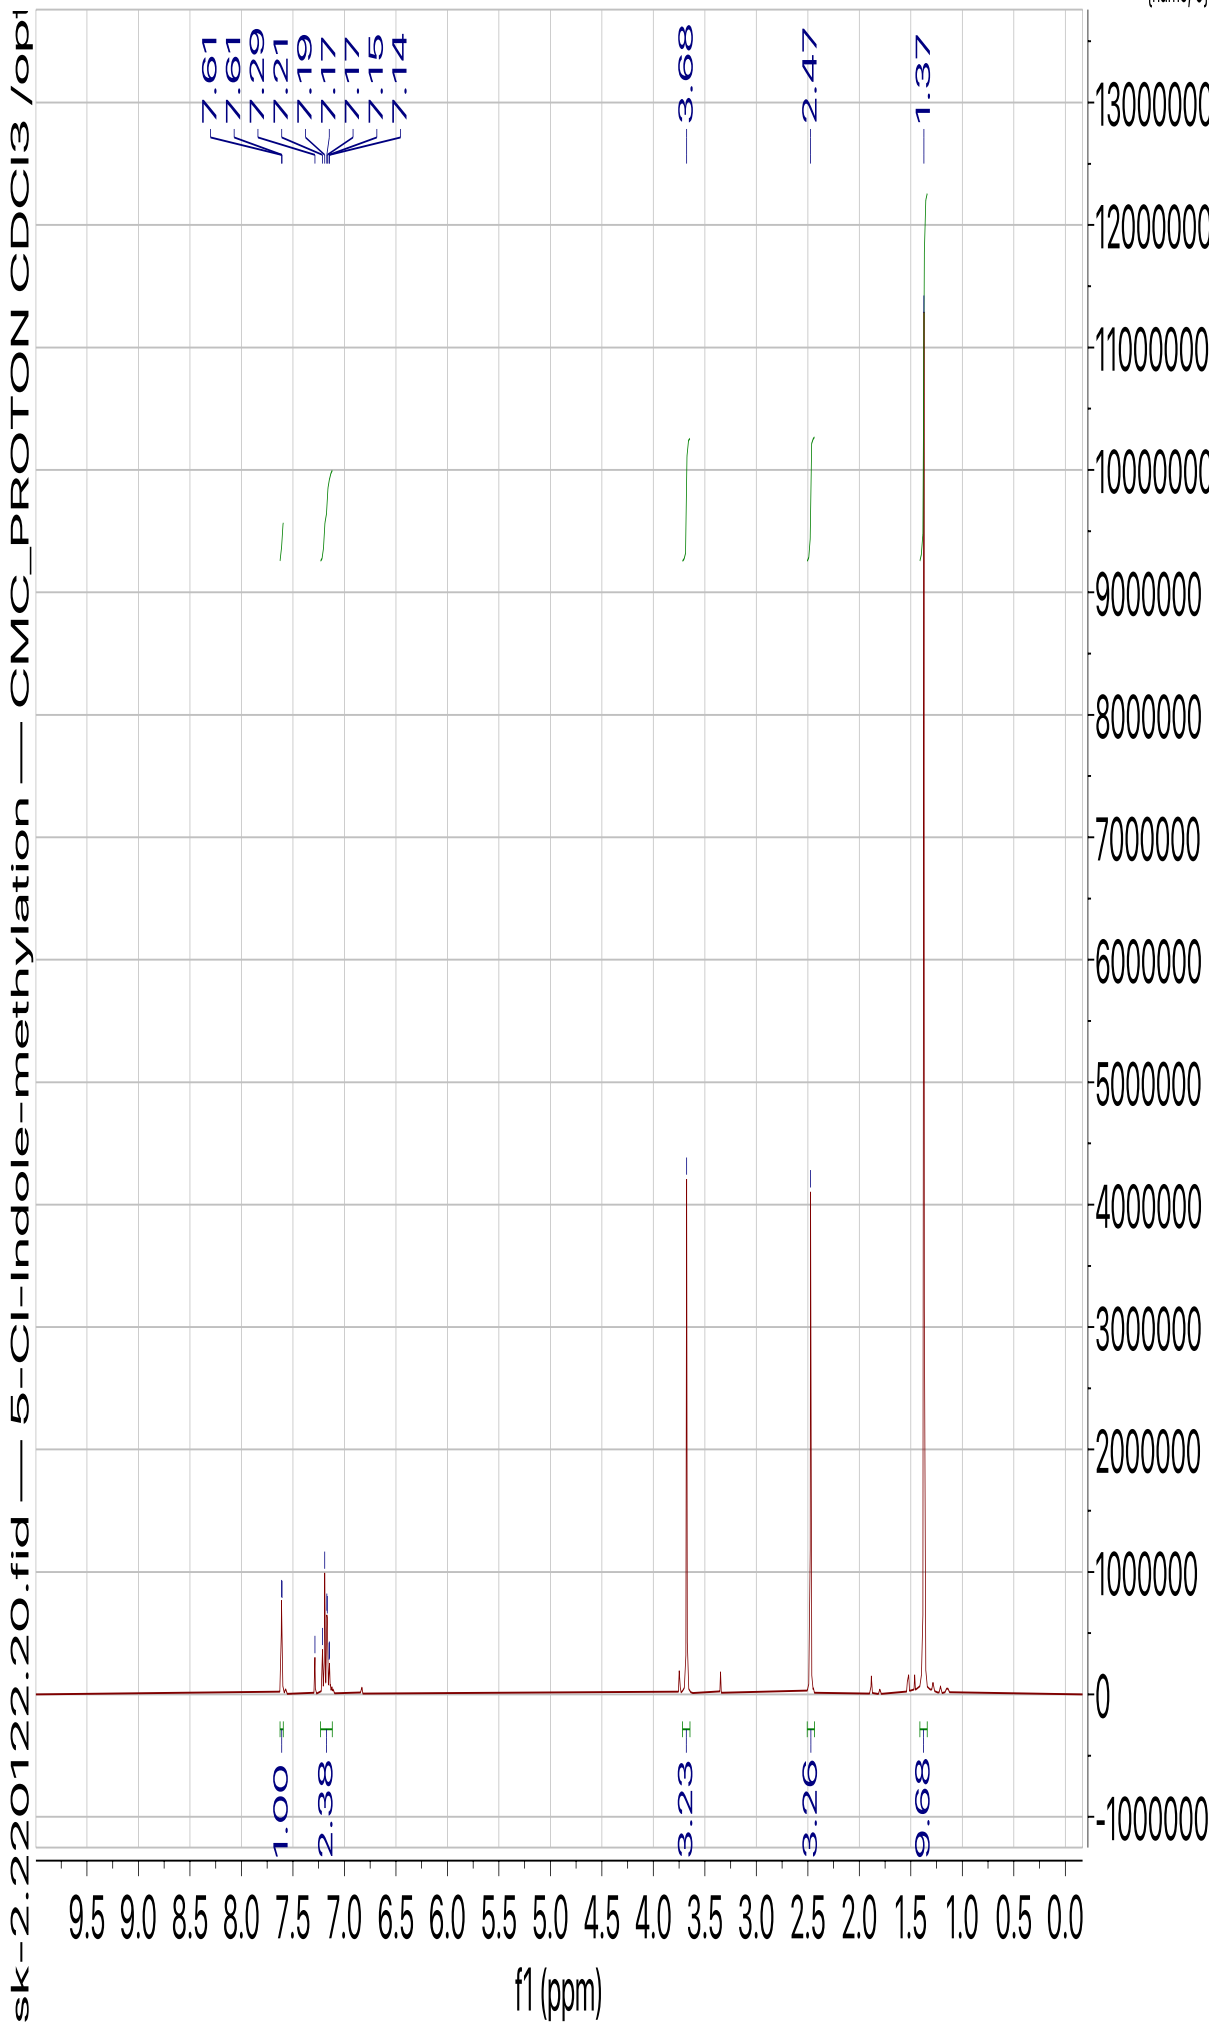

3i, <sup>13</sup>C NMR (101 MHz, CDCl<sub>3</sub>)

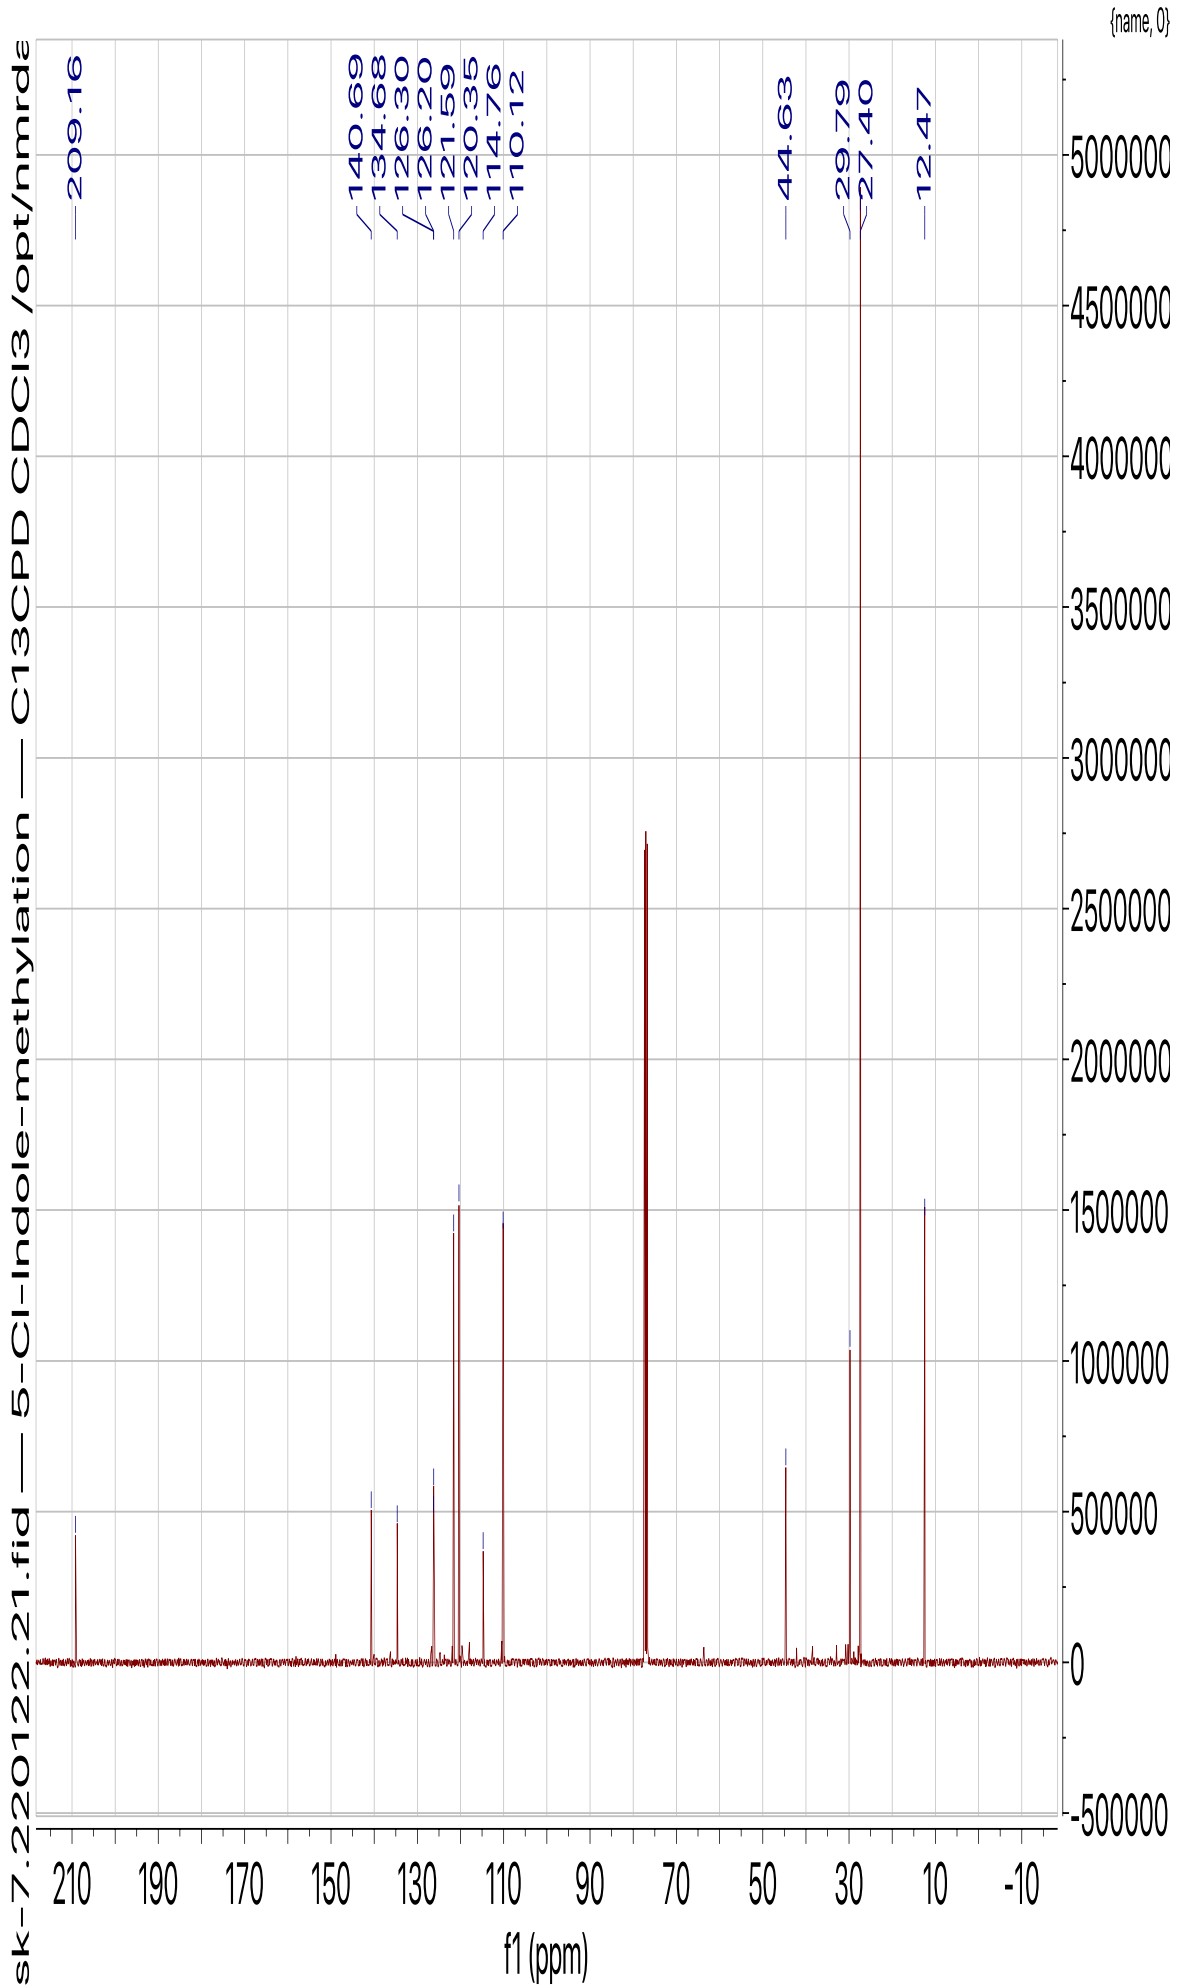

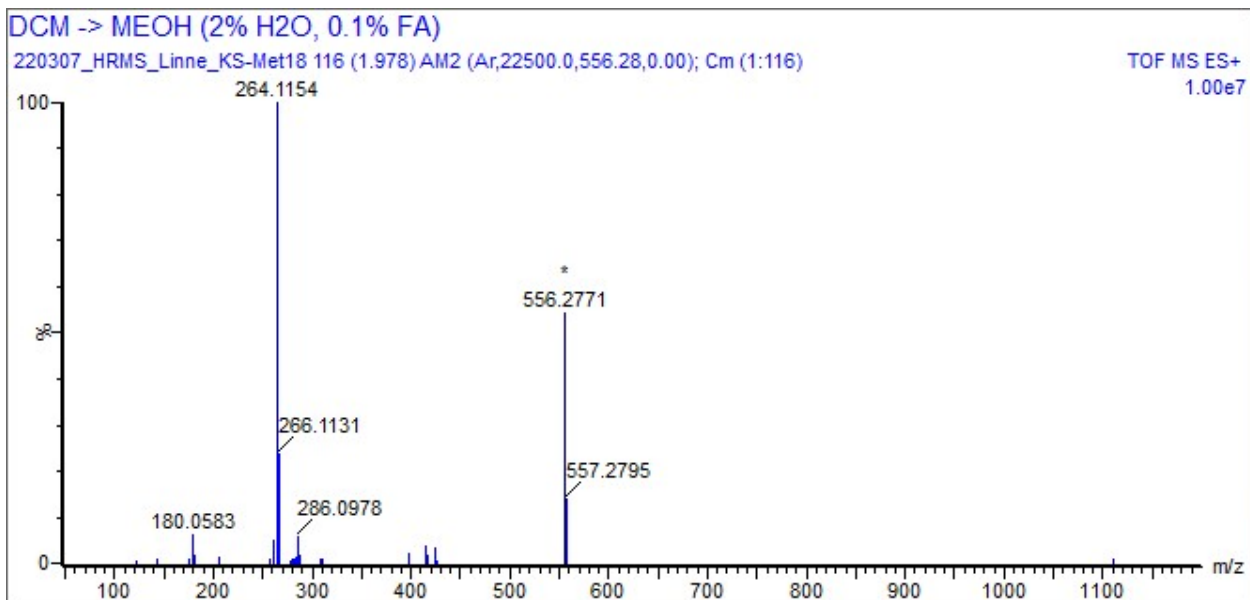

### Single Mass Analysis

Tolerance = 2.0 mDa / DBE: min = -1.5, max = 100.0

Element prediction: Off

Number of isotope peaks used for i-FIT = 2

Monoisotopic Mass, Even Electron Ions

189 formula(e) evaluated with 2 results within limits (all results (up to 1000) for each mass)

Elements Used:

C: 0-60      H: 0-100      N: 0-3      O: 0-4      Cl: 0-2

| Mass     | Calc. Mass | mDa  | PPM  | DBE  | Formula        | i-F... | i-FIT ... | Fit Conf % | C  | H  | N | O | Cl |
|----------|------------|------|------|------|----------------|--------|-----------|------------|----|----|---|---|----|
| 264.1154 | 264.1155   | -0.1 | -0.4 | 6.5  | C15 H19 N O Cl | 27.7   | 0.050     | 95.10      | 15 | 19 | 1 | 1 | 1  |
|          | 264.1137   | 1.7  | 6.4  | 11.5 | C16 H14 N3 O   | 30.6   | 3.016     | 4.90       | 16 | 14 | 3 | 1 |    |

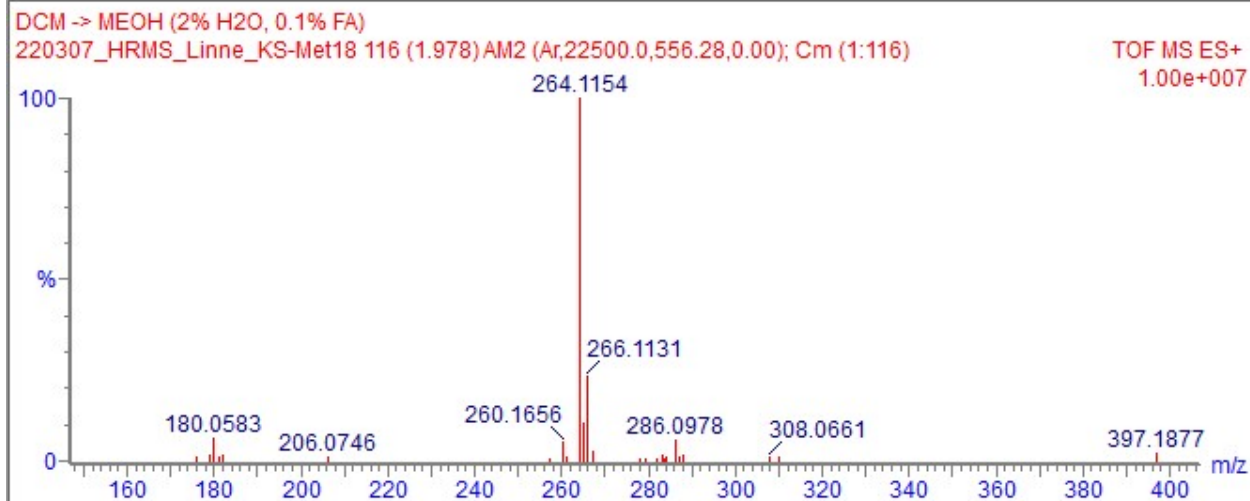

HRMS spectra of **3i**

sk-5.221220.30.fid — 6-Cl-indole-methylation — PROTON CDCI3 {D:\nmrd:

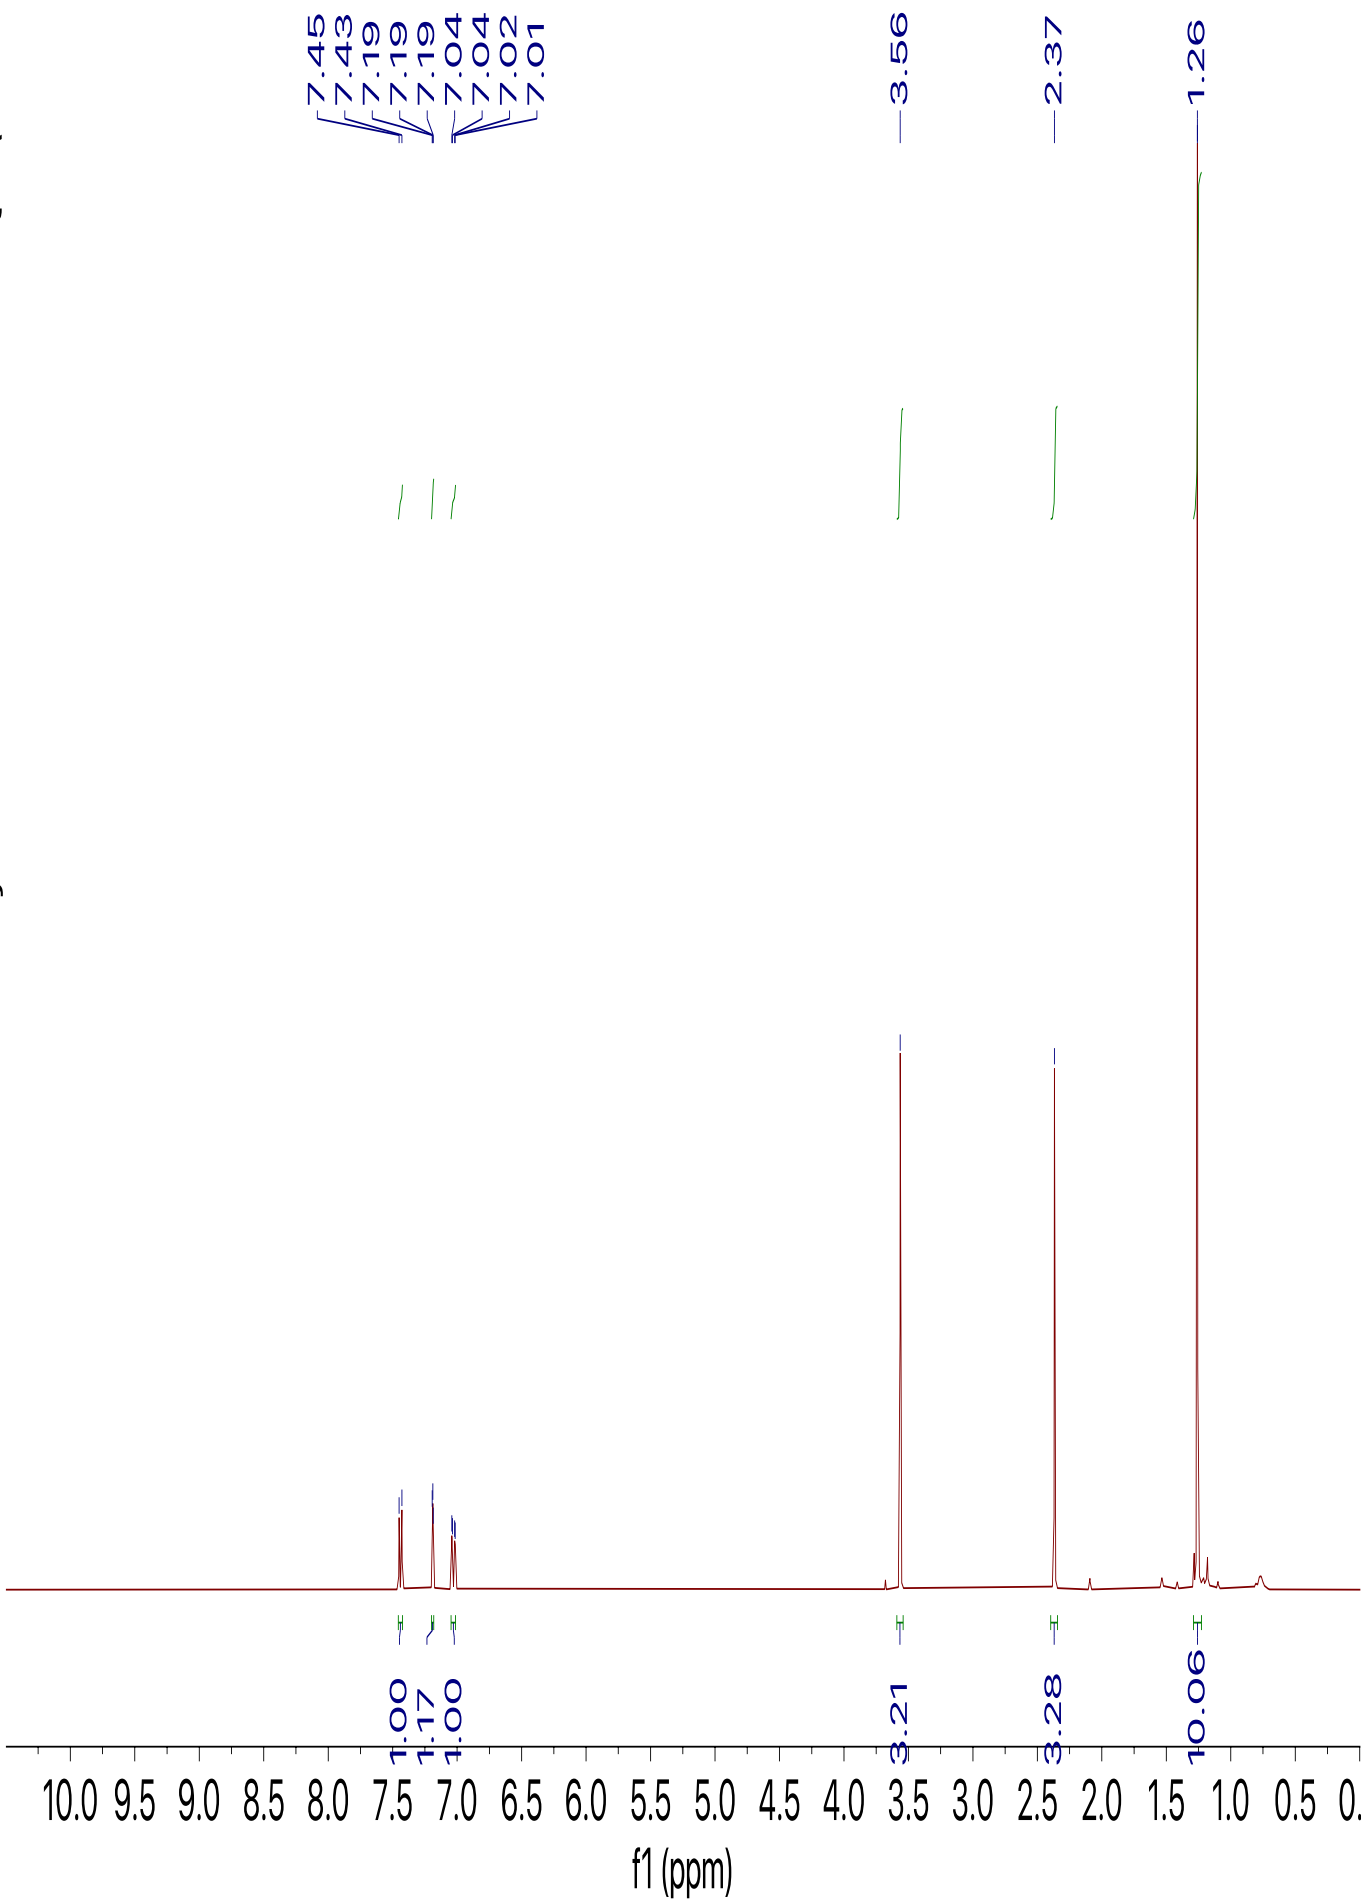

sk-6.221220.31.fid — 6-Cl-indole-methylation — C13CPD CDCl3 {D:\nmrda

3j, <sup>13</sup>C NMR (101 MHz, CDCl<sub>3</sub>)

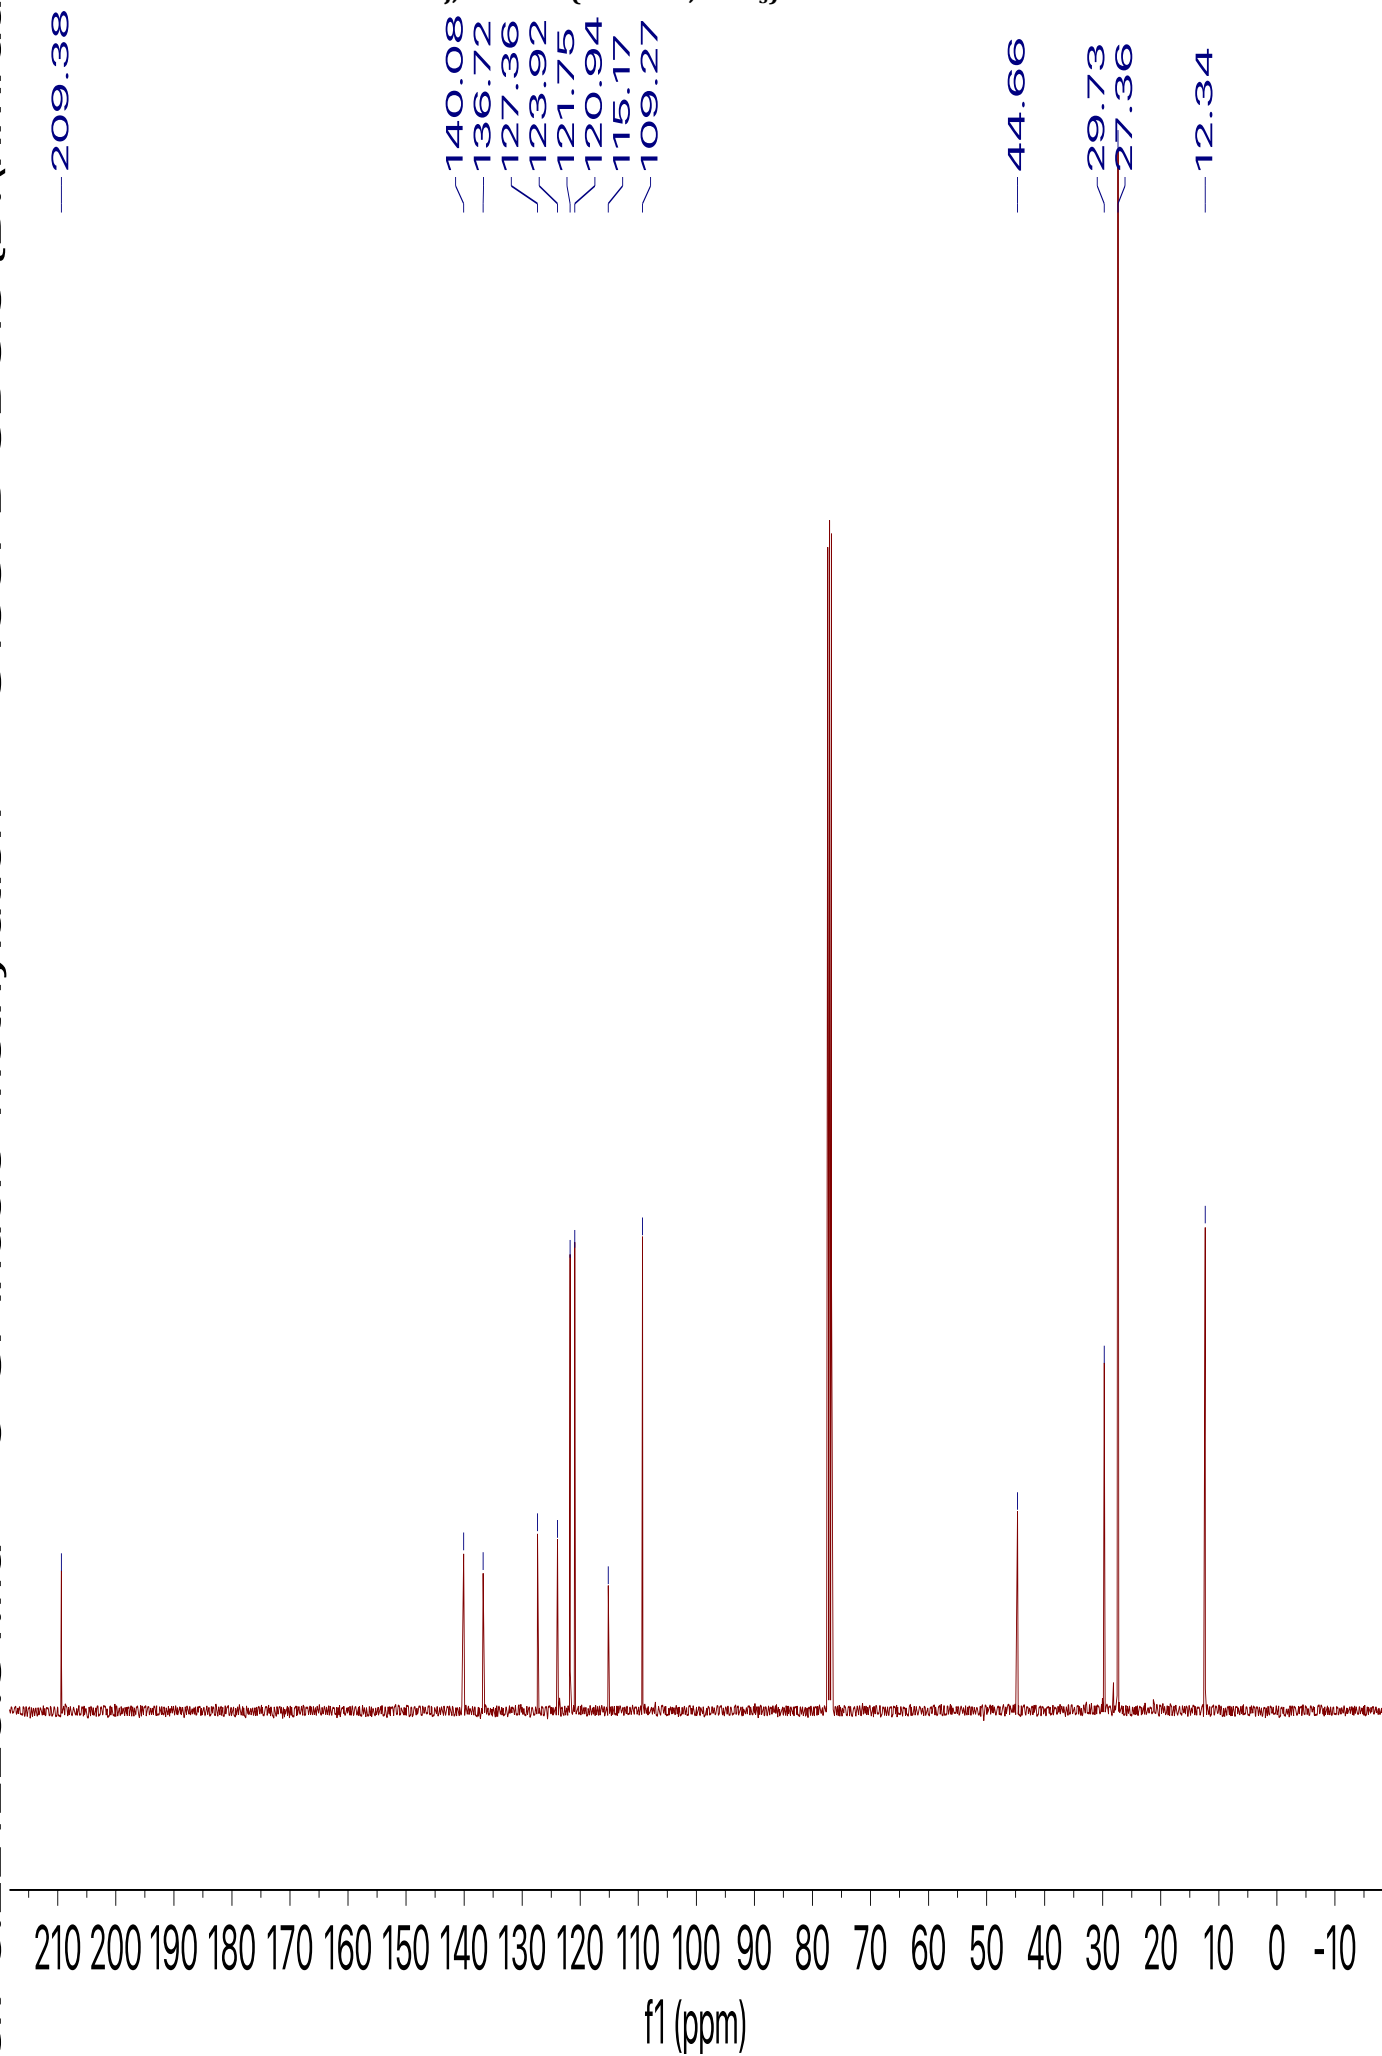

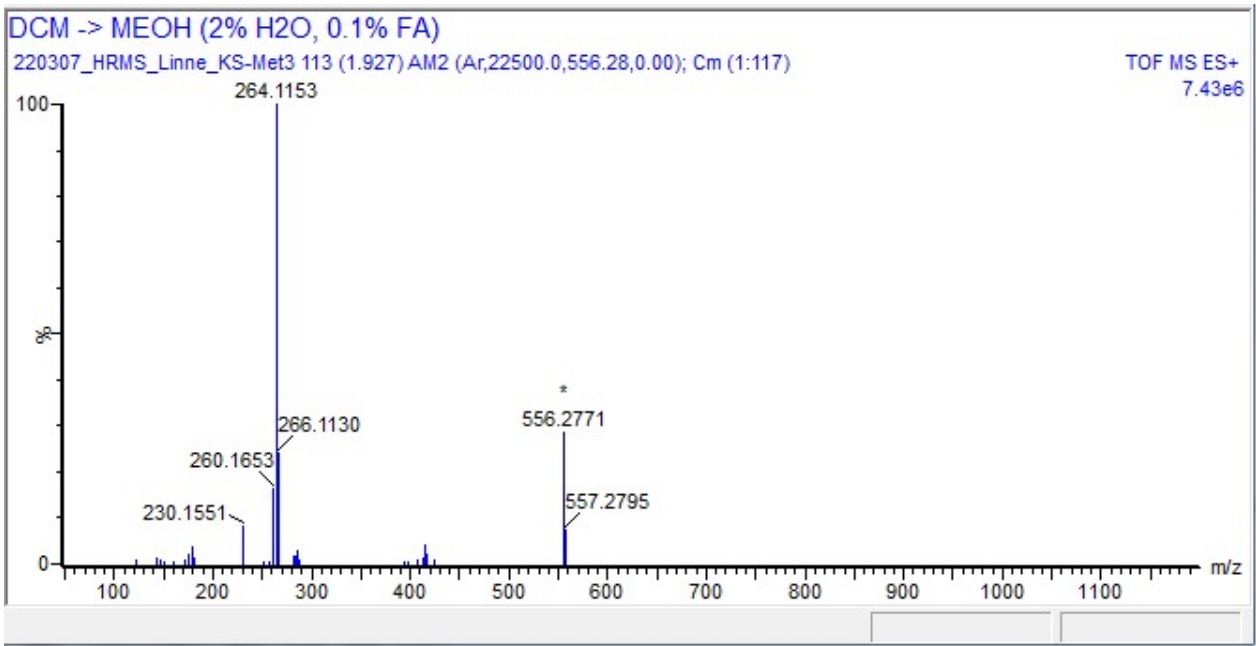

### Single Mass Analysis

Tolerance = 2.0 mDa / DBE: min = -1.5, max = 100.0

Element prediction: Off

Number of isotope peaks used for i-FIT = 2

Monoisotopic Mass, Even Electron Ions

189 formula(e) evaluated with 2 results within limits (all results (up to 1000) for each mass)

Elements Used:

C: 0-60      H: 0-100      N: 0-3      O: 0-4      Cl: 0-2

| Mass     | Calc. Mass | mDa  | PPM  | DBE  | Formula        | i...  | Fit Conf % | C  | H  | N | O | Cl |
|----------|------------|------|------|------|----------------|-------|------------|----|----|---|---|----|
| 264.1153 | 264.1155   | -0.2 | -0.8 | 6.5  | C15 H19 N O Cl | 20... | 92.79      | 15 | 19 | 1 | 1 | 1  |
|          | 264.1137   | 1.6  | 6.1  | 11.5 | C16 H14 N3 O   | 32... | 7.21       | 16 | 14 | 3 | 1 |    |

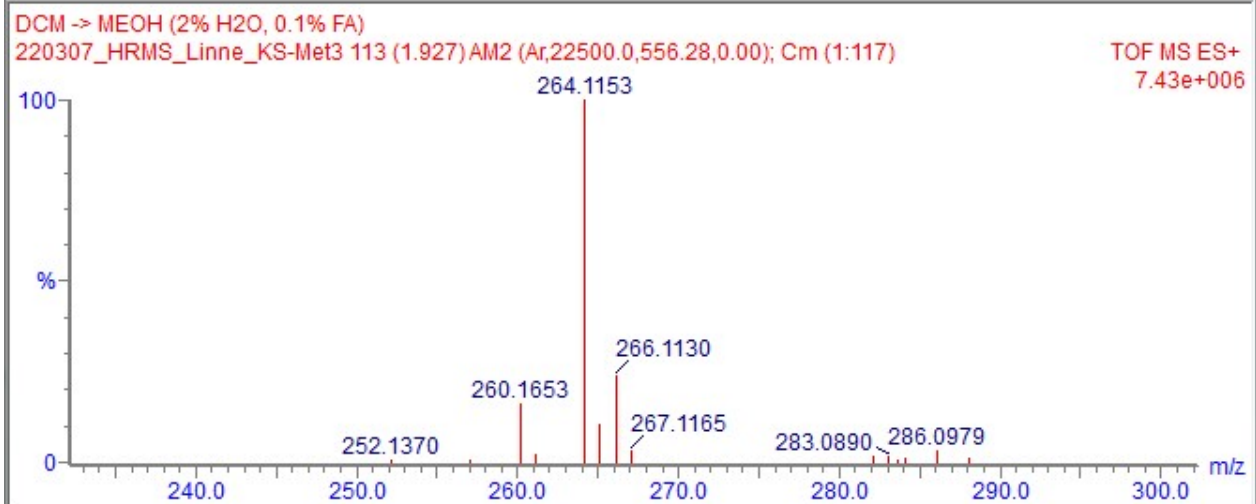

HRMS spectra of **3j**

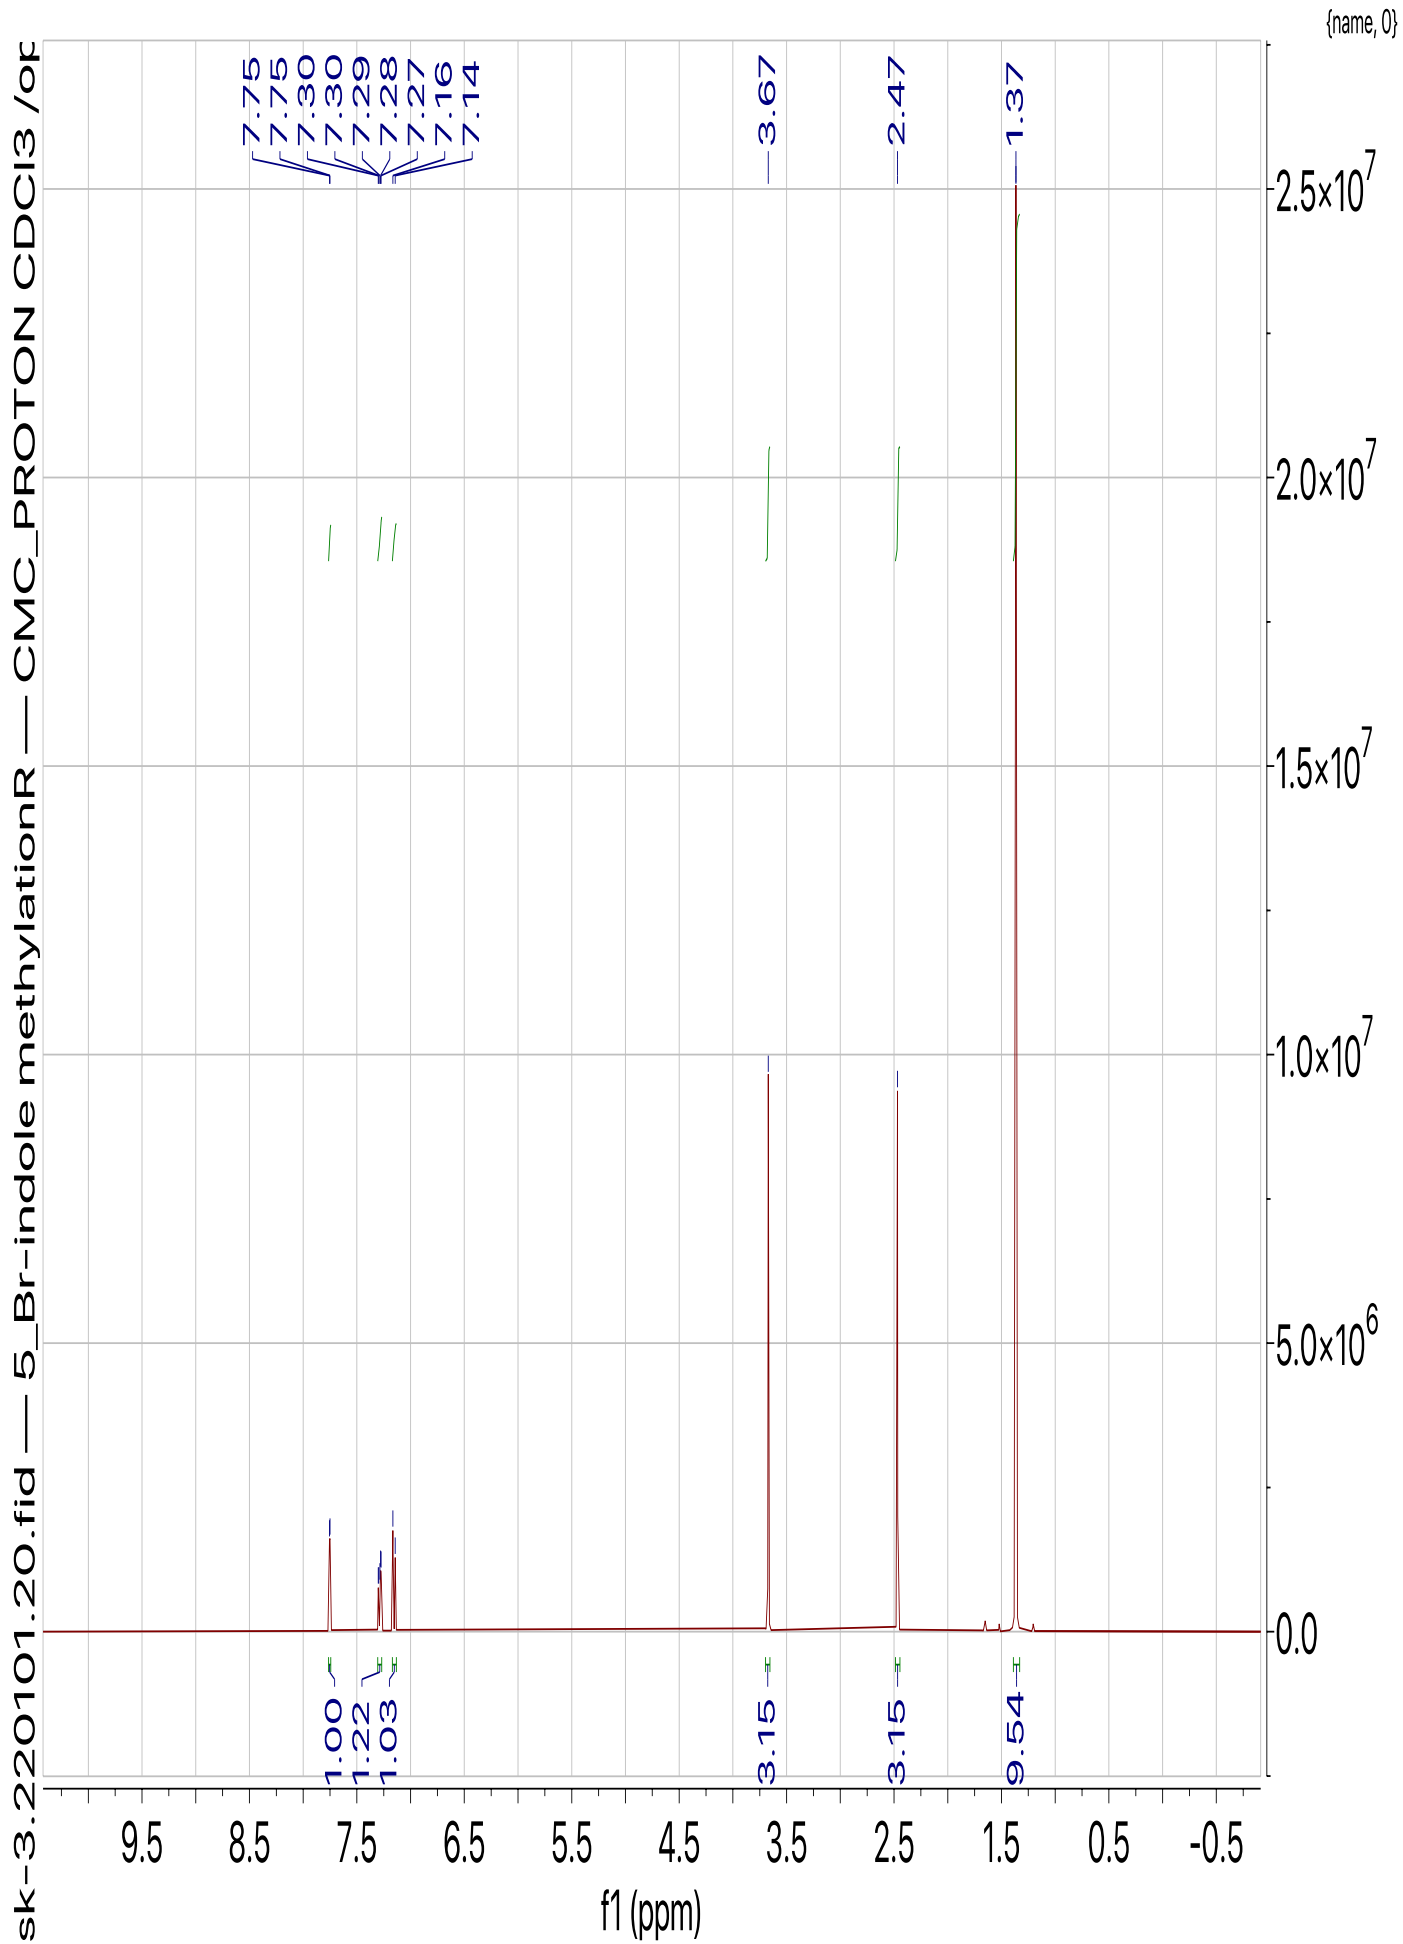

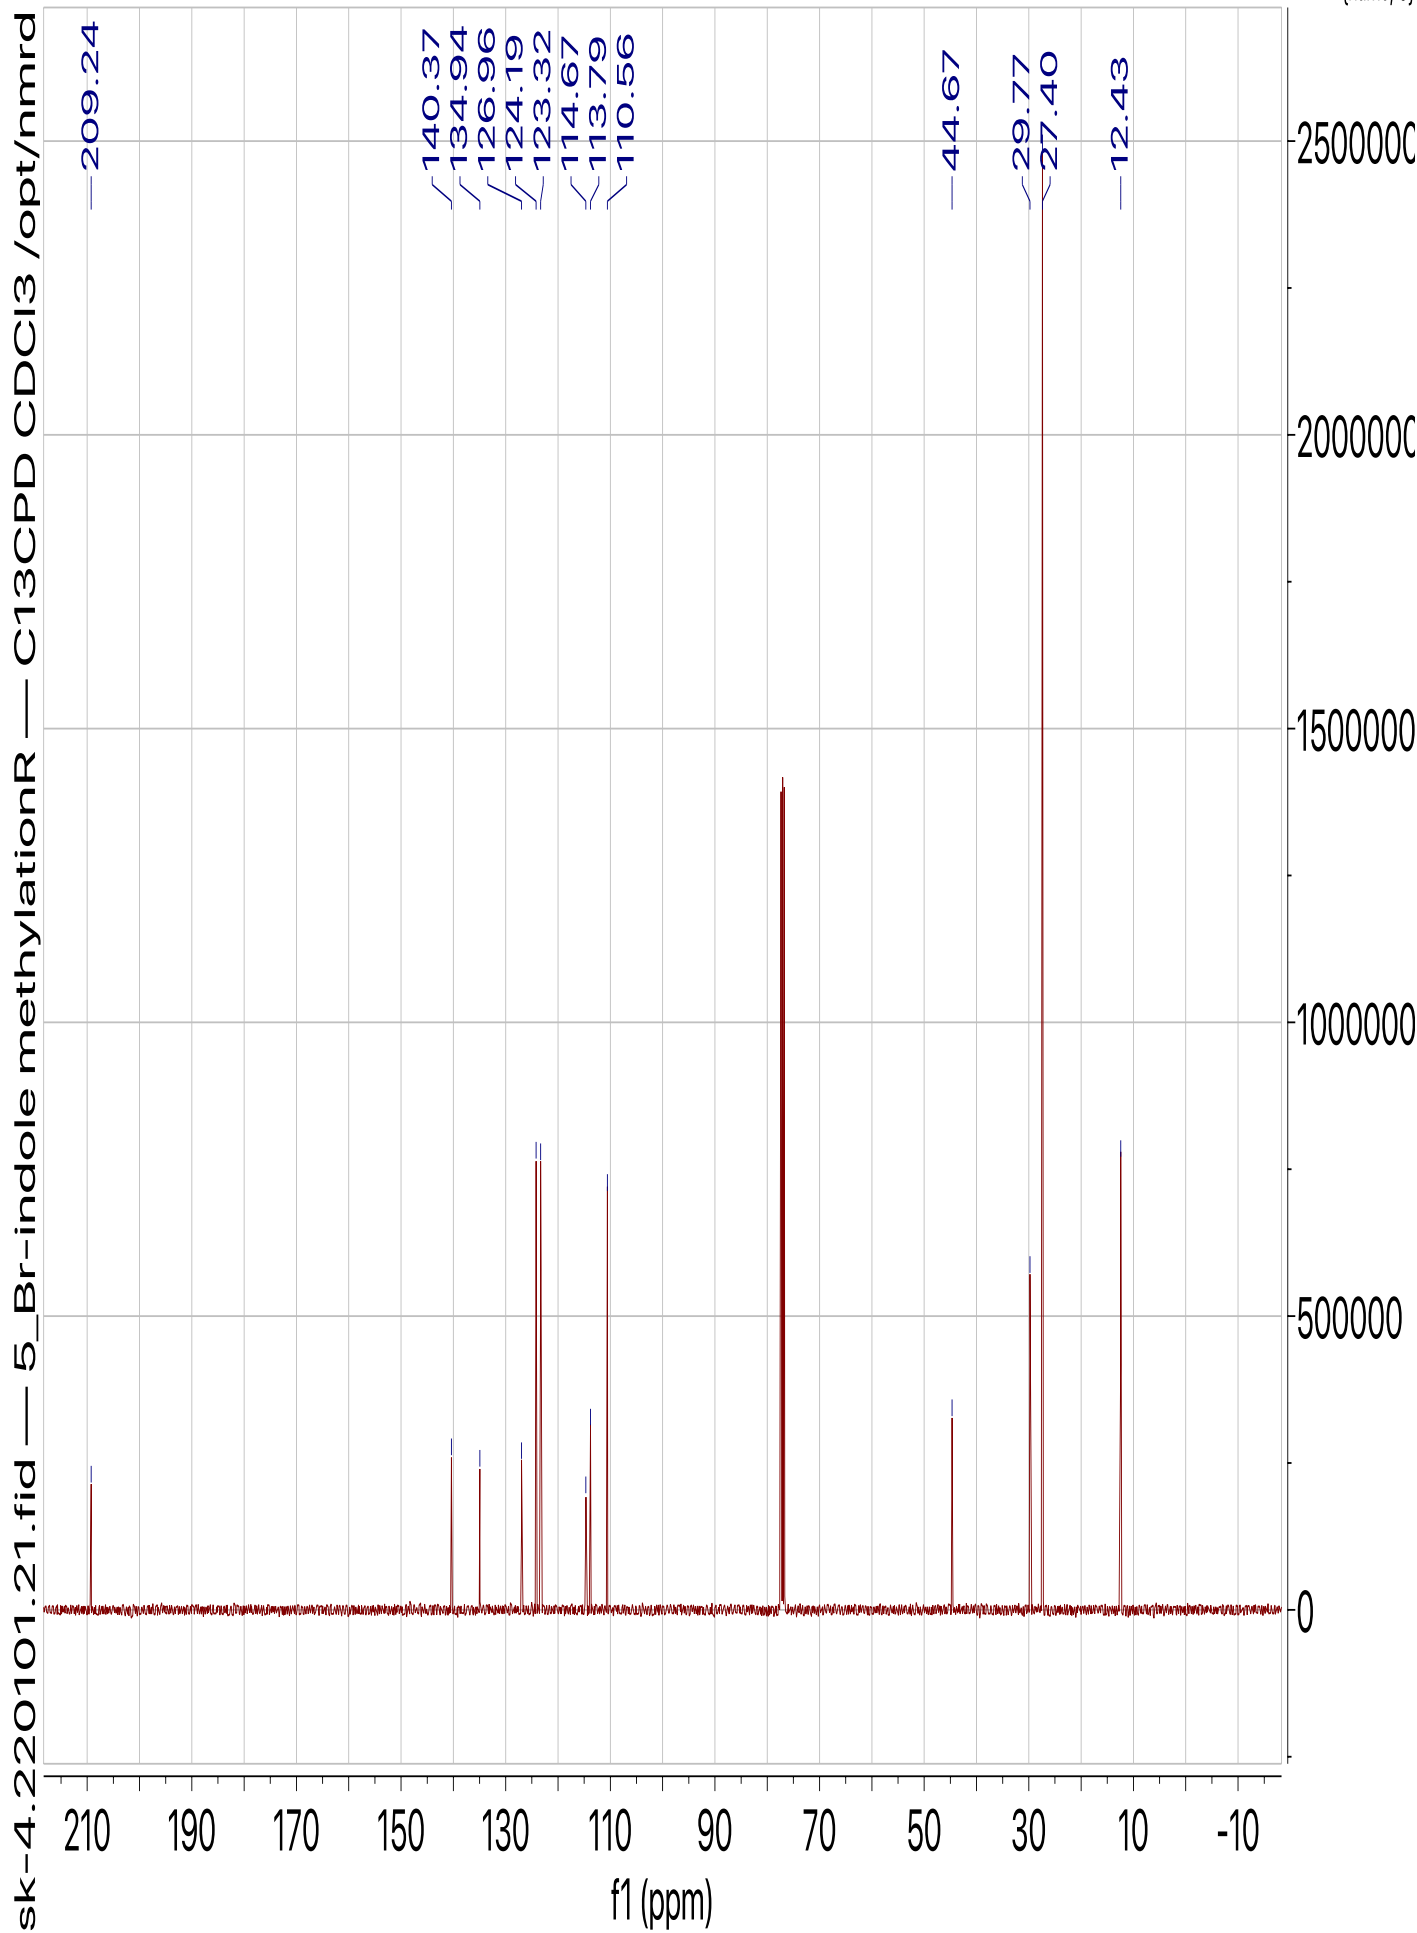



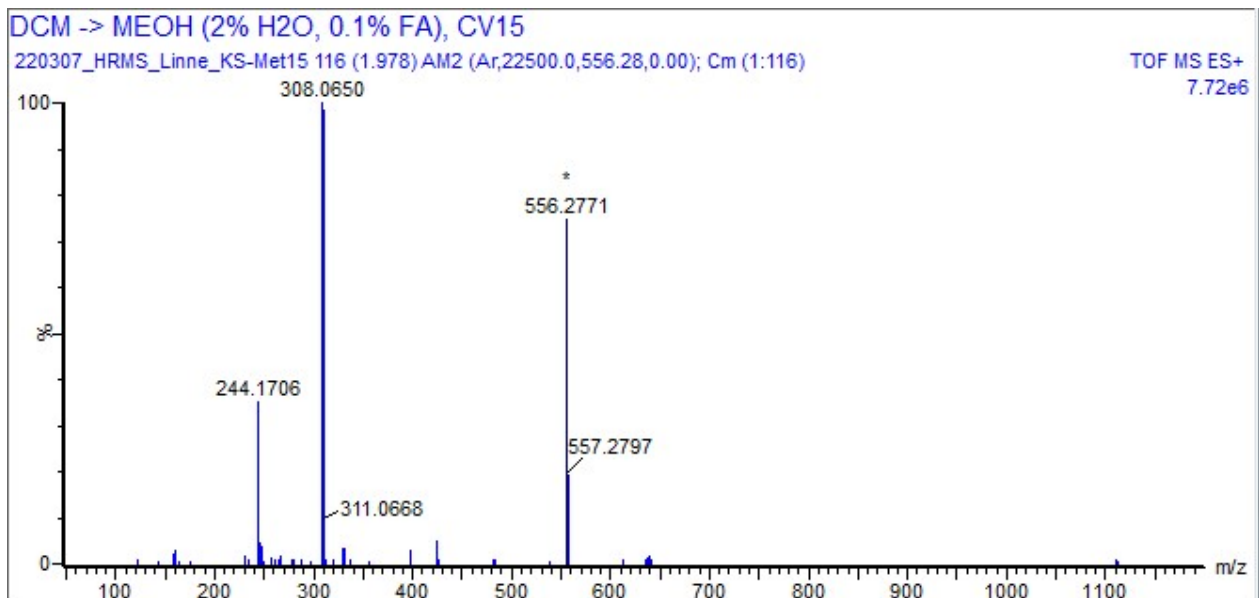

### Single Mass Analysis

Tolerance = 2.0 mDa / DBE: min = -1.5, max = 100.0

Element prediction: Off

Number of isotope peaks used for i-FIT = 2

Monoisotopic Mass, Even Electron Ions

147 formula(e) evaluated with 1 results within limits (all results (up to 1000) for each mass)

Elements Used:

C: 0-60      H: 0-100      N: 0-3      O: 0-4      Br: 0-1

| Mass     | Calc. Mass | mDa | PPM | DBE | Formula                                | i-FIT | i... | Fit Conf % | C  | H  | N | O | Br |
|----------|------------|-----|-----|-----|----------------------------------------|-------|------|------------|----|----|---|---|----|
| 308.0650 | 308.0650   | 0.0 | 0.0 | 6.5 | C <sub>15</sub> H <sub>19</sub> N O Br | 28.4  | n... | n/a        | 15 | 19 | 1 | 1 | 1  |

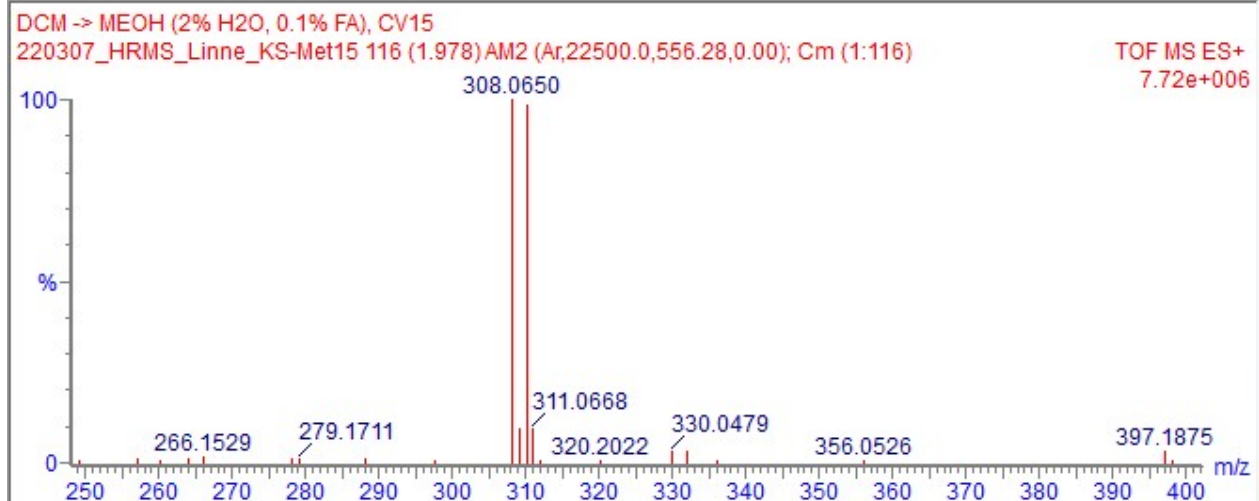

HRMS spectra of **3k**

31, <sup>1</sup>H NMR, CDCl<sub>3</sub>, 400 MHz  
Minor C2 isomer also observed

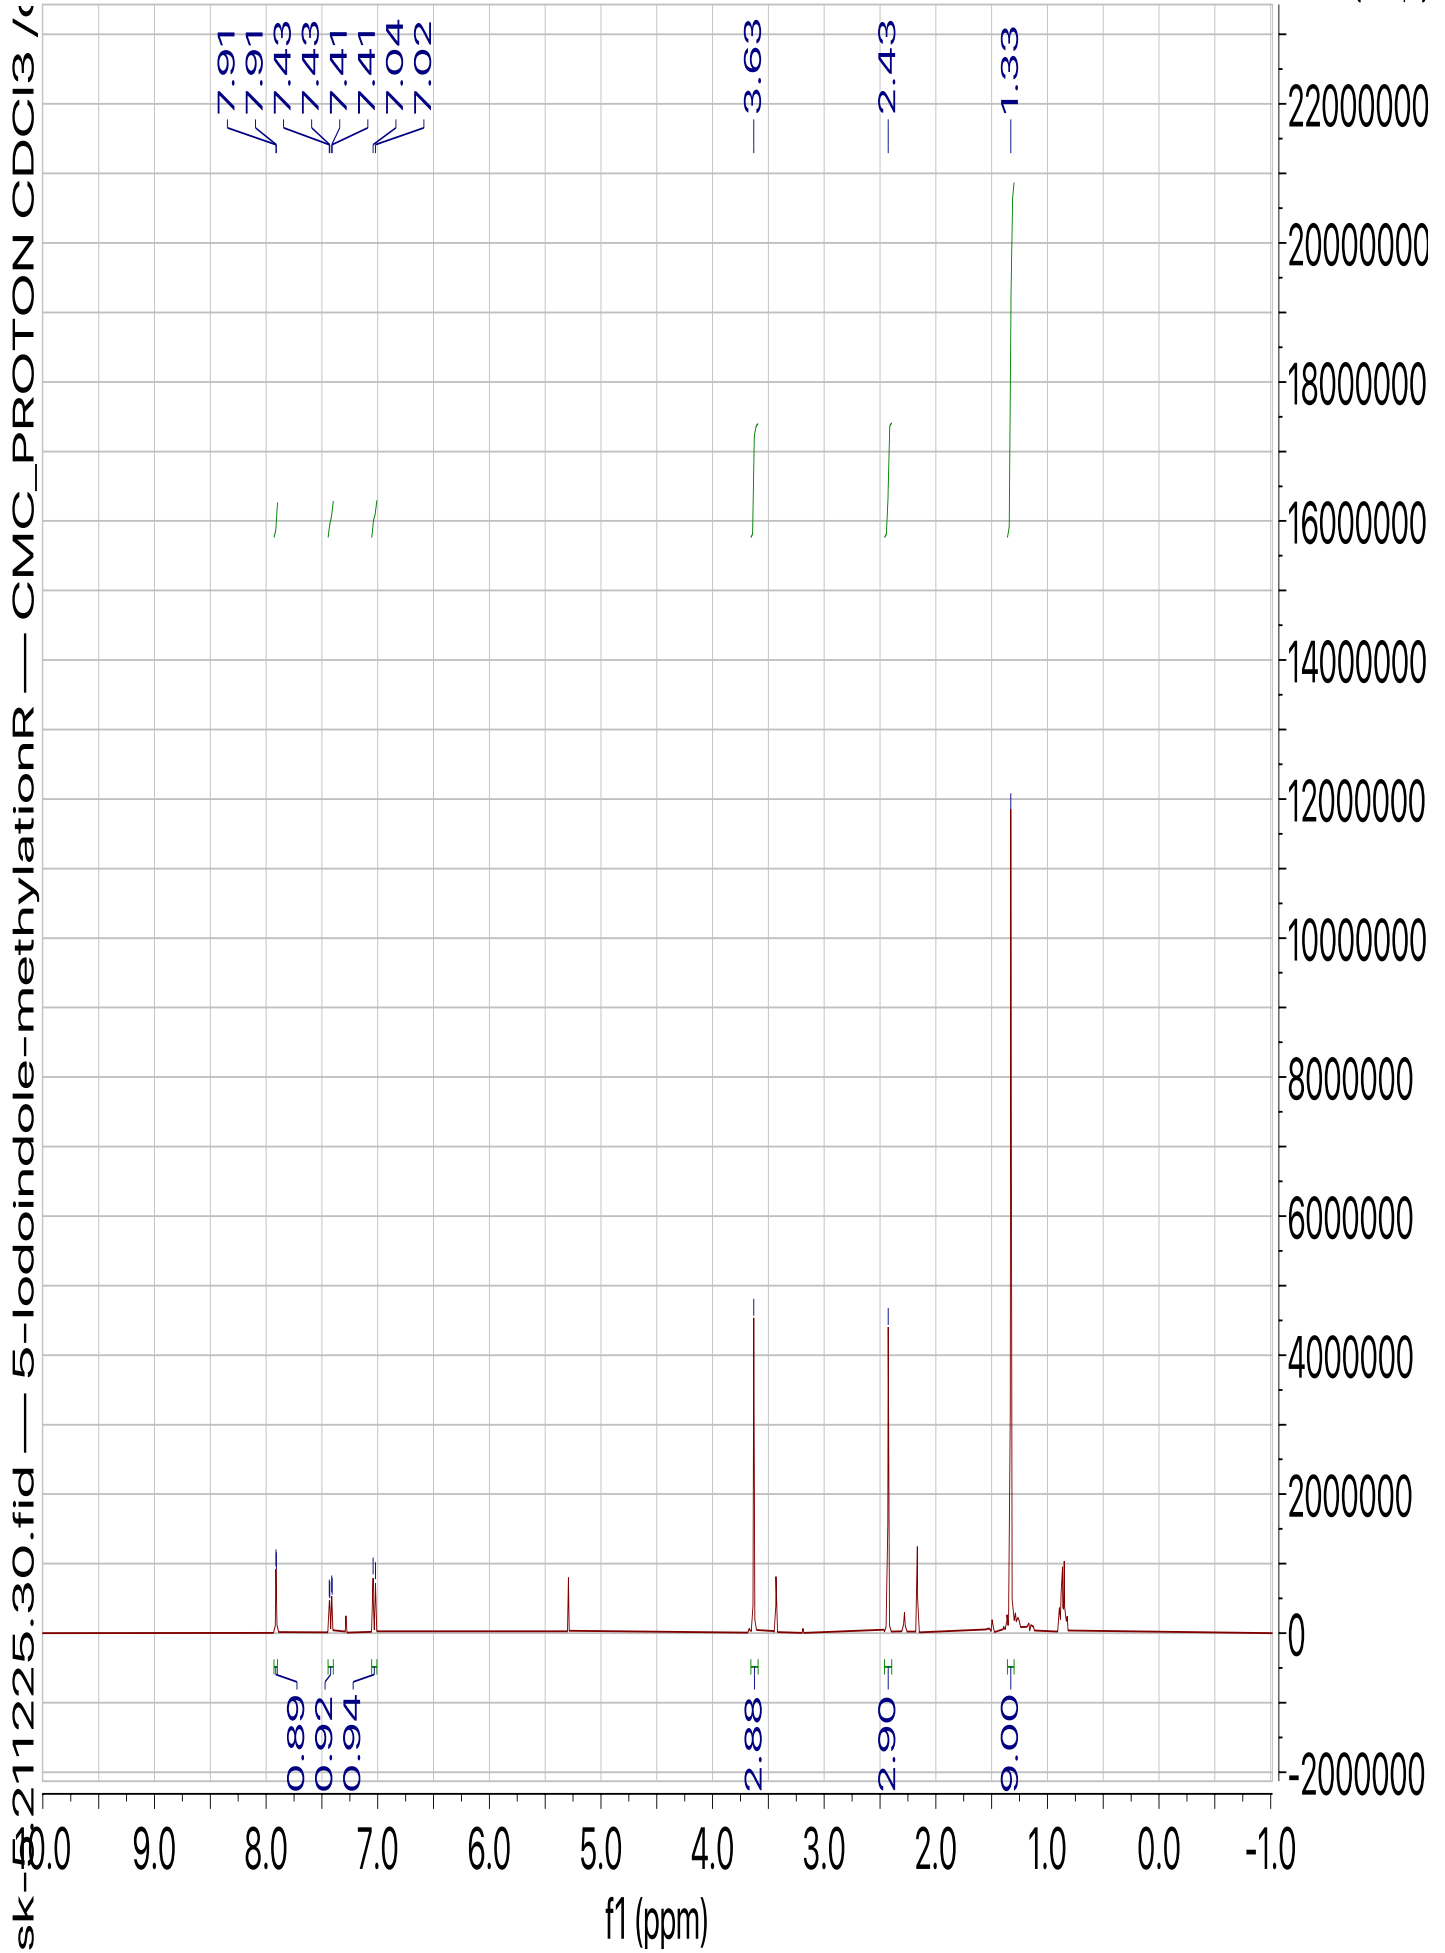

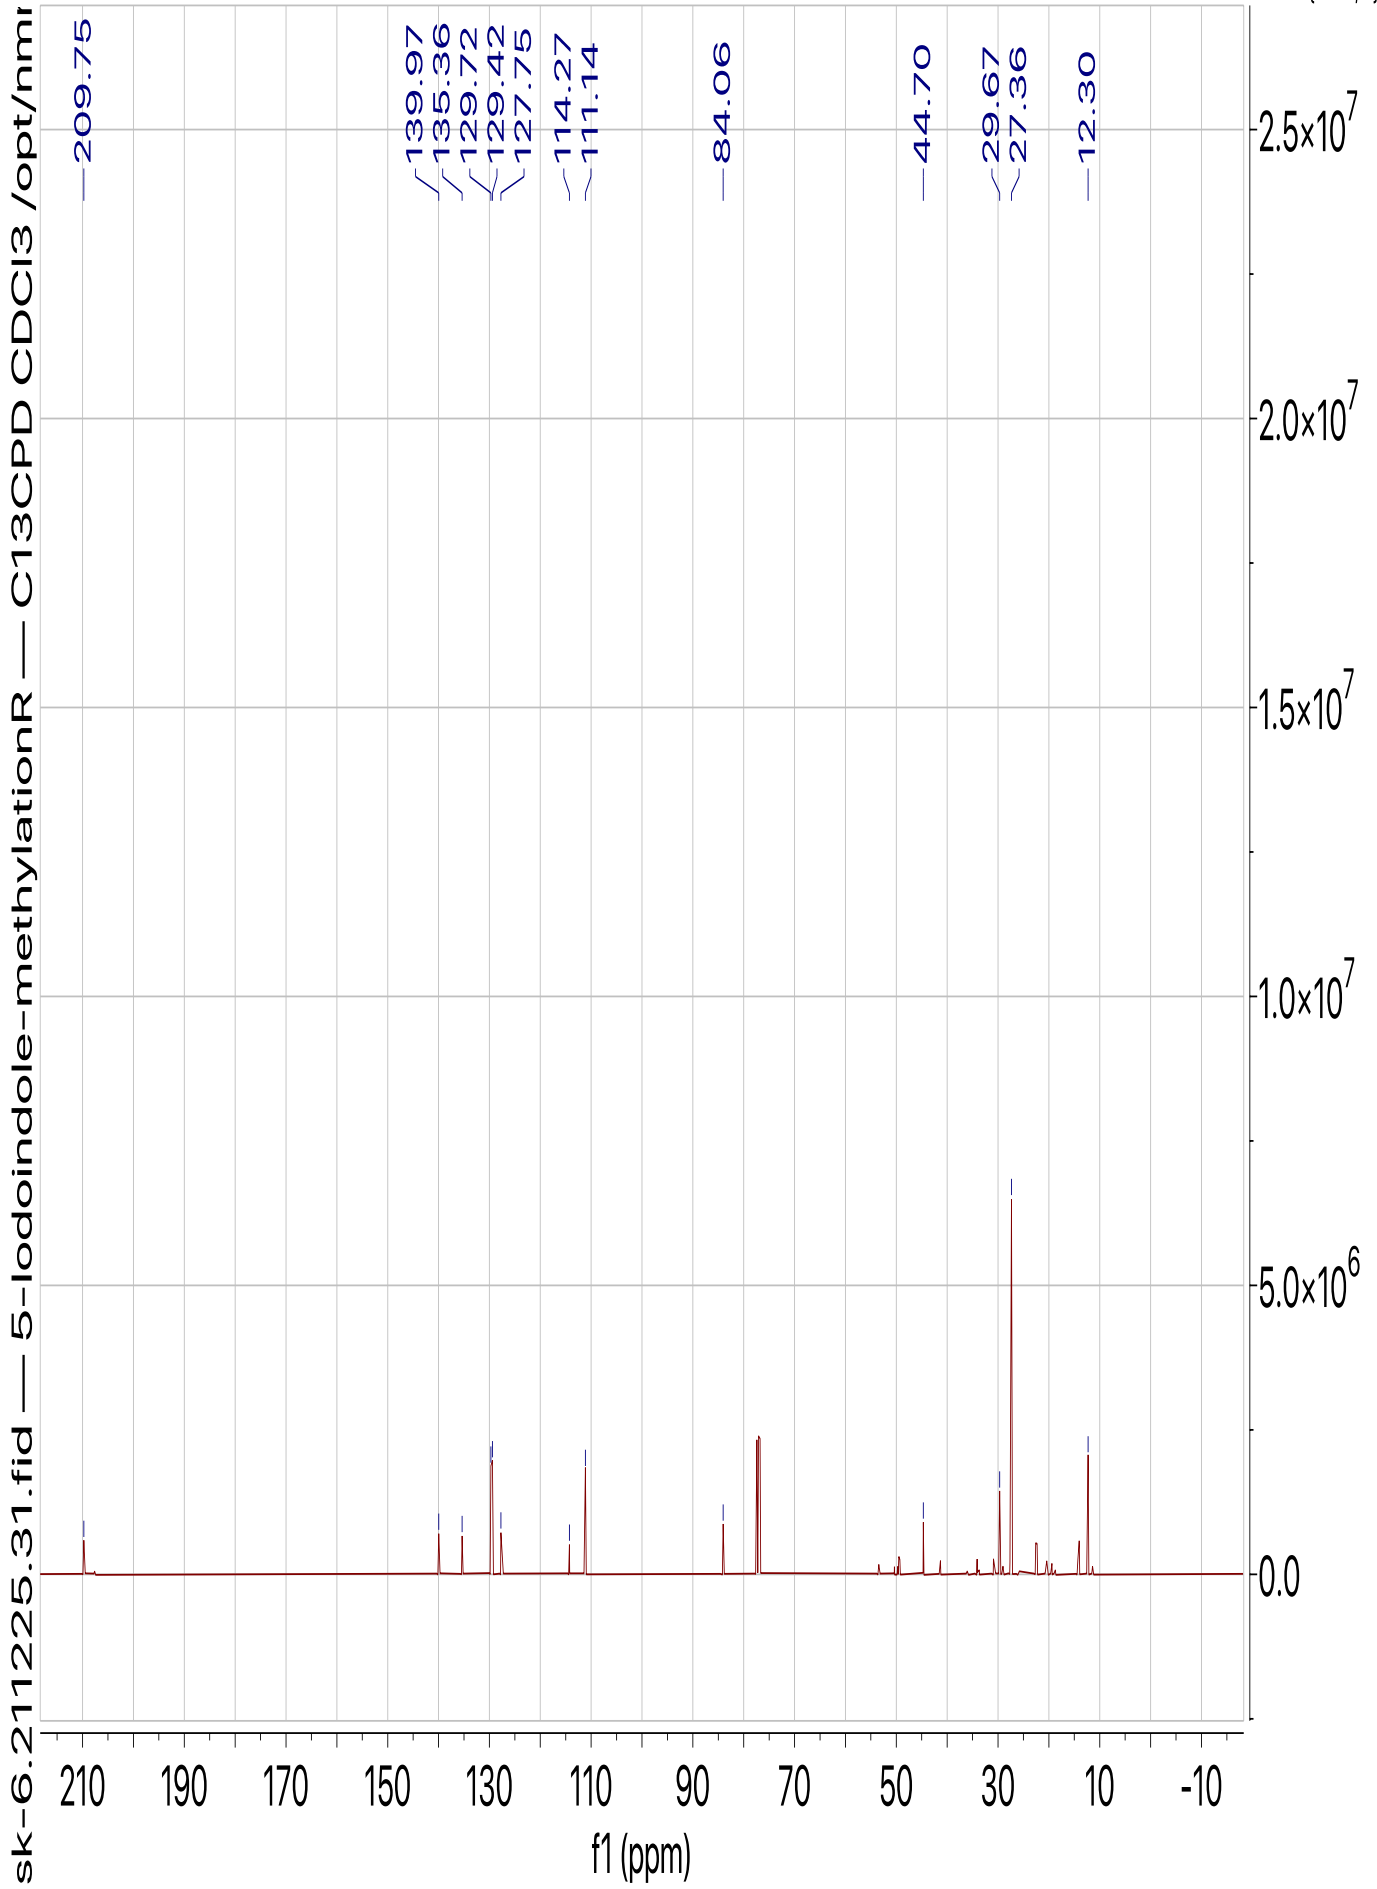

DCM -> MEOH (2% H2O, 0.1% FA)

220307\_HRMS\_Linne\_KS-Met4 117 (1.995) AM2 (Ar,22500.0,556.28,0.00); Cm (1:117)

TOF MS ES+  
9.51e6

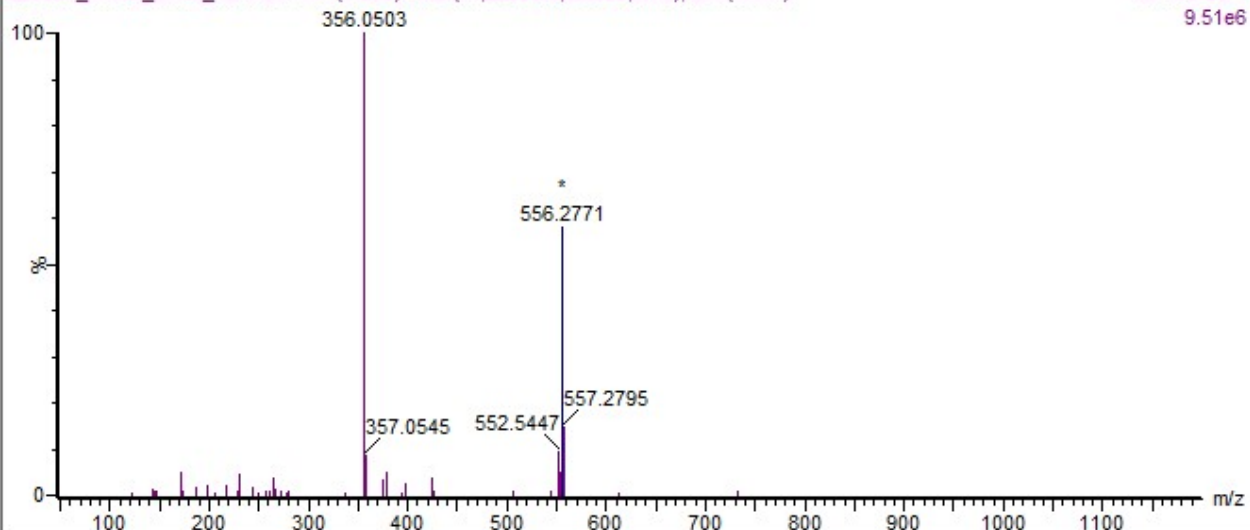

**Single Mass Analysis**

Tolerance = 2.0 mDa / DBE: min = -1.5, max = 100.0

Element prediction: Off

Number of isotope peaks used for i-FIT = 2

Monoisotopic Mass, Even Electron Ions

155 formula(e) evaluated with 2 results within limits (all results (up to 1000) for each mass)

Elements Used:

C: 0-60      H: 0-100      N: 0-3      O: 0-4      I: 0-1

| Mass     | Calc. Mass | mDa  | PPM  | DBE  | Formula                               | i-FIT ... | Fit Conf % | C  | H  | N | O | I |
|----------|------------|------|------|------|---------------------------------------|-----------|------------|----|----|---|---|---|
| 356.0503 | 356.0500   | 0.3  | 0.8  | 26.5 | C <sub>28</sub> H <sub>6</sub> N      | 32.491    | 8.28       | 28 | 6  | 1 |   |   |
|          | 356.0511   | -0.8 | -2.2 | 6.5  | C <sub>15</sub> H <sub>19</sub> N O I | 20.086    | 91.72      | 15 | 19 | 1 | 1 | 1 |

DCM -> MEOH (2% H2O, 0.1% FA)

220307\_HRMS\_Linne\_KS-Met4 117 (1.995) AM2 (Ar,22500.0,556.28,0.00); Cm (1:117)

TOF MS ES+  
9.51e+006

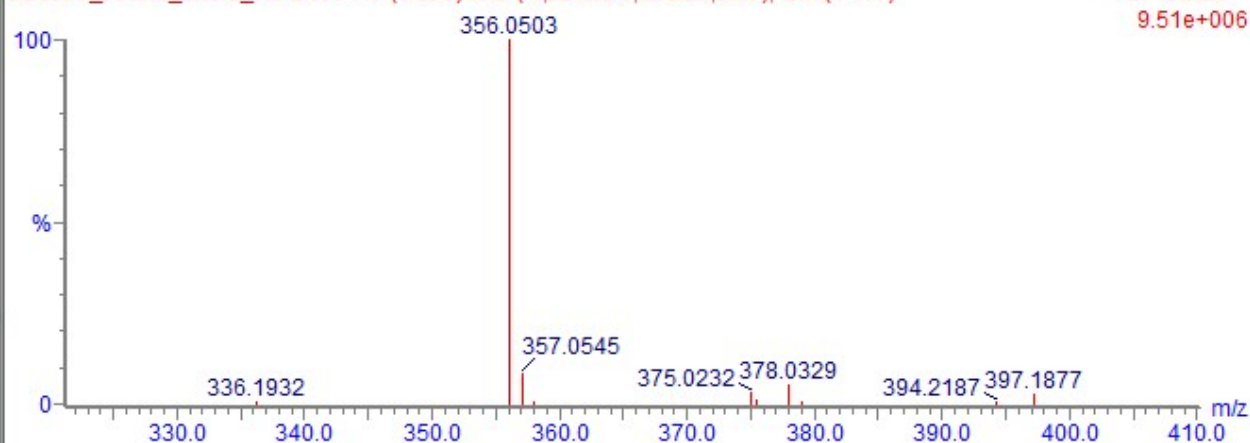

HRMS spectra of **31**

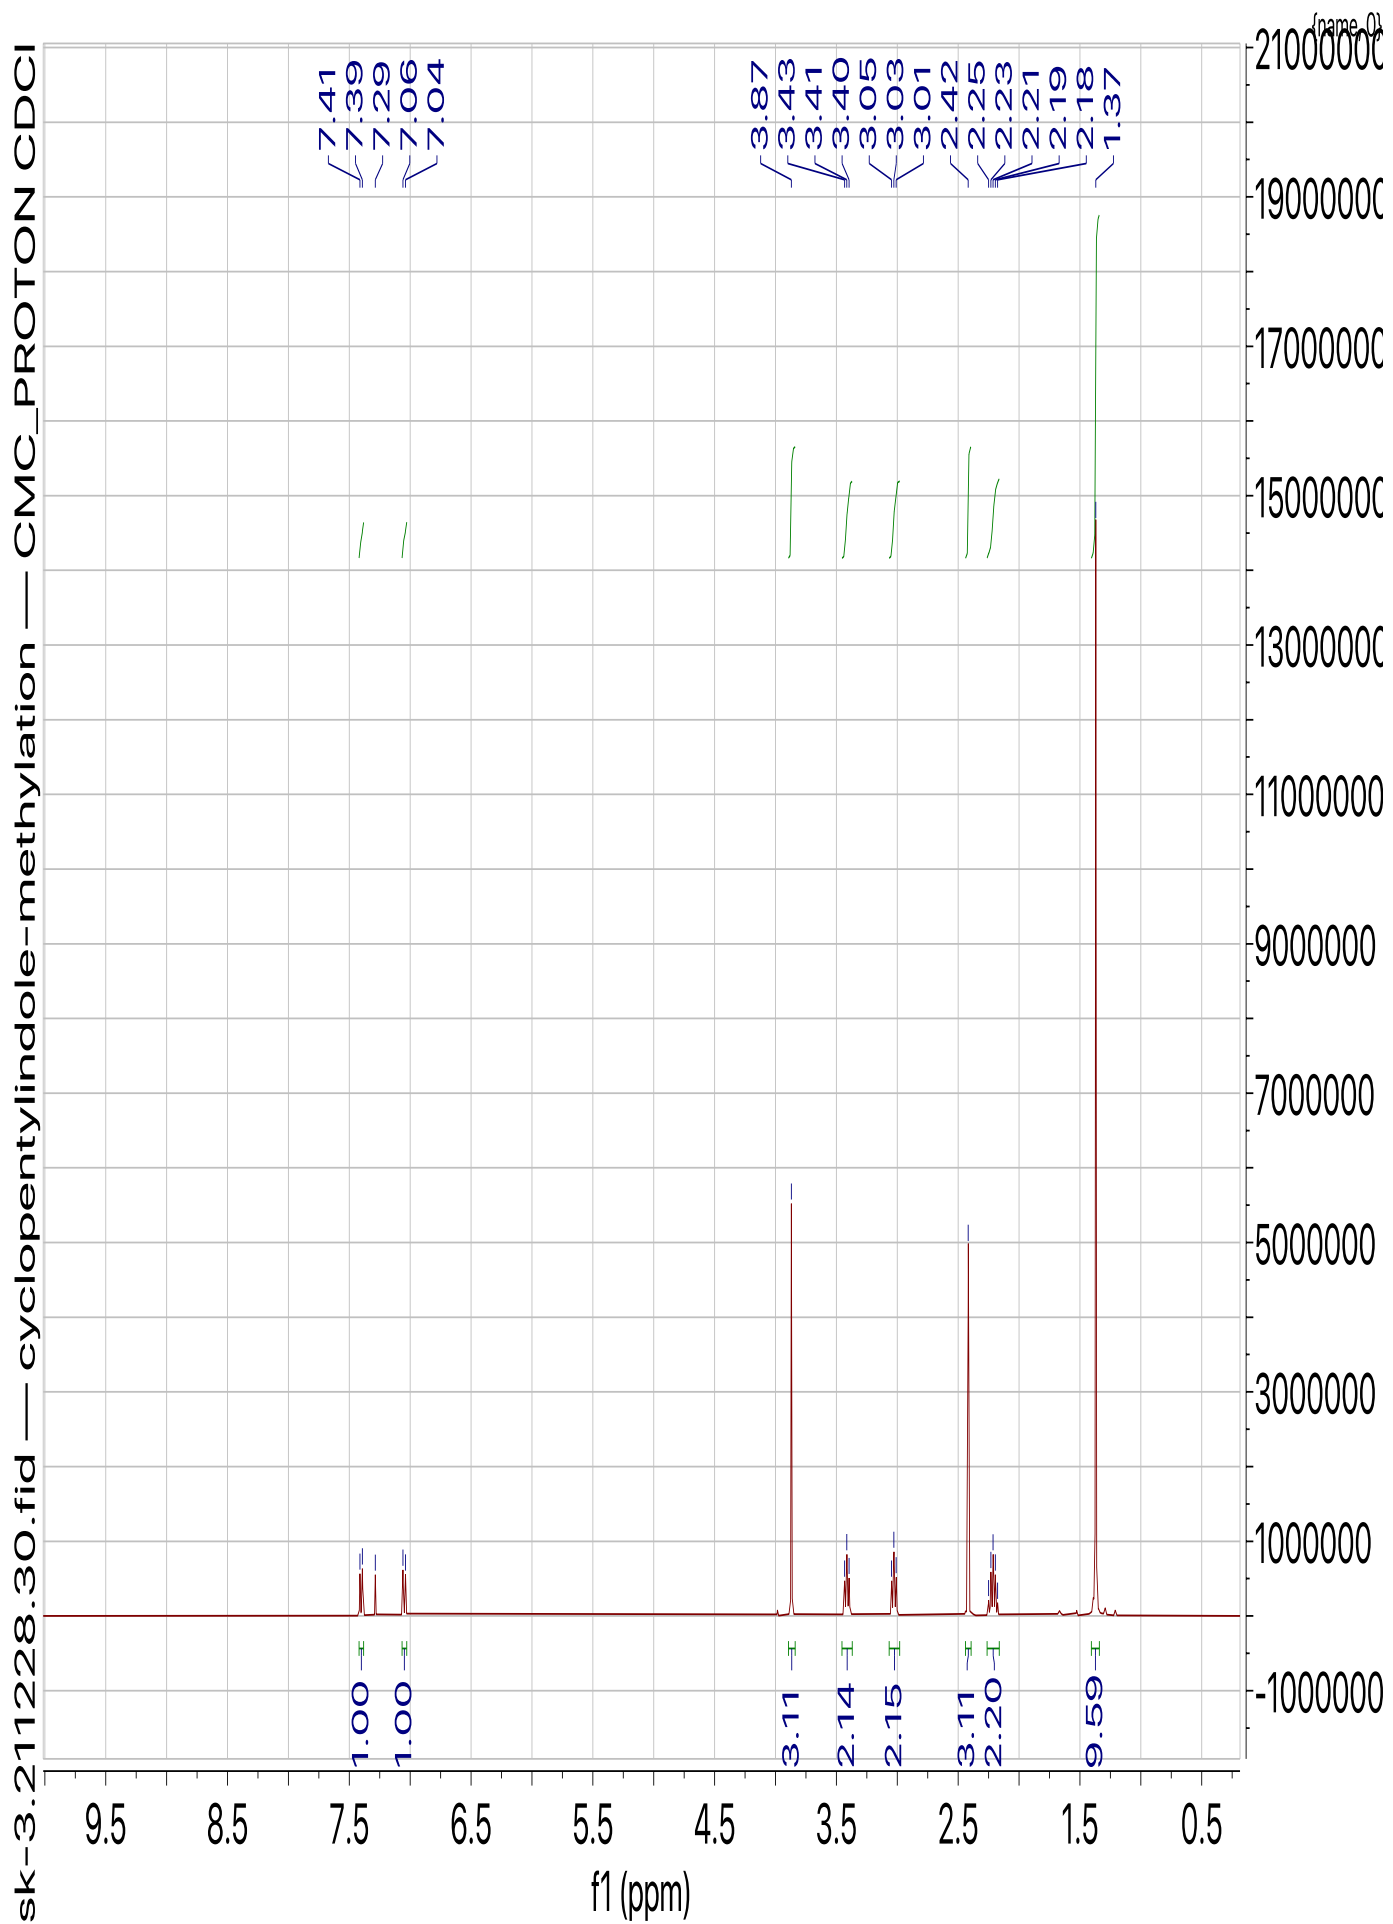

3m, <sup>13</sup>C NMR (101 MHz, CDCl<sub>3</sub>)

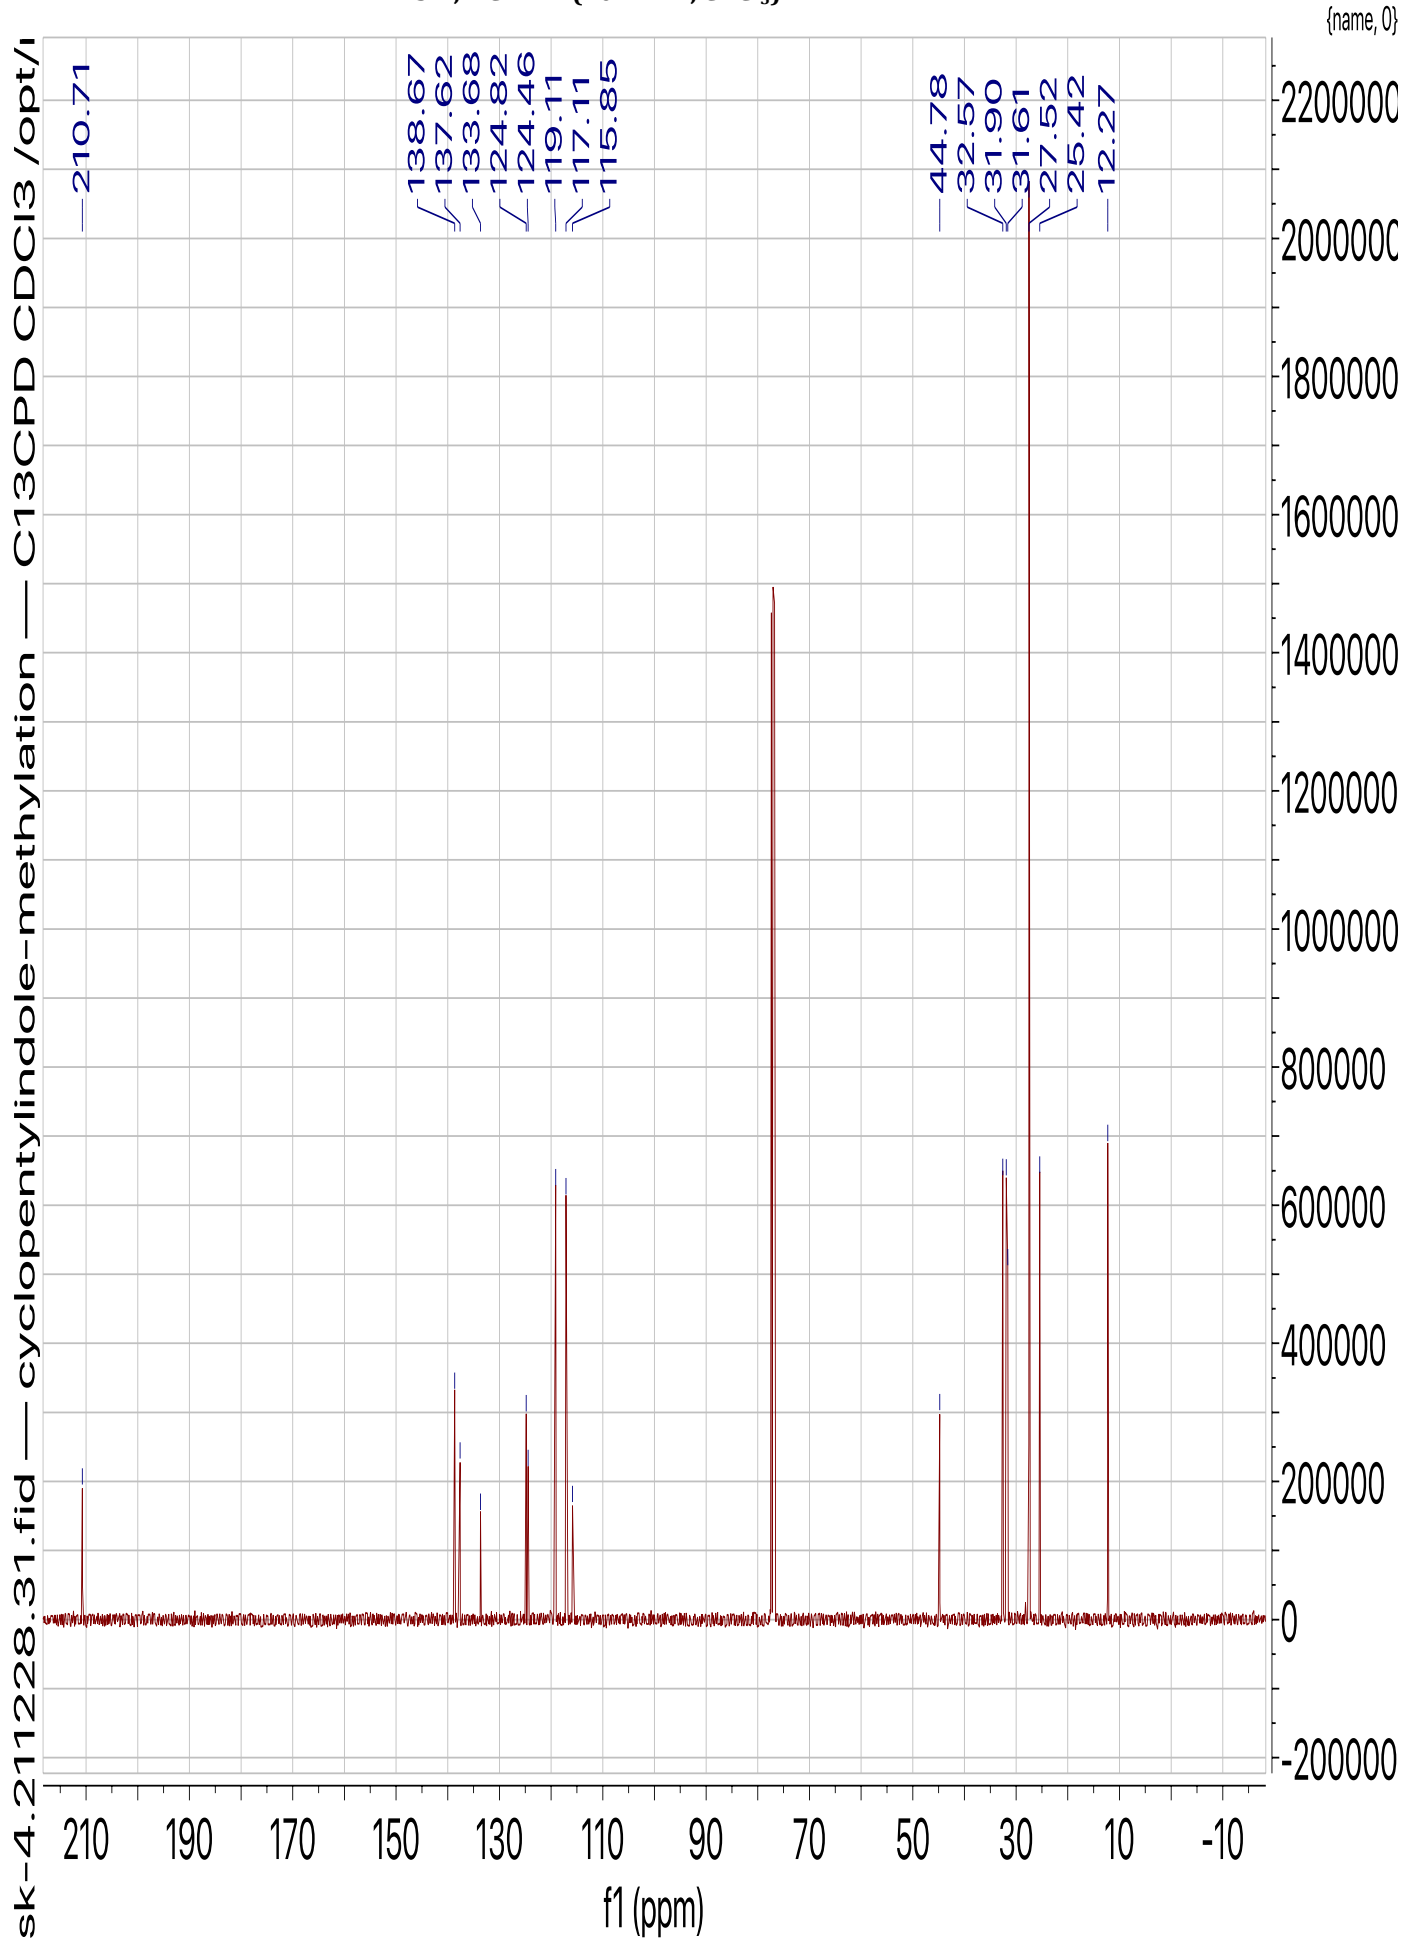

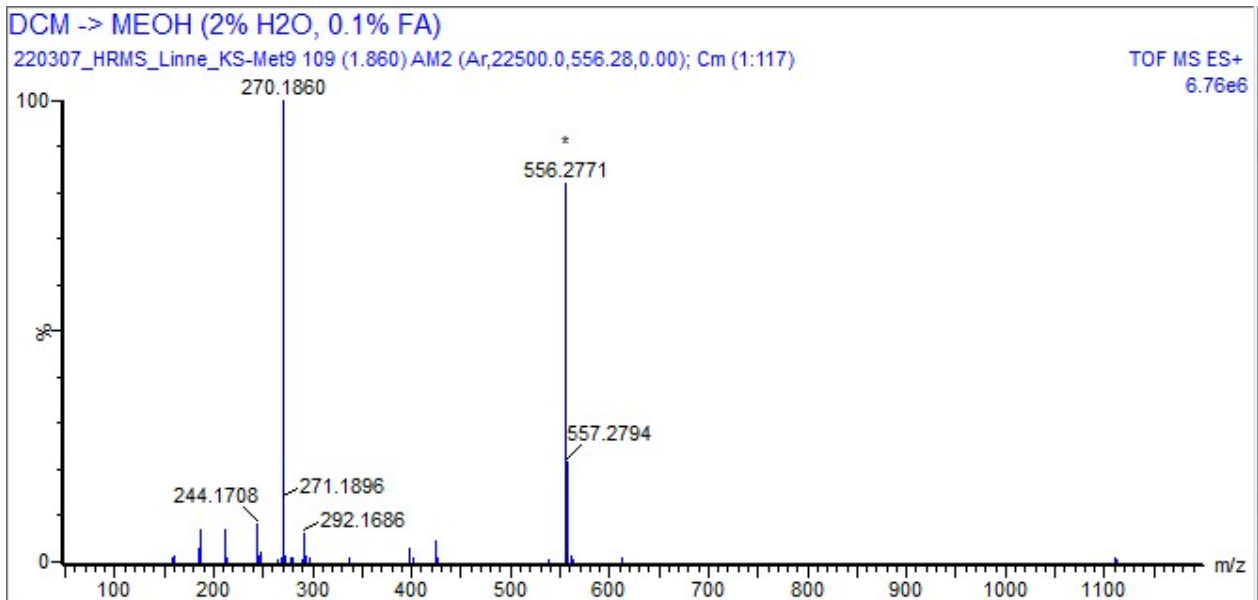

### Single Mass Analysis

Tolerance = 2.0 mDa / DBE: min = -1.5, max = 100.0

Element prediction: Off

Number of isotope peaks used for i-FIT = 2

Monoisotopic Mass, Even Electron Ions

74 formula(e) evaluated with 1 results within limits (all results (up to 1000) for each mass)

Elements Used:

C: 0-60      H: 0-100      N: 0-3      O: 0-4

| Mass     | Calc. Mass | mDa | PPM | DBE | Formula                             | i-FIT | i-FIT Norm | Fit Conf % | C  | H  | N | O |
|----------|------------|-----|-----|-----|-------------------------------------|-------|------------|------------|----|----|---|---|
| 270.1860 | 270.1858   | 0.2 | 0.7 | 7.5 | C <sub>18</sub> H <sub>24</sub> N O | 26.1  | n/a        | n/a        | 18 | 24 | 1 | 1 |

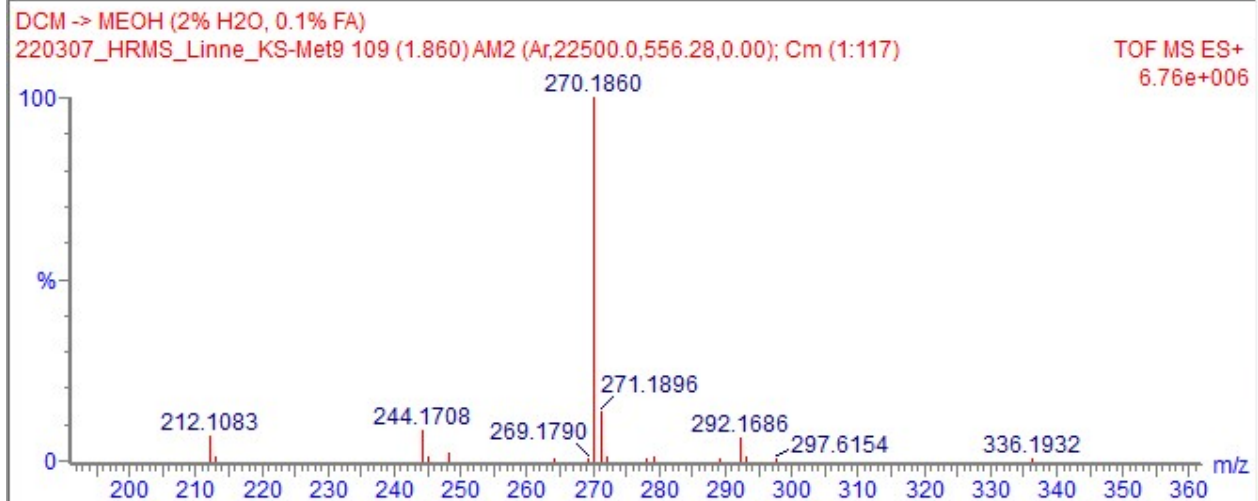

HRMS spectra of **3m**

sk-221220.40.fid — 7-Br-indole-methylation — PROTON CDCl<sub>3</sub> {D:\nmrd;

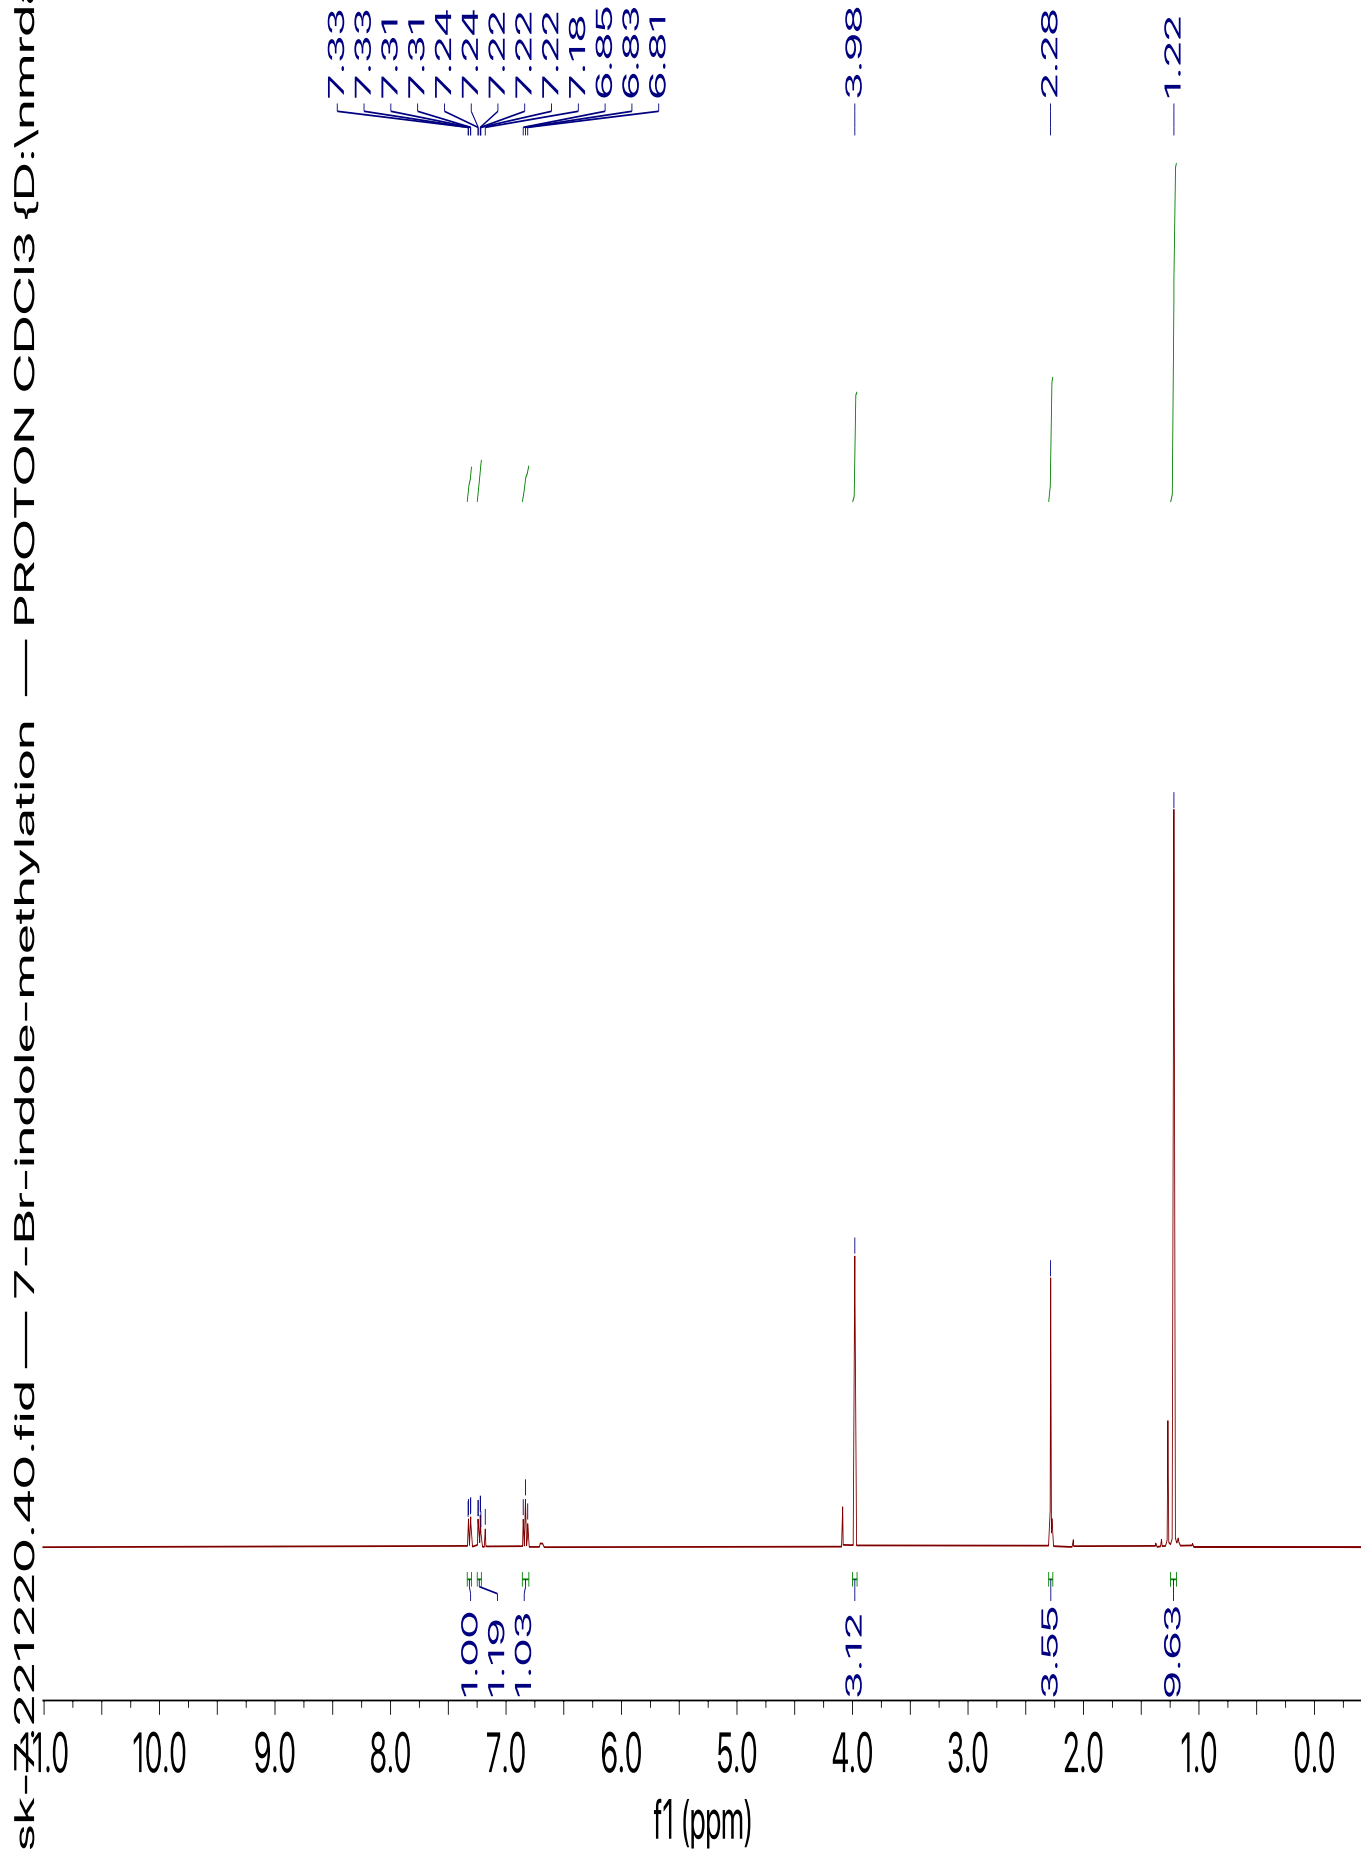



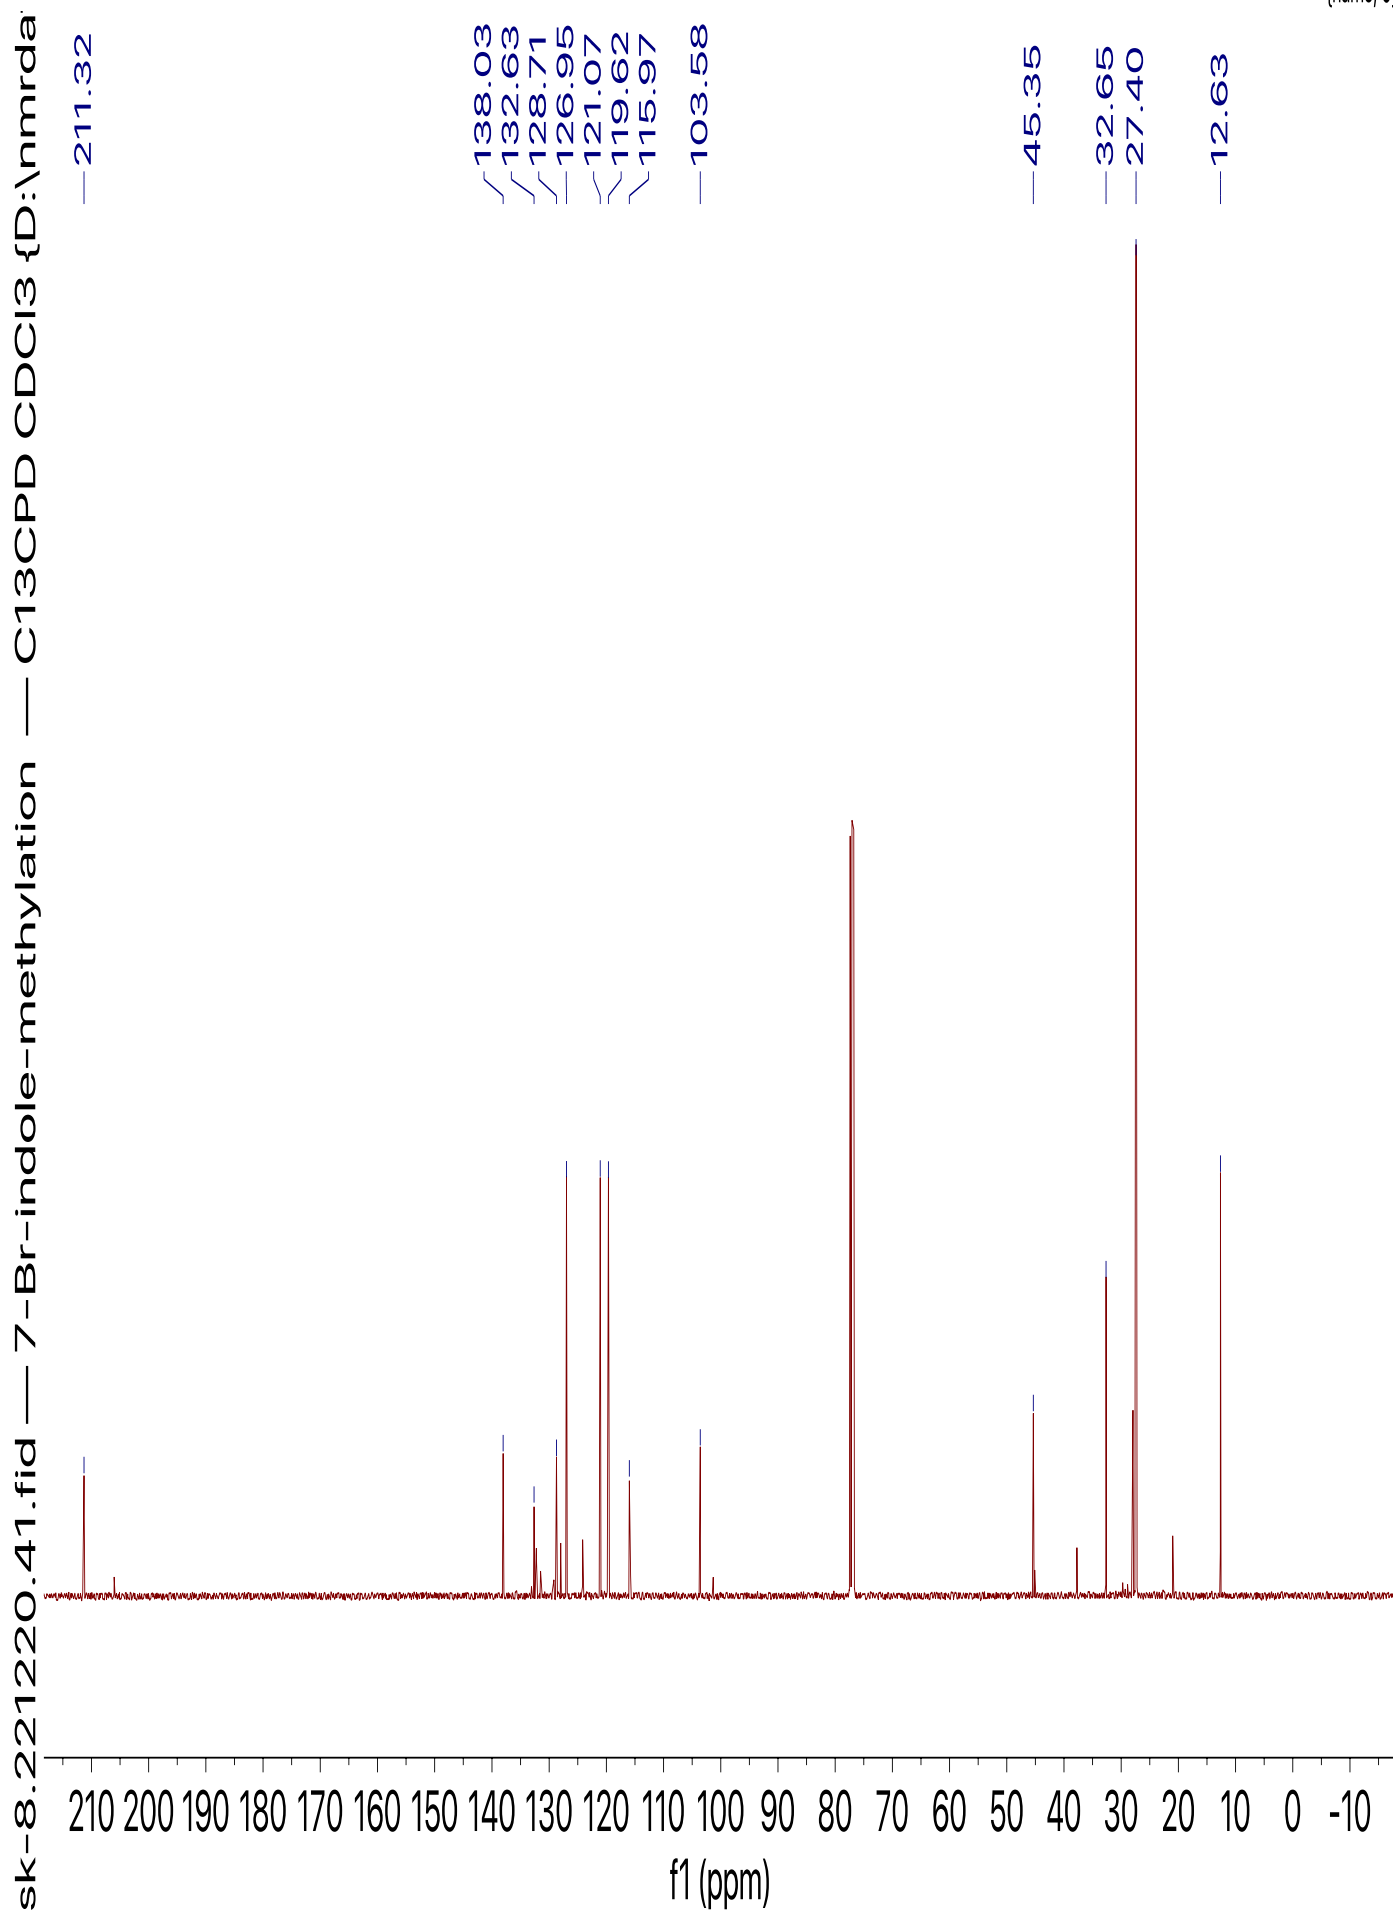

DCM -> MEOH (2% H2O, 0.1% FA)

220307\_HRMS\_Linne\_KS-Met16 101 (1.725)AM2 (Ar,22500.0,556.28,0.00); Cm (1:117)

TOF MS ES+  
8.57e6

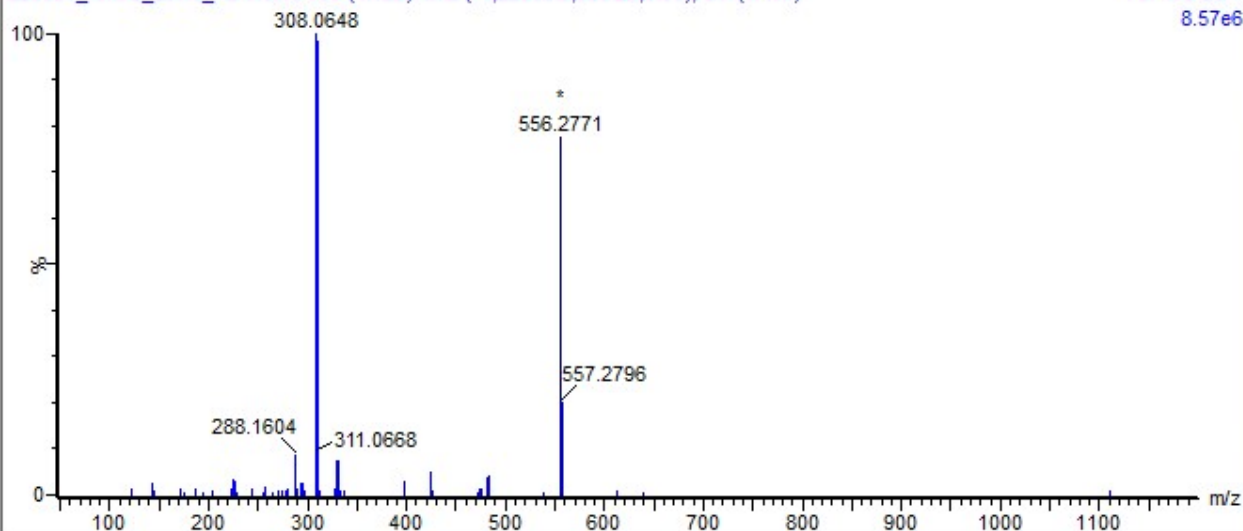

### Single Mass Analysis

Tolerance = 2.0 mDa / DBE: min = -1.5, max = 100.0

Element prediction: Off

Number of isotope peaks used for i-FIT = 2

Monoisotopic Mass, Even Electron Ions

147 formula(e) evaluated with 1 results within limits (all results (up to 1000) for each mass)

Elements Used:

C: 0-60      H: 0-100      N: 0-3      O: 0-4      Br: 0-1

| Mass     | Calc. Mass | mDa  | PPM  | DBE | Formula        | i-... | i-FIT Norm | Fit Conf % | C  | H  | N | O | Br |
|----------|------------|------|------|-----|----------------|-------|------------|------------|----|----|---|---|----|
| 308.0648 | 308.0650   | -0.2 | -0.6 | 6.5 | C15 H19 N O Br | 2...  | n/a        | n/a        | 15 | 19 | 1 | 1 | 1  |

DCM -> MEOH (2% H2O, 0.1% FA)

220307\_HRMS\_Linne\_KS-Met16 101 (1.725)AM2 (Ar,22500.0,556.28,0.00); Cm (1:117)

TOF MS ES+  
8.57e+006

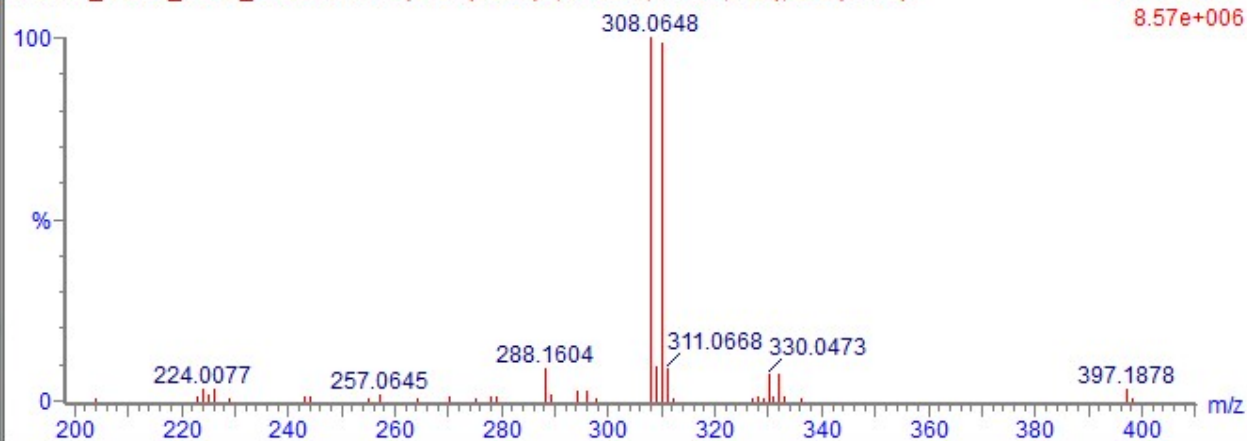

HRMS spectra of 3n

30, <sup>1</sup>H NMR (400 MHz, CDCl<sub>3</sub>)

{name, 0}

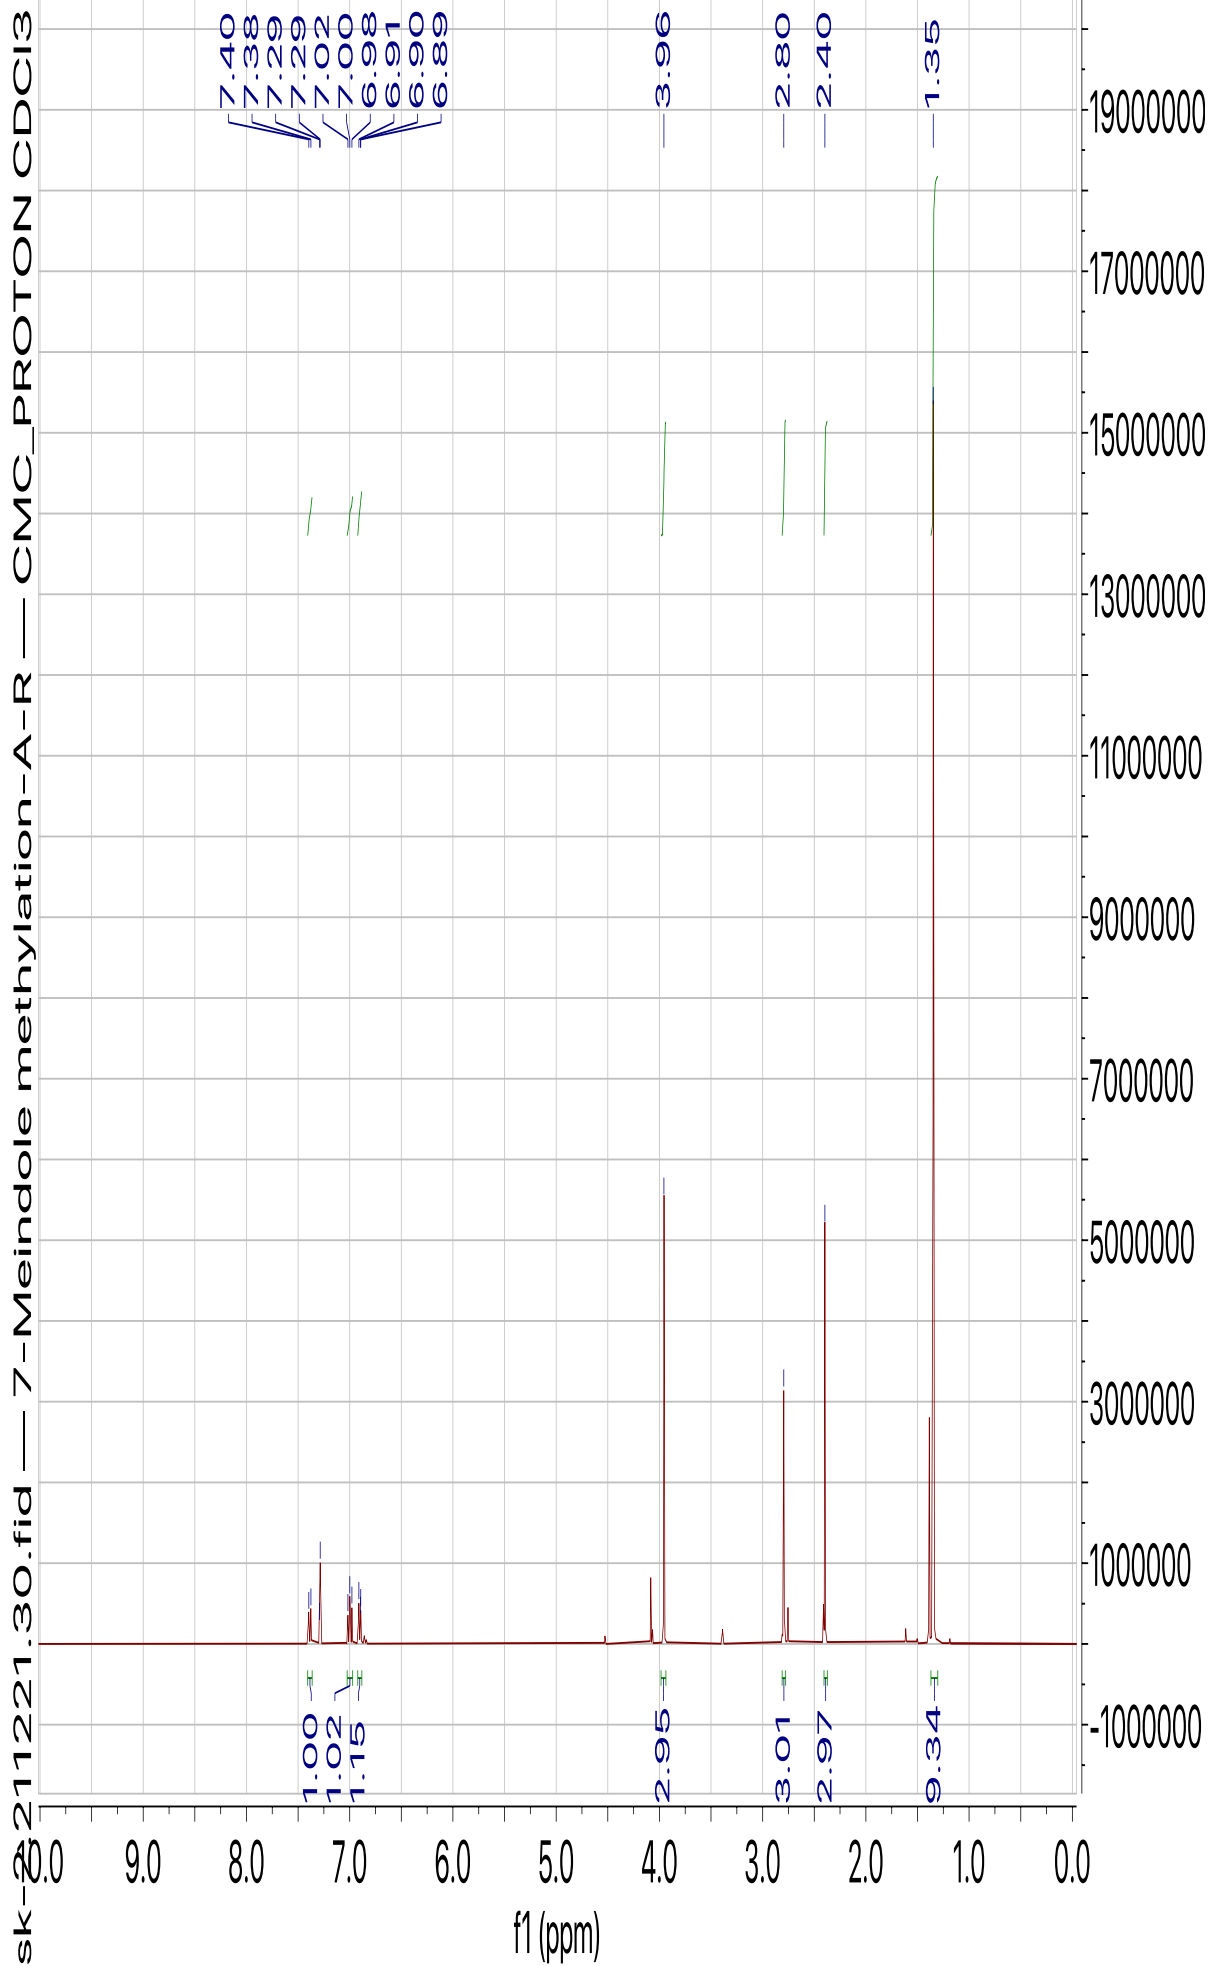

30, <sup>13</sup>C NMR (101 MHz, CDCl<sub>3</sub>)

{name, 0}

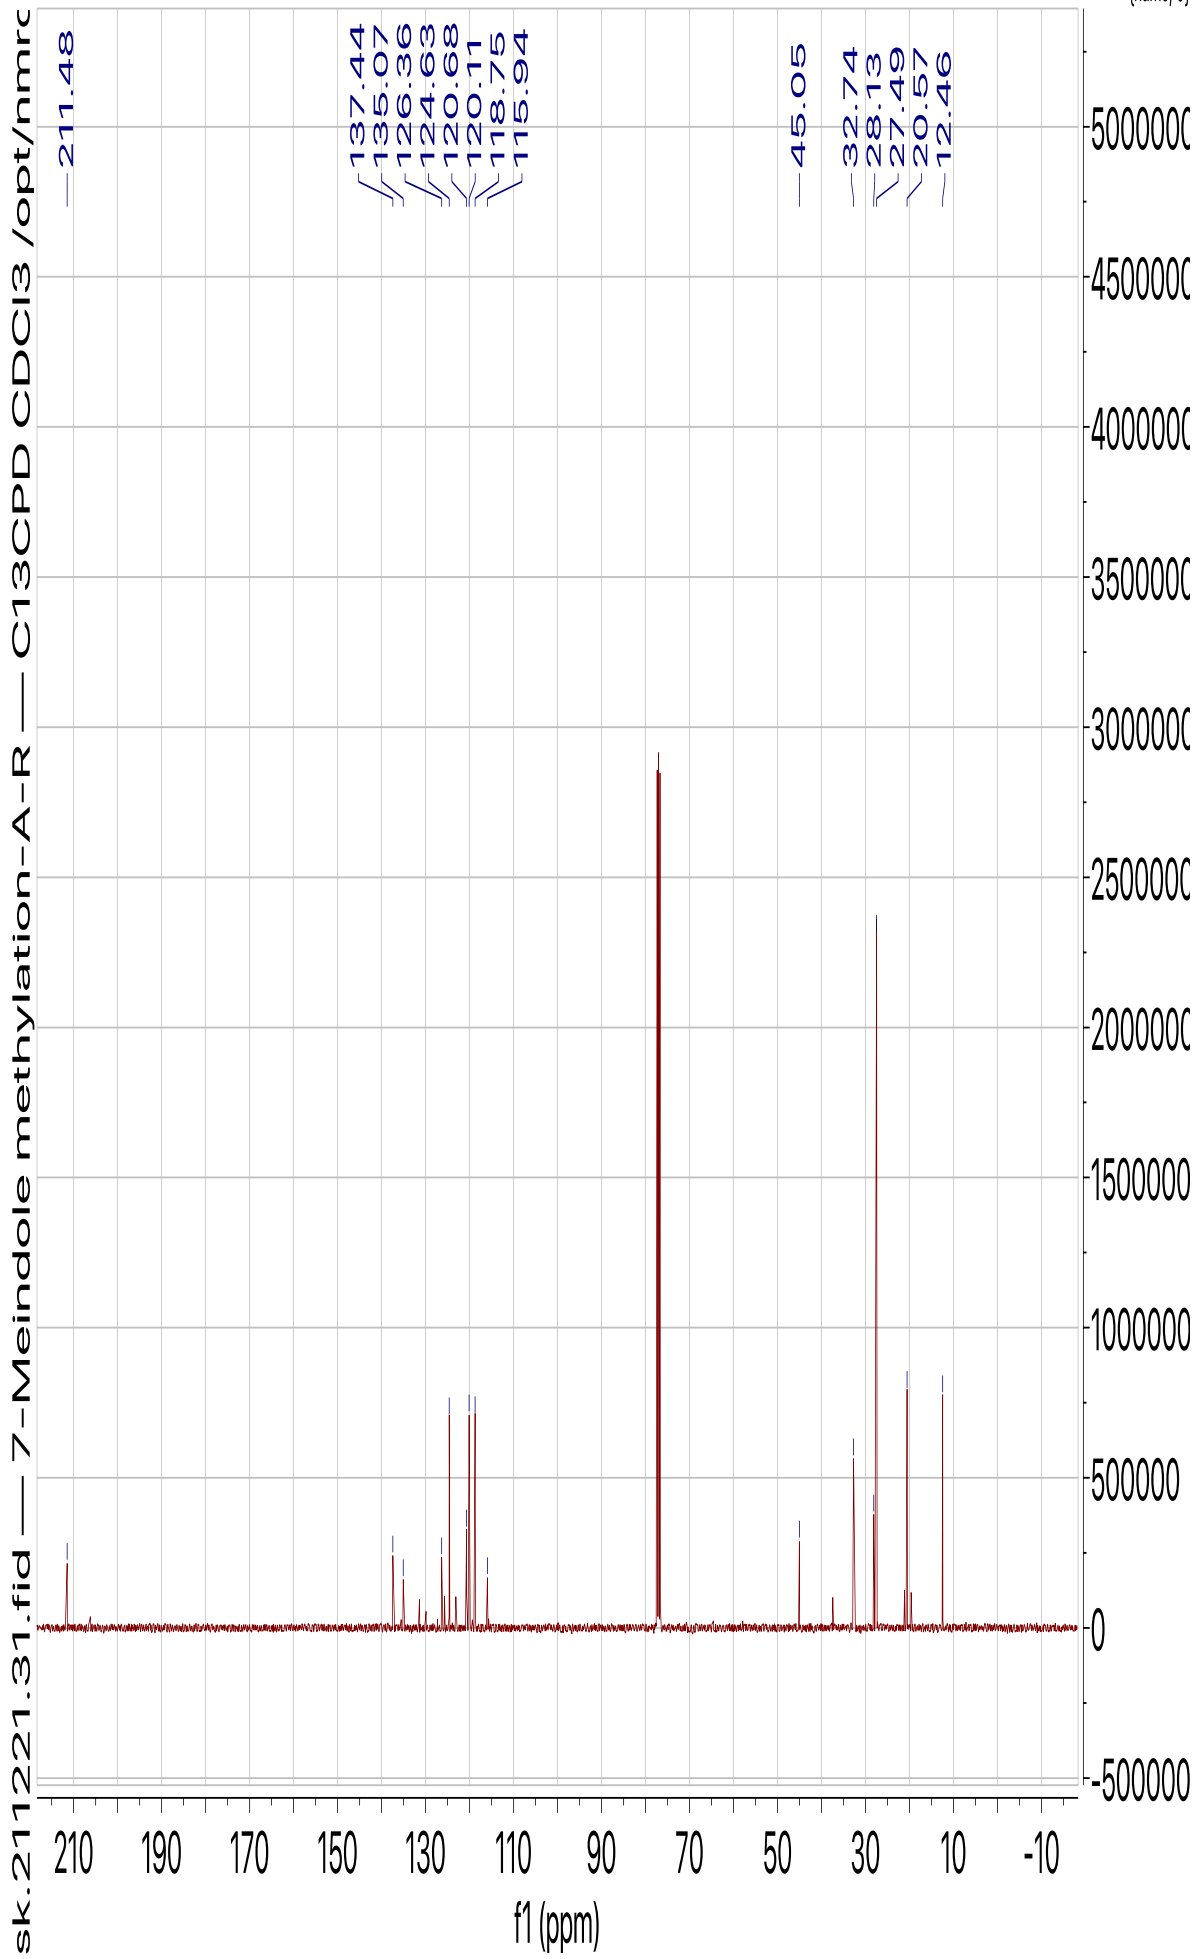

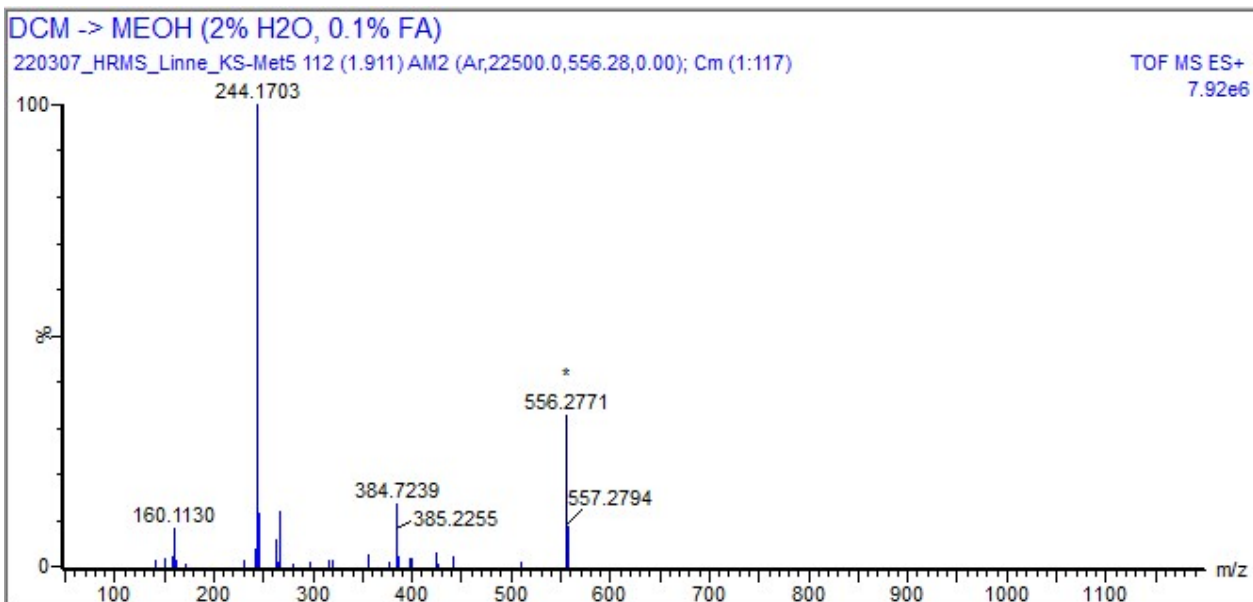

### Single Mass Analysis

Tolerance = 2.0 mDa / DBE: min = -1.5, max = 100.0

Element prediction: Off

Number of isotope peaks used for i-FIT = 2

Monoisotopic Mass, Even Electron Ions

66 formula(e) evaluated with 1 results within limits (all results (up to 1000) for each mass)

Elements Used:

C: 0-60      H: 0-100      N: 0-3      O: 0-4

| Mass     | Calc. Mass | mDa | PPM | DBE | Formula     | i-FIT | i-FIT Norm | Fit Conf % | C  | H  | N | O |
|----------|------------|-----|-----|-----|-------------|-------|------------|------------|----|----|---|---|
| 244.1703 | 244.1701   | 0.2 | 0.8 | 6.5 | C16 H22 N O | 26.3  | n/a        | n/a        | 16 | 22 | 1 | 1 |

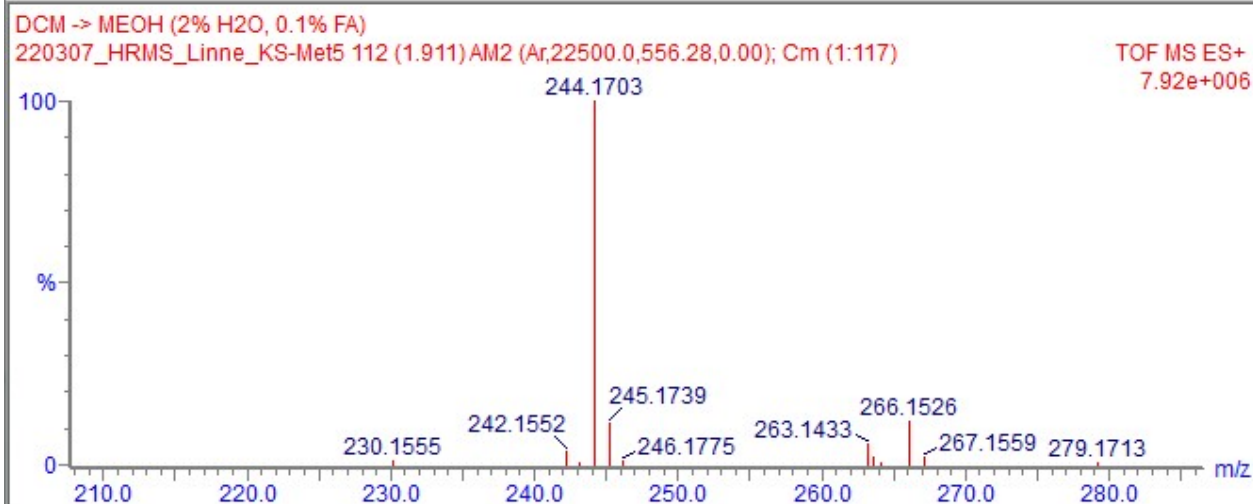

HRMS spectra of **3o**

3p, <sup>1</sup>H NMR, CDCl<sub>3</sub>, 400 MHz

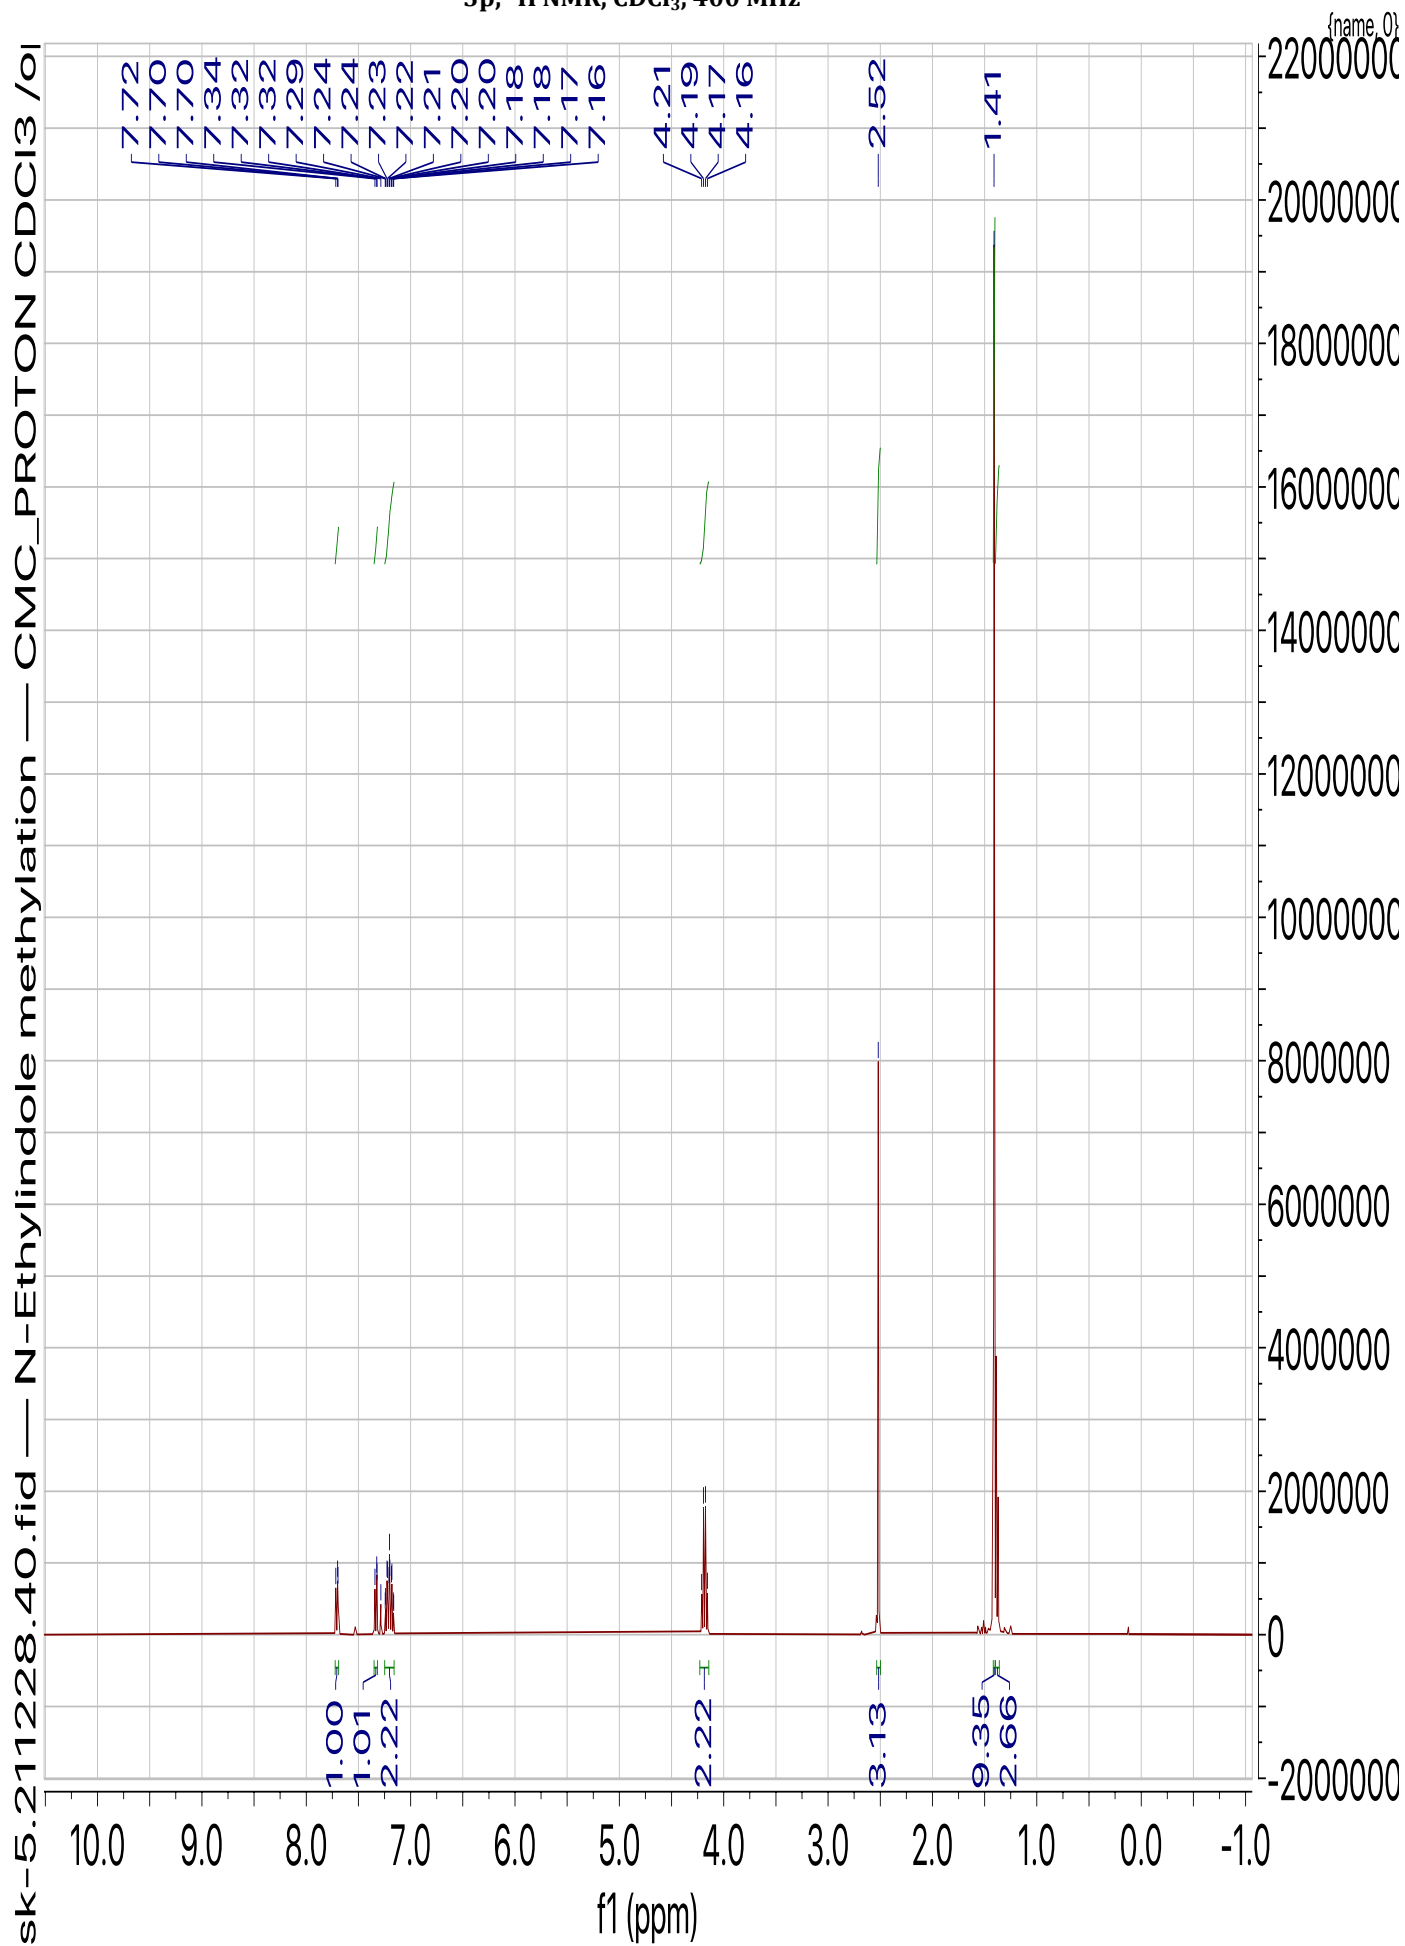

3p, <sup>13</sup>C NMR (101 MHz, CDCl<sub>3</sub>)

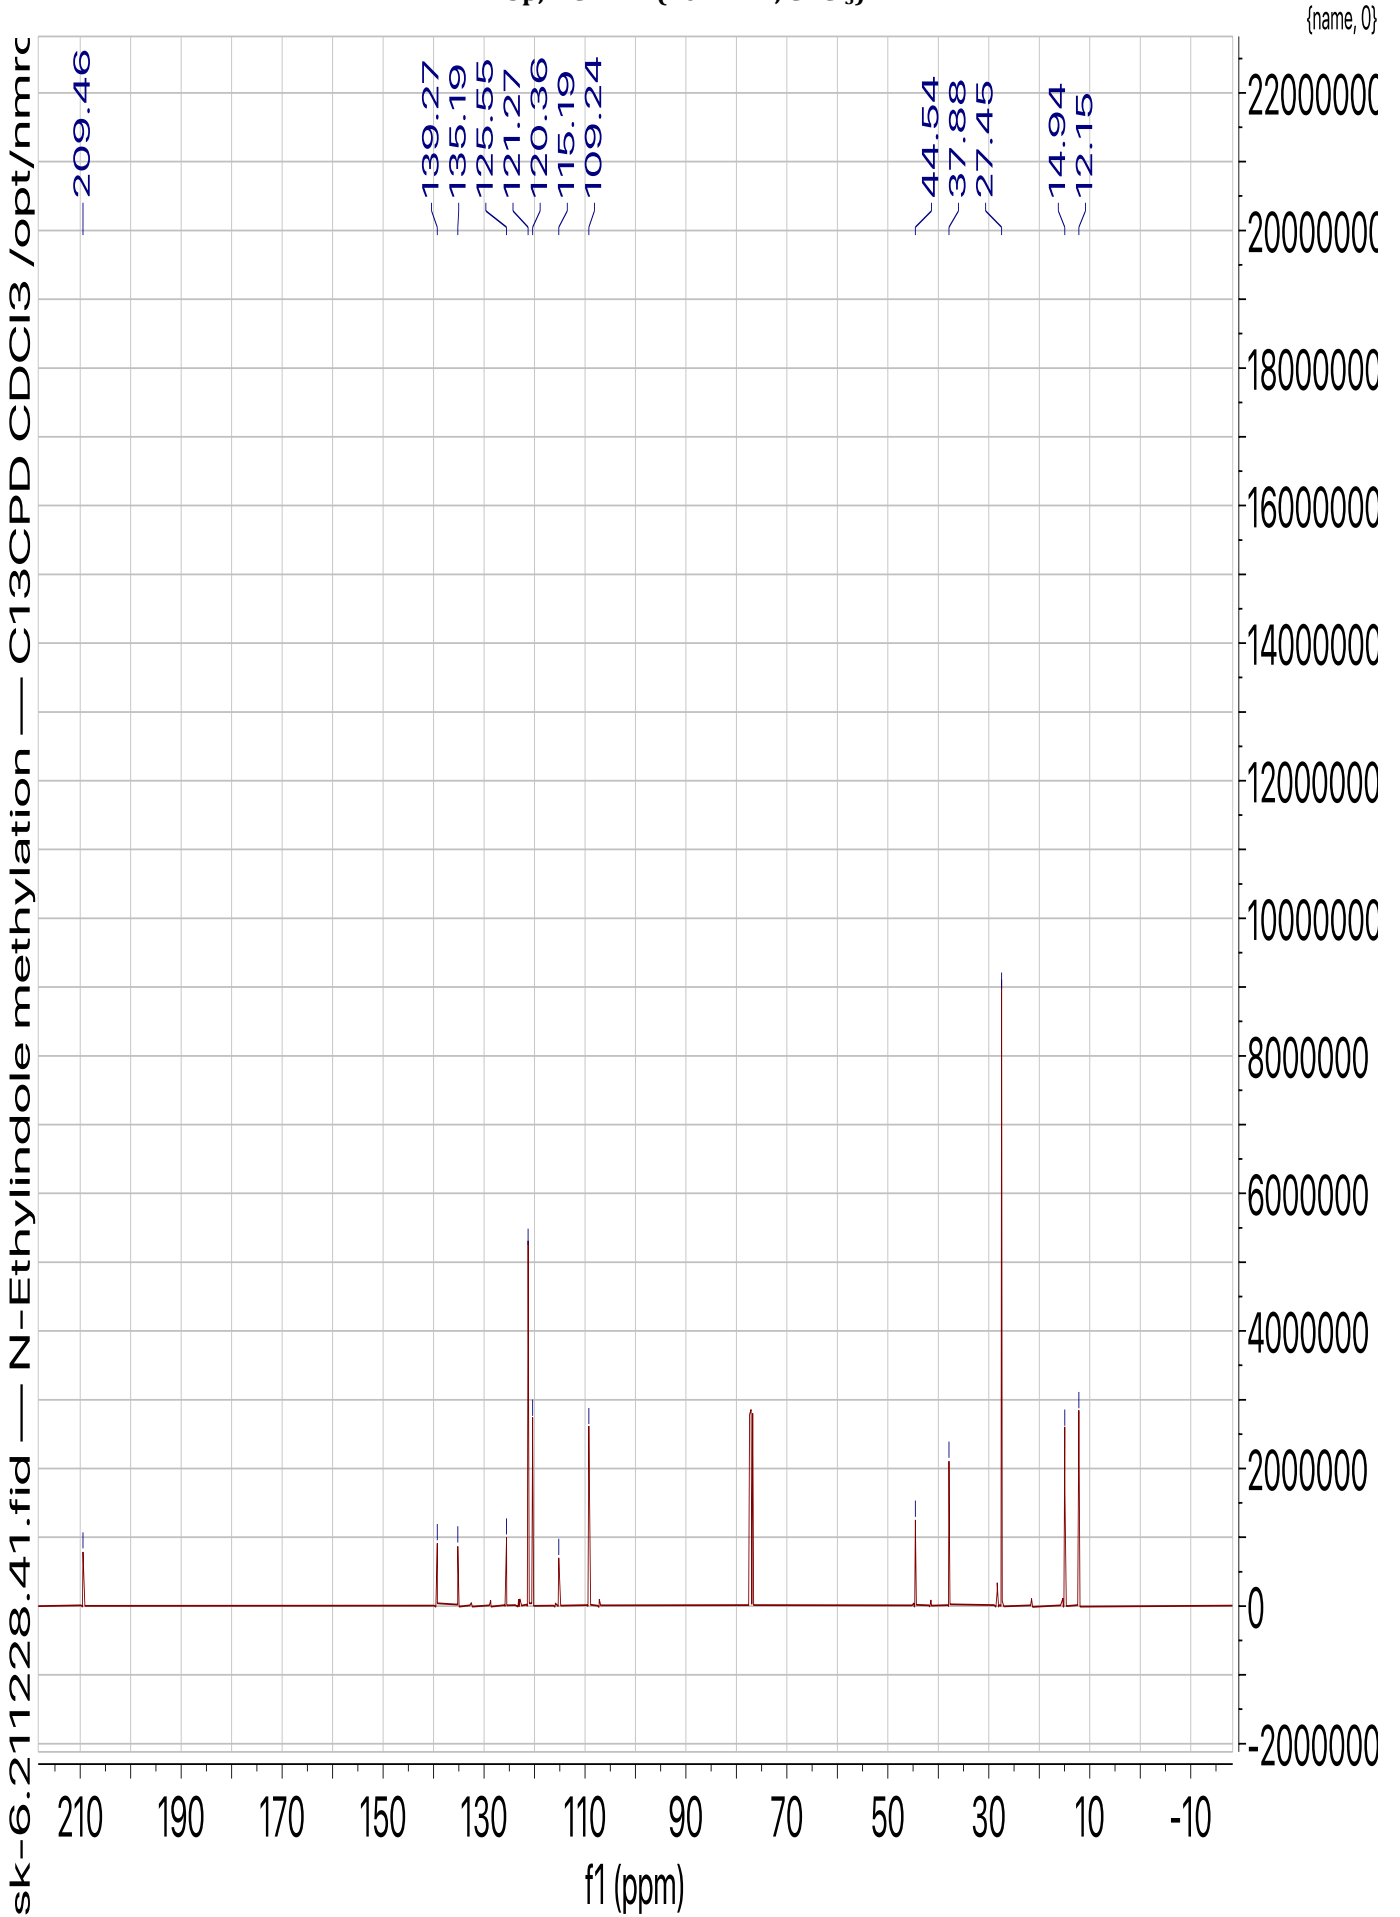

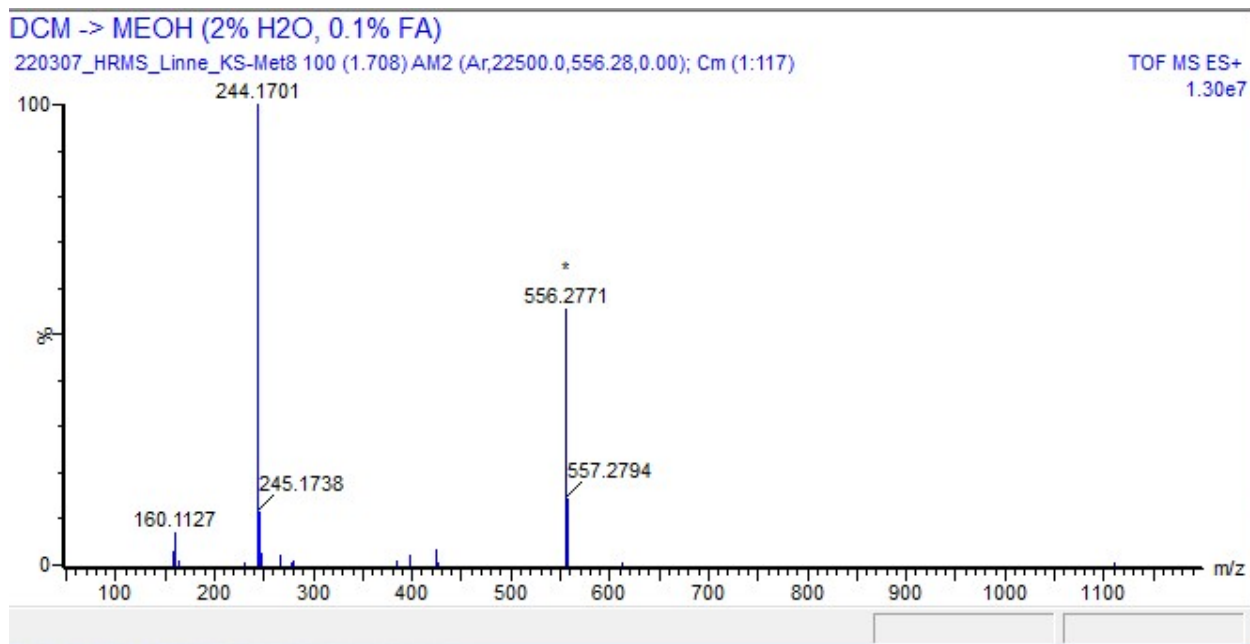

### Single Mass Analysis

Tolerance = 2.0 mDa / DBE: min = -1.5, max = 100.0

Element prediction: Off

Number of isotope peaks used for i-FIT = 2

Monoisotopic Mass, Even Electron Ions

66 formula(e) evaluated with 1 results within limits (all results (up to 1000) for each mass)

Elements Used:

C: 0-60      H: 0-100      N: 0-3      O: 0-4

| Mass     | Calc. Mass | mDa | PPM | DBE | Formula     | i-FIT | i-FIT Nor... | Fit Conf % | C  | H  | N | O |
|----------|------------|-----|-----|-----|-------------|-------|--------------|------------|----|----|---|---|
| 244.1701 | 244.1701   | 0.0 | 0.0 | 6.5 | C16 H22 N O | 50.8  | n/a          | n/a        | 16 | 22 | 1 | 1 |

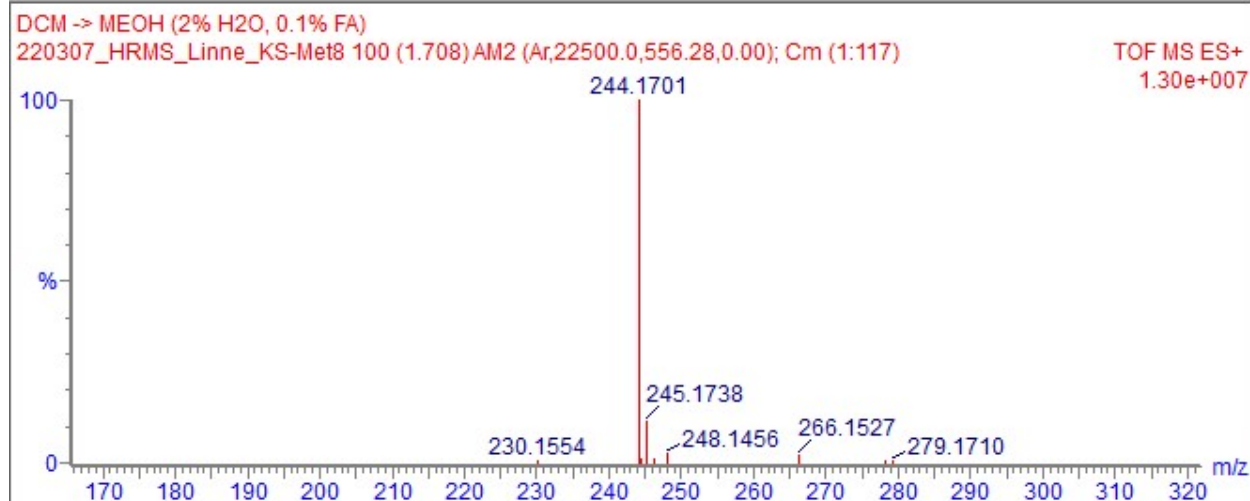

HRMS spectra of **3p**



3q, <sup>1</sup>H NMR, CDCl<sub>3</sub>, 400 MHz

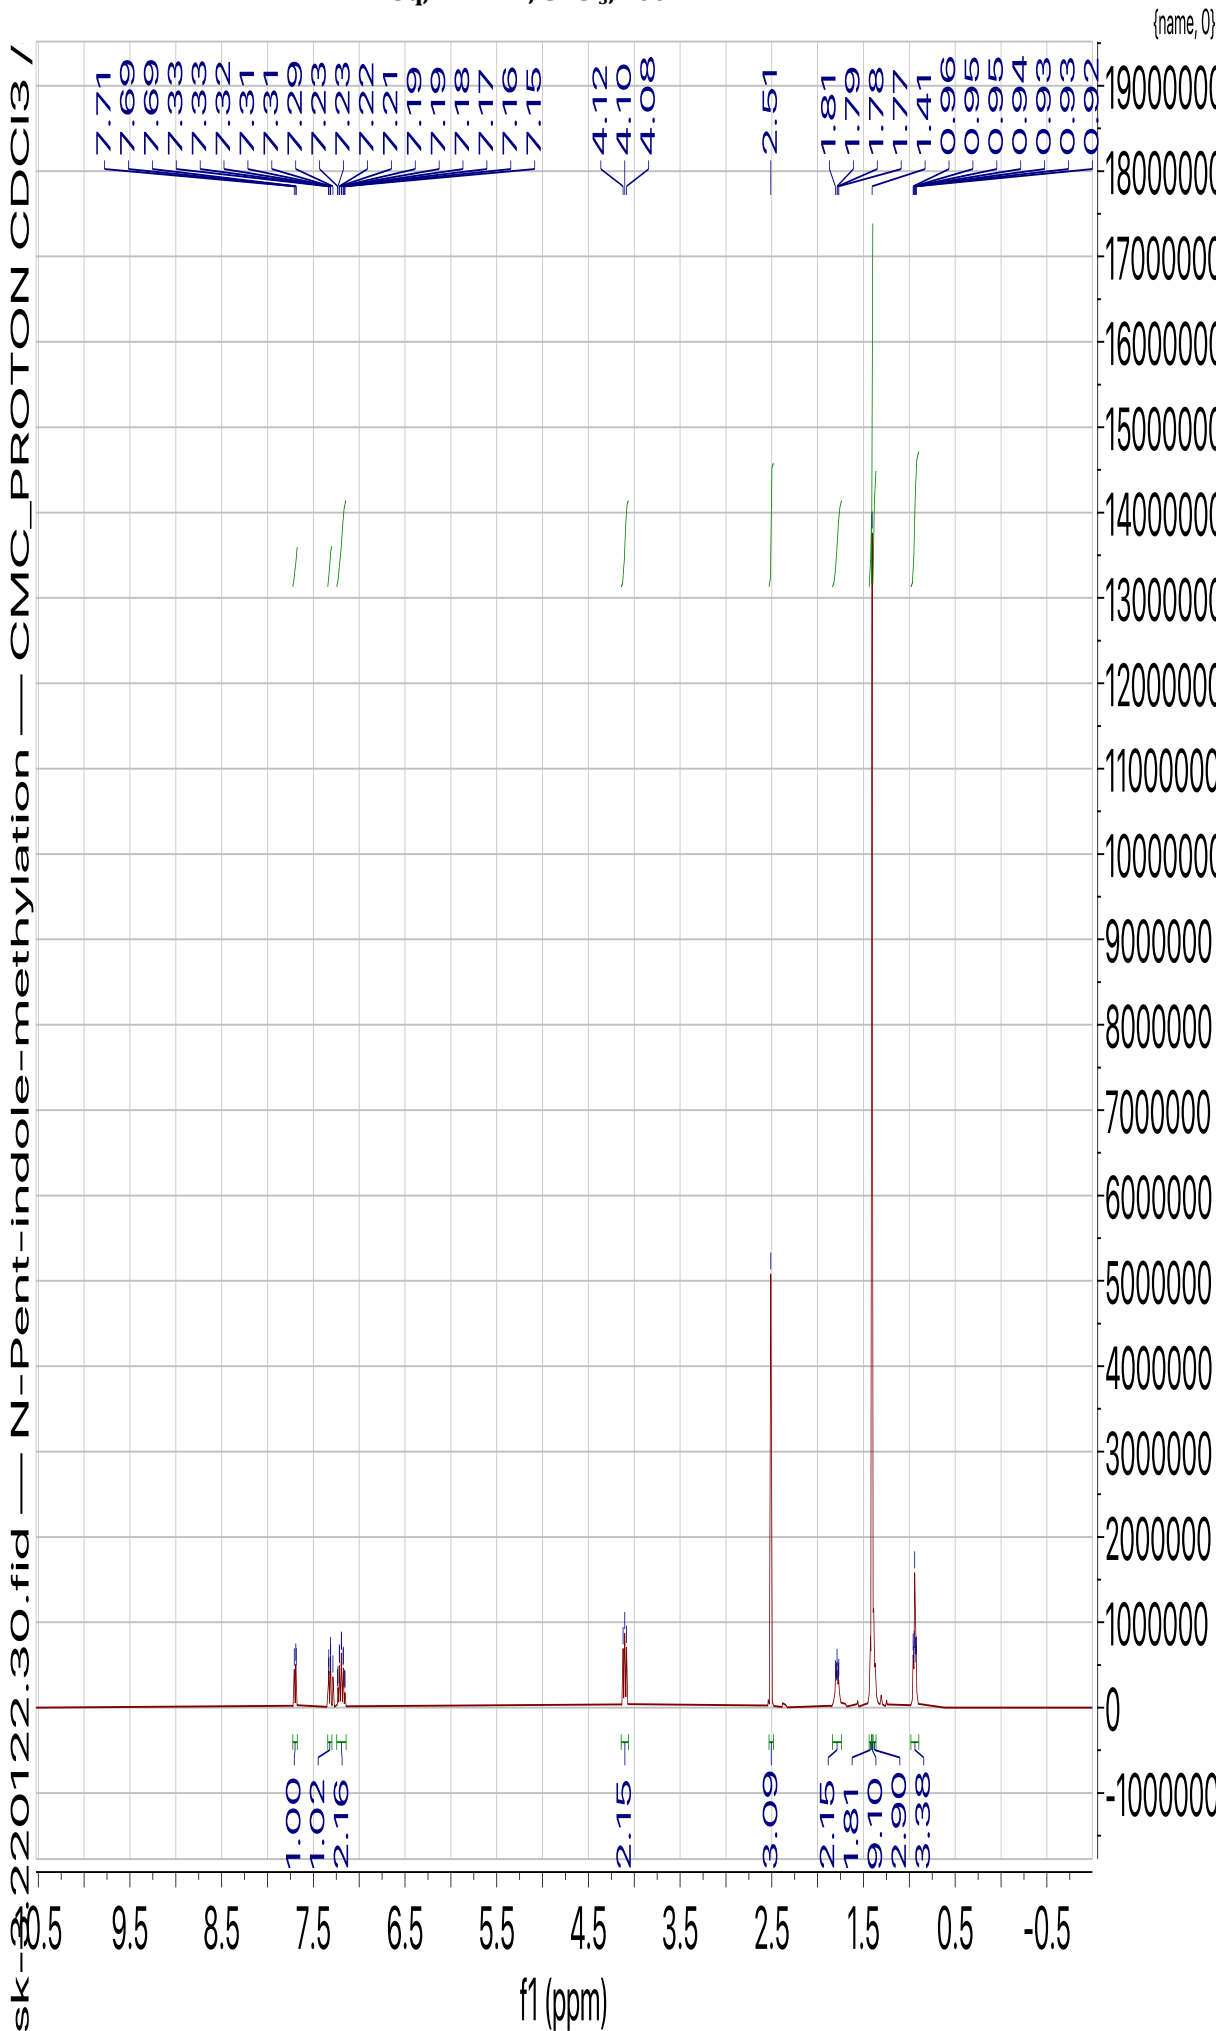

3q, <sup>13</sup>C NMR (101 MHz, CDCl<sub>3</sub>)

{name, 0}

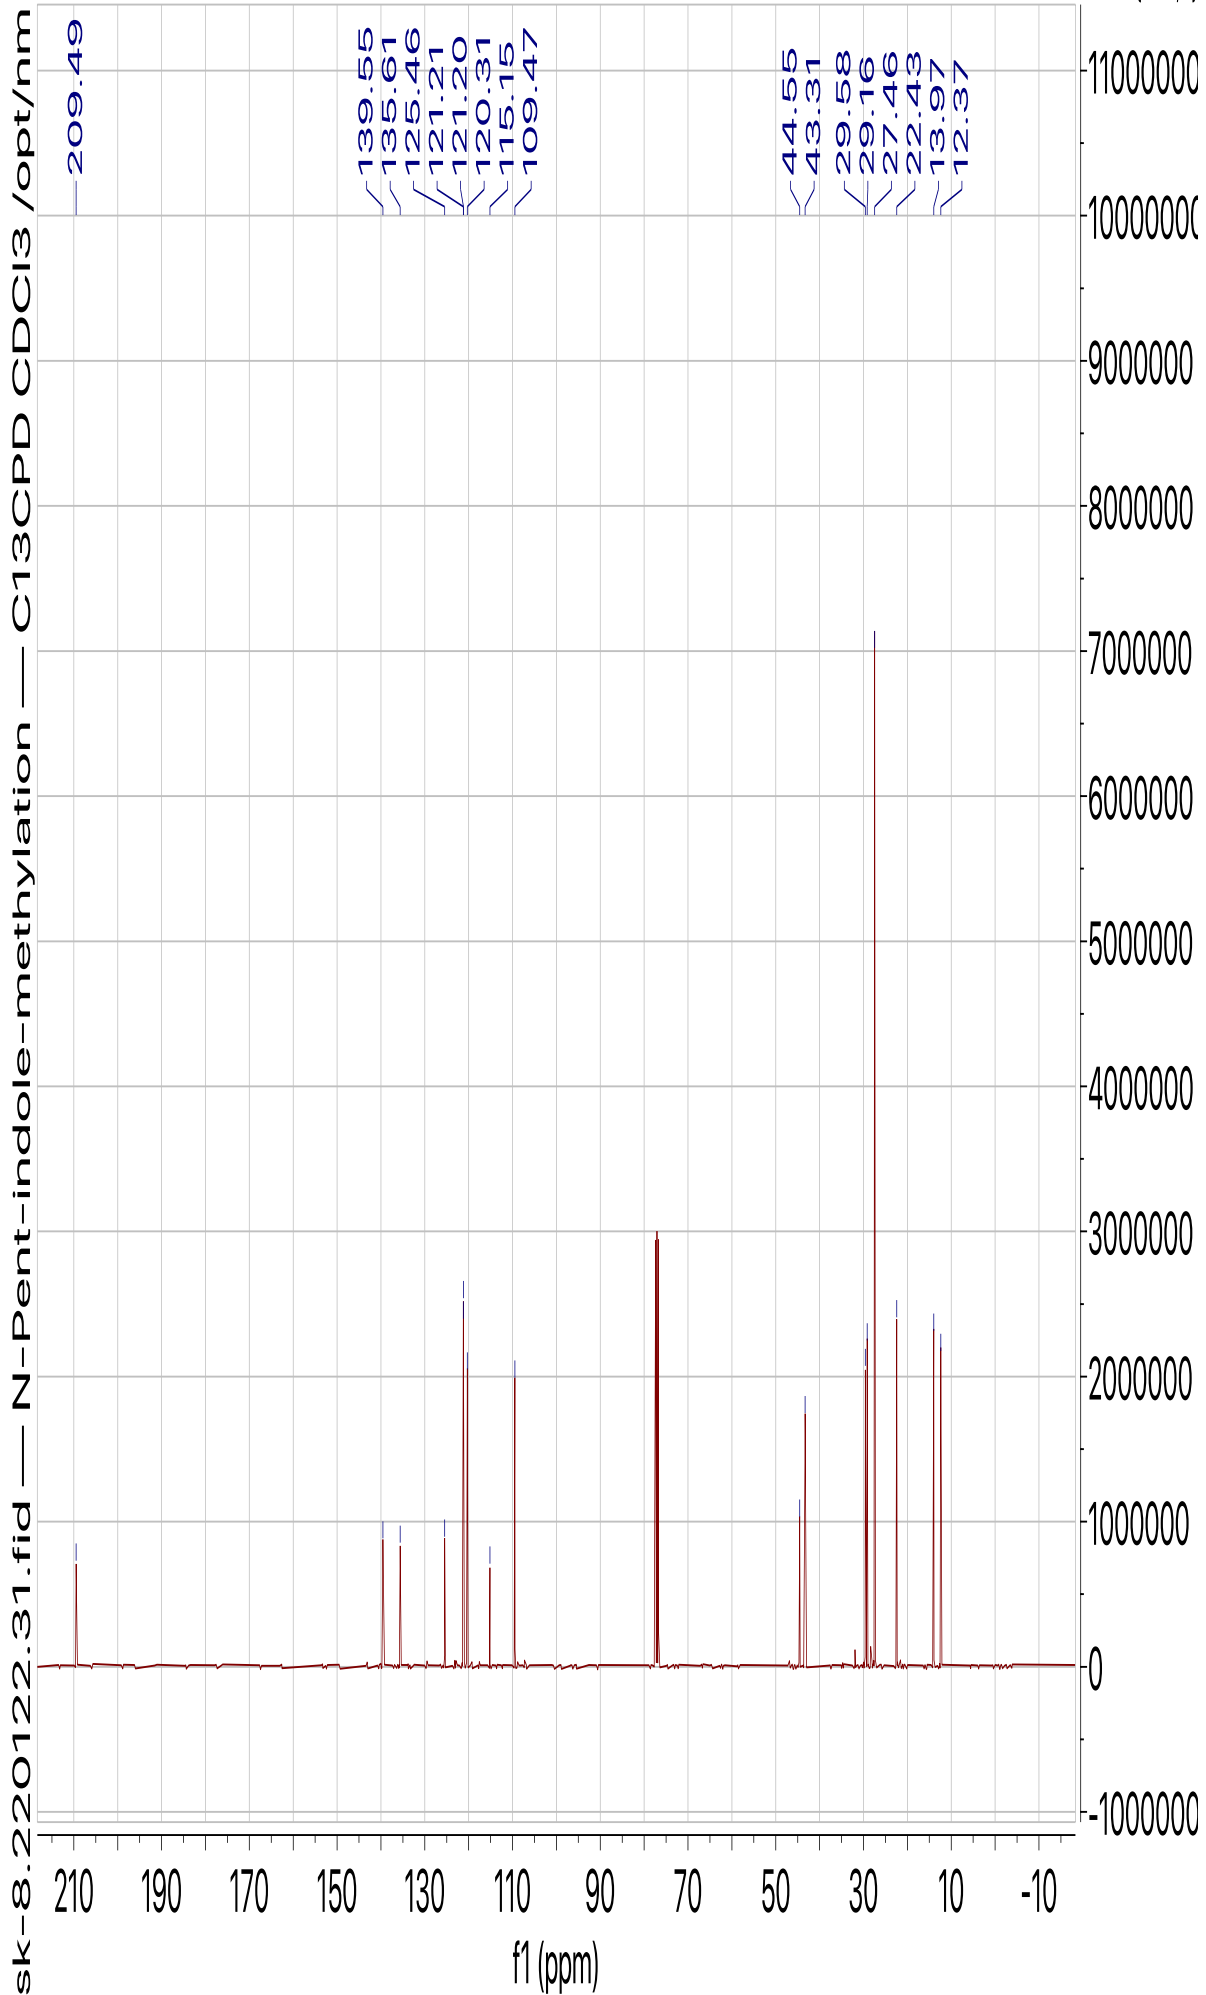

3q, DPET-135, CDCl<sub>3</sub>

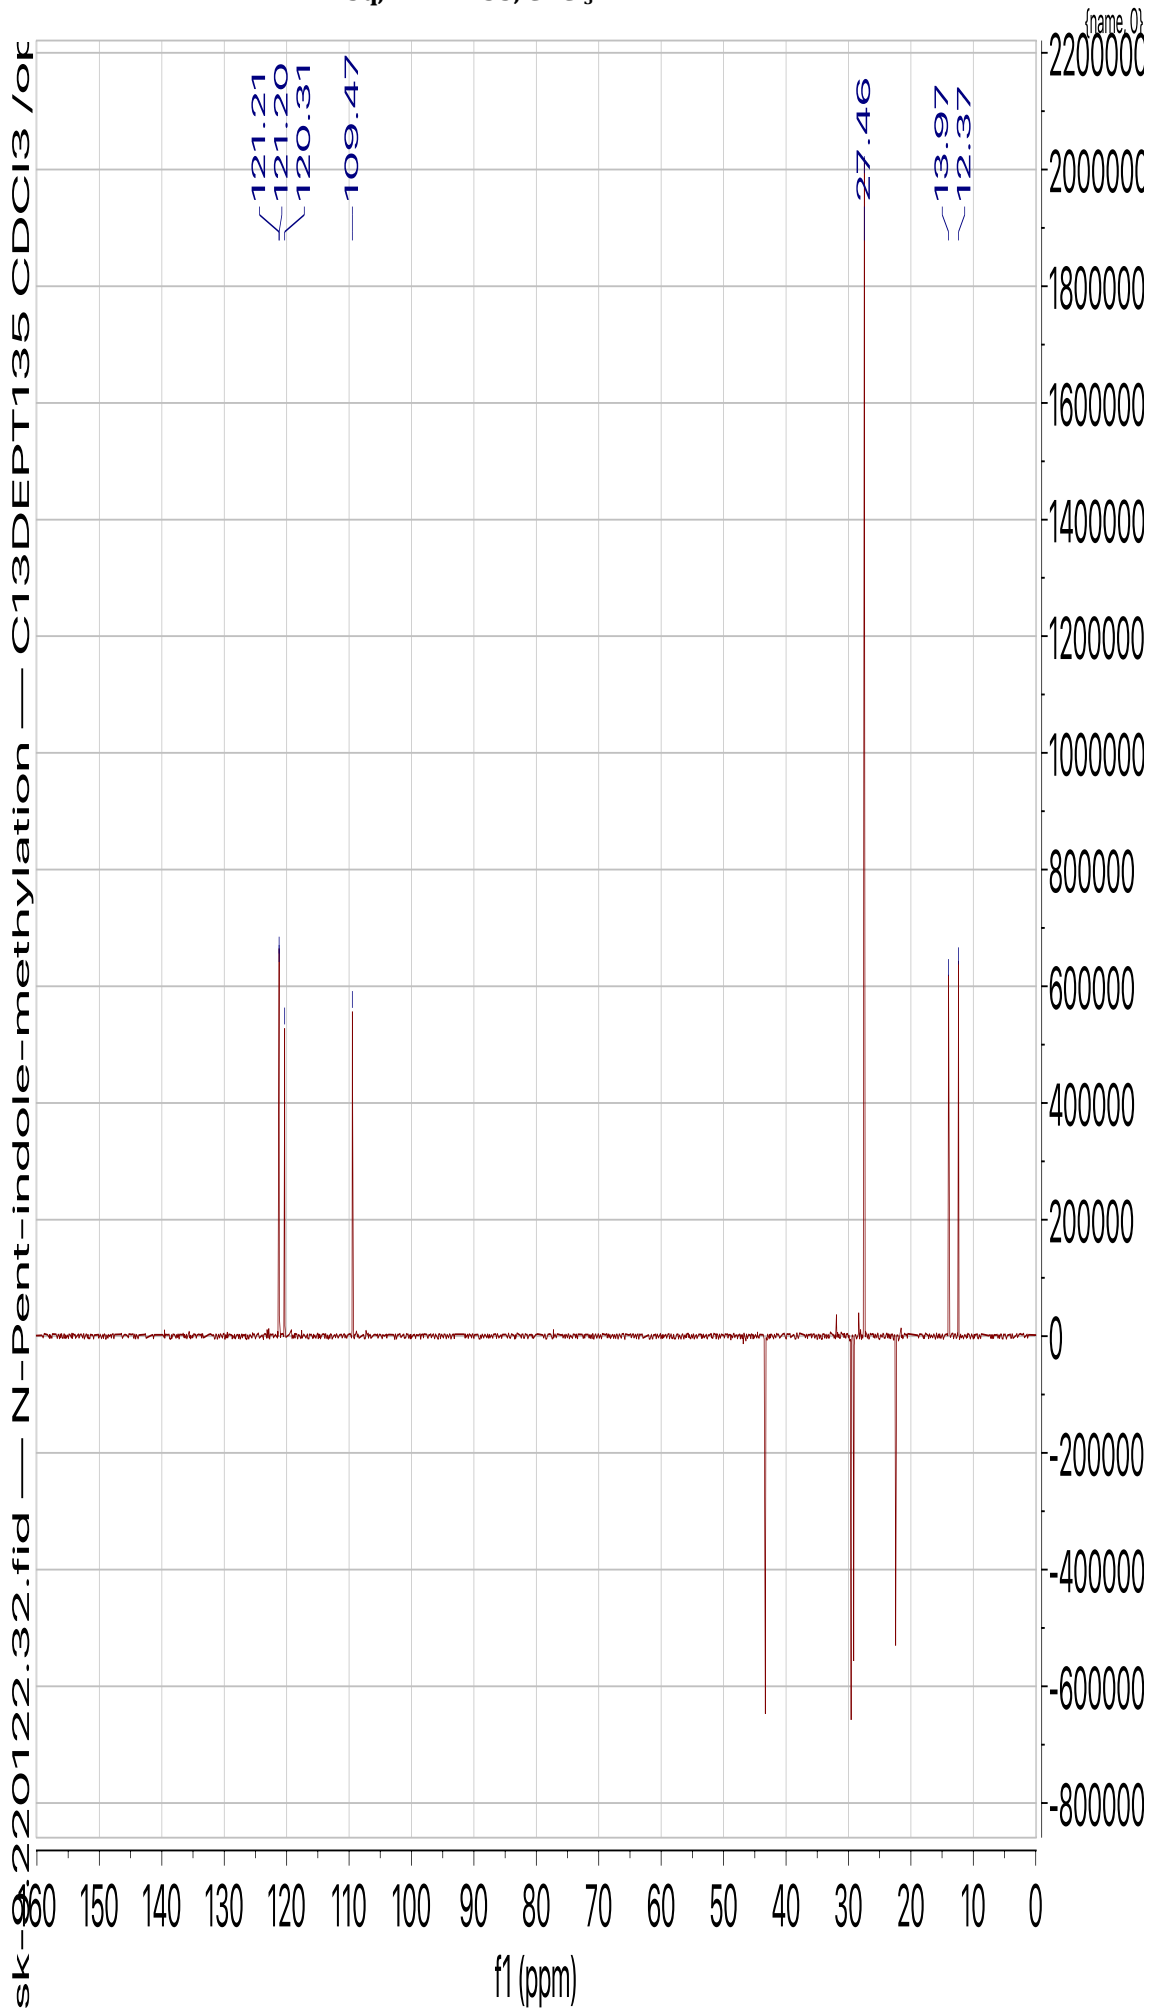

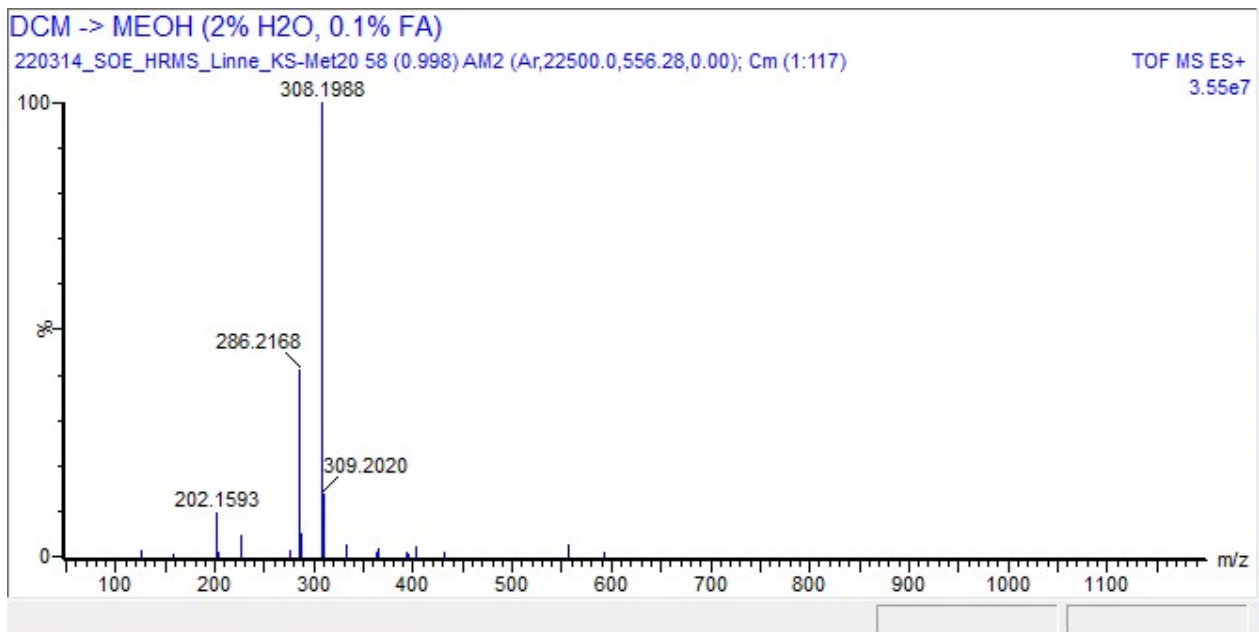

### Single Mass Analysis

Tolerance = 3.0 mDa / DBE: min = -1.5, max = 100.0

Element prediction: Off

Number of isotope peaks used for i-FIT = 2

Monoisotopic Mass, Even Electron Ions

95 formula(e) evaluated with 1 results within limits (all results (up to 1000) for each mass)

Elements Used:

C: 0-60      H: 0-100      N: 0-1      O: 0-20

| Mass     | Calc. Mass | mDa  | PPM  | DBE | Formula                                          | i-FIT | i-FIT Norm | Fit Conf % | C  | H  | N | O |
|----------|------------|------|------|-----|--------------------------------------------------|-------|------------|------------|----|----|---|---|
| 286.2168 | 286.2171   | -0.3 | -1.0 | 6.5 | C <sub>19</sub> H <sub>28</sub> N <sub>1</sub> O | 29.1  | n/a        | n/a        | 19 | 28 | 1 | 1 |

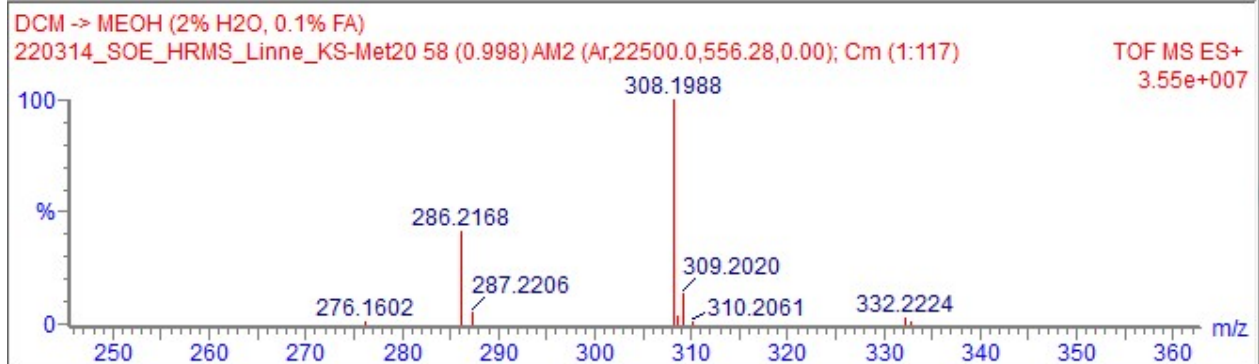

HRMS spectra of **3q**

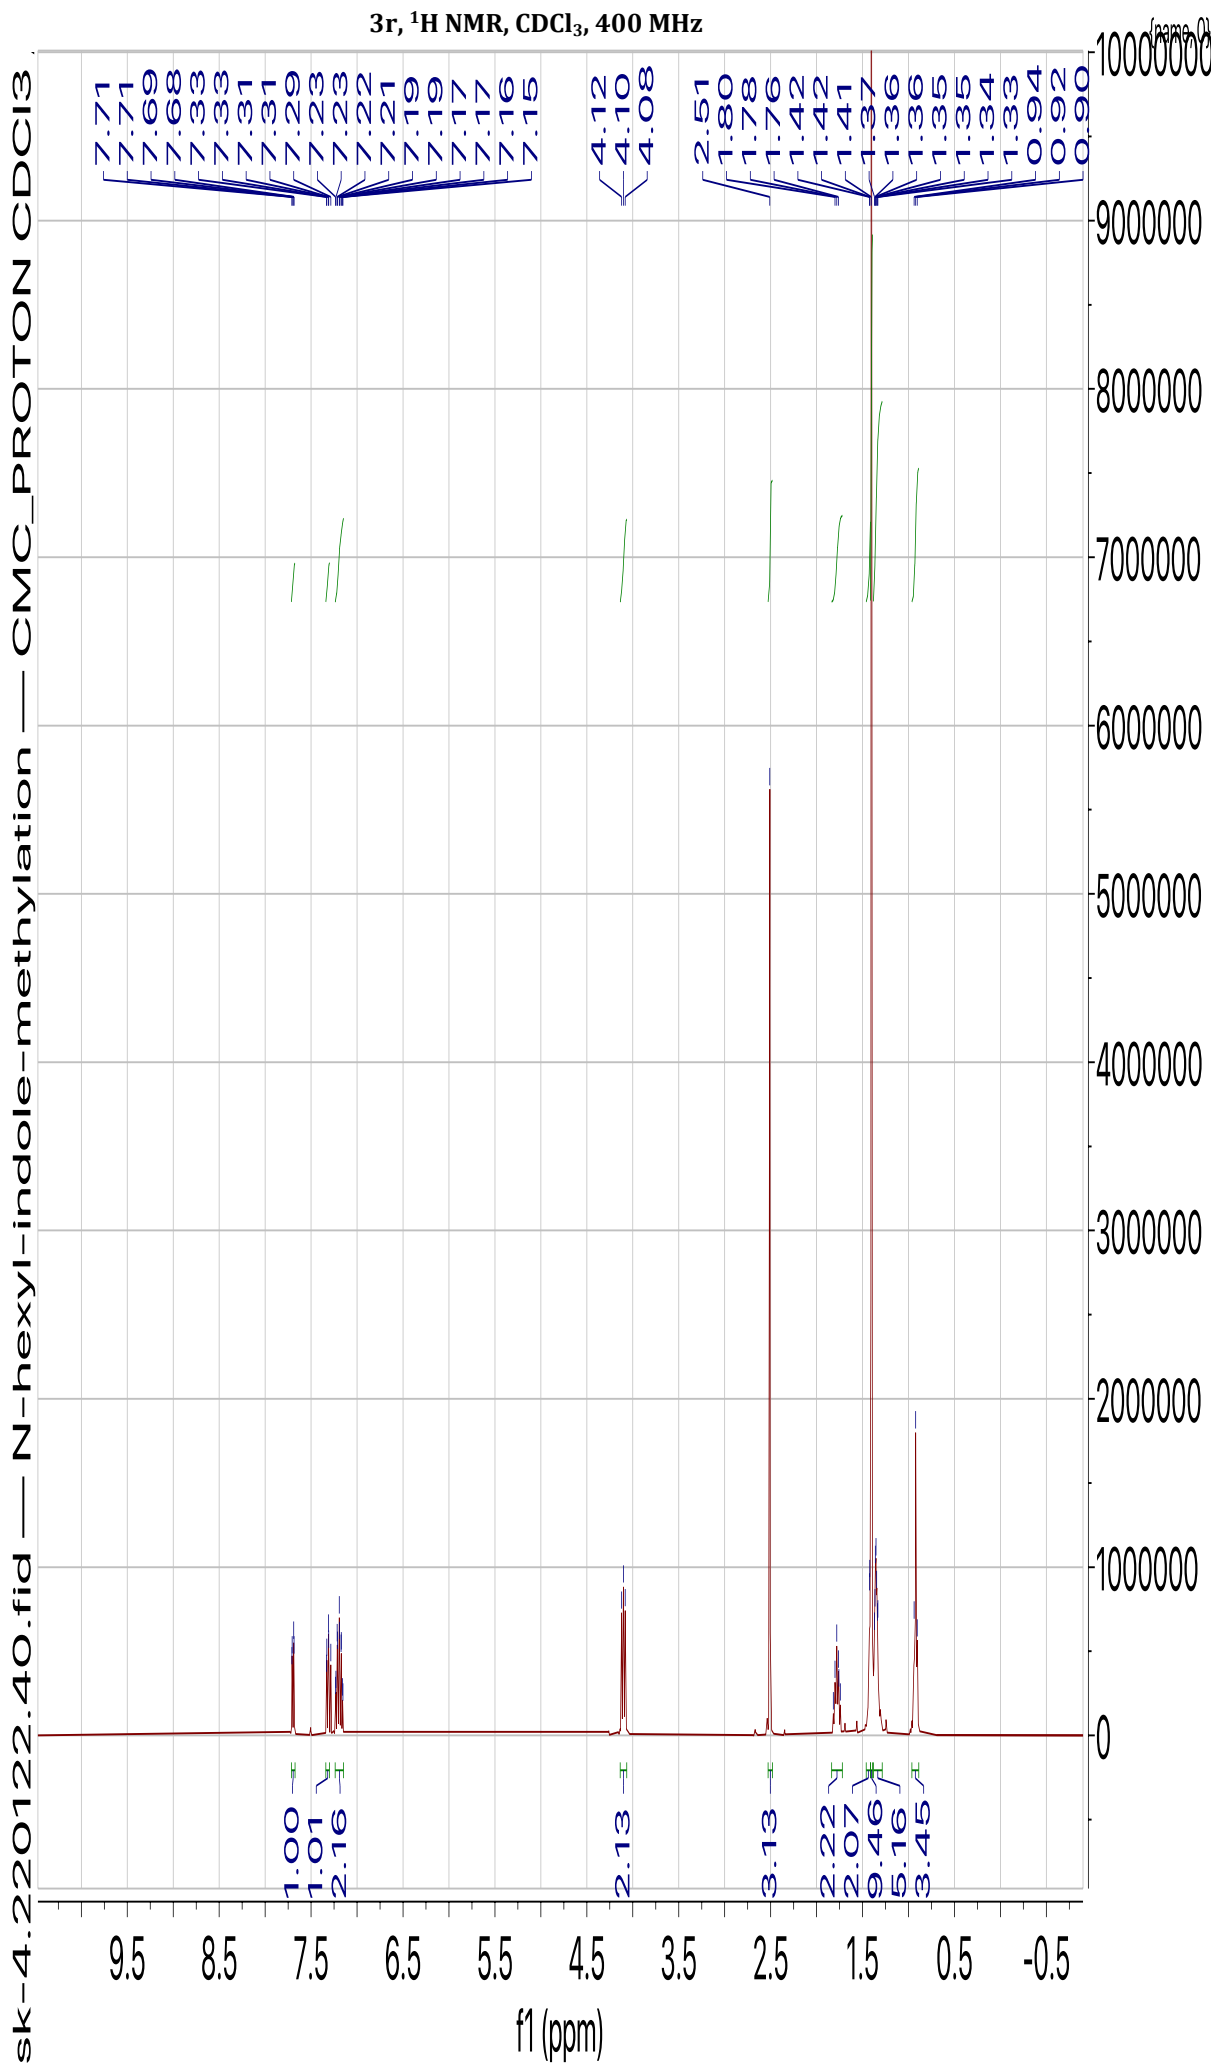

3r, <sup>13</sup>C NMR (101 MHz, CDCl<sub>3</sub>)

{name, 0}

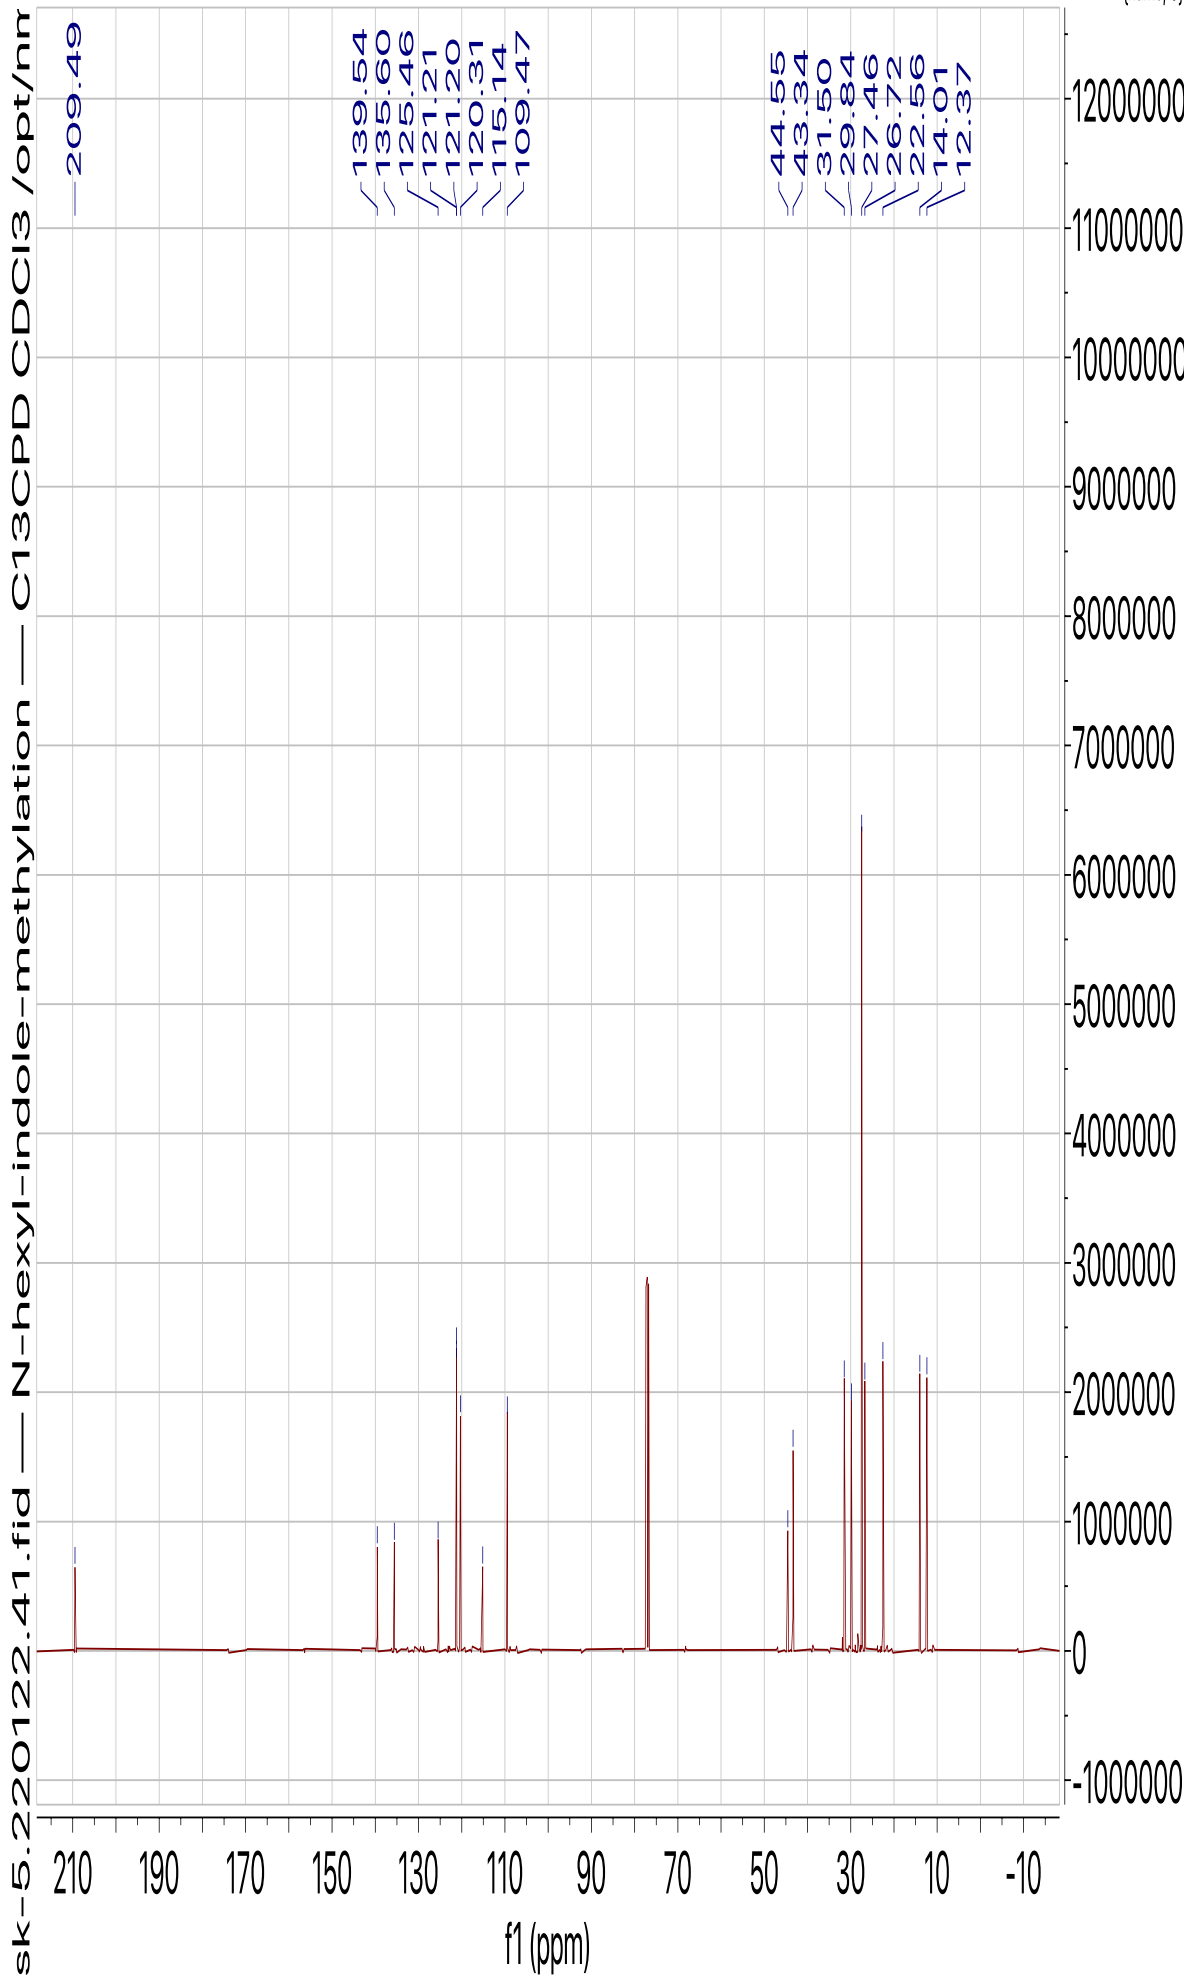

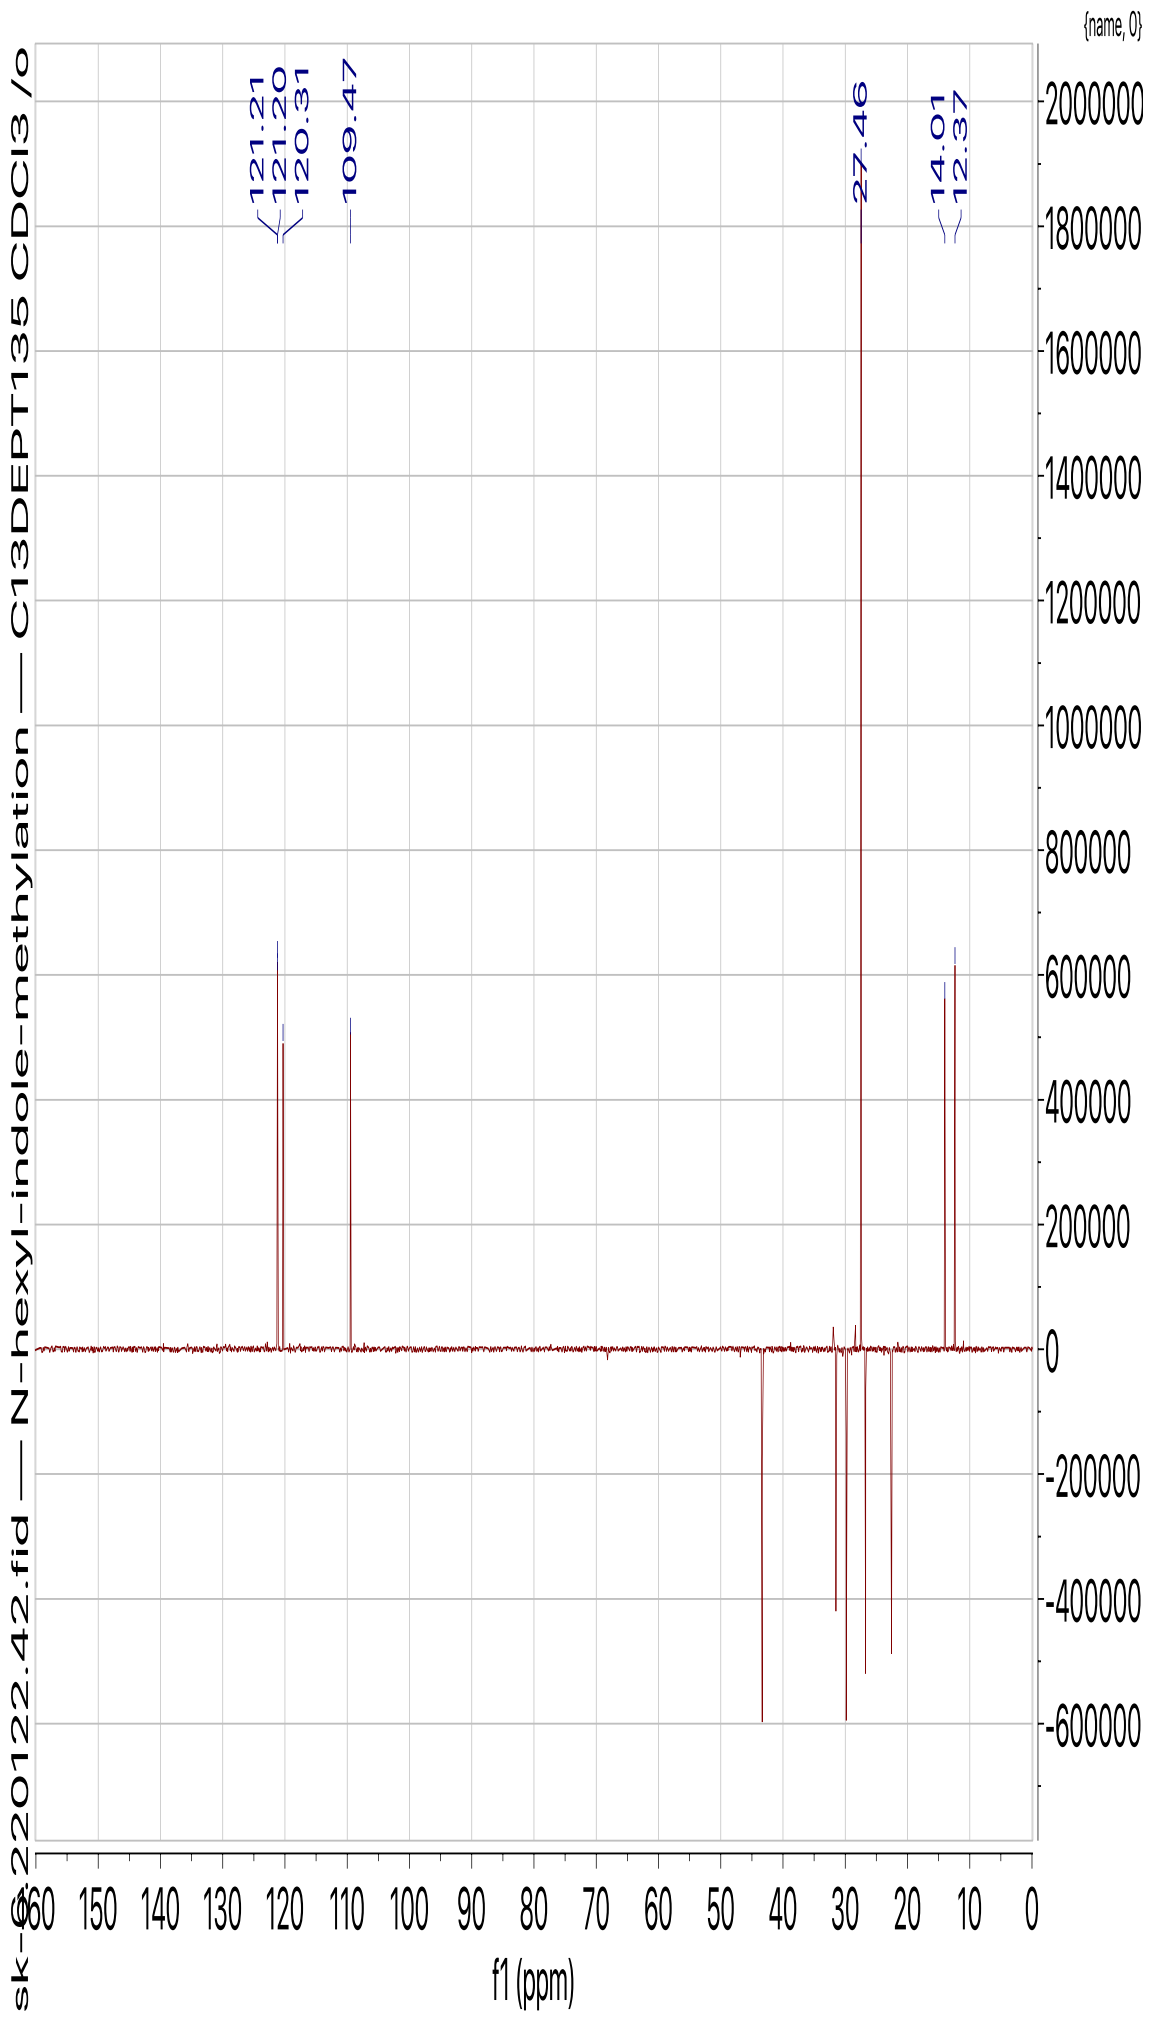

DCM -> MEOH (2% H2O, 0.1% FA)

220314\_SOE\_HRMS\_Linne\_KS-Met21 1 (0.034) AM2 (Ar,22500.0,556.28,0.00); Cm (1:117)

TOF MS ES+  
1.85e7

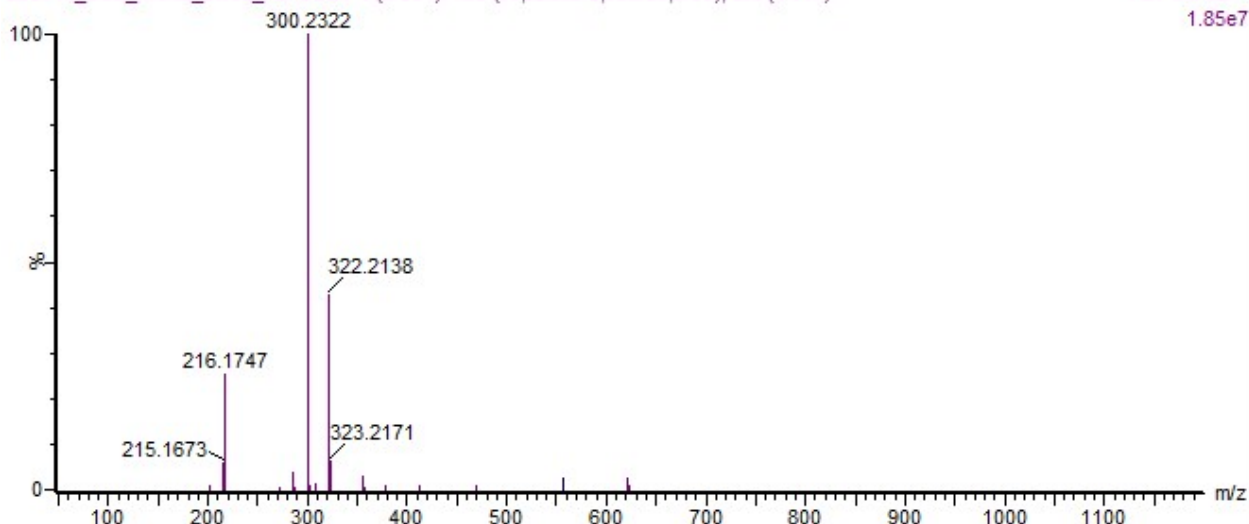

**Single Mass Analysis**

Tolerance = 3.0 mDa / DBE: min = -1.5, max = 100.0

Element prediction: Off

Number of isotope peaks used for i-FIT = 2

Monoisotopic Mass, Even Electron Ions

102 formula(e) evaluated with 1 results within limits (all results (up to 1000) for each mass)

Elements Used:

C: 0-60      H: 0-100      N: 0-1      O: 0-20

| Mass     | Calc. Mass | m... | PPM  | DBE | Formula     | i-FIT | i-FIT Norm | Fit Conf % | C  | H  | N | O |
|----------|------------|------|------|-----|-------------|-------|------------|------------|----|----|---|---|
| 300.2322 | 300.2327   | -0.5 | -1.7 | 6.5 | C20 H30 N O | 55.2  | n/a        | n/a        | 20 | 30 | 1 | 1 |

DCM -> MEOH (2% H2O, 0.1% FA)

220314\_SOE\_HRMS\_Linne\_KS-Met21 1 (0.034) AM2 (Ar,22500.0,556.28,0.00); Cm (1:117)

TOF MS ES+  
1.85e+007

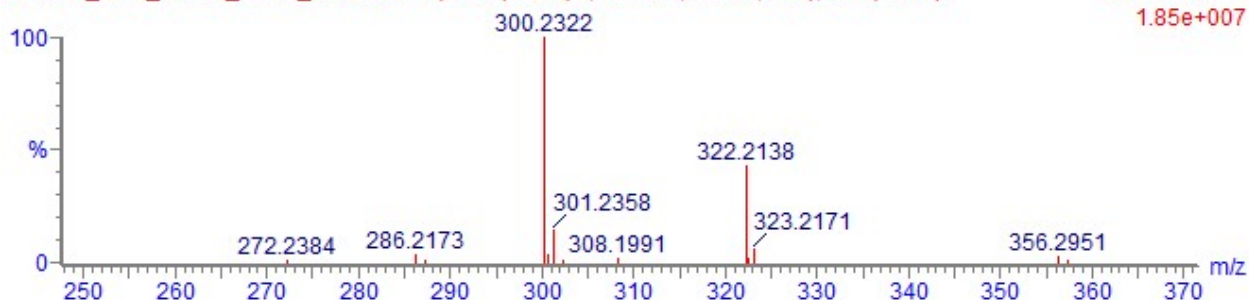

HRMS spectra of **3r**



3s, <sup>1</sup>H NMR, CDCl<sub>3</sub>, 400 MHz

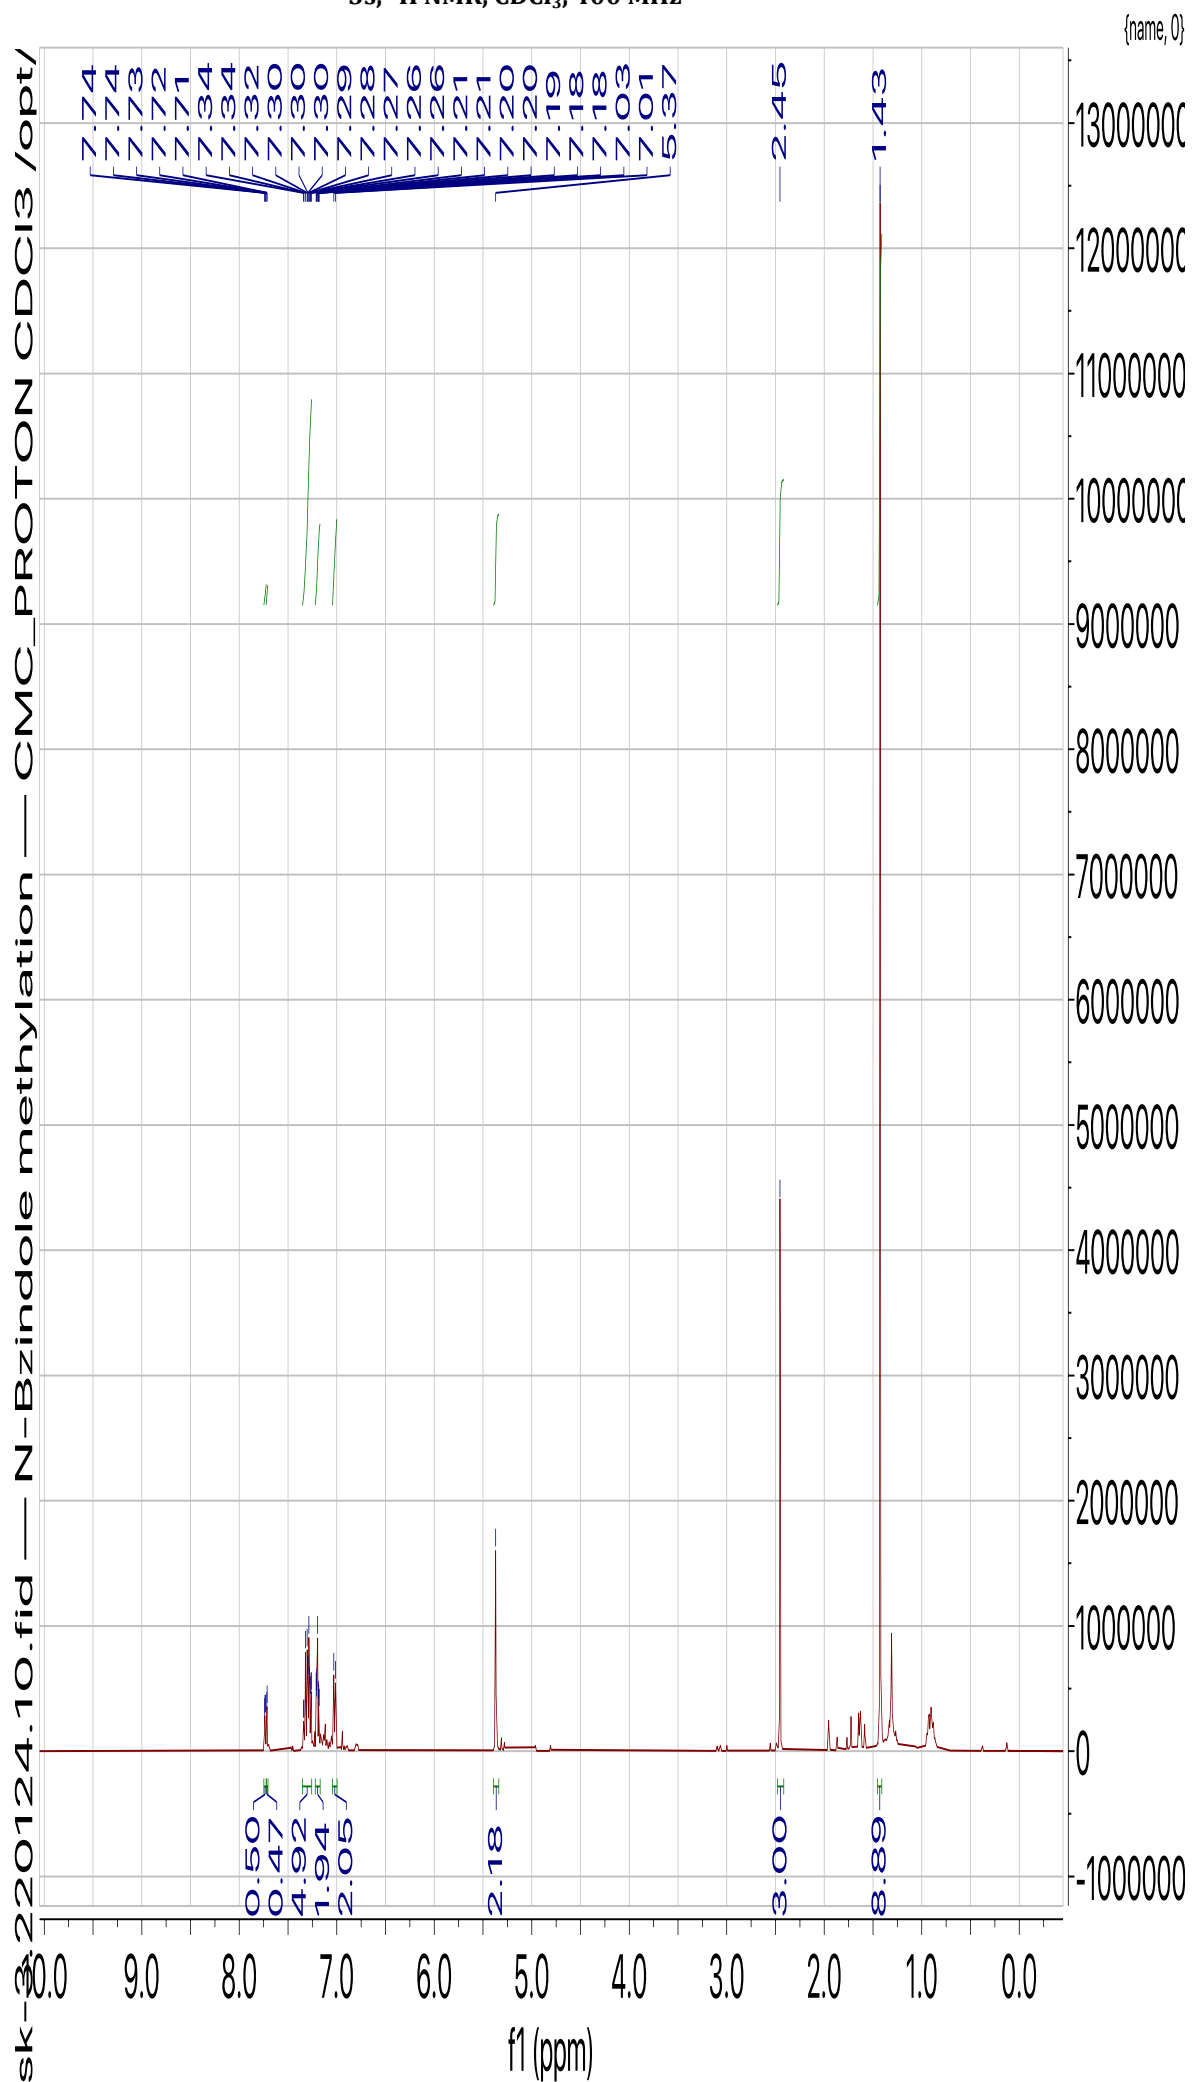

3s, <sup>13</sup>C NMR (101 MHz, CDCl<sub>3</sub>)

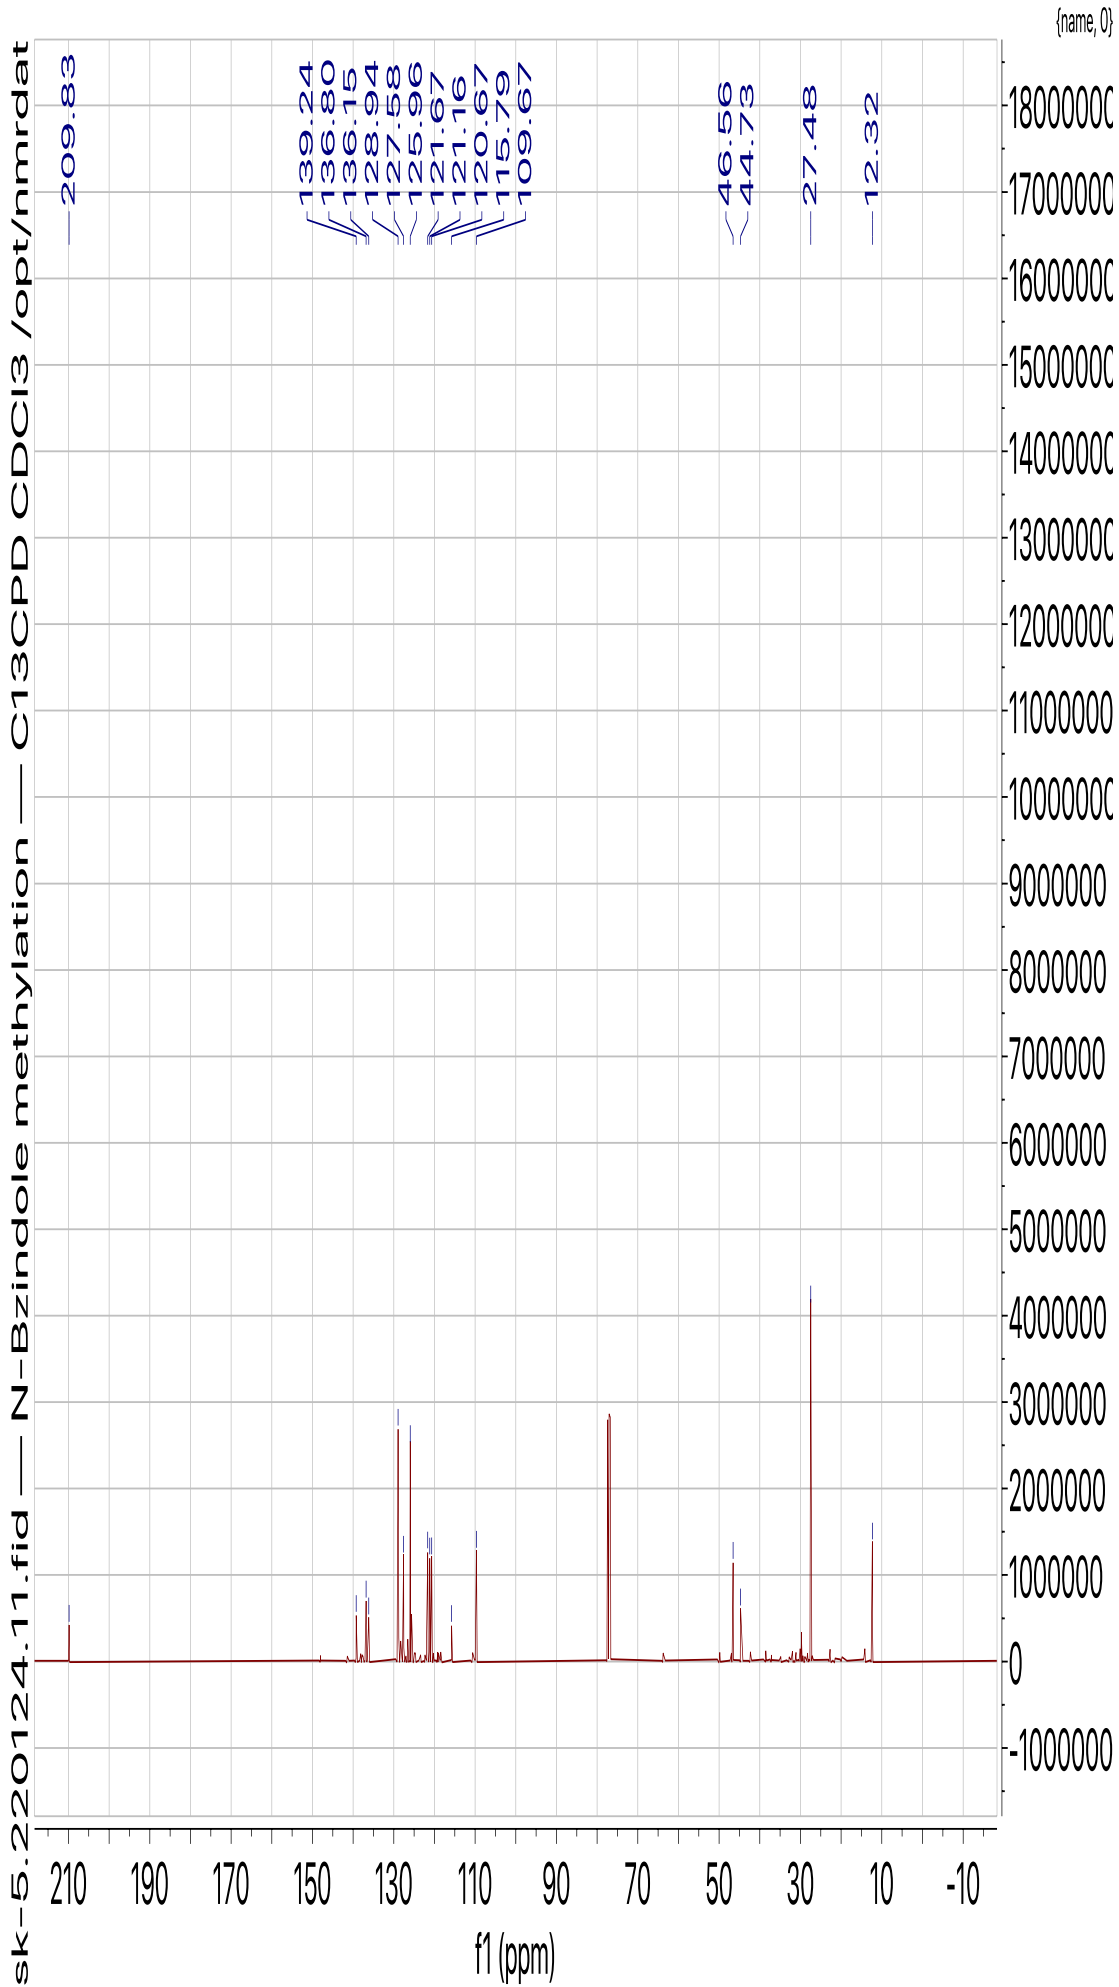

DCM -> MEOH (2% H2O, 0.1% FA)

220307\_HRMS\_Linne\_KS-Met19 111 (1.894)AM2 (Ar,22500.0,556.28,0.00); Cm (1:116)

TOF MS ES+  
5.41e6

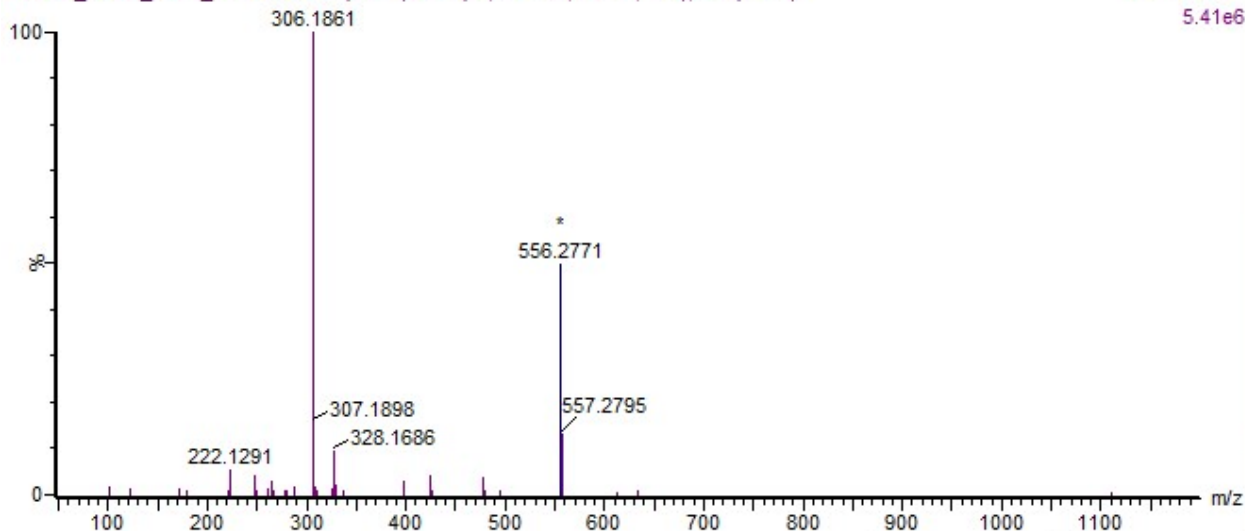

**Single Mass Analysis**

Tolerance = 2.0 mDa / DBE: min = -1.5, max = 100.0

Element prediction: Off

Number of isotope peaks used for i-FIT = 2

Monoisotopic Mass, Even Electron Ions

84 formula(e) evaluated with 1 results within limits (all results (up to 1000) for each mass)

Elements Used:

C: 0-60      H: 0-100      N: 0-3      O: 0-4

| Mass     | Calc. Mass | mDa | PPM | DBE  | Formula     | i-FIT | i-F... | Fit Conf % | C  | H  | N | O |
|----------|------------|-----|-----|------|-------------|-------|--------|------------|----|----|---|---|
| 306.1861 | 306.1858   | 0.3 | 1.0 | 10.5 | C21 H24 N O | 26.3  | n/a    | n/a        | 21 | 24 | 1 | 1 |

DCM -> MEOH (2% H2O, 0.1% FA)

220307\_HRMS\_Linne\_KS-Met19 111 (1.894)AM2 (Ar,22500.0,556.28,0.00); Cm (1:116)

TOF MS ES+  
5.41e+006

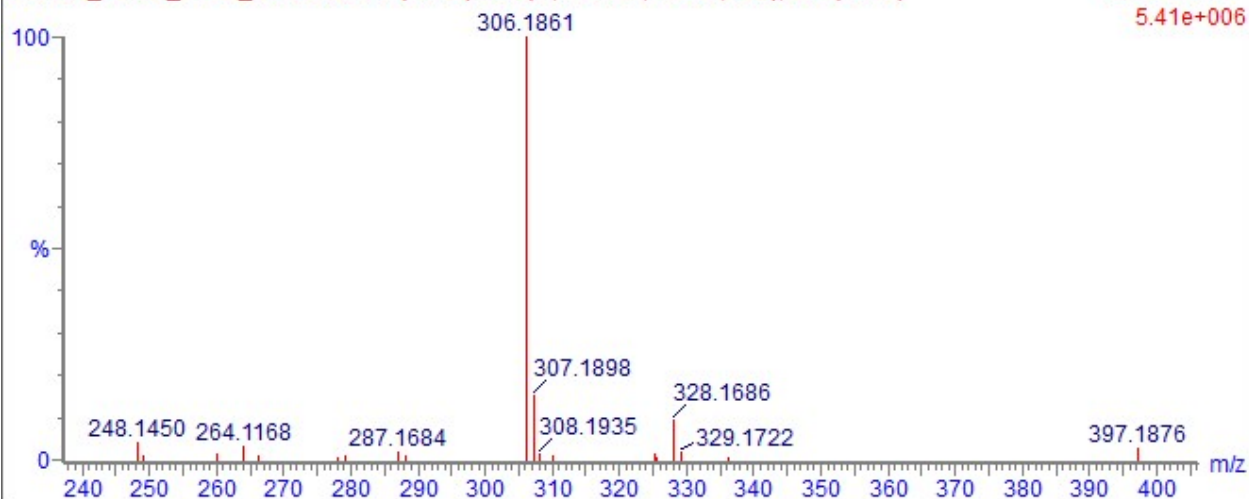

HRMS spectra of 3s

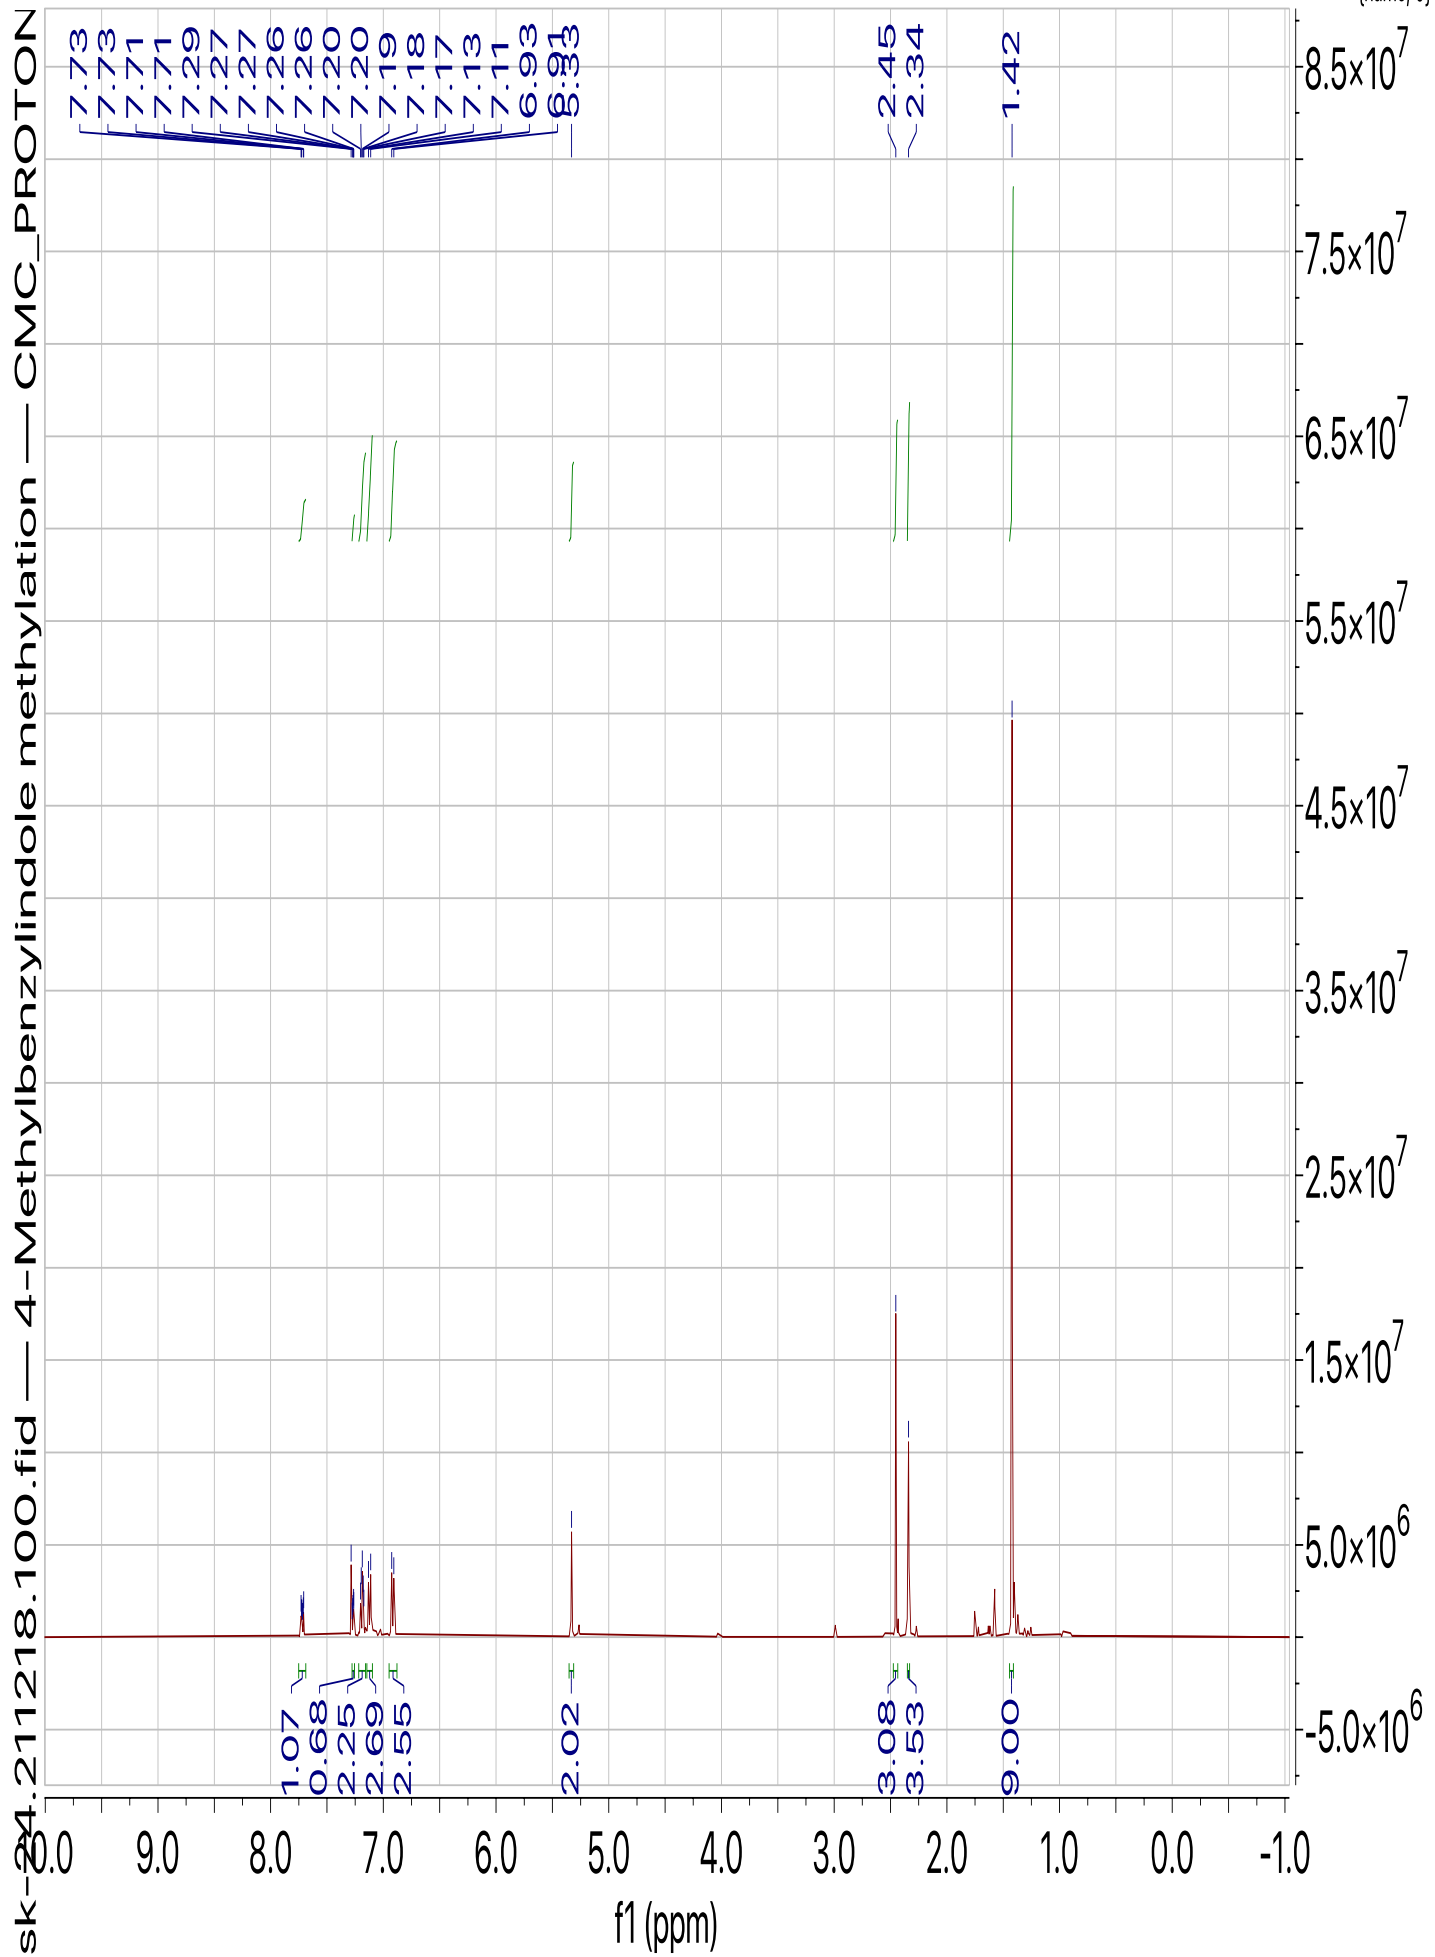

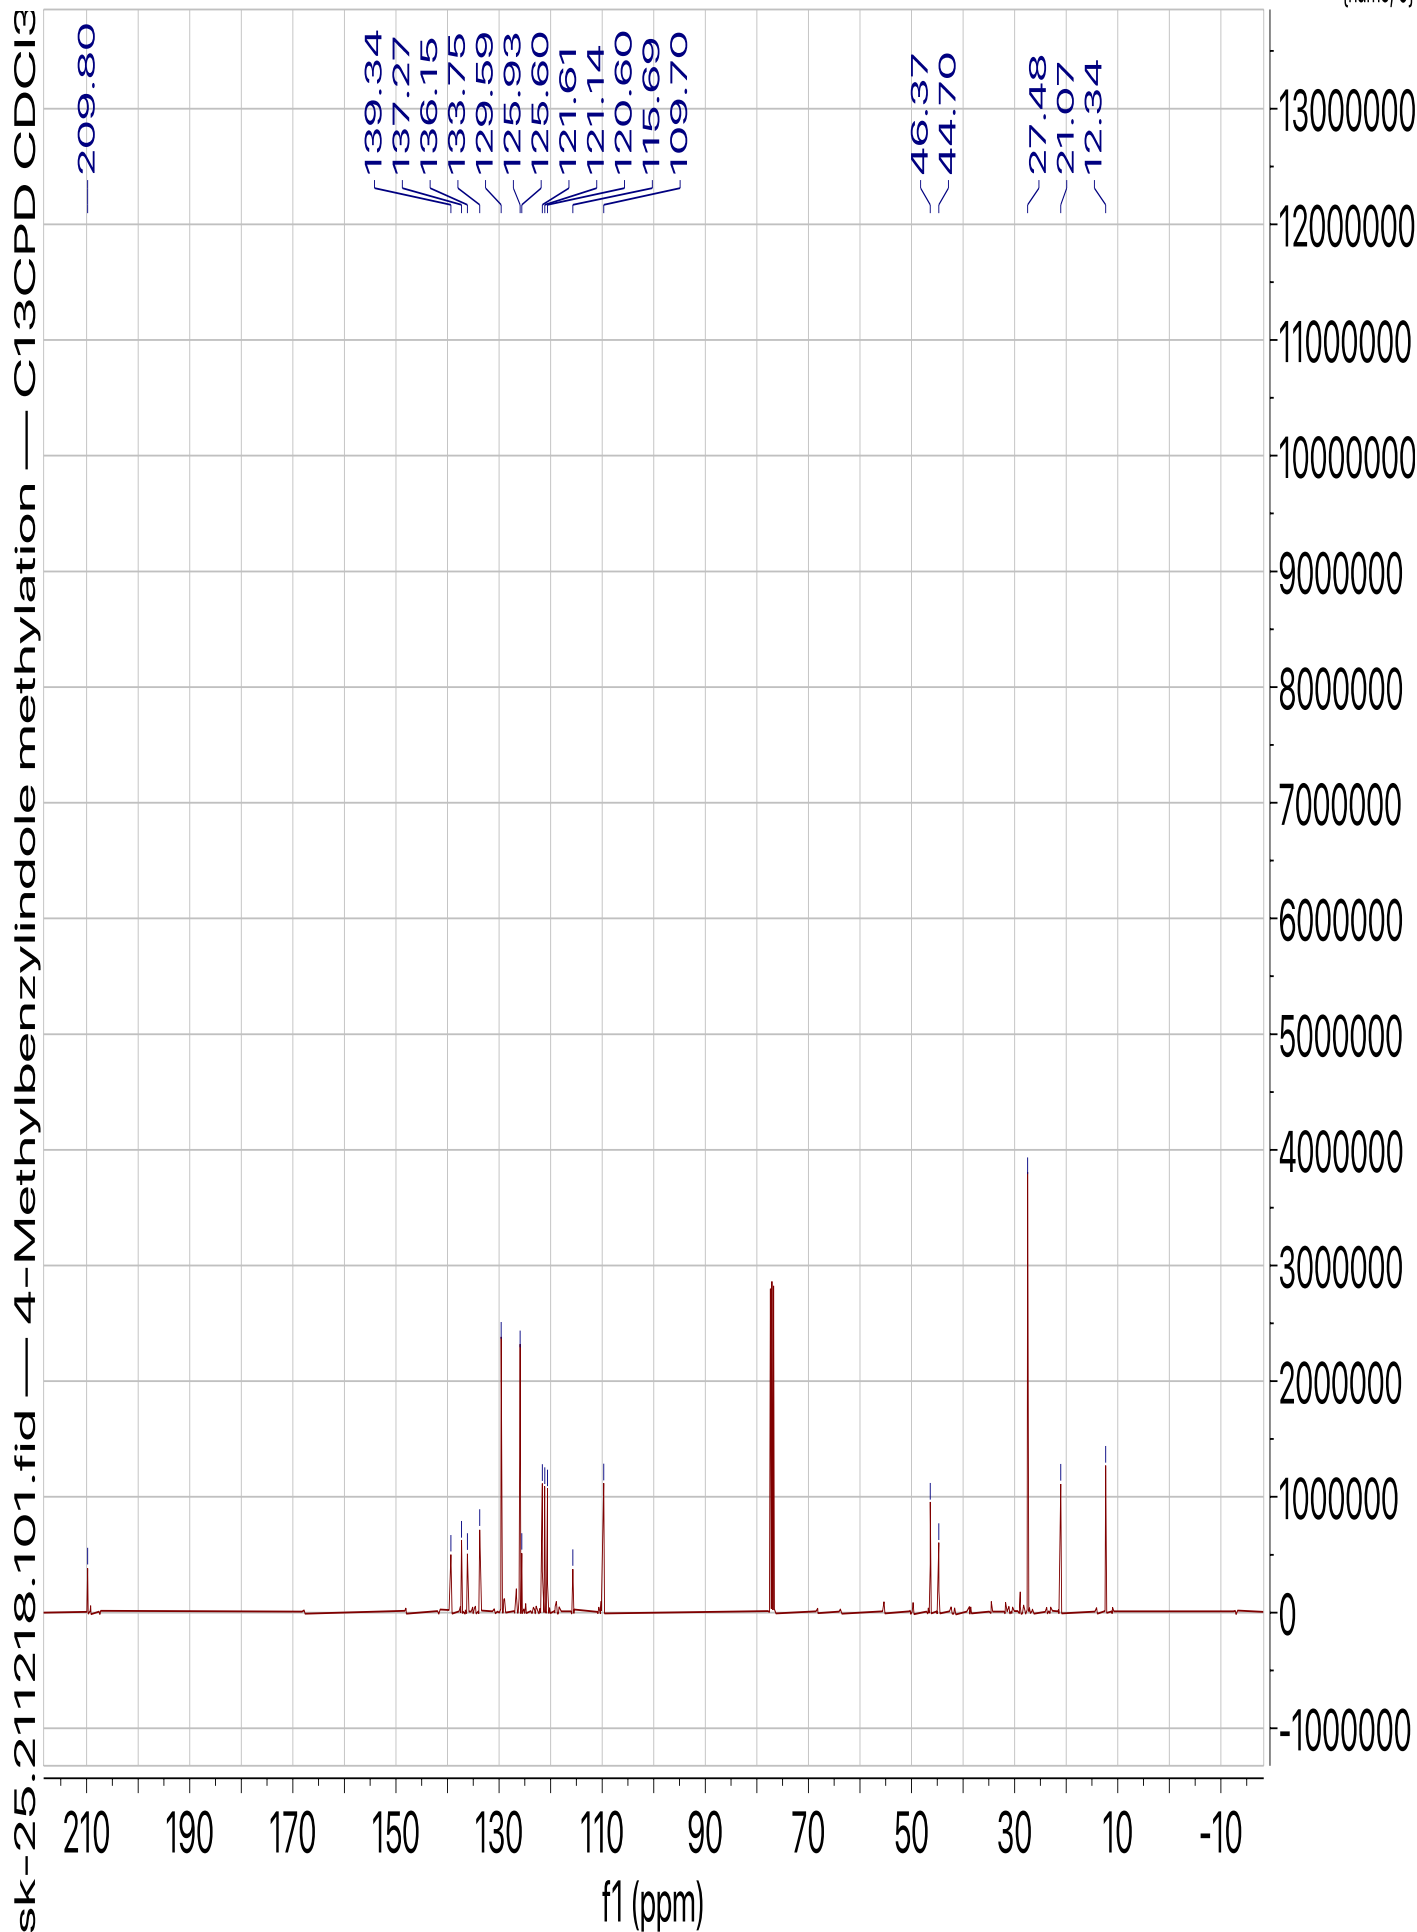

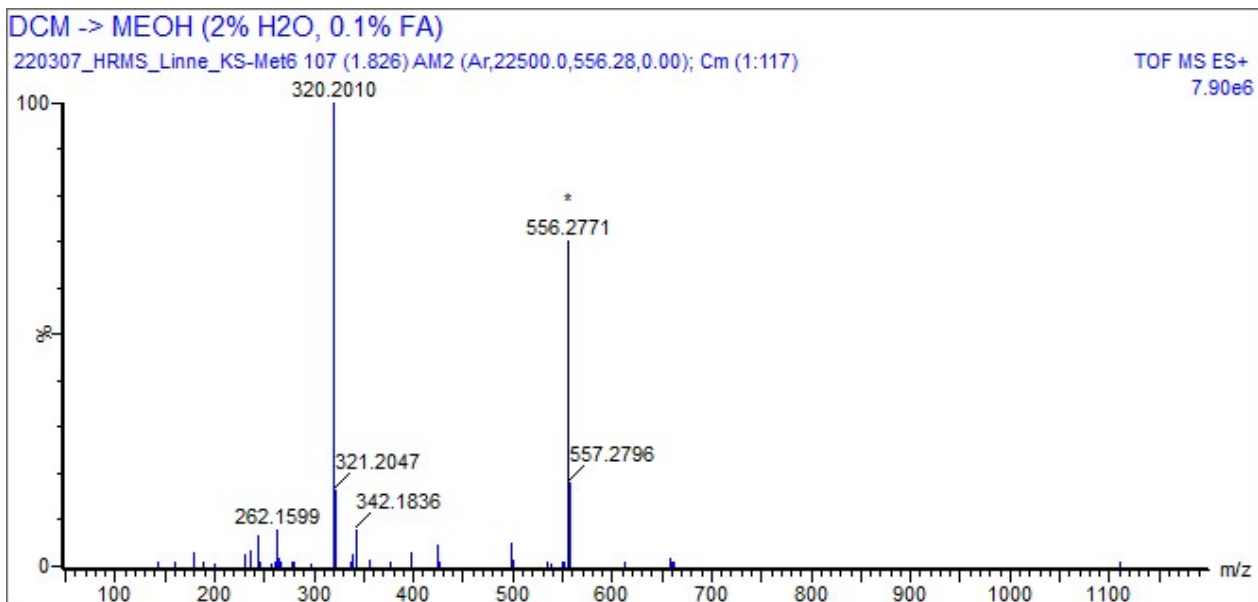

### Single Mass Analysis

Tolerance = 2.0 mDa / DBE: min = -1.5, max = 100.0

Element prediction: Off

Number of isotope peaks used for i-FIT = 2

Monoisotopic Mass, Even Electron Ions

87 formula(e) evaluated with 1 results within limits (all results (up to 1000) for each mass)

Elements Used:

C: 0-60      H: 0-100      N: 0-3      O: 0-4

| Mass     | Calc. Mass | mDa  | PPM  | DBE  | Formula                             | i-FIT | i-FIT Norm | Fit Conf % | C  | H  | N | O |
|----------|------------|------|------|------|-------------------------------------|-------|------------|------------|----|----|---|---|
| 320.2010 | 320.2014   | -0.4 | -1.2 | 10.5 | C <sub>22</sub> H <sub>26</sub> N O | 27.0  | n/a        | n/a        | 22 | 26 | 1 | 1 |

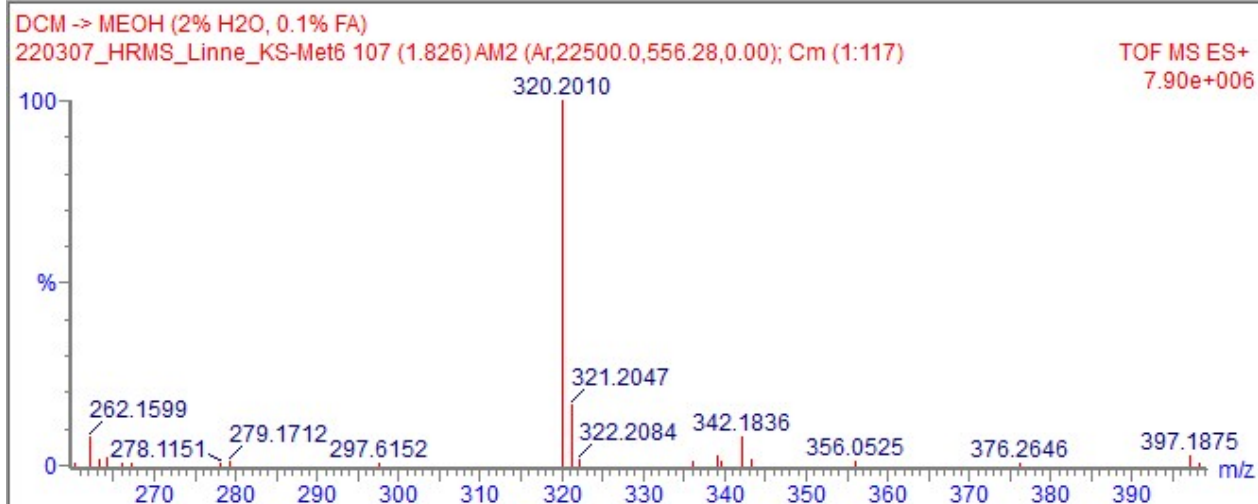

HRMS spectra of **3t**

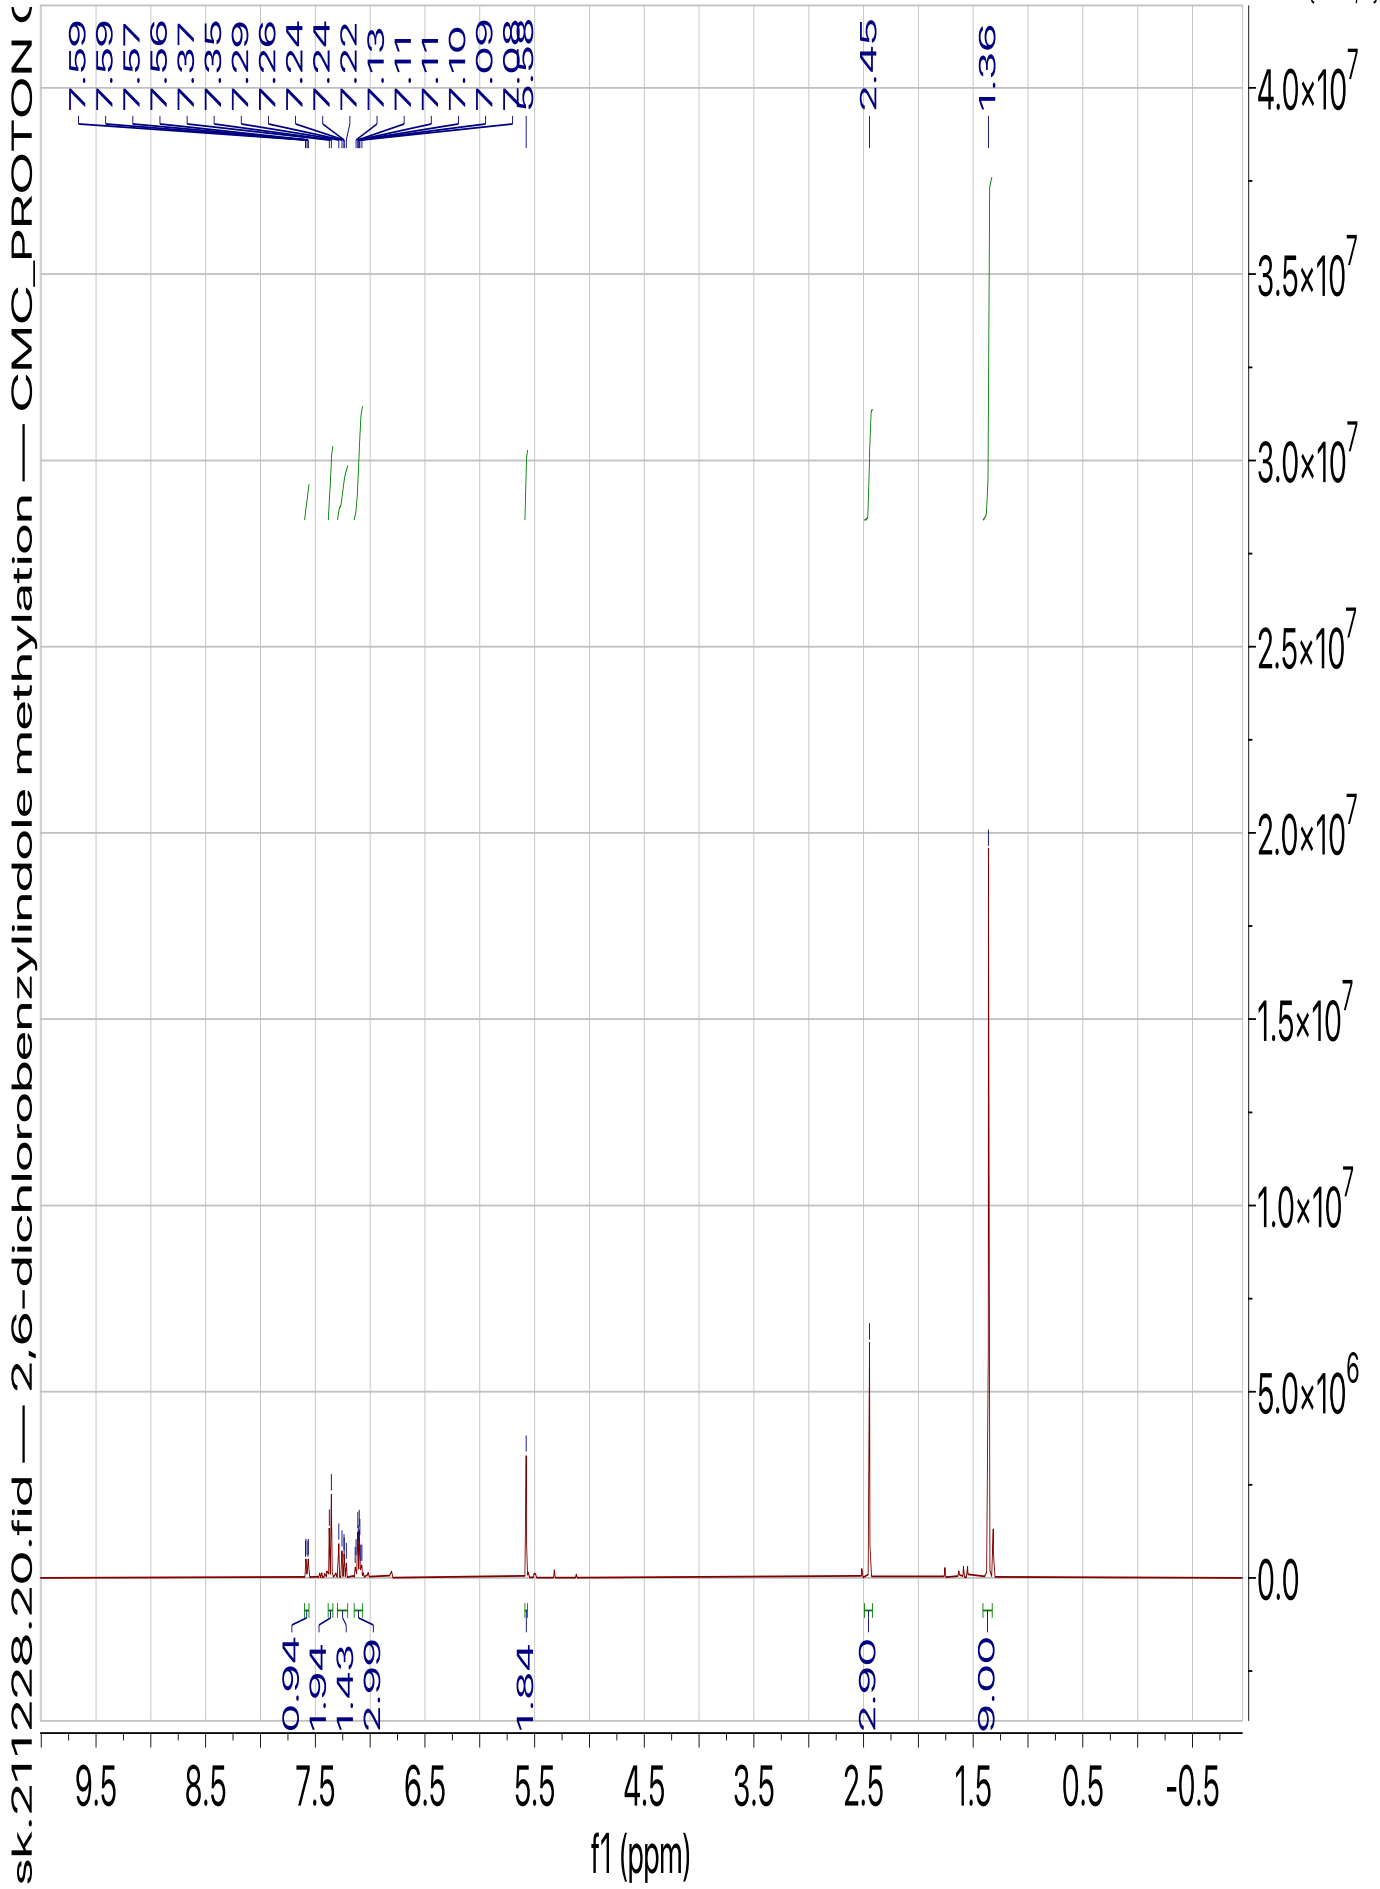

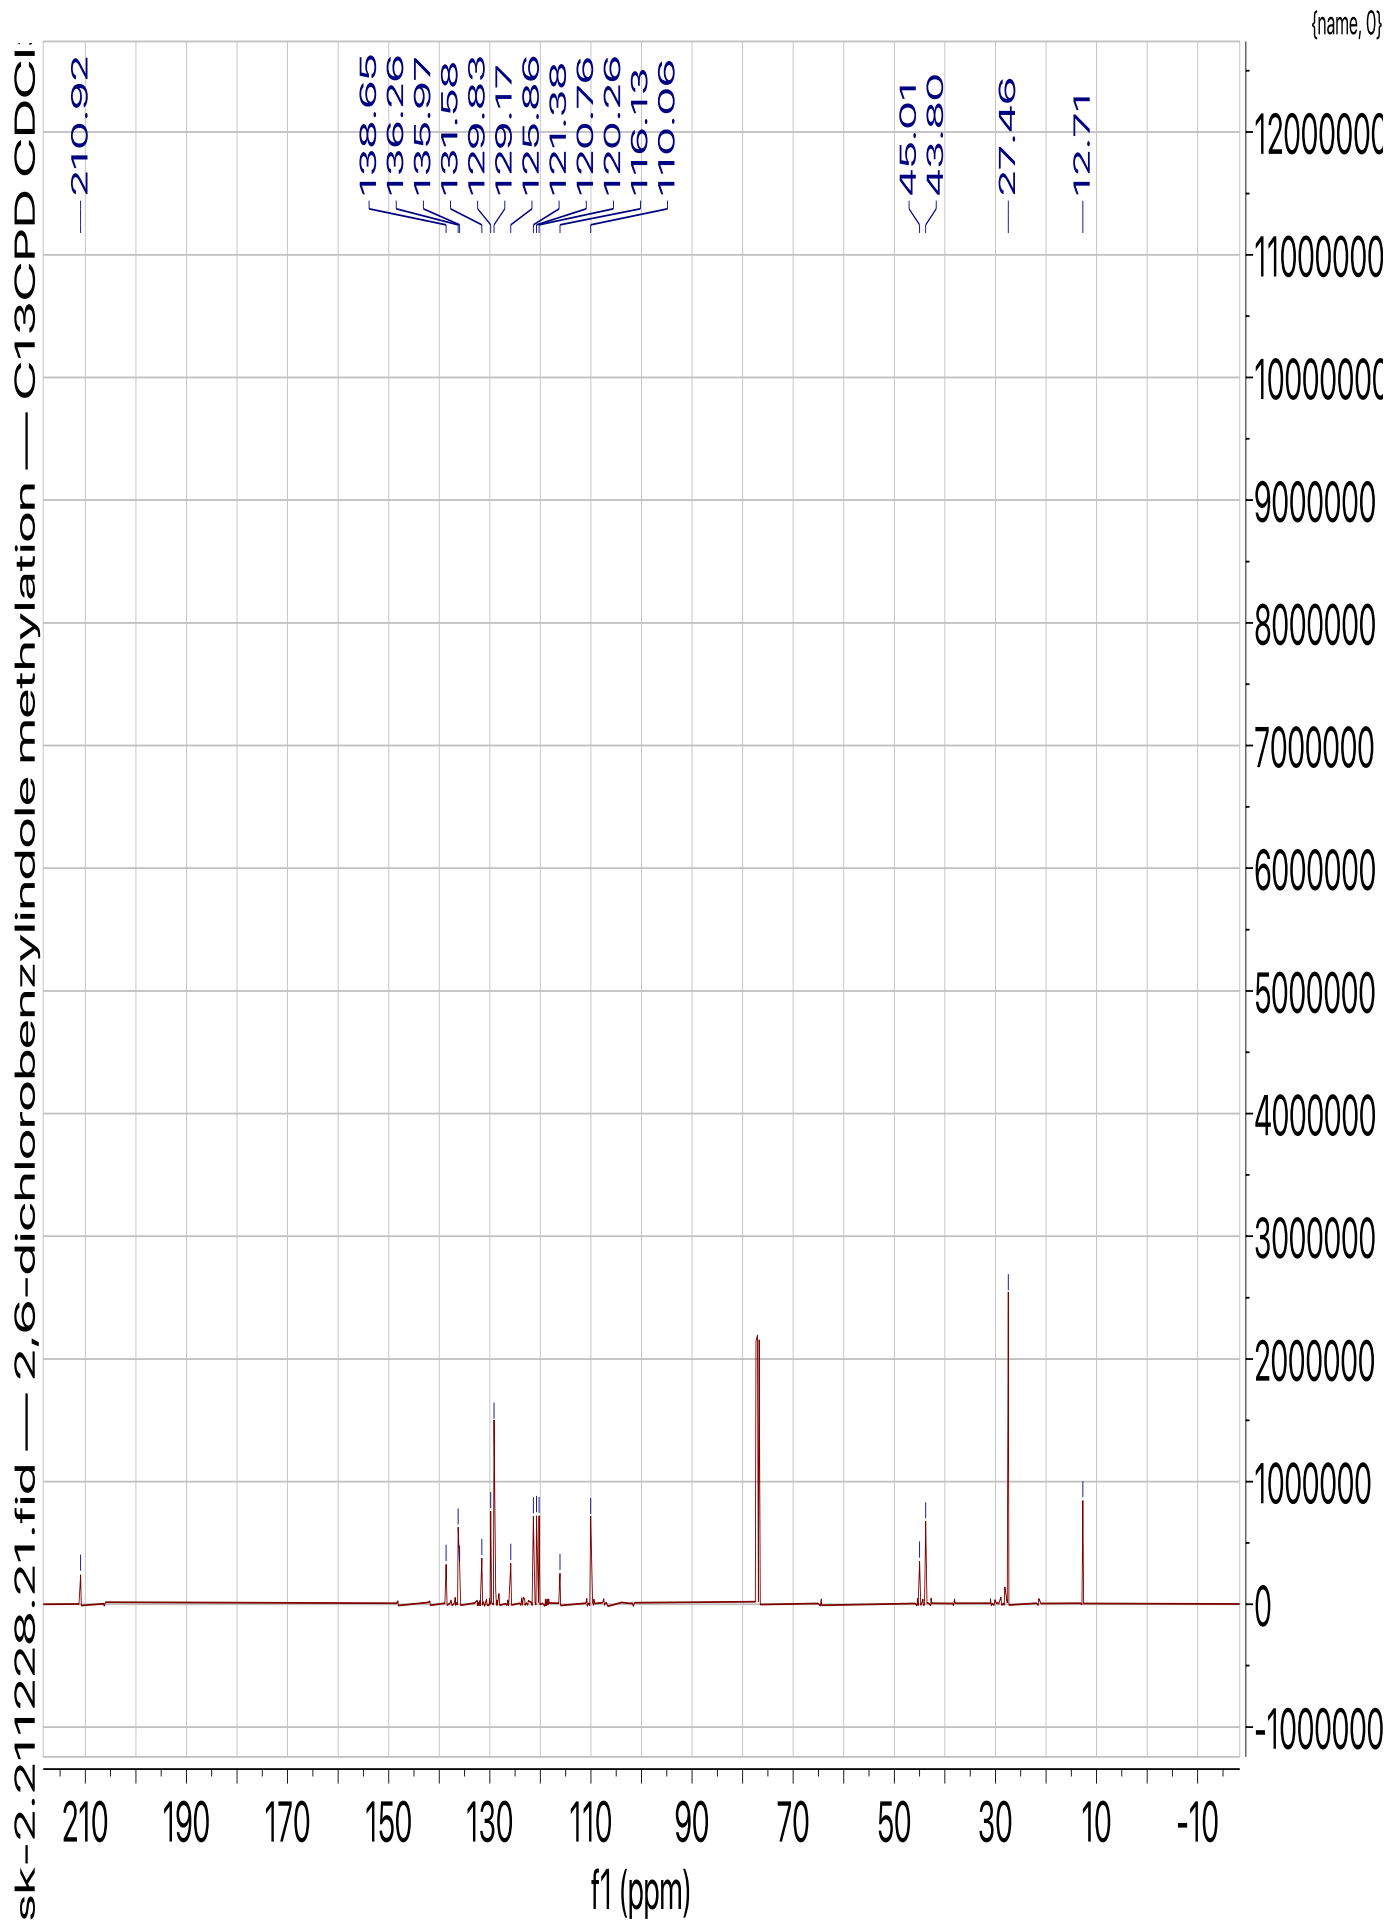



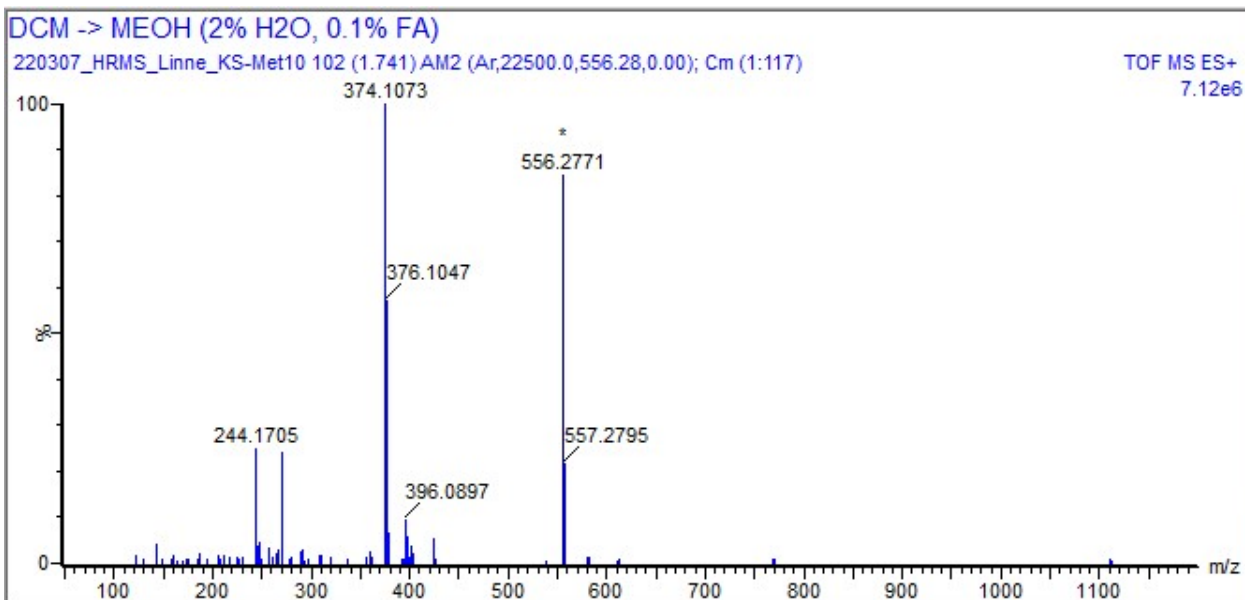

### Single Mass Analysis

Tolerance = 2.0 mDa / DBE: min = -1.5, max = 100.0

Element prediction: Off

Number of isotope peaks used for i-FIT = 2

Monoisotopic Mass, Even Electron Ions

266 formula(e) evaluated with 2 results within limits (all results (up to 1000) for each mass)

Elements Used:

C: 0-60      H: 0-100      N: 0-3      O: 0-4      Cl: 0-2

| Mass     | Calc. Mass | mDa  | PPM  | DBE  | Formula                                             | i-FIT ... | Fit Conf % | C  | H  | N | O | Cl |
|----------|------------|------|------|------|-----------------------------------------------------|-----------|------------|----|----|---|---|----|
| 374.1073 | 374.1078   | -0.5 | -1.3 | 10.5 | C <sub>21</sub> H <sub>22</sub> N O Cl <sub>2</sub> | 0.105     | 90.00      | 21 | 22 | 1 | 1 | 2  |
|          | 374.1060   | 1.3  | 3.5  | 15.5 | C <sub>22</sub> H <sub>17</sub> N <sub>3</sub> O Cl | 3.302     | 10.00      | 22 | 17 | 3 | 1 | 1  |

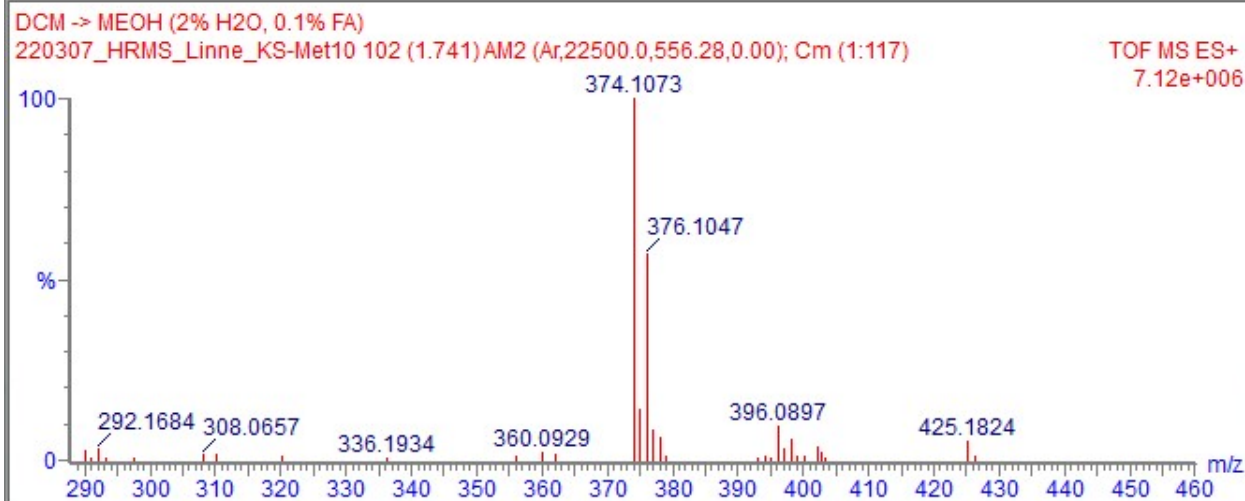

HRMS spectra of **3u**

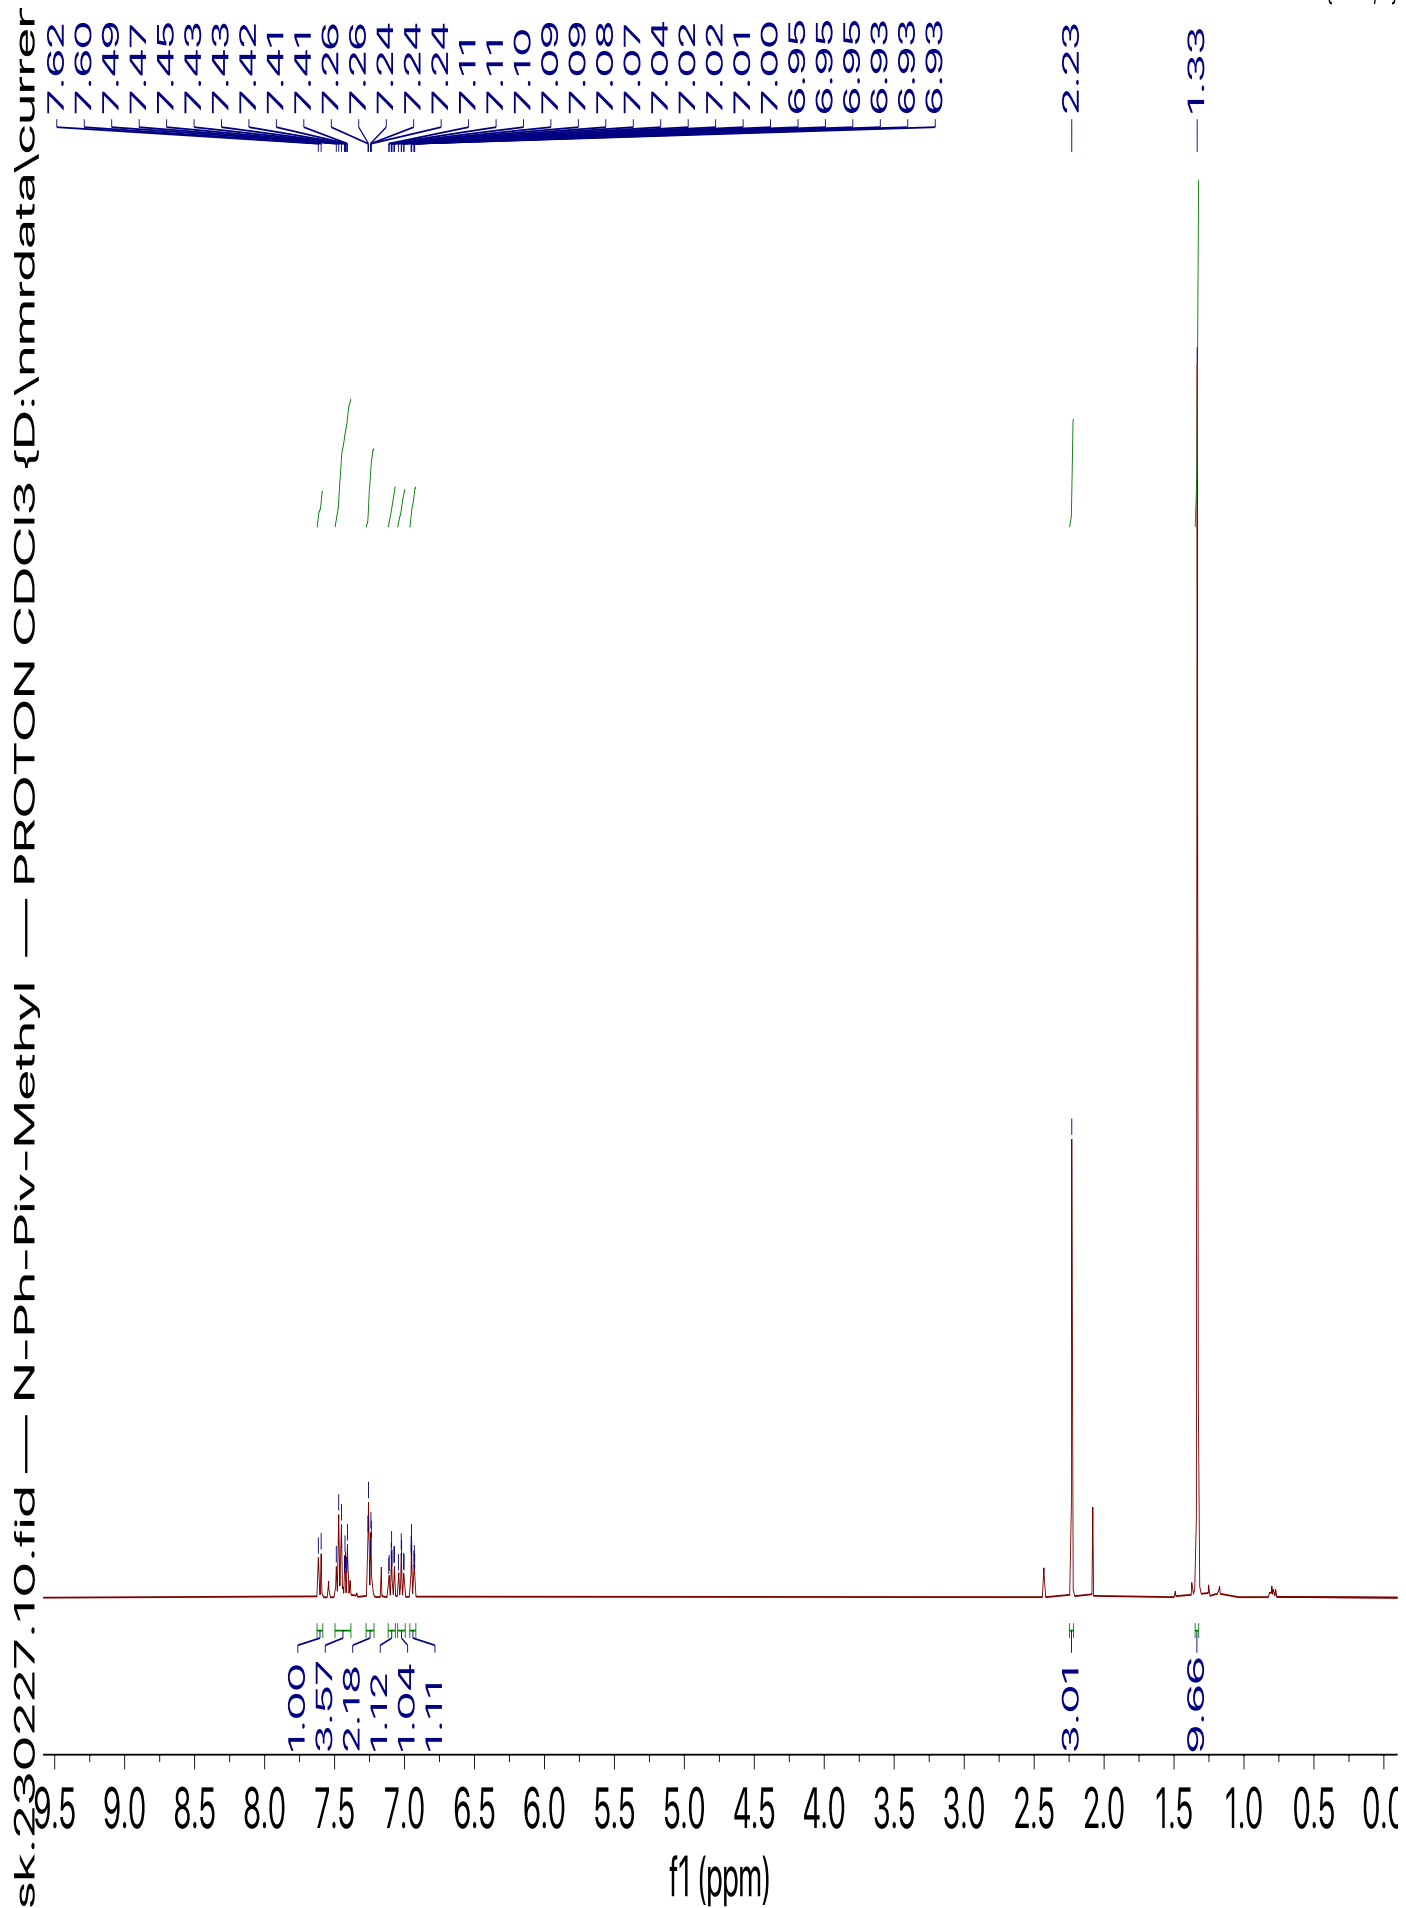

sk-2.230227.11.fid — N-Ph-Piv-Methyl — C13CPD CDCl3 {D:\nmrdata\curre

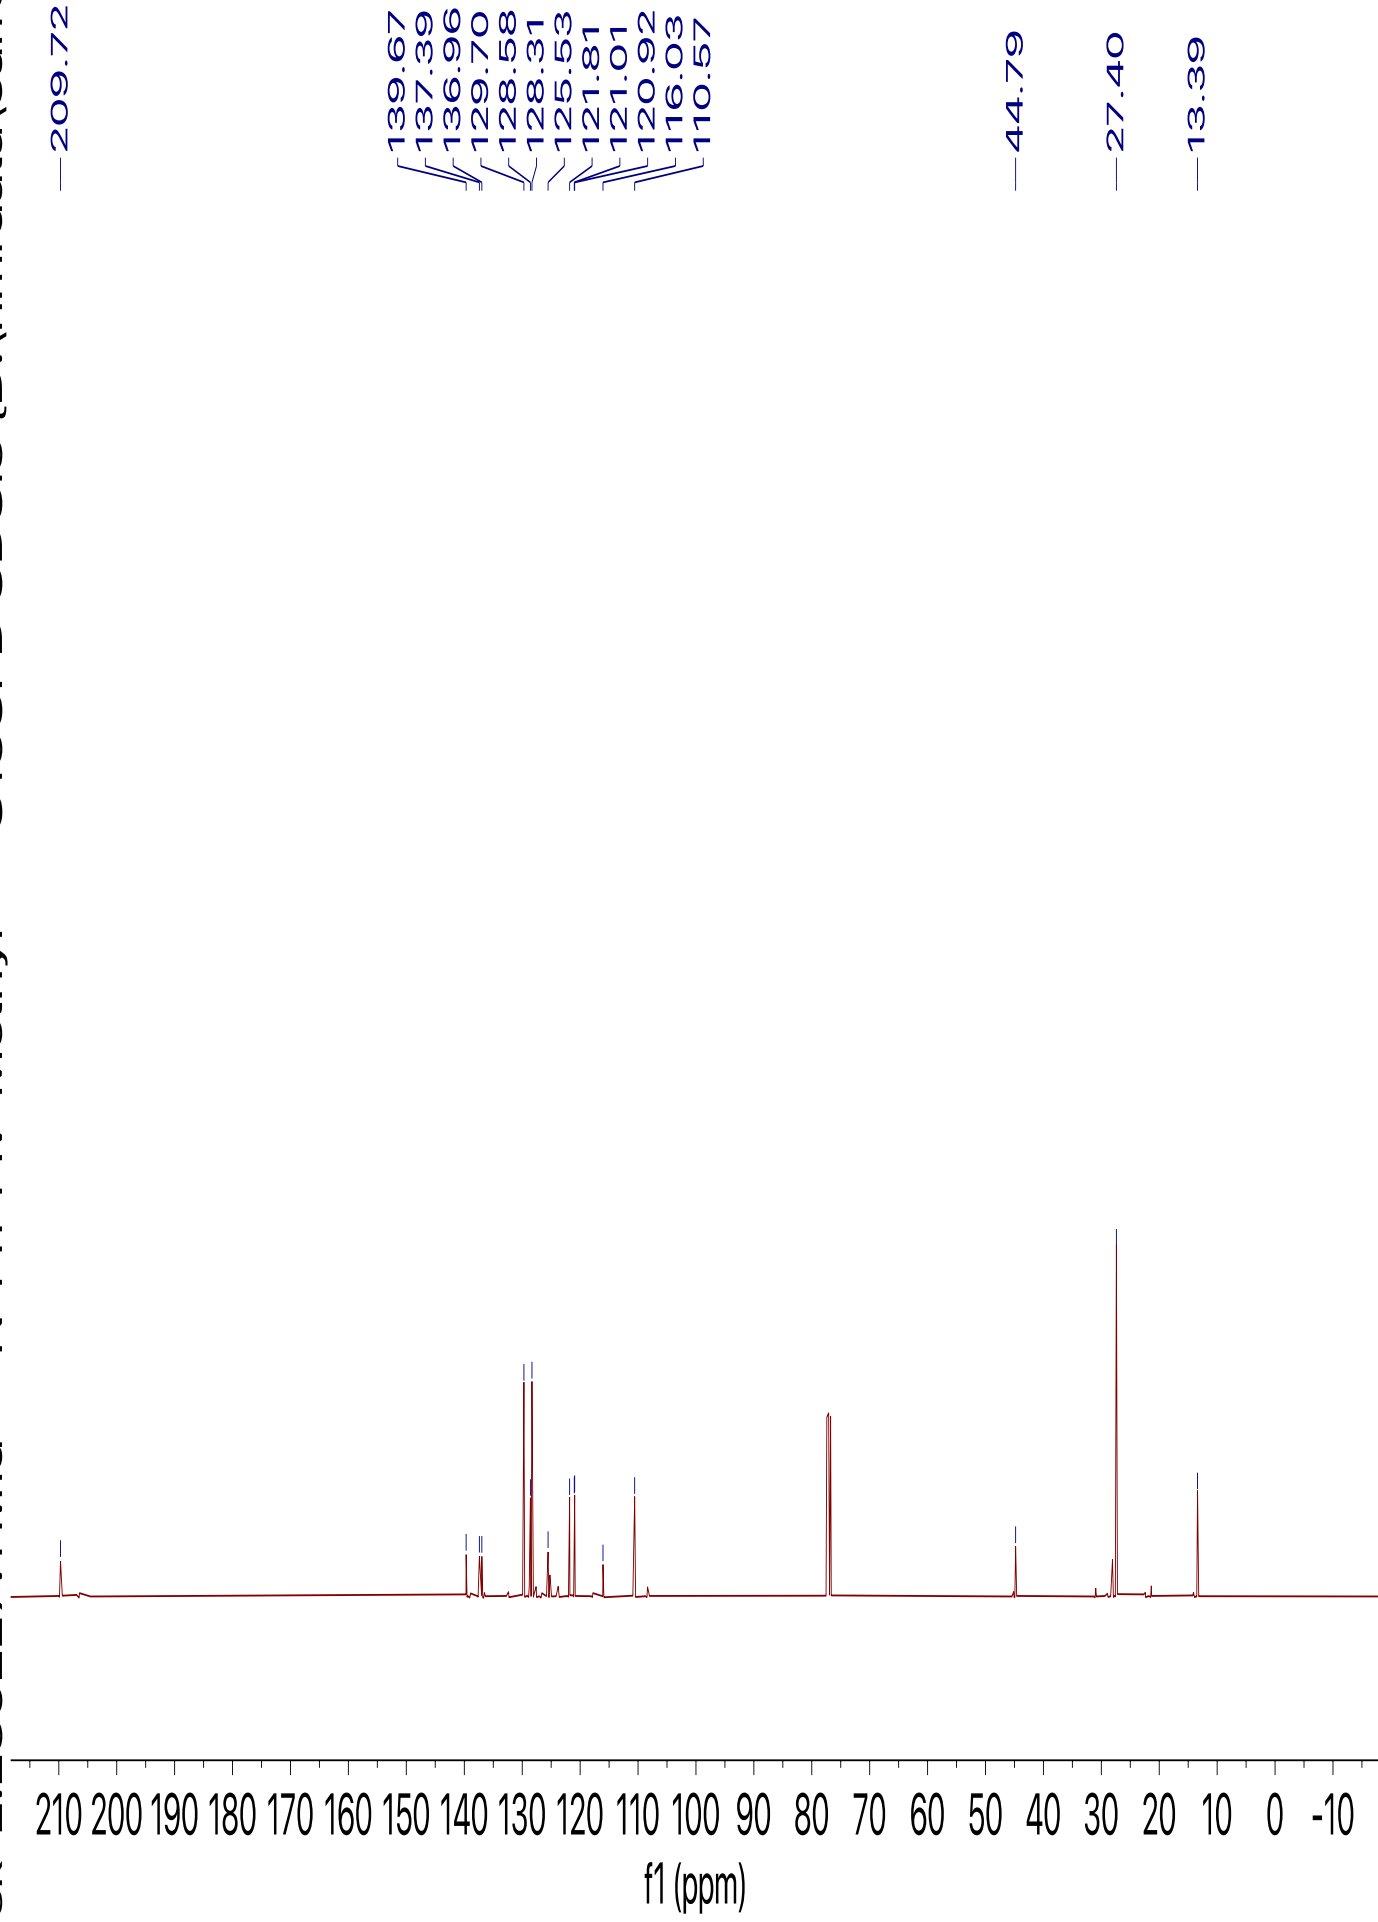

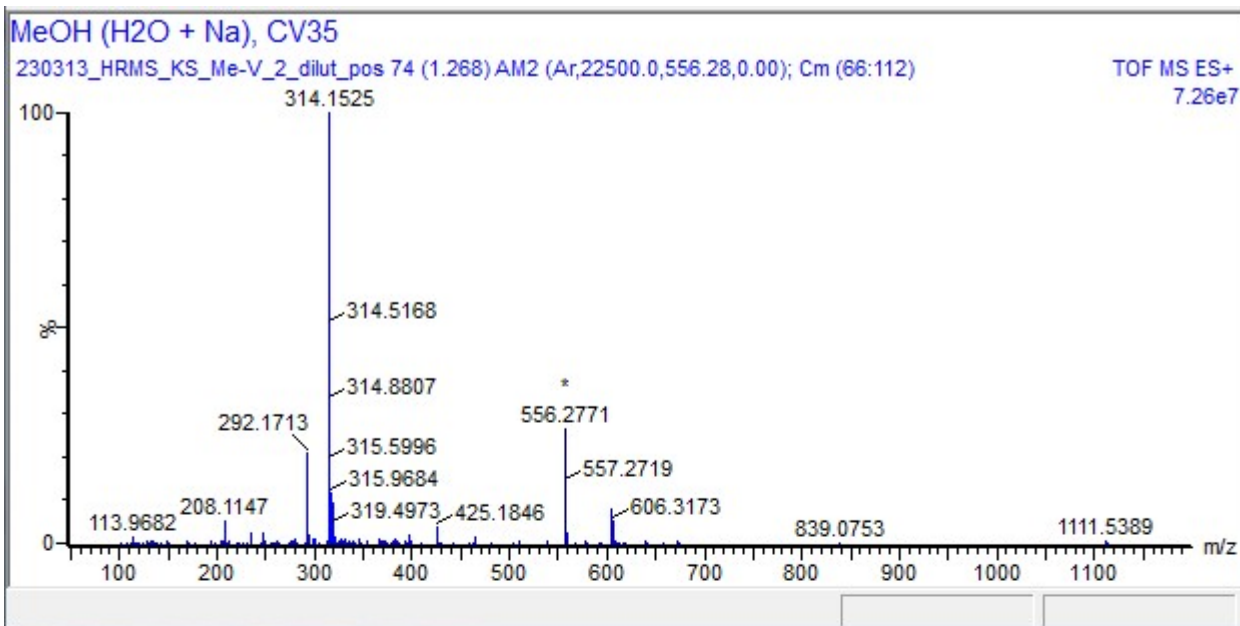

### Single Mass Analysis

Tolerance = 2.0 mDa / DBE: min = -1.5, max = 100.0

Element prediction: Off

Number of isotope peaks used for i-FIT = 2

Monoisotopic Mass, Even Electron Ions

17 formula(e) evaluated with 2 results within limits (all results (up to 1000) for each mass)

Elements Used:

C: 18-26      H: 18-24      N: 0-3      O: 0-3      Na: 0-1

| Mass     | Calc. Mass | mDa  | PPM  | DBE  | Formula                                | i..  | i.   | Fit Conf % | C  | H  | N | O | Na |
|----------|------------|------|------|------|----------------------------------------|------|------|------------|----|----|---|---|----|
| 314.1525 | 314.1521   | 0.4  | 1.3  | 10.5 | C <sub>20</sub> H <sub>21</sub> N O Na | 5... | 0... | 99.90      | 20 | 21 | 1 | 1 | 1  |
|          | 314.1545   | -2.0 | -6.4 | 13.5 | C <sub>22</sub> H <sub>20</sub> N O    | 5... | 6... | 0.10       | 22 | 20 | 1 | 1 |    |

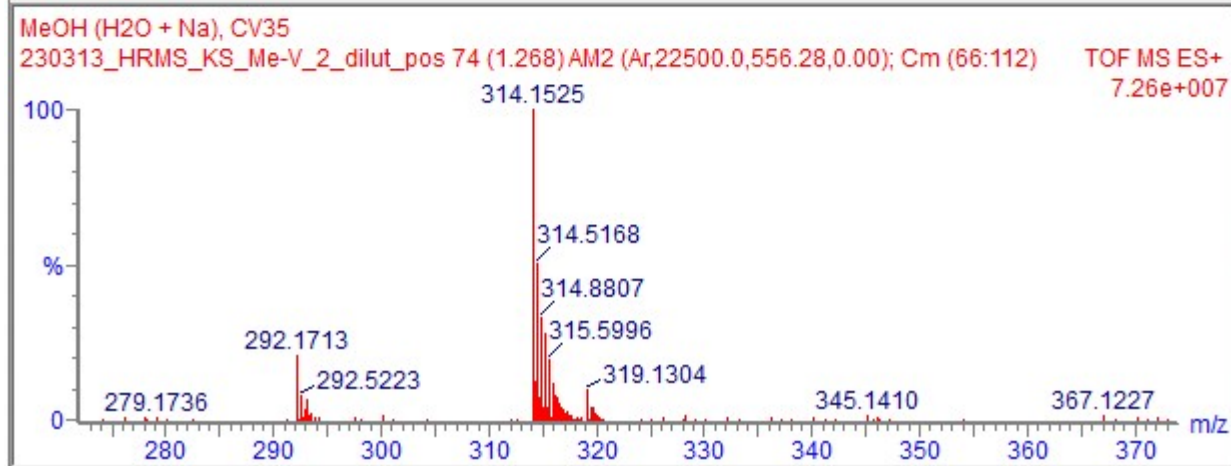

HRMS spectra of **3V**

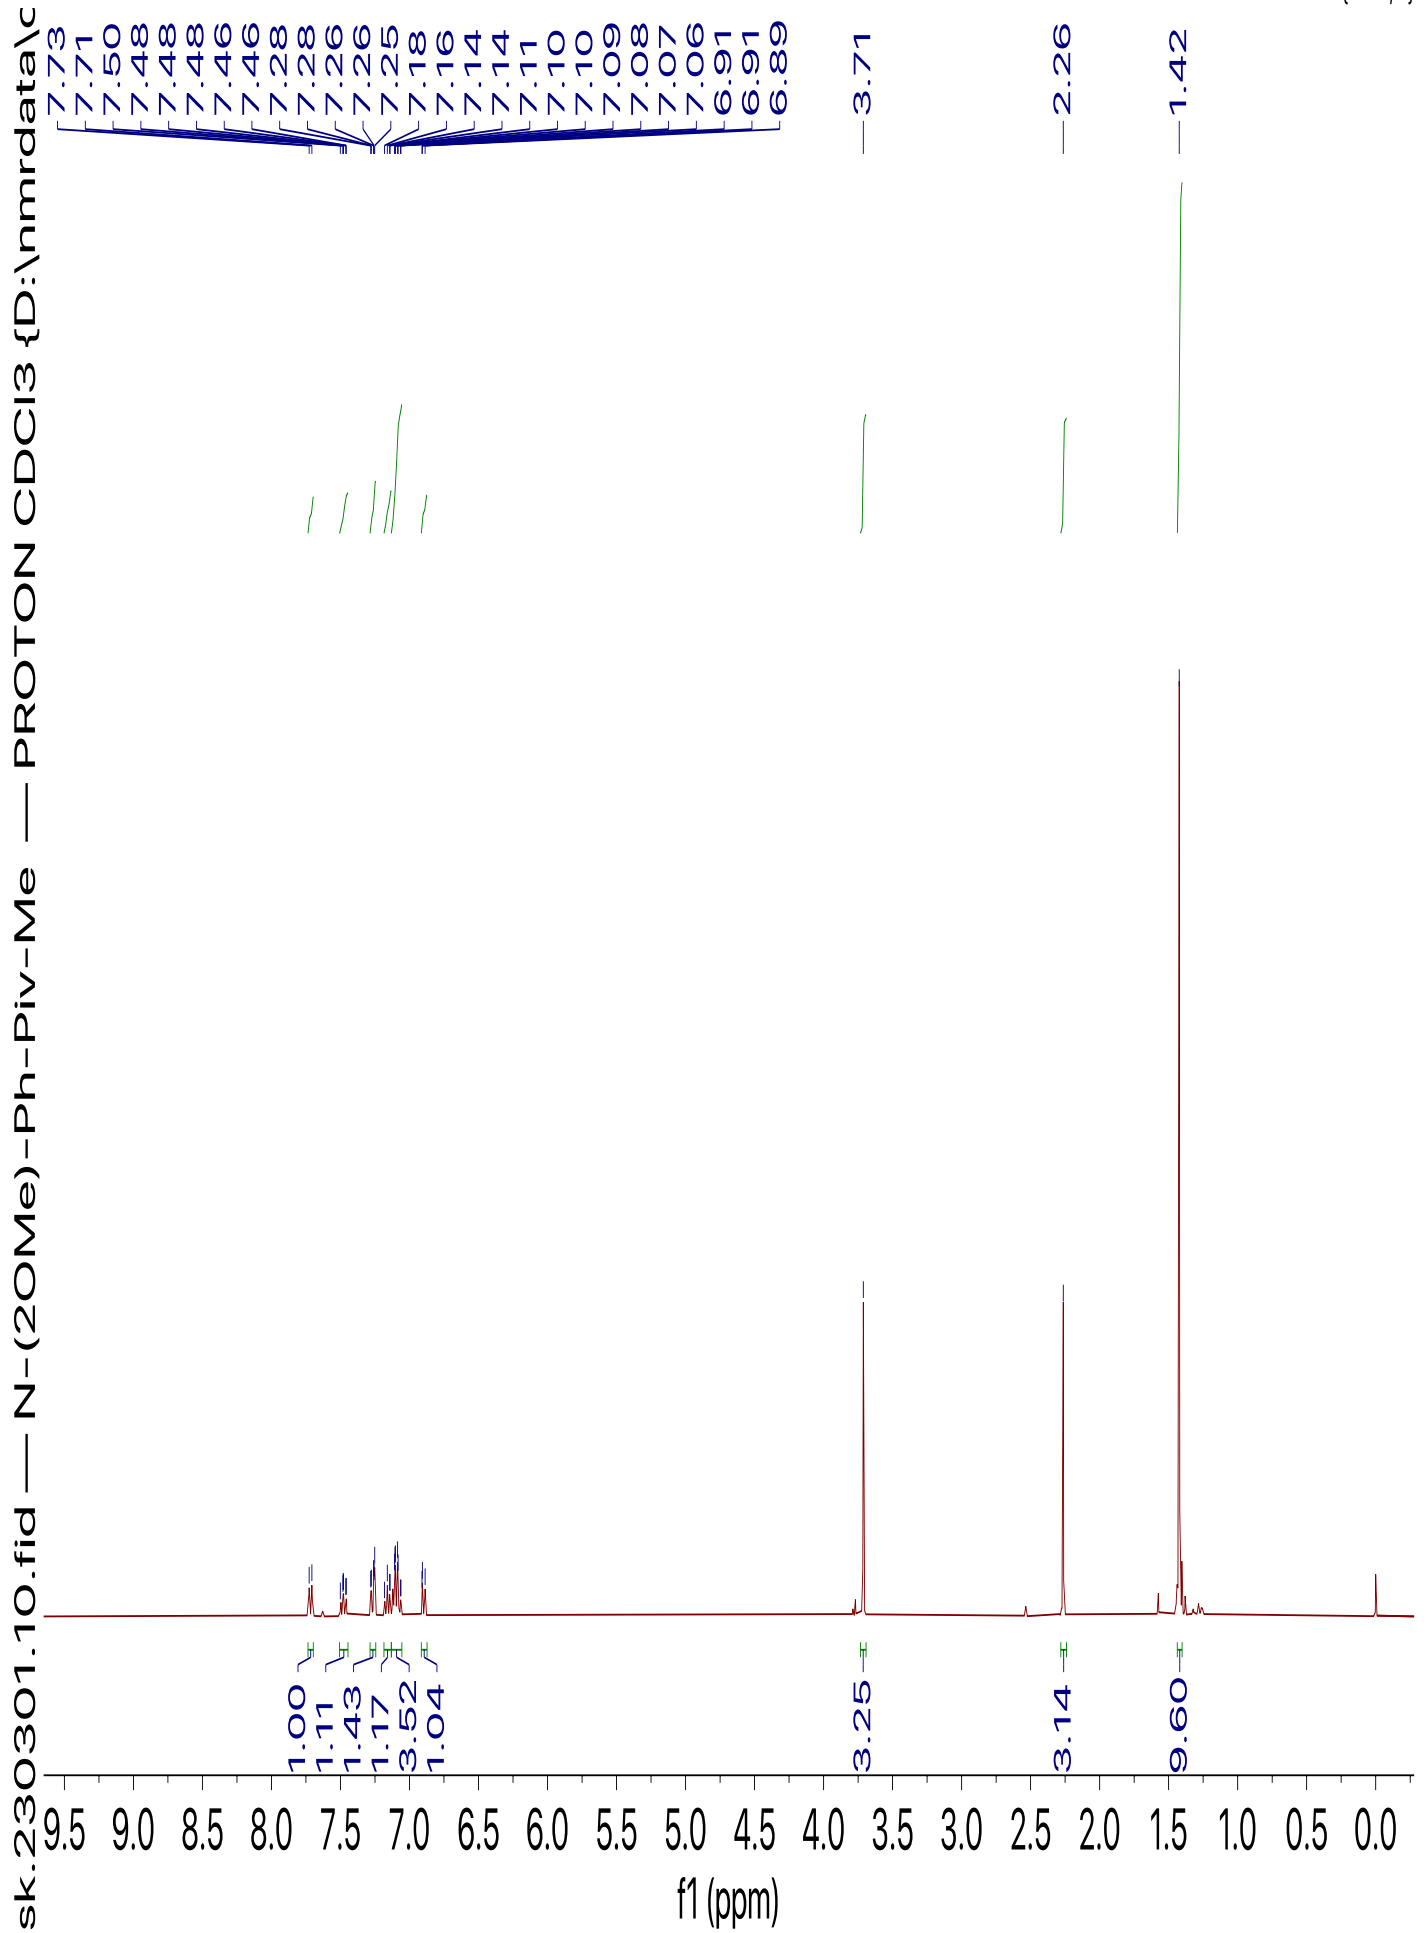

sk-2.230301.11.fid — N-(2OMe)-Ph-Piv-Me — C13CPD CDCl3 {D:\nmrdata\

3w, <sup>13</sup>C NMR (101 MHz, CDCl<sub>3</sub>)

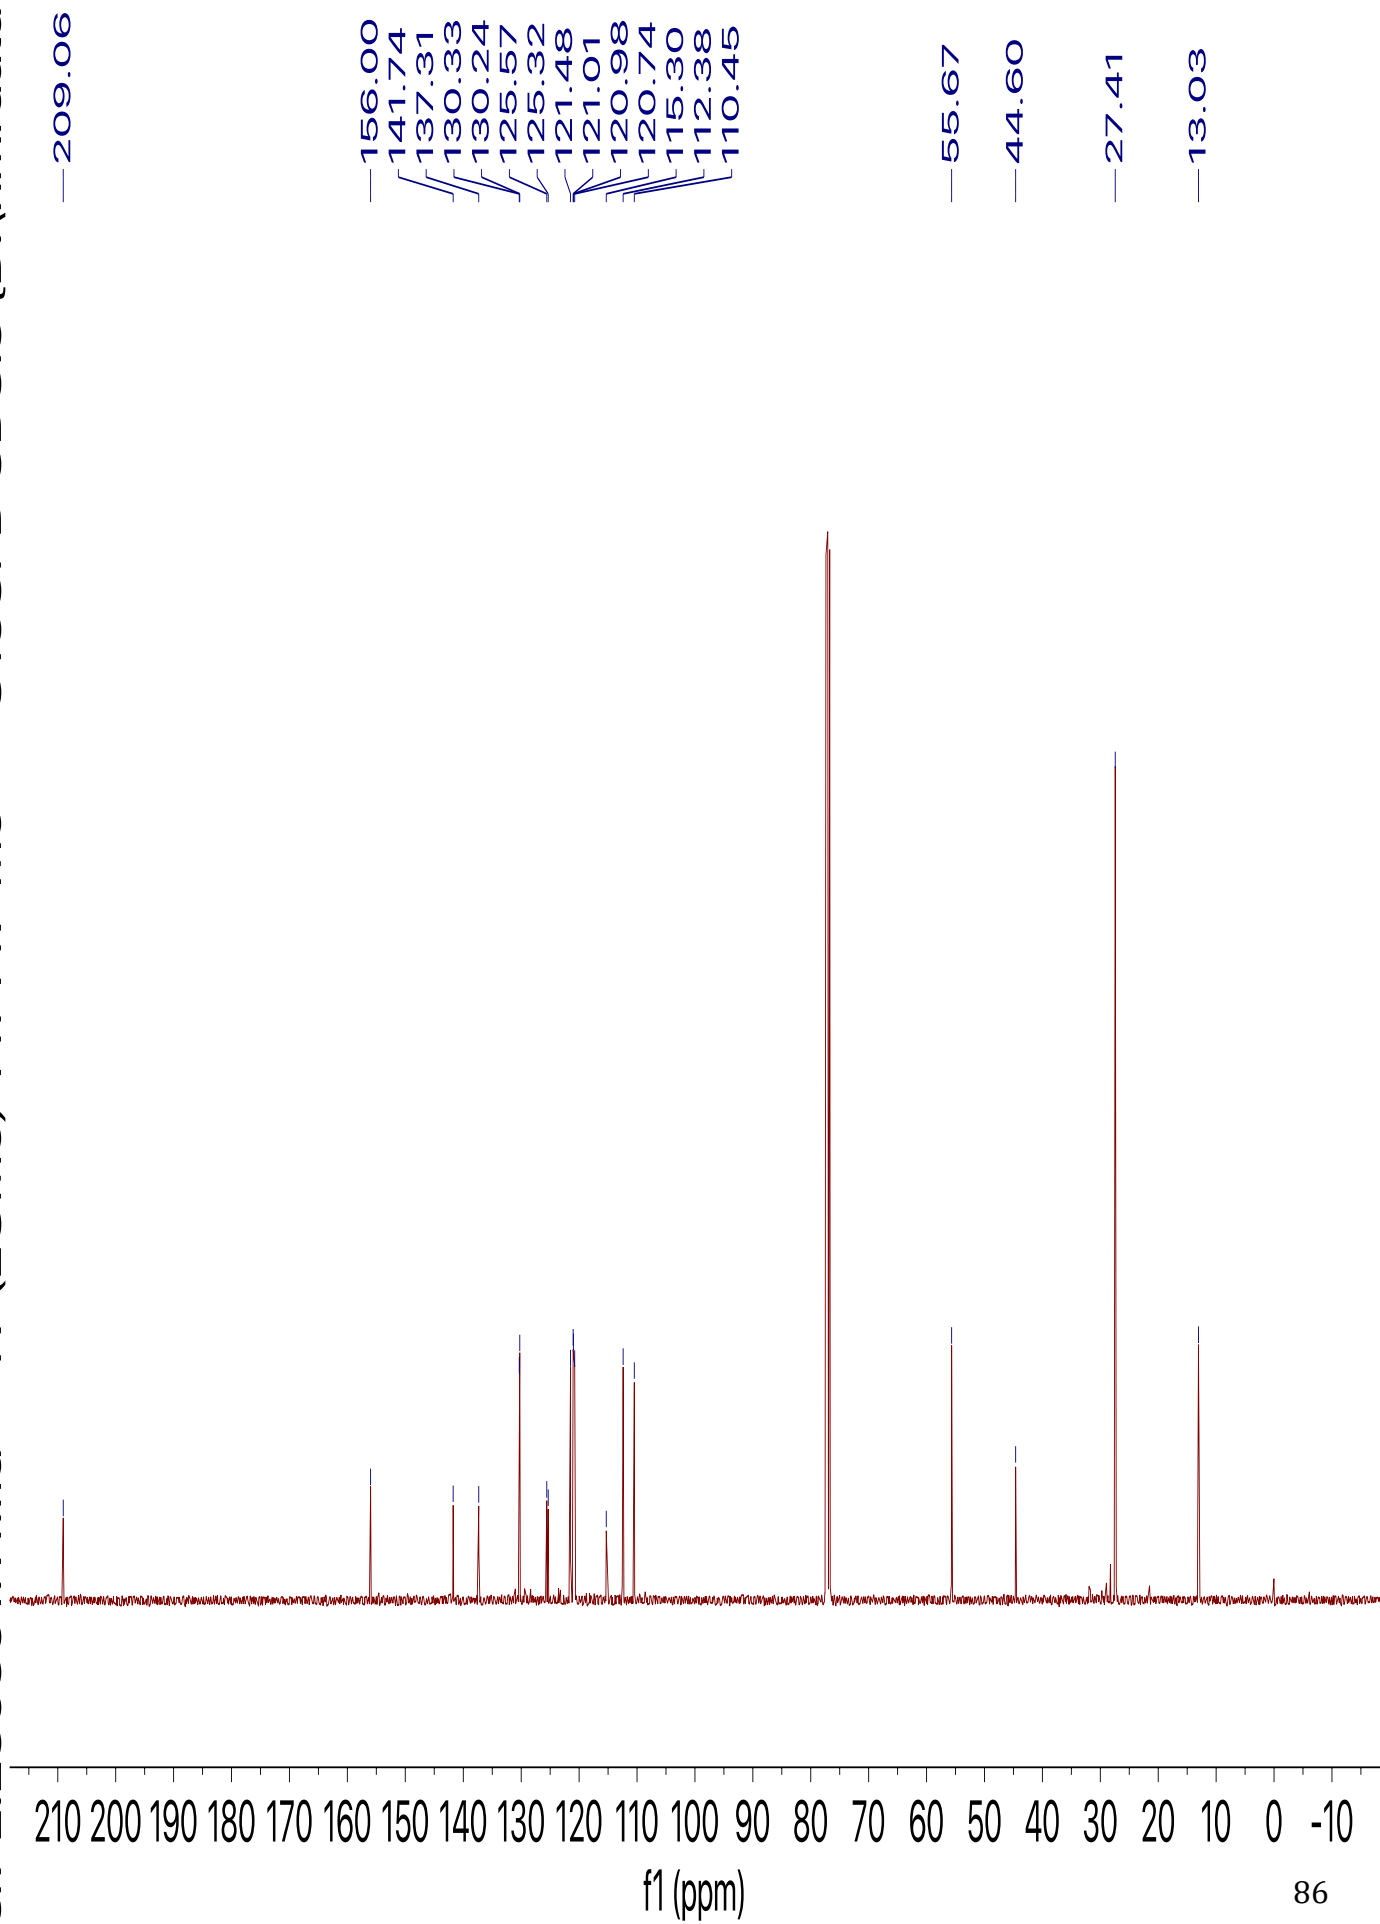

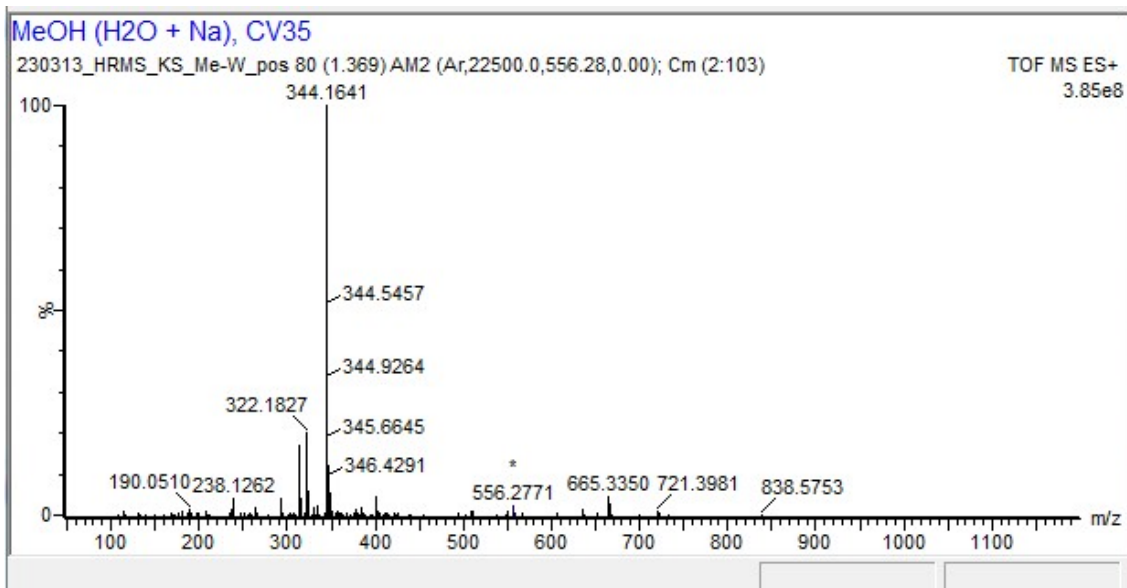

**Single Mass Analysis**

Tolerance = 2.0 mDa / DBE: min = -1.5, max = 100.0

Element prediction: Off

Number of isotope peaks used for i-FIT = 2

Monoisotopic Mass, Even Electron Ions

11 formula(e) evaluated with 2 results within limits (all results (up to 1000) for each mass)

Elements Used:

C: 18-27      H: 20-26      N: 1-2      O: 1-3      Na: 0-2

| Mass     | Calc. Mass | mDa  | PPM  | DBE  | Formula         | Fit Conf % | C  | H  | N | O | Na |
|----------|------------|------|------|------|-----------------|------------|----|----|---|---|----|
| 344.1641 | 344.1651   | -1.0 | -2.9 | 13.5 | C23 H22 N O2    | 4094.74    | 23 | 22 | 1 | 2 |    |
|          | 344.1626   | 1.5  | 4.4  | 10.5 | C21 H23 N O2 Na | 425.26     | 21 | 23 | 1 | 2 | 1  |

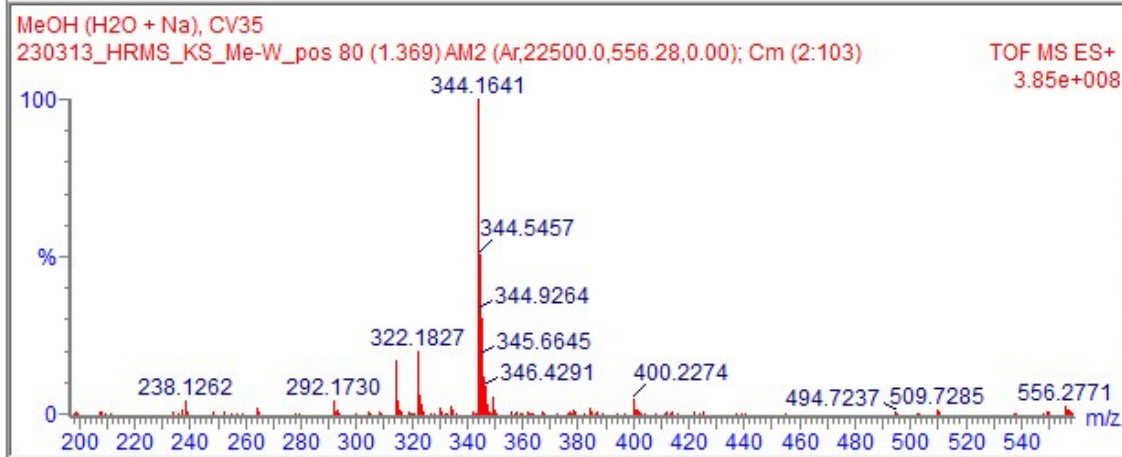

HRMS spectra of 3W

## 6. References

1. S. Kathiravan, P. Anaspure, Z. Tianshu, and I. A. Nicholls, *Org. Lett.*, 2021, **23**, 3331-3336.
2. S. Fuse, K. Suzuki, T. Kuchimaru, T. Kadonosono, H. Ueda, S. Sato, S. Kizaka-Kondoh, and H. Nakamura, *Bioorganic Med. Chem.* 2020, **28**, 115207.
3. D. A. Fernandez, M. Gulias, J. L. Mascarenas, and F. Lopez, *Angew. Chem. Int. Ed.* 2017, **56**, 9541-9545
4. D. R. Stuart, E. Villemure, and K. Fagnou, *J. Am. Chem. Soc.* 2007, **129**, 12072-12073.
5. M. Farizyan, A. Mondal, S. Mal, F. Deufel, M. van Gemmeren, *J. Am. Chem. Soc.* 2021, **143**, 16370-16376.
6. E. Tan, O. Quinonero, M. E. de Orbe, and A. M. Echavarren, *ACS Catal.* 2018, **8**, 2166-2172.
